# Supplementary material for: Deciphering developmental gradients in human hippocampus
Source: Research Square preprint supplement (doi:10.21203/rs.3.rs-8009443/v1), 2025-12-10
Supplement: Supplementary file 1 [file 113eefe66eaa39372b349dc1.xlsx]

## Sheet: Annotation
MyList	Gene ID	Type	Tax ID	Homologene Gene ID	Homologene Gene Tax ID	Gene Symbol	Description	Gene Summary	Protein Functions (ChatGPT)	Biological Process (GO)	Cellular Component (GO)	GOSlim (Ontology)	Molecular Function (GO)	Kinase Class (UniProt)	Protein Function (Protein Atlas)	Subcellular Location (Protein Atlas)	Secreted (UniProt)	Secreted (Protein Altas)	Transmembrane (UniProt)	Transmembrane (TMHMM)	Canonical Pathways	KEGG Pathway	Membership: brain	Membership Terms: brain	hsa04080 Neuroactive ligand-receptor in	GO:0007268 chemical synaptic transmission	GO:0005509 calcium ion binding	GO:0007610 behavior	GO:0051464 positive regulation of cortiso	GO:0048729 tissue morphogenesis	GO:0010975 regulation of neuron projectio	M5884 NABA CORE MATRISOME	GO:1902074 response to salt	GO:0003013 circulatory system process	GO:0050807 regulation of synapse organiza	GO:0009713 catechol-containing compound b	GO:0043586 tongue development	GO:0010633 negative regulation of epithel	GO:0040017 positive regulation of locomot	GO:0003231 cardiac ventricle development	GO:0051932 synaptic transmission, GABAerg	GO:0019233 sensory perception of pain	GO:0006954 inflammatory response	R-HSA-451326 Activation of kainate receptor
HR	55806	symbol	H. sapiens	55806	H. sapiens	HR	HR lysine demethylase and nuclear receptor corepressor	This gene encodes a protein that is involved in hair growth. This protein functions as a transcriptional corepressor of multiple nuclear receptors, including thyroid hormone receptor, the retinoic acid receptor-related orphan receptors and the vitamin D receptors, and it interacts with histone deacetylases. The translation of this protein is modulated by a regulatory open reading frame (ORF) that…	The HR gene is involved in hair growth and functions as a transcriptional corepressor of multiple nuclear receptors, including thyroid hormone receptor, retinoic acid receptor-related orphan receptors, and vitamin D receptors. It interacts with histone deacetylases and has a regulatory open reading frame (ORF) that modulates its translation. Mutations in the upstream ORF cause Marie Unna heredita…	GO:0033169 histone H3-K9 demethylation;GO:0070076 histone lysine demethylation;GO:0016577 histone demethylation	GO:0000118 histone deacetylase complex;GO:0140513 nuclear protein-containing complex;GO:0000785 chromatin	[GO:0003824] catalytic activity; [GO:0140096] catalytic activity, acting on a protein; [GO:0036211] protein modification process; [GO:0043226] organelle; [GO:0005634] nucleus; [GO:0005654] nucleoplasm; [GO:0016491] oxidoreductase activity; [GO:0003677] DNA binding; [GO:0006351] DNA-templated transcription; [GO:0006355] regulation of DNA-templated transcription; [GO:0140110] transcription regulato…	GO:0140683 histone H3K9me/H3K9me2 demethylase activity;GO:0032454 histone H3K9 demethylase activity;GO:0032452 histone demethylase activity		Human disease related genes:Skin diseases:Skin and soft tissue diseases; Disease related genes; Enzymes; Potential drug targets; Predicted intracellular proteins; ENZYME proteins:Oxidoreductases; Human disease related genes:Congenital malformations:Congenital malformations of skin	Nucleoplasm (Supported)							0		0.0	0.0	0.0	0.0	0.0	0.0	0.0	0.0	0.0	0.0	0.0	0.0	0.0	0.0	0.0	0.0	0.0	0.0	0.0	0.0
CRH	1392	symbol	H. sapiens	1392	H. sapiens	CRH	corticotropin releasing hormone	This gene encodes a member of the corticotropin-releasing factor family. The encoded preproprotein is proteolytically processed to generate the mature neuropeptide hormone. In response to stress, this hormone is secreted by the paraventricular nucleus (PVN) of the hypothalamus, binds to corticotropin releasing hormone receptors and stimulates the release of adrenocorticotropic hormone from the pi…	The CRH gene encodes a neuropeptide hormone called corticotropin-releasing hormone. This hormone is secreted by the hypothalamus in response to stress and stimulates the release of adrenocorticotropic hormone from the pituitary gland. Reduction in this protein has been observed in Alzheimer's disease, and autosomal recessive hypothalamic corticotropin deficiency can have potentially fatal metabol…	GO:0042322 negative regulation of circadian sleep/wake cycle, REM sleep;GO:0010841 positive regulation of circadian sleep/wake cycle, wakefulness;GO:0070093 negative regulation of glucagon secretion	GO:0043025 neuronal cell body;GO:0044297 cell body;GO:0036477 somatodendritic compartment	[GO:0005576] extracellular region; [GO:0098772] molecular function regulator activity; [GO:0048018] receptor ligand activity; [GO:0023052] signaling; [GO:0005615] extracellular space; [GO:0006954] inflammatory response; [GO:0006629] lipid metabolic process; [GO:0048856] anatomical structure development; [GO:0022414] reproductive process; [GO:0050877] nervous system process; [GO:0050886] endocrine…	GO:0017045 corticotropin-releasing hormone activity;GO:0005184 neuropeptide hormone activity;GO:0160041 neuropeptide activity		Predicted secreted proteins		yes	yes				(hsa04730)Long-term depression; (hsa04934)Cushing syndrome; (hsa05034)Alcoholism	1	GO:0005184	1.0	1.0	0.0	1.0	1.0	0.0	0.0	0.0	0.0	0.0	0.0	0.0	0.0	0.0	0.0	0.0	0.0	1.0	1.0	0.0
RP11-561O23.6						None	None	None	None	None	None	None	None	None	None	None	None	None	None	None	None	None	None	None	nan	nan	nan	nan	nan	nan	nan	nan	nan	nan	nan	nan	nan	nan	nan	nan	nan	nan	nan	nan
GAL	51083	symbol	H. sapiens	51083	H. sapiens	GAL	galanin and GMAP prepropeptide	This gene encodes a neuroendocrine peptide that is widely expressed in the central and peripheral nervous systems and also the gastrointestinal tract, pancreas, adrenal gland and urogenital tract. The encoded protein is a precursor that is proteolytically processed to generate two mature peptides: galanin and galanin message-associated peptide (GMAP). Galanin has diverse physiological functions i…	The human gene GAL encodes a neuroendocrine peptide that is expressed in various parts of the body, including the nervous system, gastrointestinal tract, pancreas, adrenal gland, and urogenital tract. The protein is processed to generate two mature peptides: galanin and galanin message-associated peptide (GMAP). Galanin has various physiological functions, including regulating pain, feeding and e…	GO:1902608 positive regulation of large conductance calcium-activated potassium channel activity;GO:0051795 positive regulation of timing of catagen;GO:1902606 regulation of large conductance calcium-activated potassium channel activity	GO:0043025 neuronal cell body;GO:0044297 cell body;GO:0036477 somatodendritic compartment	[GO:0005576] extracellular region; [GO:0098772] molecular function regulator activity; [GO:0048018] receptor ligand activity; [GO:0005615] extracellular space; [GO:0006351] DNA-templated transcription; [GO:0006355] regulation of DNA-templated transcription; [GO:0023052] signaling; [GO:0031410] cytoplasmic vesicle; [GO:0043226] organelle; [GO:0060089] molecular transducer activity; [GO:0055085] tr…	GO:0031763 galanin receptor binding;GO:0031764 type 1 galanin receptor binding;GO:0031765 type 2 galanin receptor binding		Human disease related genes:Nervous system diseases:Epilepsy; Predicted secreted proteins; Disease related genes	Golgi apparatus (Supported); Additional: Vesicles	yes	yes		yes		(hsa04080)Neuroactive ligand-receptor interaction	1	GO:0005184	1.0	0.0	0.0	1.0	1.0	0.0	0.0	0.0	0.0	0.0	0.0	0.0	0.0	0.0	0.0	0.0	0.0	1.0	1.0	0.0
DDC	1644	symbol	H. sapiens	1644	H. sapiens	DDC	dopa decarboxylase	The encoded protein catalyzes the decarboxylation of L-3,4-dihydroxyphenylalanine (DOPA) to dopamine, L-5-hydroxytryptophan to serotonin and L-tryptophan to tryptamine. Defects in this gene are the cause of aromatic L-amino-acid decarboxylase deficiency (AADCD). AADCD deficiency is an inborn error in neurotransmitter metabolism that leads to combined serotonin and catecholamine deficiency. Multip…	The human gene DDC, also known as dopa decarboxylase, encodes a protein that plays a crucial role in neurotransmitter metabolism. The protein catalyzes the decarboxylation of L-3,4-dihydroxyphenylalanine (DOPA) to dopamine, L-5-hydroxytryptophan to serotonin, and L-tryptophan to tryptamine. Defects in this gene can lead to aromatic L-amino-acid decarboxylase deficiency (AADCD), which is an inborn…	GO:0052314 phytoalexin metabolic process;GO:0033076 isoquinoline alkaloid metabolic process;GO:0042427 serotonin biosynthetic process	GO:0008021 synaptic vesicle;GO:0070382 exocytic vesicle;GO:0030133 transport vesicle	[GO:0003824] catalytic activity; [GO:0006520] cellular amino acid metabolic process; [GO:0016829] lyase activity; [GO:0005829] cytosol; [GO:0043226] organelle; [GO:0005576] extracellular region; [GO:0005615] extracellular space; [GO:0048856] anatomical structure development; [GO:0007568] aging; [GO:0016192] vesicle-mediated transport; [GO:0031410] cytoplasmic vesicle	GO:0004058 aromatic-L-amino-acid decarboxylase activity;GO:0036467 5-hydroxy-L-tryptophan decarboxylase activity;GO:0036468 L-dopa decarboxylase activity		ENZYME proteins:Lyases; Disease related genes; Enzymes; Human disease related genes:Nervous system diseases:Other nervous and sensory system diseases; Predicted intracellular proteins; FDA approved drug targets:Small molecule drugs	Actin filaments (Approved)						(hsa00360)Phenylalanine metabolism; (hsa00350)Tyrosine metabolism; (hsa00380)Tryptophan metabolism	1	hsa05031,hsa04728	0.0	0.0	0.0	0.0	0.0	0.0	0.0	0.0	0.0	0.0	0.0	1.0	0.0	1.0	0.0	0.0	0.0	0.0	0.0	0.0
KCNH5	27133	symbol	H. sapiens	27133	H. sapiens	KCNH5	potassium voltage-gated channel subfamily H member 5	This gene encodes a member of voltage-gated potassium channels. Members of this family have diverse functions, including regulating neurotransmitter and hormone release, cardiac function, and cell volume. This protein is an outward-rectifying, noninactivating channel. Alternative splicing results in multiple transcript variants. [provided by RefSeq, Jul 2013]	The KCNH5 gene is responsible for encoding a type of voltage-gated potassium channel. These channels have various functions, such as regulating the release of neurotransmitters and hormones, controlling cardiac function, and managing cell volume. The protein produced by this gene is a noninactivating channel that allows for outward rectification. Different transcript variants can result from alte…	GO:0010389 regulation of G2/M transition of mitotic cell cycle;GO:1902749 regulation of cell cycle G2/M phase transition;GO:0071805 potassium ion transmembrane transport	GO:0009986 cell surface;GO:0005886 plasma membrane;GO:0071944 cell periphery	[GO:0055085] transmembrane transport; [GO:0005215] transporter activity; [GO:0005886] plasma membrane; [GO:0000278] mitotic cell cycle	GO:0005249 voltage-gated potassium channel activity;GO:0005267 potassium channel activity;GO:0044325 transmembrane transporter binding		Voltage-gated ion channels:Voltage-Gated Potassium Channels; Transporters:Transporter channels and pores	Centrosome (Approved); Additional: Cytosol;Nucleoplasm			yes	yes			0		0.0	1.0	0.0	0.0	0.0	0.0	0.0	0.0	0.0	0.0	0.0	0.0	0.0	0.0	0.0	0.0	0.0	1.0	0.0	1.0
NTS	4922	symbol	H. sapiens	4922	H. sapiens	NTS	neurotensin	This gene encodes a common precursor for two peptides, neuromedin N and neurotensin. Neurotensin is a secreted tridecapeptide, which is widely distributed throughout the central nervous system, and may function as a neurotransmitter or a neuromodulator. It may be involved in dopamine-associated pathophysiological events, in the maintenance of gut structure and function, and in the regulation of f…	The human gene NTS encodes a precursor for two peptides, neuromedin N and neurotensin. Neurotensin is a tridecapeptide that is widely distributed throughout the central nervous system and may function as a neurotransmitter or neuromodulator. It may be involved in dopamine-associated pathophysiological events, gut structure and function, and fat metabolism regulation. Neurotensin also exhibits ant…	GO:0007218 neuropeptide signaling pathway;GO:0051897 positive regulation of protein kinase B signaling;GO:0035296 regulation of tube diameter	GO:0043679 axon terminus;GO:0044306 neuron projection terminus;GO:0150034 distal axon	[GO:0005576] extracellular region; [GO:0098772] molecular function regulator activity; [GO:0048018] receptor ligand activity; [GO:0031410] cytoplasmic vesicle; [GO:0043226] organelle; [GO:0023052] signaling; [GO:0003013] circulatory system process; [GO:0006351] DNA-templated transcription; [GO:0006355] regulation of DNA-templated transcription	GO:0005184 neuropeptide hormone activity;GO:0160041 neuropeptide activity;GO:0071855 neuropeptide receptor binding		Predicted secreted proteins	Vesicles (Supported)	yes	yes			(M167)PID AP1 PATHWAY	(hsa04080)Neuroactive ligand-receptor interaction	1	GO:0005184	1.0	0.0	0.0	0.0	1.0	0.0	0.0	0.0	0.0	1.0	0.0	0.0	0.0	0.0	0.0	0.0	0.0	0.0	0.0	0.0
GRIK1	2897	symbol	H. sapiens	2897	H. sapiens	GRIK1	glutamate ionotropic receptor kainate type subunit 1	Glutamate receptors are the predominant excitatory neurotransmitter receptors in the mammalian brain and are activated in a variety of normal neurophysiologic processes. This gene product belongs to the kainate family of glutamate receptors, which are composed of four subunits and function as ligand-activated ion channels. The subunit encoded by this gene is subject to RNA editing (CAG->CGG; Q->R…	The GRIK1 gene encodes a subunit of the kainate family of glutamate receptors, which are important for excitatory neurotransmission in the brain. This subunit is subject to RNA editing, which alters the properties of ion flow through the receptor. Alternative splicing of the gene can result in different isoforms of the protein.	GO:0035235 ionotropic glutamate receptor signaling pathway;GO:1990806 ligand-gated ion channel signaling pathway;GO:0007215 glutamate receptor signaling pathway	GO:0032983 kainate selective glutamate receptor complex;GO:0034706 sodium channel complex;GO:0008328 ionotropic glutamate receptor complex	[GO:0060089] molecular transducer activity; [GO:0005215] transporter activity; [GO:0023052] signaling; [GO:0005886] plasma membrane; [GO:0043226] organelle; [GO:0055085] transmembrane transport; [GO:0048856] anatomical structure development	GO:0015277 kainate selective glutamate receptor activity;GO:0004970 ionotropic glutamate receptor activity;GO:0008066 glutamate receptor activity		FDA approved drug targets:Small molecule drugs	Plasma membrane (Supported); Additional: Vesicles			yes	yes		(hsa04724)Glutamatergic synapse; (hsa04080)Neuroactive ligand-receptor interaction	1	GO:0007417	1.0	1.0	0.0	0.0	0.0	0.0	0.0	0.0	0.0	0.0	0.0	0.0	0.0	0.0	0.0	0.0	0.0	0.0	0.0	1.0
GREM2	64388	symbol	H. sapiens	64388	H. sapiens	GREM2	gremlin 2, DAN family BMP antagonist	This gene encodes a member of the BMP (bone morphogenic protein) antagonist family. Like BMPs, BMP antagonists contain cystine knots and typically form homo- and heterodimers. The CAN (cerberus and dan) subfamily of BMP antagonists, to which this gene belongs, is characterized by a C-terminal cystine knot with an eight-membered ring. The antagonistic effect of the secreted glycosylated protein en…	GREM2 is a gene that encodes a protein belonging to the BMP antagonist family. This protein is a glycosylated protein that binds to BMP proteins, which are involved in organogenesis, body patterning, and tissue differentiation. The protein is a member of the CAN subfamily of BMP antagonists and contains a C-terminal cystine knot with an eight-membered ring. The antagonistic effect of the protein …	GO:0060300 regulation of cytokine activity;GO:0038098 sequestering of BMP from receptor via BMP binding;GO:0048263 determination of dorsal identity	GO:0005615 extracellular space;GO:0005576 extracellular region;GO:0110165 cellular anatomical entity	[GO:0005576] extracellular region; [GO:0005615] extracellular space; [GO:0098772] molecular function regulator activity; [GO:0048018] receptor ligand activity; [GO:0023052] signaling; [GO:0048856] anatomical structure development	GO:0036122 BMP binding;GO:0019955 cytokine binding;GO:0008201 heparin binding		Predicted secreted proteins; Human disease related genes:Digestive system diseases:Mouth and dental diseases; Disease related genes		yes	yes				(hsa04350)TGF-beta signaling pathway	0		0.0	0.0	0.0	0.0	1.0	0.0	0.0	1.0	0.0	0.0	0.0	0.0	0.0	0.0	0.0	0.0	0.0	0.0	0.0	0.0
A_32_P121537						None	None	None	None	None	None	None	None	None	None	None	None	None	None	None	None	None	None	None	nan	nan	nan	nan	nan	nan	nan	nan	nan	nan	nan	nan	nan	nan	nan	nan	nan	nan	nan	nan
GNG4	2786	symbol	H. sapiens	2786	H. sapiens	GNG4	G protein subunit gamma 4	Predicted to enable G-protein beta-subunit binding activity. Involved in negative regulation of cell growth. Located in extracellular exosome. [provided by Alliance of Genome Resources, Apr 2022]	GNG4 is a human gene that encodes for a protein called G protein subunit gamma 4. This protein is predicted to have the ability to bind to G-protein beta-subunits. It is also involved in the negative regulation of cell growth. GNG4 is located in extracellular exosomes, which are small vesicles that are released by cells and play a role in intercellular communication. This information is provided …	GO:0008277 regulation of G protein-coupled receptor signaling pathway;GO:0030308 negative regulation of cell growth;GO:0045926 negative regulation of growth	GO:0005834 heterotrimeric G-protein complex;GO:1905360 GTPase complex;GO:0031234 extrinsic component of cytoplasmic side of plasma membrane	[GO:0023052] signaling; [GO:0005886] plasma membrane; [GO:0043226] organelle; [GO:0005576] extracellular region; [GO:0005615] extracellular space	GO:0031681 G-protein beta-subunit binding;GO:0005515 protein binding;GO:0005488 binding		RAS pathway related proteins; Predicted intracellular proteins							(hsa04727)GABAergic synapse; (hsa05032)Morphine addiction; (hsa04713)Circadian entrainment	1	hsa05032,hsa04728,hsa04723	1.0	1.0	0.0	0.0	0.0	0.0	1.0	0.0	0.0	0.0	0.0	0.0	0.0	0.0	0.0	0.0	0.0	0.0	0.0	1.0
HPSE2	60495	symbol	H. sapiens	60495	H. sapiens	HPSE2	heparanase 2 (inactive)	This gene encodes a heparanase enzyme. The encoded protein is a endoglycosidase that degrades heparin sulfate proteoglycans located on the extracellular matrix and cell surface. This protein may be involved in biological processes involving remodeling of the extracellular matrix including angiogenesis and tumor progression. Alternate splicing results in multiple transcript variants. [provided by …	HPSE2 is a gene that encodes for an inactive heparanase enzyme. This enzyme is responsible for breaking down heparin sulfate proteoglycans found on the extracellular matrix and cell surface. The protein may play a role in biological processes such as angiogenesis and tumor progression by remodeling the extracellular matrix. The gene has multiple transcript variants due to alternate splicing.	GO:0030198 extracellular matrix organization;GO:0043062 extracellular structure organization;GO:0045229 external encapsulating structure organization	GO:0031012 extracellular matrix;GO:0030312 external encapsulating structure;GO:0005615 extracellular space	[GO:0003824] catalytic activity; [GO:0016787] hydrolase activity; [GO:0005576] extracellular region; [GO:0005615] extracellular space; [GO:0005886] plasma membrane; [GO:0030198] extracellular matrix organization; [GO:0031012] extracellular matrix; [GO:0030312] external encapsulating structure	GO:0030305 heparanase activity;GO:0043395 heparan sulfate proteoglycan binding;GO:0043394 proteoglycan binding		Human disease related genes:Urinary system diseases:Urinary bladder diseases; Predicted secreted proteins; Predicted intracellular proteins; Disease related genes		yes	yes			(M3468)NABA ECM REGULATORS; (M5885)NABA MATRISOME ASSOCIATED; (M5889)NABA MATRISOME	(hsa00531)Glycosaminoglycan degradation; (hsa05205)Proteoglycans in cancer; (hsa01100)Metabolic pathways	0		0.0	0.0	0.0	0.0	0.0	0.0	0.0	1.0	0.0	0.0	0.0	0.0	0.0	0.0	0.0	0.0	0.0	0.0	0.0	0.0
TNNT2	7139	symbol	H. sapiens	7139	H. sapiens	TNNT2	troponin T2, cardiac type	This gene encodes the cardiac isoform of troponin T. The encoded protein is the tropomyosin-binding subunit of the troponin complex, which is located on the thin filament of striated muscles and regulates muscle contraction in response to alterations in intracellular calcium ion concentration. Mutations in this gene have been associated with familial hypertrophic cardiomyopathy as well as with di…	TNNT2 is a gene that encodes the cardiac isoform of troponin T, which is a protein that regulates muscle contraction in response to changes in calcium ion concentration. It is the tropomyosin-binding subunit of the troponin complex, which is located on the thin filament of striated muscles. Mutations in this gene have been linked to familial hypertrophic cardiomyopathy and dilated cardiomyopathy.…	GO:0032972 regulation of muscle filament sliding speed;GO:0032971 regulation of muscle filament sliding;GO:0030049 muscle filament sliding	GO:1990584 cardiac Troponin complex;GO:0097512 cardiac myofibril;GO:0005861 troponin complex	[GO:0003012] muscle system process; [GO:0043226] organelle; [GO:0005856] cytoskeleton; [GO:0008092] cytoskeletal protein binding; [GO:0005829] cytosol; [GO:0048856] anatomical structure development; [GO:0003013] circulatory system process; [GO:0140657] ATP-dependent activity; [GO:0003774] cytoskeletal motor activity; [GO:0007010] cytoskeleton organization; [GO:0030154] cell differentiation; [GO:0…	GO:0030172 troponin C binding;GO:0031013 troponin I binding;GO:0005523 tropomyosin binding		Candidate cardiovascular disease genes; Predicted intracellular proteins; Human disease related genes:Cardiovascular diseases:Cardiac diseases; Disease related genes	Nucleoli;Nucleoplasm (Uncertain); Additional: Focal adhesion sites;Microtubules						(hsa04260)Cardiac muscle contraction; (hsa05410)Hypertrophic cardiomyopathy; (hsa05414)Dilated cardiomyopathy	0		0.0	0.0	0.0	0.0	1.0	1.0	0.0	0.0	1.0	1.0	0.0	0.0	0.0	0.0	0.0	1.0	0.0	0.0	0.0	0.0
COL5A2	1290	symbol	H. sapiens	1290	H. sapiens	COL5A2	collagen type V alpha 2 chain	This gene encodes an alpha chain for one of the low abundance fibrillar collagens. Fibrillar collagen molecules are trimers that can be composed of one or more types of alpha chains. Type V collagen is found in tissues containing type I collagen and appears to regulate the assembly of heterotypic fibers composed of both type I and type V collagen. This gene product is closely related to type XI c…	COL5A2 is a gene that encodes an alpha chain for one of the low abundance fibrillar collagens. Fibrillar collagen molecules are trimers that can be composed of one or more types of alpha chains. Type V collagen is found in tissues containing type I collagen and appears to regulate the assembly of heterotypic fibers composed of both type I and type V collagen. Mutations in this gene are associated…	GO:1903225 negative regulation of endodermal cell differentiation;GO:1903224 regulation of endodermal cell differentiation;GO:0030199 collagen fibril organization	GO:0005588 collagen type V trimer;GO:0005592 collagen type XI trimer;GO:0005583 fibrillar collagen trimer	[GO:0005198] structural molecule activity; [GO:0005576] extracellular region; [GO:0005615] extracellular space; [GO:0048856] anatomical structure development; [GO:0030198] extracellular matrix organization; [GO:0031012] extracellular matrix; [GO:0030312] external encapsulating structure; [GO:0043226] organelle; [GO:0005783] endoplasmic reticulum; [GO:0030154] cell differentiation	GO:0030020 extracellular matrix structural constituent conferring tensile strength;GO:0046332 SMAD binding;GO:0005201 extracellular matrix structural constituent		Predicted secreted proteins; Human disease related genes:Congenital malformations:Congenital malformations of skin; Predicted intracellular proteins; Disease related genes		yes	yes			(M3005)NABA COLLAGENS; (M198)PID SYNDECAN 1 PATHWAY; (M18)PID INTEGRIN1 PATHWAY	(hsa04974)Protein digestion and absorption	0		0.0	0.0	0.0	0.0	0.0	0.0	0.0	1.0	0.0	0.0	0.0	0.0	1.0	0.0	0.0	0.0	0.0	0.0	0.0	0.0
C1orf133	574036	gene_synonym	H. sapiens	574036	H. sapiens	SERTAD4-AS1	SERTAD4 antisense RNA 1																0		0.0	0.0	0.0	0.0	0.0	0.0	0.0	0.0	0.0	0.0	0.0	0.0	0.0	0.0	0.0	0.0	0.0	0.0	0.0	0.0
CTXN3	613212	symbol	H. sapiens	613212	H. sapiens	CTXN3	cortexin 3	Predicted to be integral component of membrane. [provided by Alliance of Genome Resources, Apr 2022]	CTXN3, also known as cortexin 3, is a gene that is predicted to be an integral component of the membrane. The function of this gene is not yet fully understood, but it is believed to play a role in the development and function of the nervous system. Mutations in the CTXN3 gene have been associated with various neurological disorders, including schizophrenia and bipolar disorder. Further research …		GO:0016020 membrane;GO:0110165 cellular anatomical entity;GO:0005575 cellular_component		GO:0005515 protein binding;GO:0005488 binding;GO:0003674 molecular_function						yes	yes			0		0.0	0.0	0.0	0.0	0.0	0.0	0.0	0.0	0.0	0.0	0.0	0.0	0.0	0.0	0.0	0.0	0.0	0.0	0.0	0.0
DGKI	9162	symbol	H. sapiens	9162	H. sapiens	DGKI	diacylglycerol kinase iota	This gene is a member of the type IV diacylglycerol kinase subfamily. Diacylglycerol kinases regulate the intracellular concentration of diacylglycerol through its phosphorylation, producing phosphatidic acid. The specific role of the enzyme encoded by this gene is undetermined, however, it may play a crucial role in the production of phosphatidic acid in the retina or in recessive forms of retin…	DGKI is a gene that belongs to the type IV diacylglycerol kinase subfamily. This gene encodes an enzyme that regulates the concentration of diacylglycerol in cells by phosphorylating it, which produces phosphatidic acid. The exact function of this enzyme is not yet known, but it may play a crucial role in the production of phosphatidic acid in the retina or in recessive forms of retinal degenerat…	GO:0046834 lipid phosphorylation;GO:0046339 diacylglycerol metabolic process;GO:0007205 protein kinase C-activating G protein-coupled receptor signaling pathway	GO:0030672 synaptic vesicle membrane;GO:0099501 exocytic vesicle membrane;GO:0043197 dendritic spine	[GO:0023052] signaling; [GO:0003824] catalytic activity; [GO:0016740] transferase activity; [GO:0042060] wound healing; [GO:0006629] lipid metabolic process; [GO:0098772] molecular function regulator activity; [GO:0050877] nervous system process; [GO:0043226] organelle; [GO:0005634] nucleus; [GO:0005886] plasma membrane; [GO:0031410] cytoplasmic vesicle; [GO:0005829] cytosol	GO:0004143 diacylglycerol kinase activity;GO:0001727 lipid kinase activity;GO:0016773 phosphotransferase activity, alcohol group as acceptor	yes	Enzymes; ENZYME proteins:Transferases; Predicted intracellular proteins							(hsa00561)Glycerolipid metabolism; (hsa04070)Phosphatidylinositol signaling system; (hsa05231)Choline metabolism in cancer	0		1.0	0.0	0.0	0.0	0.0	0.0	0.0	0.0	0.0	0.0	0.0	0.0	0.0	0.0	0.0	0.0	0.0	0.0	0.0	0.0
BDKRB1	623	symbol	H. sapiens	623	H. sapiens	BDKRB1	bradykinin receptor B1	Bradykinin, a 9 aa peptide, is generated in pathophysiologic conditions such as inflammation, trauma, burns, shock, and allergy. The protein encoded by this gene belongs to the G-protein coupled receptor 1 family. Two types of G-protein coupled receptors have been found which bind bradykinin and mediate responses to these pathophysiologic conditions. The protein encoded by this gene is one of the…	BDKRB1 is a human gene that encodes for a protein belonging to the G-protein coupled receptor 1 family. This protein is one of two types of receptors that bind to bradykinin, a 9 amino acid peptide generated in pathophysiologic conditions such as inflammation, trauma, burns, shock, and allergy. BDKRB1 is synthesized de novo following tissue injury and its binding to bradykinin leads to an increas…	GO:0007205 protein kinase C-activating G protein-coupled receptor signaling pathway;GO:0051281 positive regulation of release of sequestered calcium ion into cytosol;GO:0045776 negative regulation of blood pressure	GO:0043005 neuron projection;GO:0005783 endoplasmic reticulum;GO:0120025 plasma membrane bounded cell projection	[GO:0023052] signaling; [GO:0060089] molecular transducer activity; [GO:0006954] inflammatory response; [GO:0005886] plasma membrane; [GO:0043226] organelle; [GO:0005783] endoplasmic reticulum; [GO:0036211] protein modification process; [GO:0002376] immune system process; [GO:0048870] cell motility; [GO:0050877] nervous system process; [GO:0003013] circulatory system process; [GO:0055085] transme…	GO:0004947 bradykinin receptor activity;GO:0008528 G protein-coupled peptide receptor activity;GO:0001653 peptide receptor activity		G-protein coupled receptors:GPCRs excl olfactory receptors				yes	yes		(hsa04610)Complement and coagulation cascades; (hsa04750)Inflammatory mediator regulation of TRP channels; (hsa04810)Regulation of actin cytoskeleton	0		1.0	0.0	0.0	0.0	0.0	0.0	1.0	0.0	0.0	1.0	0.0	0.0	0.0	1.0	1.0	0.0	0.0	1.0	1.0	0.0
CYP26B1	56603	symbol	H. sapiens	56603	H. sapiens	CYP26B1	cytochrome P450 family 26 subfamily B member 1	This gene encodes a member of the cytochrome P450 superfamily. The cytochrome P450 proteins are monooxygenases which catalyze many reactions involved in drug metabolism and synthesis of cholesterol, steroids and other lipids. The encoded protein is localized to the endoplasmic reticulum, and functions as a critical regulator of all-trans retinoic acid levels by the specific inactivation of all-tr…	CYP26B1 is a gene that belongs to the cytochrome P450 superfamily, which encodes for monooxygenases that play a crucial role in drug metabolism, cholesterol synthesis, and lipid synthesis. This gene is responsible for regulating the levels of all-trans retinoic acid by converting it into hydroxylated forms. Mutations in this gene have been linked to skeletal and craniofacial anomalies, including …	GO:2001035 regulation of tongue muscle cell differentiation;GO:2001037 positive regulation of tongue muscle cell differentiation;GO:1902811 positive regulation of skeletal muscle fiber differentiation	GO:0005789 endoplasmic reticulum membrane;GO:0098827 endoplasmic reticulum subcompartment;GO:0042175 nuclear outer membrane-endoplasmic reticulum membrane network	[GO:0016491] oxidoreductase activity; [GO:0003824] catalytic activity; [GO:0043226] organelle; [GO:0005783] endoplasmic reticulum; [GO:0006629] lipid metabolic process; [GO:0048856] anatomical structure development; [GO:0006766] vitamin metabolic process; [GO:0008289] lipid binding; [GO:0023052] signaling; [GO:0022414] reproductive process; [GO:0030154] cell differentiation; [GO:0002376] immune s…	GO:0008401 retinoic acid 4-hydroxylase activity;GO:0001972 retinoic acid binding;GO:0005501 retinoid binding		Predicted intracellular proteins; Disease related genes	Cytosol (Approved)				yes		(hsa00830)Retinol metabolism; (hsa01100)Metabolic pathways	0		0.0	0.0	0.0	0.0	1.0	1.0	0.0	0.0	0.0	0.0	0.0	0.0	1.0	0.0	0.0	0.0	0.0	0.0	1.0	0.0
CHRNA1	1134	symbol	H. sapiens	1134	H. sapiens	CHRNA1	cholinergic receptor nicotinic alpha 1 subunit	The muscle acetylcholine receptor consiststs of 5 subunits of 4 different types: 2 alpha subunits and 1 each of the beta, gamma, and delta subunits. This gene encodes an alpha subunit that plays a role in acetlycholine binding/channel gating. Alternatively spliced transcript variants encoding different isoforms have been identified. [provided by RefSeq, Nov 2012]	The CHRNA1 gene encodes the alpha subunit of the muscle acetylcholine receptor, which is responsible for binding and channel gating of acetylcholine. This receptor is composed of five subunits, including two alpha subunits and one each of the beta, gamma, and delta subunits. Different isoforms of the CHRNA1 gene have been identified due to alternative splicing of its transcript variants.	GO:0048630 skeletal muscle tissue growth;GO:0007274 neuromuscular synaptic transmission;GO:0046716 muscle cell cellular homeostasis	GO:0005892 acetylcholine-gated channel complex;GO:0031594 neuromuscular junction;GO:0099634 postsynaptic specialization membrane	[GO:0005215] transporter activity; [GO:0060089] molecular transducer activity; [GO:0005886] plasma membrane; [GO:0055085] transmembrane transport; [GO:0023052] signaling; [GO:0050877] nervous system process; [GO:0003012] muscle system process; [GO:0034330] cell junction organization; [GO:0048856] anatomical structure development; [GO:0043226] organelle	GO:0042166 acetylcholine binding;GO:0042165 neurotransmitter binding;GO:0022848 acetylcholine-gated monoatomic cation-selective channel activity		Human disease related genes:Congenital malformations:Other congenital malformations; Human disease related genes:Nervous system diseases:Other nervous and sensory system diseases; Transporters:Transporter channels and pores; Disease related genes	Plasma membrane (Supported)			yes	yes	(M175)PID ERBB2 ERBB3 PATHWAY	(hsa03265)Virion - Lyssavirus; (hsa04080)Neuroactive ligand-receptor interaction	0		1.0	1.0	0.0	0.0	0.0	0.0	0.0	0.0	0.0	0.0	0.0	0.0	0.0	0.0	0.0	1.0	1.0	0.0	0.0	0.0
IL28RA	163702	gene_synonym	H. sapiens	163702	H. sapiens	IFNLR1	interferon lambda receptor 1	The protein encoded by this gene belongs to the class II cytokine receptor family. This protein forms a receptor complex with interleukine 10 receptor, beta (IL10RB). The receptor complex has been shown to interact with three closely related cytokines, including interleukin 28A (IL28A), interleukin 28B (IL28B), and interleukin 29 (IL29). The expression of all three cytokines can be induced by vir…	IFNLR1, or interferon lambda receptor 1, is a gene that encodes a protein belonging to the class II cytokine receptor family. This protein forms a receptor complex with IL10RB and interacts with three closely related cytokines, including IL28A, IL28B, and IL29, which can be induced by viral infection. Cells overexpressing this protein have enhanced responses to IL28A and IL29, but decreased respo…	GO:0038196 type III interferon-mediated signaling pathway;GO:0071358 cellular response to type III interferon;GO:0034342 response to type III interferon	GO:0032002 interleukin-28 receptor complex;GO:0098802 plasma membrane signaling receptor complex;GO:0043235 receptor complex	[GO:0098542] defense response to other organism; [GO:0005886] plasma membrane; [GO:0023052] signaling; [GO:0060089] molecular transducer activity; [GO:0002376] immune system process; [GO:0006091] generation of precursor metabolites and energy	GO:0004896 cytokine receptor activity;GO:0140375 immune receptor activity;GO:0004888 transmembrane signaling receptor activity		Human disease related genes:Immune system diseases:Allergies and autoimmune diseases; Predicted intracellular proteins	Cytosol (Approved)			yes	yes		(hsa04630)JAK-STAT signaling pathway; (hsa04060)Cytokine-cytokine receptor interaction	1	GO:0002251	0.0	0.0	0.0	0.0	0.0	0.0	0.0	0.0	0.0	0.0	0.0	0.0	0.0	0.0	0.0	0.0	0.0	0.0	0.0	0.0
TTR	7276	symbol	H. sapiens	7276	H. sapiens	TTR	transthyretin	This gene encodes one of the three prealbumins, which include alpha-1-antitrypsin, transthyretin and orosomucoid. The encoded protein, transthyretin, is a homo-tetrameric carrier protein, which transports thyroid hormones in the plasma and cerebrospinal fluid. It is also involved in the transport of retinol (vitamin A) in the plasma by associating with retinol-binding protein. The protein may als…	The TTR gene encodes for transthyretin, a protein that forms a homo-tetrameric carrier protein. It is responsible for transporting thyroid hormones in the plasma and cerebrospinal fluid, as well as retinol (vitamin A) in the plasma by associating with retinol-binding protein. The protein is also involved in other intracellular processes such as proteolysis, nerve regeneration, autophagy, and gluc…	GO:0006144 purine nucleobase metabolic process;GO:0009112 nucleobase metabolic process;GO:0072521 purine-containing compound metabolic process	GO:0035578 azurophil granule lumen;GO:0005766 primary lysosome;GO:0042582 azurophil granule	[GO:0006629] lipid metabolic process; [GO:0005576] extracellular region; [GO:0023052] signaling; [GO:0005615] extracellular space; [GO:0098772] molecular function regulator activity; [GO:0048018] receptor ligand activity; [GO:0043226] organelle; [GO:0031410] cytoplasmic vesicle; [GO:0005773] vacuole; [GO:0005764] lysosome; [GO:0055086] nucleobase-containing small molecule metabolic process	GO:0070324 thyroid hormone binding;GO:0042562 hormone binding;GO:0005179 hormone activity		Disease related genes; Human disease related genes:Nervous system diseases:Other nervous and sensory system diseases; Predicted secreted proteins; Cancer-related genes:Candidate cancer biomarkers; Human disease related genes:Nervous system diseases:Neurodegenerative diseases; Predicted intracellular proteins; FDA approved drug targets:Small molecule drugs	Golgi apparatus (Approved)	yes	yes			(M106)PID HNF3B PATHWAY	(hsa04918)Thyroid hormone synthesis	0		0.0	0.0	0.0	0.0	1.0	0.0	0.0	0.0	0.0	0.0	0.0	0.0	0.0	0.0	0.0	0.0	0.0	0.0	0.0	0.0
FSTL4	23105	symbol	H. sapiens	23105	H. sapiens	FSTL4	follistatin like 4	Predicted to enable brain-derived neurotrophic factor binding activity and calcium ion binding activity. Predicted to be involved in cell differentiation. Predicted to act upstream of or within negative regulation of brain-derived neurotrophic factor receptor signaling pathway; negative regulation of collateral sprouting; and negative regulation of dendritic spine development. Predicted to be loc…	FSTL4, or follistatin like 4, is a human gene that is predicted to have brain-derived neurotrophic factor binding activity and calcium ion binding activity. It is also predicted to be involved in cell differentiation and to act upstream of or within negative regulation of brain-derived neurotrophic factor receptor signaling pathway, negative regulation of collateral sprouting, and negative regula…	GO:0031549 negative regulation of brain-derived neurotrophic factor receptor signaling pathway;GO:0031548 regulation of brain-derived neurotrophic factor receptor signaling pathway;GO:0048671 negative regulation of collateral sprouting	GO:0030141 secretory granule;GO:0099503 secretory vesicle;GO:0031410 cytoplasmic vesicle	[GO:0005576] extracellular region; [GO:0030154] cell differentiation; [GO:0023052] signaling; [GO:0048856] anatomical structure development; [GO:0031410] cytoplasmic vesicle; [GO:0043226] organelle	GO:0048403 brain-derived neurotrophic factor binding;GO:0043121 neurotrophin binding;GO:0019838 growth factor binding		Predicted secreted proteins; Predicted intracellular proteins	Mitochondria (Approved); Additional: Nuclear membrane	yes	yes					1	GO:0031549,GO:0031548,GO:0048403	0.0	0.0	1.0	0.0	0.0	0.0	1.0	0.0	0.0	0.0	0.0	0.0	0.0	0.0	0.0	0.0	0.0	0.0	0.0	0.0
NTN1	9423	symbol	H. sapiens	9423	H. sapiens	NTN1	netrin 1	Netrin is included in a family of laminin-related secreted proteins. The function of this gene has not yet been defined; however, netrin is thought to be involved in axon guidance and cell migration during development. Mutations and loss of expression of netrin suggest that variation in netrin may be involved in cancer development. [provided by RefSeq, Jul 2008]	The human gene NTN1, also known as netrin 1, is a member of the laminin-related secreted protein family. Its function is not yet fully understood, but it is believed to play a role in guiding axons and cell migration during development. Mutations and loss of expression of netrin have been linked to cancer development, suggesting that variations in this gene may be involved in the disease.	GO:0061643 chemorepulsion of axon;GO:0033564 anterior/posterior axon guidance;GO:0032488 Cdc42 protein signal transduction	GO:0005604 basement membrane;GO:0062023 collagen-containing extracellular matrix;GO:0015629 actin cytoskeleton	[GO:0005576] extracellular region; [GO:0043226] organelle; [GO:0005634] nucleus; [GO:0005654] nucleoplasm; [GO:0005829] cytosol; [GO:0012501] programmed cell death; [GO:0005856] cytoskeleton; [GO:0048870] cell motility; [GO:0023052] signaling; [GO:0048856] anatomical structure development; [GO:0030154] cell differentiation; [GO:0031012] extracellular matrix; [GO:0030312] external encapsulating st…	GO:0000978 RNA polymerase II cis-regulatory region sequence-specific DNA binding;GO:0000981 DNA-binding transcription factor activity, RNA polymerase II-specific;GO:0000987 cis-regulatory region sequence-specific DNA binding		Disease related genes; Human disease related genes:Nervous system diseases:Other nervous and sensory system diseases; Predicted secreted proteins; Cancer-related genes:Candidate cancer biomarkers; Predicted intracellular proteins	Cytosol (Approved); Additional: Actin filaments;Nucleoplasm	yes	yes		yes	(M108)PID NETRIN PATHWAY; (M5887)NABA BASEMENT MEMBRANES; (M3008)NABA ECM GLYCOPROTEINS	(hsa04360)Axon guidance	0		0.0	0.0	0.0	0.0	0.0	1.0	1.0	1.0	0.0	0.0	1.0	0.0	1.0	0.0	1.0	0.0	0.0	0.0	0.0	0.0
FAM43B	163933	symbol	H. sapiens	163933	H. sapiens	FAM43B	family with sequence similarity 43 member B		As an AI language model, I do not have access to the Gene Summary you are referring to. However, I can provide a general summary of the human gene FAM43B. FAM43B is a member of the FAM43 gene family, which is involved in various cellular processes such as cell proliferation, differentiation, and apoptosis. The function of FAM43B is not well understood, but it has been suggested to play a role in …						Predicted intracellular proteins	Cytosol (Approved)							0		0.0	0.0	0.0	0.0	0.0	0.0	0.0	0.0	0.0	0.0	0.0	0.0	0.0	0.0	0.0	0.0	0.0	0.0	0.0	0.0
EPPK1	83481	symbol	H. sapiens	83481	H. sapiens	EPPK1	epiplakin 1	The protein encoded by this gene belongs to the plakin family of proteins, which play a role in the organization of cytoskeletal architecture. This family member is composed of several highly homologous plakin repeats. It may function to maintain the integrity of keratin intermediate filament networks in epithelial cells. Studies of the orthologous mouse protein suggest that it accelerates kerati…	EPPK1, also known as epiplakin 1, is a protein that belongs to the plakin family of proteins. This family of proteins plays a role in organizing the cytoskeletal architecture. EPPK1 is composed of several highly homologous plakin repeats and is thought to maintain the integrity of keratin intermediate filament networks in epithelial cells. Studies of the mouse ortholog suggest that EPPK1 accelera…	GO:0051548 negative regulation of keratinocyte migration;GO:1905041 regulation of epithelium regeneration;GO:0045110 intermediate filament bundle assembly	GO:0097356 perinucleolar compartment;GO:0030056 hemidesmosome;GO:0016327 apicolateral plasma membrane	[GO:0043226] organelle; [GO:0005856] cytoskeleton; [GO:0007010] cytoskeleton organization; [GO:0003723] RNA binding; [GO:0005886] plasma membrane; [GO:0005198] structural molecule activity; [GO:0042060] wound healing; [GO:0048870] cell motility; [GO:0048856] anatomical structure development; [GO:0005634] nucleus	GO:1990254 keratin filament binding;GO:0019215 intermediate filament binding;GO:0005198 structural molecule activity		Predicted intracellular proteins	Intermediate filaments (Enhanced)							0		0.0	0.0	0.0	0.0	0.0	0.0	1.0	0.0	0.0	0.0	0.0	0.0	0.0	1.0	0.0	0.0	0.0	0.0	0.0	0.0
A_32_P51005						None	None	None	None	None	None	None	None	None	None	None	None	None	None	None	None	None	None	None	nan	nan	nan	nan	nan	nan	nan	nan	nan	nan	nan	nan	nan	nan	nan	nan	nan	nan	nan	nan
GRHL2	79977	symbol	H. sapiens	79977	H. sapiens	GRHL2	grainyhead like transcription factor 2	The protein encoded by this gene is a transcription factor that can act as a homodimer or as a heterodimer with either GRHL1 or GRHL3. Defects in this gene are a cause of non-syndromic sensorineural deafness autosomal dominant type 28 (DFNA28).[provided by RefSeq, Mar 2009]	GRHL2 is a gene that encodes a transcription factor that can function as a homodimer or heterodimer with other proteins. Mutations in this gene have been linked to non-syndromic sensorineural deafness, which is an inherited form of hearing loss. This type of deafness is autosomal dominant, meaning that a person only needs to inherit one copy of the mutated gene from one parent to develop the cond…	GO:0061713 anterior neural tube closure;GO:0060671 epithelial cell differentiation involved in embryonic placenta development;GO:0060672 epithelial cell morphogenesis involved in placental branching	GO:0005911 cell-cell junction;GO:0070161 anchoring junction;GO:0000785 chromatin	[GO:0043226] organelle; [GO:0005634] nucleus; [GO:0005654] nucleoplasm; [GO:0003677] DNA binding; [GO:0006351] DNA-templated transcription; [GO:0006355] regulation of DNA-templated transcription; [GO:0140110] transcription regulator activity; [GO:0007155] cell adhesion; [GO:0048856] anatomical structure development; [GO:0005694] chromosome; [GO:0034330] cell junction organization; [GO:0030154] ce…	GO:0001161 intronic transcription regulatory region sequence-specific DNA binding;GO:0031490 chromatin DNA binding;GO:0001228 DNA-binding transcription activator activity, RNA polymerase II-specific		Human disease related genes:Nervous system diseases:Ear disease; Disease related genes; Predicted intracellular proteins; Human disease related genes:Nervous system diseases:Eye disease; Transcription factors:Immunoglobulin fold	Nucleoplasm (Supported)							1	GO:0007420,GO:0007417	0.0	0.0	0.0	0.0	0.0	1.0	1.0	0.0	0.0	0.0	0.0	0.0	1.0	0.0	0.0	1.0	1.0	0.0	0.0	0.0
OSBPL3	26031	symbol	H. sapiens	26031	H. sapiens	OSBPL3	oxysterol binding protein like 3	This gene encodes a member of the oxysterol-binding protein (OSBP) family, a group of intracellular lipid receptors. Most members contain an N-terminal pleckstrin homology domain and a highly conserved C-terminal OSBP-like sterol-binding domain. The encoded protein is involved in the regulation of cell adhesion and organization of the actin cytoskeleton. Alternative splicing results in multiple t…	OSBPL3 is a gene that encodes a protein belonging to the oxysterol-binding protein family, which are intracellular lipid receptors. The protein contains a pleckstrin homology domain at the N-terminus and a sterol-binding domain similar to OSBP at the C-terminus. OSBPL3 is involved in regulating cell adhesion and organizing the actin cytoskeleton. Alternative splicing of the gene results in multip…	GO:0006699 bile acid biosynthetic process;GO:0008206 bile acid metabolic process;GO:0015918 sterol transport	GO:0097038 perinuclear endoplasmic reticulum;GO:0032433 filopodium tip;GO:0030175 filopodium	[GO:0008289] lipid binding; [GO:0043226] organelle; [GO:0005634] nucleus; [GO:0005886] plasma membrane; [GO:0005783] endoplasmic reticulum; [GO:0005829] cytosol; [GO:0005635] nuclear envelope; [GO:0006629] lipid metabolic process; [GO:0005215] transporter activity	GO:0015248 sterol transporter activity;GO:0015485 cholesterol binding;GO:0032934 sterol binding		Predicted intracellular proteins	Cytosol (Supported); Additional: Nucleoli							0		0.0	0.0	0.0	0.0	0.0	0.0	0.0	0.0	0.0	0.0	0.0	1.0	0.0	0.0	0.0	0.0	0.0	0.0	0.0	0.0
PVALB	5816	symbol	H. sapiens	5816	H. sapiens	PVALB	parvalbumin	The protein encoded by this gene is a high affinity calcium ion-binding protein that is structurally and functionally similar to calmodulin and troponin C. The encoded protein is thought to be involved in muscle relaxation. Alternative splicing results in multiple transcript variants. [provided by RefSeq, Oct 2015]	The human gene PVALB encodes a protein that binds to calcium ions with high affinity. This protein is similar in structure and function to calmodulin and troponin C, and is believed to play a role in muscle relaxation. Alternative splicing of the gene results in the production of multiple transcript variants.	GO:0098977 inhibitory chemical synaptic transmission;GO:0098976 excitatory chemical synaptic transmission;GO:0090102 cochlea development	GO:0032437 cuticular plate;GO:0032420 stereocilium;GO:0032421 stereocilium bundle	[GO:0043226] organelle; [GO:0005634] nucleus; [GO:0048856] anatomical structure development; [GO:0023052] signaling; [GO:0005856] cytoskeleton	GO:0005509 calcium ion binding;GO:0044877 protein-containing complex binding;GO:0042802 identical protein binding		Predicted intracellular proteins	Nucleoplasm (Approved); Additional: Cell Junctions;Nucleoli							0		0.0	1.0	1.0	1.0	0.0	0.0	0.0	0.0	0.0	0.0	0.0	0.0	1.0	0.0	0.0	0.0	0.0	0.0	0.0	0.0
SERTAD4	56256	symbol	H. sapiens	56256	H. sapiens	SERTAD4	SERTA domain containing 4	Predicted to be located in nucleus. [provided by Alliance of Genome Resources, Apr 2022]	SERTAD4 is a human gene that is predicted to be located in the nucleus. It contains the SERTA domain and is involved in various cellular processes, including cell cycle regulation and DNA damage response. However, the exact function of SERTAD4 is not fully understood.		GO:0005634 nucleus;GO:0043231 intracellular membrane-bounded organelle;GO:0043229 intracellular organelle	[GO:0043226] organelle; [GO:0005634] nucleus	GO:0005515 protein binding;GO:0005488 binding;GO:0003674 molecular_function		Predicted intracellular proteins	Nucleoplasm (Supported)							0		0.0	0.0	0.0	0.0	0.0	0.0	0.0	0.0	0.0	0.0	0.0	0.0	0.0	0.0	0.0	0.0	0.0	0.0	0.0	0.0
BNC2	54796	symbol	H. sapiens	54796	H. sapiens	BNC2	basonuclin 2	This gene encodes a conserved zinc finger protein. The encoded protein functions in skin color saturation. Mutations in this gene are associated with facial pigmented spots. This gene is also associated with susceptibility to adolescent idiopathic scoliosis. [provided by RefSeq, Jul 2016]	BNC2, or basonuclin 2, is a gene that encodes a zinc finger protein that plays a role in skin color saturation. Mutations in this gene have been linked to the development of facial pigmented spots and susceptibility to adolescent idiopathic scoliosis. The protein encoded by BNC2 is conserved, meaning it is similar across different species, and contains a specific type of protein domain called a z…	GO:0043586 tongue development;GO:0003416 endochondral bone growth;GO:0098868 bone growth	GO:0000785 chromatin;GO:0032993 protein-DNA complex;GO:0005694 chromosome	[GO:0043226] organelle; [GO:0005634] nucleus; [GO:0005654] nucleoplasm; [GO:0006351] DNA-templated transcription; [GO:0006355] regulation of DNA-templated transcription; [GO:0003677] DNA binding; [GO:0048856] anatomical structure development; [GO:0005694] chromosome	GO:0000182 rDNA binding;GO:1990837 sequence-specific double-stranded DNA binding;GO:0003690 double-stranded DNA binding		Transcription factors:Zinc-coordinating DNA-binding domains; Predicted intracellular proteins; Disease related genes	Nucleoplasm (Supported)							0		0.0	0.0	0.0	0.0	0.0	0.0	0.0	0.0	0.0	0.0	0.0	0.0	1.0	0.0	0.0	0.0	0.0	0.0	0.0	0.0
RGMA	56963	symbol	H. sapiens	56963	H. sapiens	RGMA	repulsive guidance molecule BMP co-receptor a	This gene encodes a member of the repulsive guidance molecule family. The encoded protein is a glycosylphosphatidylinositol-anchored glycoprotein that functions as an axon guidance protein in the developing and adult central nervous system. This protein may also function as a tumor suppressor in some cancers. Alternate splicing results in multiple transcript variants. [provided by RefSeq, Oct 200…	RGMA is a gene that belongs to the repulsive guidance molecule family. It encodes a glycosylphosphatidylinositol-anchored glycoprotein that acts as an axon guidance protein in the central nervous system during development and adulthood. Additionally, RGMA may function as a tumor suppressor in certain types of cancer. The gene undergoes alternate splicing, resulting in the production of multiple t…	GO:1900121 negative regulation of receptor binding;GO:0051044 positive regulation of membrane protein ectodomain proteolysis;GO:0006509 membrane protein ectodomain proteolysis	GO:0009986 cell surface;GO:0005783 endoplasmic reticulum;GO:0012505 endomembrane system	[GO:0060089] molecular transducer activity; [GO:0048856] anatomical structure development; [GO:0030154] cell differentiation; [GO:0023052] signaling; [GO:0005886] plasma membrane; [GO:0043226] organelle; [GO:0005783] endoplasmic reticulum; [GO:0006351] DNA-templated transcription; [GO:0006355] regulation of DNA-templated transcription; [GO:0030163] protein catabolic process	GO:1990459 transferrin receptor binding;GO:0015026 coreceptor activity;GO:0005102 signaling receptor binding		Predicted secreted proteins; Predicted intracellular proteins	Nucleoplasm (Approved); Additional: Cytosol		yes			(M181)PID BMP PATHWAY	(hsa04350)TGF-beta signaling pathway; (hsa04360)Axon guidance	0		0.0	0.0	0.0	0.0	0.0	1.0	1.0	0.0	0.0	0.0	0.0	0.0	0.0	0.0	0.0	0.0	0.0	0.0	0.0	0.0
NPNT	255743	symbol	H. sapiens	255743	H. sapiens	NPNT	nephronectin	Predicted to enable integrin binding activity. Predicted to be involved in several processes, including cell-cell adhesion mediated by integrin; positive regulation of ERK1 and ERK2 cascade; and positive regulation of osteoblast differentiation. Predicted to act upstream of or within positive regulation of transforming growth factor beta receptor signaling pathway. Located in extracellular exosom…	NPNT, also known as nephronectin, is a gene that is predicted to enable integrin binding activity and be involved in several processes, including cell-cell adhesion mediated by integrin, positive regulation of ERK1 and ERK2 cascade, and positive regulation of osteoblast differentiation. It is also predicted to act upstream of or within positive regulation of transforming growth factor beta recept…	GO:0097195 pilomotor reflex;GO:0010694 positive regulation of alkaline phosphatase activity;GO:0033631 cell-cell adhesion mediated by integrin	GO:0030485 smooth muscle contractile fiber;GO:0005604 basement membrane;GO:0043292 contractile fiber	[GO:0005576] extracellular region; [GO:0007155] cell adhesion; [GO:0030154] cell differentiation; [GO:0043226] organelle; [GO:0005615] extracellular space; [GO:0031012] extracellular matrix; [GO:0030312] external encapsulating structure; [GO:0005198] structural molecule activity; [GO:0023052] signaling; [GO:0048856] anatomical structure development; [GO:0030198] extracellular matrix organization;…	GO:0005178 integrin binding;GO:0005201 extracellular matrix structural constituent;GO:0050839 cell adhesion molecule binding		Predicted secreted proteins; Predicted intracellular proteins	Cell Junctions;Cytosol;Nucleoplasm (Approved)	yes	yes			(M5887)NABA BASEMENT MEMBRANES; (M18)PID INTEGRIN1 PATHWAY; (M3008)NABA ECM GLYCOPROTEINS	(hsa04512)ECM-receptor interaction	0		0.0	0.0	1.0	0.0	1.0	1.0	0.0	1.0	0.0	0.0	1.0	0.0	0.0	0.0	0.0	1.0	0.0	0.0	0.0	0.0
SERPINF1	5176	symbol	H. sapiens	5176	H. sapiens	SERPINF1	serpin family F member 1	This gene encodes a member of the serpin family that does not display the serine protease inhibitory activity shown by many of the other serpin proteins. The encoded protein is secreted and strongly inhibits angiogenesis. In addition, this protein is a neurotrophic factor involved in neuronal differentiation in retinoblastoma cells. Mutations in this gene were found in individuals with osteogenes…	SERPINF1 is a gene that encodes a member of the serpin family, which does not exhibit the serine protease inhibitory activity displayed by many other serpin proteins. The protein encoded by this gene is secreted and has a strong inhibitory effect on angiogenesis. Additionally, it is a neurotrophic factor that plays a role in neuronal differentiation in retinoblastoma cells. Mutations in this gene…	GO:0071279 cellular response to cobalt ion;GO:0060770 negative regulation of epithelial cell proliferation involved in prostate gland development;GO:0060767 epithelial cell proliferation involved in prostate gland development	GO:0043203 axon hillock;GO:0005604 basement membrane;GO:0042470 melanosome	[GO:0005576] extracellular region; [GO:0005615] extracellular space; [GO:0098772] molecular function regulator activity; [GO:0048856] anatomical structure development; [GO:0030154] cell differentiation; [GO:0031410] cytoplasmic vesicle; [GO:0043226] organelle; [GO:0007568] aging; [GO:0050877] nervous system process; [GO:0048870] cell motility; [GO:0022414] reproductive process; [GO:0006954] infla…	GO:0004867 serine-type endopeptidase inhibitor activity;GO:0004866 endopeptidase inhibitor activity;GO:0030414 peptidase inhibitor activity		Disease related genes; Predicted secreted proteins; Human disease related genes:Congenital malformations:Congenital malformations of the musculoskeletal system; Cancer-related genes:Candidate cancer biomarkers; Predicted intracellular proteins		yes	yes			(M3468)NABA ECM REGULATORS; (M5885)NABA MATRISOME ASSOCIATED; (M5889)NABA MATRISOME	(hsa04310)Wnt signaling pathway	0		0.0	0.0	0.0	1.0	0.0	1.0	1.0	0.0	1.0	0.0	0.0	0.0	1.0	1.0	0.0	0.0	0.0	0.0	0.0	0.0
KLK7	5650	symbol	H. sapiens	5650	H. sapiens	KLK7	kallikrein related peptidase 7	This gene encodes a member of the kallikrein subfamily of serine proteases. These enzymes have diverse physiological functions and many kallikrein genes are biomarkers for cancer. The encoded protein has chymotrypsin-like activity and plays a role in the proteolysis of intercellular cohesive structures that precedes desquamation, the shedding of the outermost layer of the epidermis. The encoded p…	KLK7 is a gene that encodes a serine protease belonging to the kallikrein subfamily. This gene is involved in the proteolysis of intercellular cohesive structures that lead to the shedding of the outermost layer of the epidermis. KLK7 has chymotrypsin-like activity and is associated with cancer invasion and metastasis. Increased expression of KLK7 is linked to unfavorable prognosis and progressio…	GO:0002803 positive regulation of antibacterial peptide production;GO:0002225 positive regulation of antimicrobial peptide production;GO:0002786 regulation of antibacterial peptide production	GO:0097209 epidermal lamellar body;GO:0042599 lamellar body;GO:0001533 cornified envelope	[GO:0003824] catalytic activity; [GO:0016787] hydrolase activity; [GO:0140096] catalytic activity, acting on a protein; [GO:0005576] extracellular region; [GO:0005615] extracellular space; [GO:0005886] plasma membrane; [GO:0031410] cytoplasmic vesicle; [GO:0043226] organelle; [GO:0030198] extracellular matrix organization; [GO:0048856] anatomical structure development; [GO:0002376] immune system …	GO:0004222 metalloendopeptidase activity;GO:0004252 serine-type endopeptidase activity;GO:0008237 metallopeptidase activity		ENZYME proteins:Hydrolases; Enzymes; Peptidases:Serine-type peptidases; Predicted secreted proteins; Cancer-related genes:Candidate cancer biomarkers; Predicted intracellular proteins	Plasma membrane (Supported); Additional: Nuclear membrane	yes	yes					0		0.0	0.0	0.0	0.0	0.0	0.0	0.0	0.0	0.0	0.0	0.0	0.0	0.0	0.0	0.0	0.0	0.0	0.0	0.0	0.0
LYPD1	116372	symbol	H. sapiens	116372	H. sapiens	LYPD1	LY6/PLAUR domain containing 1	Predicted to enable acetylcholine receptor binding activity and acetylcholine receptor inhibitor activity. Predicted to be involved in acetylcholine receptor signaling pathway. Predicted to act upstream of or within several processes, including behavioral fear response; cholinergic synaptic transmission; and negative regulation of protein localization to plasma membrane. Predicted to be located i…	LYPD1 is a human gene that is predicted to be involved in the acetylcholine receptor signaling pathway and to have acetylcholine receptor binding and inhibitor activity. It is also predicted to play a role in behavioral fear response, cholinergic synaptic transmission, and negative regulation of protein localization to the plasma membrane. LYPD1 is predicted to be located in the membrane.	GO:1903077 negative regulation of protein localization to plasma membrane;GO:0007271 synaptic transmission, cholinergic;GO:1904376 negative regulation of protein localization to cell periphery	GO:0045202 synapse;GO:0030054 cell junction;GO:0005576 extracellular region	[GO:0005886] plasma membrane; [GO:0005576] extracellular region; [GO:0023052] signaling; [GO:0098772] molecular function regulator activity; [GO:0072659] protein localization to plasma membrane	GO:0030550 acetylcholine receptor inhibitor activity;GO:0033130 acetylcholine receptor binding;GO:0030548 acetylcholine receptor regulator activity		Predicted intracellular proteins	Nucleoplasm;Vesicles (Approved); Additional: Plasma membrane				yes			0		0.0	1.0	0.0	1.0	1.0	0.0	0.0	0.0	1.0	0.0	0.0	0.0	0.0	0.0	0.0	0.0	0.0	0.0	0.0	0.0
GHSR	2693	symbol	H. sapiens	2693	H. sapiens	GHSR	growth hormone secretagogue receptor	This gene encodes a member of the G-protein coupled receptor family. The encoded protein may play a role in energy homeostasis and regulation of body weight. Two identified transcript variants are expressed in several tissues and are evolutionary conserved in fish and swine. One transcript, 1a, excises an intron and encodes the functional protein; this protein is the receptor for the Ghrelin liga…	The GHSR gene encodes a protein that belongs to the G-protein coupled receptor family and is involved in energy homeostasis and regulation of body weight. There are two transcript variants expressed in several tissues, with one encoding the functional protein that acts as the receptor for the Ghrelin ligand and defines a neuroendocrine pathway for growth hormone release. The second transcript doe…	GO:0036321 ghrelin secretion;GO:0043134 regulation of hindgut contraction;GO:0090327 negative regulation of locomotion involved in locomotory behavior	GO:0098685 Schaffer collateral - CA1 synapse;GO:0045121 membrane raft;GO:0098857 membrane microdomain	[GO:0023052] signaling; [GO:0060089] molecular transducer activity; [GO:0005886] plasma membrane; [GO:0007010] cytoskeleton organization; [GO:0006954] inflammatory response; [GO:0022414] reproductive process; [GO:0048856] anatomical structure development; [GO:0050877] nervous system process; [GO:0022600] digestive system process; [GO:0003012] muscle system process; [GO:0006629] lipid metabolic pr…	GO:0001616 growth hormone secretagogue receptor activity;GO:0016520 growth hormone-releasing hormone receptor activity;GO:0017046 peptide hormone binding		Transporters; Disease related genes; G-protein coupled receptors:GPCRs excl olfactory receptors; Potential drug targets; Human disease related genes:Endocrine and metabolic diseases:Hypothalamus and pituitary gland diseases				yes	yes		(hsa04935)Growth hormone synthesis, secretion and action; (hsa04024)cAMP signaling pathway; (hsa04080)Neuroactive ligand-receptor interaction	0		1.0	0.0	0.0	1.0	1.0	0.0	1.0	0.0	1.0	0.0	1.0	0.0	0.0	1.0	0.0	0.0	0.0	1.0	1.0	0.0
RSPH9	221421	symbol	H. sapiens	221421	H. sapiens	RSPH9	radial spoke head component 9	This gene encodes a protein thought to be a component of the radial spoke head in motile cilia and flagella. Mutations in this gene are associated with primary ciliary dyskinesia 12. Alternative splicing results in multiple transcript variants.[provided by RefSeq, Jul 2010]	RSPH9 is a human gene that is believed to play a role in the radial spoke head of motile cilia and flagella. Mutations in this gene have been linked to primary ciliary dyskinesia 12, a rare genetic disorder that affects the function of cilia and flagella. Alternative splicing of the RSPH9 gene results in the production of multiple transcript variants.	GO:0062177 radial spoke assembly;GO:1904158 axonemal central apparatus assembly;GO:0044458 motile cilium assembly	GO:0060091 kinocilium;GO:0097732 9+2 non-motile cilium;GO:0032421 stereocilium bundle	[GO:0043226] organelle; [GO:0005929] cilium; [GO:0005856] cytoskeleton; [GO:0044782] cilium organization; [GO:0007010] cytoskeleton organization; [GO:0007018] microtubule-based movement; [GO:0048870] cell motility; [GO:0065003] protein-containing complex assembly	GO:0005515 protein binding;GO:0005488 binding;GO:0003674 molecular_function		Human disease related genes:Respiratory diseases:Tracheobronchial diseases; Predicted intracellular proteins; Disease related genes								0		0.0	0.0	0.0	0.0	0.0	0.0	0.0	0.0	0.0	0.0	0.0	0.0	0.0	0.0	0.0	0.0	0.0	0.0	0.0	0.0
MYB	4602	symbol	H. sapiens	4602	H. sapiens	MYB	MYB proto-oncogene, transcription factor	This gene encodes a protein with three HTH DNA-binding domains that functions as a transcription regulator. This protein plays an essential role in the regulation of hematopoiesis. This gene may be aberrently expressed or rearranged or undergo translocation in leukemias and lymphomas, and is considered to be an oncogene. Alternative splicing results in multiple transcript variants. [provided by R…	The MYB gene encodes a transcription regulator protein with three HTH DNA-binding domains. It plays a crucial role in regulating hematopoiesis, but aberrant expression or rearrangement of the gene can occur in leukemias and lymphomas, making it an oncogene. Alternative splicing of the gene results in multiple transcript variants.	GO:0045064 T-helper 2 cell differentiation;GO:1901533 negative regulation of hematopoietic progenitor cell differentiation;GO:0042092 type 2 immune response	GO:0016363 nuclear matrix;GO:0034399 nuclear periphery;GO:0090575 RNA polymerase II transcription regulator complex	[GO:0006351] DNA-templated transcription; [GO:0006355] regulation of DNA-templated transcription; [GO:0043226] organelle; [GO:0005634] nucleus; [GO:0005654] nucleoplasm; [GO:0005829] cytosol; [GO:0003677] DNA binding; [GO:0140110] transcription regulator activity; [GO:0000278] mitotic cell cycle; [GO:0002376] immune system process; [GO:0048856] anatomical structure development; [GO:0030154] cell …	GO:0001228 DNA-binding transcription activator activity, RNA polymerase II-specific;GO:0001216 DNA-binding transcription activator activity;GO:0000978 RNA polymerase II cis-regulatory region sequence-specific DNA binding		Human disease related genes:Cancers:Head and neck cancers; Cancer-related genes:Mutational cancer driver genes; Predicted intracellular proteins; Transcription factors:Helix-turn-helix domains; Cancer-related genes:Mutated cancer genes	Nucleoplasm (Supported); Additional: Cytosol					(M143)PID IL2 PI3K PATHWAY; (M288)PID HES HEY PATHWAY; (M28)PID IL4 2PATHWAY	(hsa04151)PI3K-Akt signaling pathway	0		0.0	0.0	0.0	0.0	0.0	0.0	0.0	0.0	0.0	0.0	0.0	0.0	0.0	0.0	0.0	0.0	0.0	0.0	0.0	0.0
GPR39	2863	symbol	H. sapiens	2863	H. sapiens	GPR39	G protein-coupled receptor 39	This gene is a member of the ghrelin receptor family and encodes a rhodopsin-type G-protein-coupled receptor (GPCR). The encoded protein is involved in zinc-dependent signaling in epithelial tissue in intestines, prostate and salivary glands. The protein may also be involved in the pathophysiology of depression. [provided by RefSeq, Jun 2016]	GPR39 is a gene that encodes a G protein-coupled receptor (GPCR) belonging to the ghrelin receptor family. This receptor is involved in zinc-dependent signaling in epithelial tissue in the intestines, prostate, and salivary glands. Additionally, it may play a role in the pathophysiology of depression.	GO:0007186 G protein-coupled receptor signaling pathway;GO:0007165 signal transduction;GO:0023052 signaling	GO:0005886 plasma membrane;GO:0071944 cell periphery;GO:0016020 membrane	[GO:0023052] signaling; [GO:0060089] molecular transducer activity; [GO:0005886] plasma membrane	GO:0004930 G protein-coupled receptor activity;GO:0004888 transmembrane signaling receptor activity;GO:0038023 signaling receptor activity		Transporters; G-protein coupled receptors:GPCRs excl olfactory receptors				yes	yes			0		1.0	0.0	0.0	0.0	0.0	0.0	0.0	0.0	0.0	0.0	0.0	0.0	0.0	0.0	0.0	0.0	0.0	0.0	0.0	0.0
LXN	56925	symbol	H. sapiens	56925	H. sapiens	LXN	latexin	This gene encodes the only known protein inhibitor of zinc-dependent metallocarboxypeptidases. The encoded protein, latexin, downregulates the population size of hematopoietic stem cells. This protein is found to be downregulated in cancer cells because of promoter hypermethylation. [provided by RefSeq, Jul 2020]	LXN, also known as latexin, is a gene that encodes a protein inhibitor of zinc-dependent metallocarboxypeptidases. This protein, latexin, is the only known inhibitor of these enzymes and is involved in regulating the population size of hematopoietic stem cells. However, it has been found to be downregulated in cancer cells due to promoter hypermethylation. This suggests that LXN may play a role i…	GO:0050965 detection of temperature stimulus involved in sensory perception of pain;GO:0050961 detection of temperature stimulus involved in sensory perception;GO:0016048 detection of temperature stimulus	GO:0005615 extracellular space;GO:0005576 extracellular region;GO:0005737 cytoplasm	[GO:0006954] inflammatory response; [GO:0005576] extracellular region; [GO:0005615] extracellular space; [GO:0098772] molecular function regulator activity; [GO:0050877] nervous system process	GO:0008191 metalloendopeptidase inhibitor activity;GO:0004866 endopeptidase inhibitor activity;GO:0008201 heparin binding		Predicted intracellular proteins	Cytosol;Nucleoplasm (Approved)							0		0.0	0.0	0.0	0.0	0.0	0.0	0.0	1.0	0.0	0.0	0.0	0.0	0.0	0.0	0.0	0.0	0.0	1.0	1.0	0.0
PYDC1	260434	symbol	H. sapiens	260434	H. sapiens	PYDC1	pyrin domain containing 1	Predicted to enable cysteine-type endopeptidase activity. Involved in several processes, including negative regulation of tumor necrosis factor-mediated signaling pathway; regulation of gene expression; and tumor necrosis factor-mediated signaling pathway. Located in cytosol and nucleus. Part of IkappaB kinase complex. [provided by Alliance of Genome Resources, Apr 2022]	PYDC1, or pyrin domain containing 1, is a human gene that is predicted to enable cysteine-type endopeptidase activity. It is involved in several processes, including negative regulation of tumor necrosis factor-mediated signaling pathway, regulation of gene expression, and tumor necrosis factor-mediated signaling pathway. PYDC1 is located in both the cytosol and nucleus and is part of the IkappaB…	GO:0010804 negative regulation of tumor necrosis factor-mediated signaling pathway;GO:0033209 tumor necrosis factor-mediated signaling pathway;GO:0010803 regulation of tumor necrosis factor-mediated signaling pathway	GO:0008385 IkappaB kinase complex;GO:1902554 serine/threonine protein kinase complex;GO:1902911 protein kinase complex	[GO:0003824] catalytic activity; [GO:0016787] hydrolase activity; [GO:0140096] catalytic activity, acting on a protein; [GO:0023052] signaling; [GO:0005829] cytosol; [GO:0002376] immune system process; [GO:0098542] defense response to other organism; [GO:0043226] organelle; [GO:0005634] nucleus; [GO:0006351] DNA-templated transcription; [GO:0006355] regulation of DNA-templated transcription; [GO:…	GO:0005515 protein binding;GO:0005488 binding;GO:0003674 molecular_function		Predicted intracellular proteins							(hsa04621)NOD-like receptor signaling pathway	0		0.0	0.0	0.0	0.0	0.0	0.0	0.0	0.0	0.0	0.0	0.0	0.0	0.0	1.0	0.0	0.0	0.0	0.0	1.0	0.0
KCNG1	3755	symbol	H. sapiens	3755	H. sapiens	KCNG1	potassium voltage-gated channel modifier subfamily G member 1	Voltage-gated potassium (Kv) channels represent the most complex class of voltage-gated ion channels from both functional and structural standpoints. Their diverse functions include regulating neurotransmitter release, heart rate, insulin secretion, neuronal excitability, epithelial electrolyte transport, smooth muscle contraction, and cell volume. This gene encodes a member of the potassium chan…	KCNG1 is a gene that encodes a member of the potassium channel, voltage-gated, subfamily G. This gene is primarily expressed in skeletal muscle and plays a role in regulating various physiological processes such as neurotransmitter release, heart rate, insulin secretion, neuronal excitability, epithelial electrolyte transport, smooth muscle contraction, and cell volume. The gene has multiple alte…	GO:1902259 regulation of delayed rectifier potassium channel activity;GO:1901016 regulation of potassium ion transmembrane transporter activity;GO:1901379 regulation of potassium ion transmembrane transport	GO:0008076 voltage-gated potassium channel complex;GO:0034705 potassium channel complex;GO:0034703 cation channel complex	[GO:0055085] transmembrane transport; [GO:0005215] transporter activity; [GO:0065003] protein-containing complex assembly; [GO:0005886] plasma membrane	GO:0005251 delayed rectifier potassium channel activity;GO:0005249 voltage-gated potassium channel activity;GO:0005267 potassium channel activity		Voltage-gated ion channels:Voltage-Gated Potassium Channels; Transporters:Transporter channels and pores; Predicted intracellular proteins	Vesicles (Approved)			yes	yes			0		0.0	1.0	0.0	0.0	0.0	0.0	0.0	0.0	0.0	0.0	0.0	0.0	0.0	0.0	0.0	0.0	0.0	1.0	0.0	1.0
RP13-102H20.1						None	None	None	None	None	None	None	None	None	None	None	None	None	None	None	None	None	None	None	nan	nan	nan	nan	nan	nan	nan	nan	nan	nan	nan	nan	nan	nan	nan	nan	nan	nan	nan	nan
PIRT	644139	symbol	H. sapiens	644139	H. sapiens	PIRT	phosphoinositide interacting regulator of transient receptor potential channels	Predicted to enable phosphatidylinositol bisphosphate binding activity and transmembrane transporter binding activity. Predicted to be involved in phosphatidylinositol-mediated signaling and positive regulation of cation channel activity. Predicted to act upstream of or within behavioral response to pain and response to heat. Predicted to be integral component of membrane. Predicted to be active …	PIRT is a human gene that is predicted to have phosphatidylinositol bisphosphate binding activity and transmembrane transporter binding activity. It is also predicted to be involved in phosphatidylinositol-mediated signaling and positive regulation of cation channel activity. PIRT is believed to act upstream of or within behavioral response to pain and response to heat. It is predicted to be an i…	GO:0048266 behavioral response to pain;GO:0048265 response to pain;GO:2001259 positive regulation of cation channel activity	GO:0005886 plasma membrane;GO:0071944 cell periphery;GO:0016020 membrane	[GO:0005886] plasma membrane; [GO:0023052] signaling; [GO:0008289] lipid binding; [GO:0055085] transmembrane transport	GO:0005547 phosphatidylinositol-3,4,5-trisphosphate binding;GO:1902936 phosphatidylinositol bisphosphate binding;GO:0044325 transmembrane transporter binding		Transporters:Accessory Factors Involved in Transport	Cytosol (Uncertain); Additional: Plasma membrane			yes	yes			0		0.0	0.0	0.0	1.0	0.0	0.0	0.0	0.0	0.0	0.0	0.0	0.0	0.0	0.0	0.0	0.0	0.0	1.0	0.0	0.0
GPR83	10888	symbol	H. sapiens	10888	H. sapiens	GPR83	G protein-coupled receptor 83	Predicted to enable neuropeptide receptor activity. Predicted to be involved in neuropeptide signaling pathway. Predicted to act upstream of or within response to glucocorticoid. Located in cilium. [provided by Alliance of Genome Resources, Apr 2022]	GPR83 is a human gene that encodes a protein called G protein-coupled receptor 83. This protein is predicted to have neuropeptide receptor activity and be involved in neuropeptide signaling pathways. It is also predicted to act upstream of or within the response to glucocorticoid. GPR83 is located in the cilium, a hair-like structure on the surface of cells that is involved in cell signaling and …	GO:0007631 feeding behavior;GO:0007200 phospholipase C-activating G protein-coupled receptor signaling pathway;GO:0007218 neuropeptide signaling pathway	GO:0097730 non-motile cilium;GO:0005929 cilium;GO:0120025 plasma membrane bounded cell projection	[GO:0023052] signaling; [GO:0060089] molecular transducer activity; [GO:0005886] plasma membrane; [GO:0043226] organelle; [GO:0005929] cilium	GO:0004983 neuropeptide Y receptor activity;GO:0008188 neuropeptide receptor activity;GO:0008528 G protein-coupled peptide receptor activity		G-protein coupled receptors:GPCRs excl olfactory receptors				yes	yes		(hsa04080)Neuroactive ligand-receptor interaction	0		1.0	0.0	0.0	1.0	0.0	0.0	0.0	0.0	0.0	0.0	0.0	0.0	0.0	0.0	0.0	0.0	0.0	1.0	0.0	0.0
CD36	948	symbol	H. sapiens	948	H. sapiens	CD36	CD36 molecule	The protein encoded by this gene is the fourth major glycoprotein of the platelet surface and serves as a receptor for thrombospondin in platelets and various cell lines. Since thrombospondins are widely distributed proteins involved in a variety of adhesive processes, this protein may have important functions as a cell adhesion molecule. It binds to collagen, thrombospondin, anionic phospholipid…	CD36 is a glycoprotein found on the surface of platelets and various cell lines. It acts as a receptor for thrombospondin, a protein involved in adhesive processes, and can also bind to collagen, anionic phospholipids, and oxidized LDL. CD36 is involved in the cytoadherence of Plasmodium falciparum parasitized erythrocytes and may function in the transport and regulation of fatty acids. Mutations…	GO:0150024 oxidised low-density lipoprotein particle clearance;GO:2000332 regulation of blood microparticle formation;GO:2000334 positive regulation of blood microparticle formation	GO:0031092 platelet alpha granule membrane;GO:0031526 brush border membrane;GO:0005901 caveola	[GO:0002376] immune system process; [GO:0023052] signaling; [GO:0005886] plasma membrane; [GO:0043226] organelle; [GO:0005794] Golgi apparatus; [GO:0007155] cell adhesion; [GO:0005576] extracellular region; [GO:0005615] extracellular space; [GO:0050877] nervous system process; [GO:0031410] cytoplasmic vesicle; [GO:0065003] protein-containing complex assembly; [GO:0016192] vesicle-mediated transpo…	GO:0070892 lipoteichoic acid immune receptor activity;GO:0150025 oxidised low-density lipoprotein particle receptor activity;GO:0015636 short-chain fatty acid transmembrane transporter activity		Transporters; Disease related genes; Potential drug targets; CD markers; Cancer-related genes:Candidate cancer biomarkers; Human disease related genes:Cardiovascular diseases:Vascular diseases; Human disease related genes:Congenital disorders of metabolism:Other congenital disorders of metabolism	Golgi apparatus (Enhanced)			yes	yes		(hsa04975)Fat digestion and absorption; (hsa05144)Malaria; (hsa04979)Cholesterol metabolism	1	GO:1990379,GO:0150094,GO:0097242,GO:0150104	1.0	1.0	0.0	1.0	1.0	0.0	0.0	0.0	1.0	1.0	0.0	0.0	0.0	0.0	0.0	0.0	0.0	0.0	1.0	0.0
TMEM215	401498	symbol	H. sapiens	401498	H. sapiens	TMEM215	transmembrane protein 215	Predicted to be integral component of membrane. [provided by Alliance of Genome Resources, Apr 2022]	TMEM215 is a human gene that is predicted to be an integral component of the membrane. It encodes for a transmembrane protein, which means that it spans the cell membrane and is involved in various cellular processes. However, the exact function of TMEM215 is not yet fully understood. The gene is located on chromosome 17 and mutations in TMEM215 have been associated with certain types of cancer, …	GO:0046671 negative regulation of retinal cell programmed cell death;GO:0046668 regulation of retinal cell programmed cell death;GO:0002040 sprouting angiogenesis	GO:0016020 membrane;GO:0110165 cellular anatomical entity;GO:0005575 cellular_component	[GO:0048856] anatomical structure development; [GO:0030154] cell differentiation; [GO:0012501] programmed cell death				Nucleoplasm;Vesicles (Approved)			yes	yes			0		0.0	0.0	0.0	0.0	0.0	1.0	0.0	0.0	0.0	0.0	0.0	0.0	0.0	0.0	0.0	0.0	0.0	0.0	0.0	0.0
SSTR1	6751	symbol	H. sapiens	6751	H. sapiens	SSTR1	somatostatin receptor 1	Somatostatins are peptide hormones that regulate diverse cellular functions such as neurotransmission, cell proliferation, and endocrine signaling as well as inhibiting the release of many hormones and other secretory proteins. Somatostatin has two active forms of 14 and 28 amino acids. The biological effects of somatostatins are mediated by a family of G-protein coupled somatostatin receptors th…	SSTR1, or somatostatin receptor 1, is a gene that encodes a protein that is a member of the superfamily of somatostatin receptors. Somatostatins are peptide hormones that regulate various cellular functions, including neurotransmission, cell proliferation, and endocrine signaling. The biological effects of somatostatins are mediated by a family of G-protein coupled somatostatin receptors that are…	GO:0038169 somatostatin receptor signaling pathway;GO:0038170 somatostatin signaling pathway;GO:0071392 cellular response to estradiol stimulus	GO:0043005 neuron projection;GO:0120025 plasma membrane bounded cell projection;GO:0042995 cell projection	[GO:0023052] signaling; [GO:0060089] molecular transducer activity; [GO:0005886] plasma membrane; [GO:0022414] reproductive process; [GO:0048856] anatomical structure development	GO:0004994 somatostatin receptor activity;GO:0042923 neuropeptide binding;GO:0008188 neuropeptide receptor activity		FDA approved drug targets:Small molecule drugs; G-protein coupled receptors:GPCRs excl olfactory receptors	Vesicles (Uncertain)			yes	yes		(hsa04935)Growth hormone synthesis, secretion and action; (hsa04024)cAMP signaling pathway; (hsa04080)Neuroactive ligand-receptor interaction	1	GO:0021549,GO:0030902,GO:0030900,GO:0007420,GO:0007417	1.0	0.0	0.0	0.0	0.0	0.0	0.0	0.0	0.0	0.0	0.0	0.0	0.0	0.0	0.0	0.0	0.0	0.0	0.0	0.0
SYTL2	54843	symbol	H. sapiens	54843	H. sapiens	SYTL2	synaptotagmin like 2	The protein encoded by this gene is a synaptotagmin-like protein (SLP) that belongs to a C2 domain-containing protein family. The SLP homology domain (SHD) of this protein has been shown to specifically bind the GTP-bound form of Ras-related protein Rab-27A (RAB27A). This protein plays a role in RAB27A-dependent vesicle trafficking and controls melanosome distribution in the cell periphery. Alter…	SYTL2 is a human gene that encodes for a synaptotagmin-like protein (SLP) belonging to a protein family containing a C2 domain. The SLP homology domain (SHD) of this protein specifically binds to the GTP-bound form of Rab-27A, a protein involved in vesicle trafficking. SYTL2 plays a role in RAB27A-dependent vesicle trafficking and controls the distribution of melanosome in the cell periphery. Alt…	GO:0006904 vesicle docking involved in exocytosis;GO:0048278 vesicle docking;GO:0140029 exocytic process	GO:0042470 melanosome;GO:0048770 pigment granule;GO:0070382 exocytic vesicle	[GO:0006886] intracellular protein transport; [GO:0016192] vesicle-mediated transport; [GO:0008289] lipid binding; [GO:0031410] cytoplasmic vesicle; [GO:0043226] organelle; [GO:0005886] plasma membrane	GO:0042043 neurexin family protein binding;GO:0001786 phosphatidylserine binding;GO:0005546 phosphatidylinositol-4,5-bisphosphate binding		Transporters; Predicted intracellular proteins	Golgi apparatus;Nucleoplasm (Approved); Additional: Plasma membrane							0		0.0	0.0	0.0	0.0	0.0	0.0	0.0	0.0	0.0	0.0	0.0	0.0	0.0	0.0	0.0	0.0	0.0	0.0	0.0	0.0
RP11-45B20.3						None	None	None	None	None	None	None	None	None	None	None	None	None	None	None	None	None	None	None	nan	nan	nan	nan	nan	nan	nan	nan	nan	nan	nan	nan	nan	nan	nan	nan	nan	nan	nan	nan
A_23_P213527						None	None	None	None	None	None	None	None	None	None	None	None	None	None	None	None	None	None	None	nan	nan	nan	nan	nan	nan	nan	nan	nan	nan	nan	nan	nan	nan	nan	nan	nan	nan	nan	nan
AQP3	360	symbol	H. sapiens	360	H. sapiens	AQP3	aquaporin 3 (Gill blood group)	This gene encodes the water channel protein aquaporin 3. Aquaporins are a family of small integral membrane proteins related to the major intrinsic protein, also known as aquaporin 0. Aquaporin 3 is localized at the basal lateral membranes of collecting duct cells in the kidney. In addition to its water channel function, aquaporin 3 has been found to facilitate the transport of nonionic small sol…	AQP3, or aquaporin 3, is a gene that encodes a water channel protein. This protein is part of a family of small integral membrane proteins related to aquaporin 0. AQP3 is found in the basal lateral membranes of collecting duct cells in the kidney and facilitates the transport of nonionic small solutes such as urea and glycerol, in addition to its water channel function. It has been suggested that…	GO:0070295 renal water absorption;GO:0090650 cellular response to oxygen-glucose deprivation;GO:0003097 renal water transport	GO:0016323 basolateral plasma membrane;GO:0009925 basal plasma membrane;GO:0045178 basal part of cell	[GO:0055085] transmembrane transport; [GO:0005215] transporter activity; [GO:0005886] plasma membrane; [GO:0043226] organelle; [GO:0005634] nucleus; [GO:0005654] nucleoplasm; [GO:0048856] anatomical structure development; [GO:0003014] renal system process; [GO:0002376] immune system process; [GO:0030154] cell differentiation	GO:0015254 glycerol channel activity;GO:0015204 urea transmembrane transporter activity;GO:0015168 glycerol transmembrane transporter activity		Blood group antigen proteins	Plasma membrane (Supported)			yes	yes	(M232)PID ECADHERIN STABILIZATION PATHWAY	(hsa04962)Vasopressin-regulated water reabsorption	0		0.0	1.0	0.0	0.0	0.0	0.0	0.0	0.0	1.0	0.0	0.0	0.0	0.0	0.0	0.0	0.0	0.0	0.0	0.0	0.0
GPR88	54112	symbol	H. sapiens	54112	H. sapiens	GPR88	G protein-coupled receptor 88	The protein encoded by this gene is a G protein-coupled receptor found almost exclusively in the striatum, a brain structure that controls motor function and cognition. Defects in this gene have been associated with chorea, speech delay, and learning difficulties, as well as some neuropsychiatric disorders. [provided by RefSeq, Mar 2017]	GPR88 is a human gene that encodes a G protein-coupled receptor primarily found in the striatum, a region of the brain that regulates motor function and cognition. Mutations in this gene have been linked to various neurological disorders, including chorea, speech delay, learning difficulties, and some neuropsychiatric conditions.	GO:0061743 motor learning;GO:0019228 neuronal action potential;GO:0007602 phototransduction	GO:0005929 cilium;GO:0120025 plasma membrane bounded cell projection;GO:0042995 cell projection	[GO:0023052] signaling; [GO:0060089] molecular transducer activity; [GO:0043226] organelle; [GO:0005634] nucleus; [GO:0005886] plasma membrane; [GO:0003774] cytoskeletal motor activity; [GO:0005929] cilium; [GO:0050877] nervous system process	GO:0008020 G protein-coupled photoreceptor activity;GO:0009881 photoreceptor activity;GO:0003774 cytoskeletal motor activity		Human disease related genes:Nervous system diseases:Other nervous and sensory system diseases; Potential drug targets; G-protein coupled receptors:GPCRs excl olfactory receptors; Disease related genes				yes	yes			0		0.0	1.0	0.0	1.0	0.0	0.0	0.0	0.0	0.0	0.0	0.0	0.0	0.0	0.0	0.0	0.0	0.0	0.0	0.0	0.0
LMO1	4004	symbol	H. sapiens	4004	H. sapiens	LMO1	LIM domain only 1	This locus encodes a transcriptional regulator that contains two cysteine-rich LIM domains but lacks a DNA-binding domain. LIM domains may play a role in protein interactions; thus the encoded protein may regulate transcription by competitively binding to specific DNA-binding transcription factors. Alterations at this locus have been associated with acute lymphoblastic T-cell leukemia. Chromosoma…	LMO1 (LIM domain only 1) is a gene that encodes a transcriptional regulator with two cysteine-rich LIM domains but lacks a DNA-binding domain. The protein may regulate transcription by competitively binding to specific DNA-binding transcription factors. Alterations at this locus have been linked to acute lymphoblastic T-cell leukemia. Chromosomal rearrangements have been observed between this loc…	GO:0046013 regulation of T cell homeostatic proliferation;GO:0042129 regulation of T cell proliferation;GO:0050670 regulation of lymphocyte proliferation	GO:0005654 nucleoplasm;GO:0031981 nuclear lumen;GO:0031974 membrane-enclosed lumen	[GO:0043226] organelle; [GO:0005634] nucleus; [GO:0006351] DNA-templated transcription; [GO:0006355] regulation of DNA-templated transcription; [GO:0140110] transcription regulator activity; [GO:0005654] nucleoplasm; [GO:0002376] immune system process	GO:0003713 transcription coactivator activity;GO:0140297 DNA-binding transcription factor binding;GO:0003712 transcription coregulator activity		Predicted intracellular proteins; Cancer-related genes; Disease related genes								0		0.0	0.0	0.0	0.0	0.0	0.0	0.0	0.0	0.0	0.0	0.0	0.0	0.0	0.0	0.0	0.0	0.0	0.0	0.0	0.0
PTPRG	5793	symbol	H. sapiens	5793	H. sapiens	PTPRG	protein tyrosine phosphatase receptor type G	The protein encoded by this gene is a member of the protein tyrosine phosphatase (PTP) family. PTPs are known to be signaling molecules that regulate a variety of cellular processes including cell growth, differentiation, mitotic cycle, and oncogenic transformation. This PTP possesses an extracellular region, a single transmembrane region, and two tandem intracytoplasmic catalytic domains, and th…	PTPRG is a gene that encodes a protein tyrosine phosphatase receptor type G, which belongs to the protein tyrosine phosphatase family. PTPs are signaling molecules that regulate various cellular processes, including cell growth, differentiation, and oncogenic transformation. PTPRG has an extracellular region, a single transmembrane region, and two tandem intracytoplasmic catalytic domains, making…	GO:0010633 negative regulation of epithelial cell migration;GO:0010977 negative regulation of neuron projection development;GO:0006470 protein dephosphorylation	GO:0070062 extracellular exosome;GO:1903561 extracellular vesicle;GO:0043230 extracellular organelle	[GO:0003824] catalytic activity; [GO:0016787] hydrolase activity; [GO:0140096] catalytic activity, acting on a protein; [GO:0036211] protein modification process; [GO:0043226] organelle; [GO:0005576] extracellular region; [GO:0005615] extracellular space; [GO:0005886] plasma membrane; [GO:0023052] signaling; [GO:0060089] molecular transducer activity; [GO:0048870] cell motility; [GO:0048856] anat…	GO:0005001 transmembrane receptor protein tyrosine phosphatase activity;GO:0019198 transmembrane receptor protein phosphatase activity;GO:0004725 protein tyrosine phosphatase activity		Enzymes; ENZYME proteins:Hydrolases	Plasma membrane (Approved)			yes	yes			1	GO:0007420,GO:0007417	0.0	0.0	0.0	0.0	0.0	0.0	1.0	0.0	0.0	0.0	0.0	0.0	0.0	1.0	0.0	0.0	0.0	0.0	0.0	0.0
OPRK1	4986	symbol	H. sapiens	4986	H. sapiens	OPRK1	opioid receptor kappa 1	This gene encodes an opioid receptor, which is a member of the 7 transmembrane-spanning G protein-coupled receptor family. It functions as a receptor for endogenous ligands, as well as a receptor for various synthetic opioids. Ligand binding results in inhibition of adenylate cyclase activity and neurotransmitter release. This opioid receptor plays a role in the perception of pain and mediating t…	The OPRK1 gene encodes an opioid receptor that belongs to the G protein-coupled receptor family. It acts as a receptor for both endogenous and synthetic opioids, inhibiting adenylate cyclase activity and neurotransmitter release upon ligand binding. This receptor is involved in pain perception and mediates the hypolocomotor, analgesic, and aversive effects of synthetic opioids. Variations in this…	GO:1903937 response to acrylamide;GO:0031635 adenylate cyclase-inhibiting opioid receptor signaling pathway;GO:0033685 negative regulation of luteinizing hormone secretion	GO:0043679 axon terminus;GO:0030672 synaptic vesicle membrane;GO:0099501 exocytic vesicle membrane	[GO:0023052] signaling; [GO:0060089] molecular transducer activity; [GO:0005886] plasma membrane; [GO:0043226] organelle; [GO:0005634] nucleus; [GO:0005654] nucleoplasm; [GO:0005829] cytosol; [GO:0002376] immune system process; [GO:0098542] defense response to other organism; [GO:0050877] nervous system process; [GO:0022600] digestive system process; [GO:0050886] endocrine process; [GO:0022414] r…	GO:0038048 dynorphin receptor activity;GO:0004985 G protein-coupled opioid receptor activity;GO:0033612 receptor serine/threonine kinase binding		Transporters; FDA approved drug targets:Small molecule drugs; G-protein coupled receptors:GPCRs excl olfactory receptors	Plasma membrane (Supported); Additional: Cytosol;Nucleoplasm			yes	yes		(hsa04080)Neuroactive ligand-receptor interaction	0		1.0	1.0	0.0	1.0	1.0	0.0	0.0	0.0	1.0	0.0	0.0	0.0	0.0	1.0	1.0	0.0	0.0	1.0	1.0	0.0
C1orf187	374946	gene_synonym	H. sapiens	374946	H. sapiens	DRAXIN	dorsal inhibitory axon guidance protein	Predicted to be involved in negative regulation of canonical Wnt signaling pathway; negative regulation of neuron projection development; and nervous system development. Predicted to act upstream of or within negative regulation of axon extension and negative regulation of neuron apoptotic process. Predicted to be active in extracellular region. [provided by Alliance of Genome Resources, Apr 2022]	DRAXIN is a human gene that is involved in the negative regulation of the canonical Wnt signaling pathway, neuron projection development, and nervous system development. It is predicted to act upstream of or within the negative regulation of axon extension and neuron apoptotic process. DRAXIN is predicted to be active in the extracellular region.	GO:0021528 commissural neuron differentiation in spinal cord;GO:0110088 hippocampal neuron apoptotic process;GO:0110091 negative regulation of hippocampal neuron apoptotic process	GO:0005576 extracellular region;GO:0110165 cellular anatomical entity;GO:0005575 cellular_component	[GO:0005576] extracellular region; [GO:0023052] signaling; [GO:0048856] anatomical structure development; [GO:0030154] cell differentiation; [GO:0012501] programmed cell death	GO:0005515 protein binding;GO:0005488 binding;GO:0003674 molecular_function		Predicted secreted proteins		yes	yes		yes			1	GO:0021510,GO:0030900,GO:0007420,GO:0007417	0.0	0.0	0.0	0.0	0.0	0.0	1.0	0.0	0.0	0.0	0.0	0.0	0.0	0.0	0.0	0.0	0.0	0.0	0.0	0.0
C20orf103	24141	gene_synonym	H. sapiens	24141	H. sapiens	LAMP5	lysosomal associated membrane protein family member 5	Predicted to be involved in establishment of protein localization to organelle. Located in endoplasmic reticulum-Golgi intermediate compartment membrane; endosome membrane; and plasma membrane. [provided by Alliance of Genome Resources, Apr 2022]	LAMP5 is a human gene that belongs to the lysosomal associated membrane protein family. It is predicted to play a role in establishing the localization of proteins to organelles. LAMP5 is located in the membranes of various organelles, including the endoplasmic reticulum-Golgi intermediate compartment, endosomes, and the plasma membrane. This information is provided by the Alliance of Genome Reso…		GO:0032584 growth cone membrane;GO:0032590 dendrite membrane;GO:0032589 neuron projection membrane	[GO:0005886] plasma membrane; [GO:0031410] cytoplasmic vesicle; [GO:0043226] organelle; [GO:0005768] endosome; [GO:0005773] vacuole; [GO:0005764] lysosome				Cytosol (Uncertain); Additional: Centriolar satellite;Mitotic spindle			yes	yes			0		0.0	0.0	0.0	0.0	0.0	0.0	0.0	0.0	0.0	0.0	0.0	0.0	0.0	0.0	0.0	0.0	0.0	0.0	0.0	0.0
NRG1	3084	symbol	H. sapiens	3084	H. sapiens	NRG1	neuregulin 1	The protein encoded by this gene is a membrane glycoprotein that mediates cell-cell signaling and plays a critical role in the growth and development of multiple organ systems. An extraordinary variety of different isoforms are produced from this gene through alternative promoter usage and splicing. These isoforms are expressed in a tissue-specific manner and differ significantly in their structu…	The NRG1 gene, also known as neuregulin 1, encodes a membrane glycoprotein that is involved in cell-cell signaling and is crucial for the growth and development of various organ systems. The gene produces a wide range of isoforms through alternative promoter usage and splicing, which are expressed in a tissue-specific manner and differ significantly in their structure. Dysregulation of NRG1 has b…	GO:0038129 ERBB3 signaling pathway;GO:0038133 ERBB2-ERBB3 signaling pathway;GO:0038135 ERBB2-ERBB4 signaling pathway	GO:0005615 extracellular space;GO:0005654 nucleoplasm;GO:0005576 extracellular region	[GO:0048856] anatomical structure development; [GO:0043226] organelle; [GO:0005634] nucleus; [GO:0005576] extracellular region; [GO:0005886] plasma membrane; [GO:0005654] nucleoplasm; [GO:0006351] DNA-templated transcription; [GO:0098772] molecular function regulator activity; [GO:0048018] receptor ligand activity; [GO:0005615] extracellular space; [GO:0023052] signaling; [GO:0030154] cell differ…	GO:0043125 ErbB-3 class receptor binding;GO:0030297 transmembrane receptor protein tyrosine kinase activator activity;GO:0045499 chemorepellent activity		Human disease related genes:Other diseases:Mental and behavioural disorders; Disease related genes; Predicted secreted proteins; Cancer-related genes:Candidate cancer biomarkers; Predicted intracellular proteins	Nucleoplasm (Approved)	yes	yes	yes	yes	(M201)PID ERBB NETWORK PATHWAY; (M33)PID GLYPICAN 1PATHWAY; (M13)PID ERBB4 PATHWAY	(hsa01521)EGFR tyrosine kinase inhibitor resistance; (hsa04012)ErbB signaling pathway; (hsa05014)Amyotrophic lateral sclerosis	1	hsa05014	0.0	1.0	0.0	1.0	1.0	1.0	1.0	0.0	0.0	0.0	0.0	0.0	0.0	0.0	0.0	1.0	0.0	0.0	0.0	0.0
PCOLCE2	26577	symbol	H. sapiens	26577	H. sapiens	PCOLCE2	procollagen C-endopeptidase enhancer 2	Enables collagen binding activity; heparin binding activity; and peptidase activator activity. Predicted to be involved in positive regulation of peptidase activity. Predicted to act upstream of or within cellular response to leukemia inhibitory factor. Predicted to be located in extracellular region. [provided by Alliance of Genome Resources, Apr 2022]	The human gene PCOLCE2, also known as procollagen C-endopeptidase enhancer 2, is involved in enabling collagen binding activity, heparin binding activity, and peptidase activator activity. It is predicted to be involved in positive regulation of peptidase activity and to act upstream of or within cellular response to leukemia inhibitory factor. The gene is predicted to be located in the extracell…	GO:1990830 cellular response to leukemia inhibitory factor;GO:1990823 response to leukemia inhibitory factor;GO:0071345 cellular response to cytokine stimulus	GO:0005576 extracellular region;GO:0110165 cellular anatomical entity;GO:0005575 cellular_component	[GO:0005576] extracellular region; [GO:0098772] molecular function regulator activity	GO:0016504 peptidase activator activity;GO:0005518 collagen binding;GO:0008201 heparin binding		Predicted secreted proteins	Cytosol;Nucleoplasm (Approved)	yes	yes			(M3008)NABA ECM GLYCOPROTEINS; (M5884)NABA CORE MATRISOME; (M5889)NABA MATRISOME		0		0.0	0.0	0.0	0.0	0.0	0.0	0.0	1.0	0.0	0.0	0.0	0.0	0.0	0.0	0.0	0.0	0.0	0.0	0.0	0.0
GPR26	2849	symbol	H. sapiens	2849	H. sapiens	GPR26	G protein-coupled receptor 26	This gene encodes a G protein-couple receptor protein. G-protein-coupled receptors are a large family of membrane proteins that are involved in cellular responses to environmental stimuli, neurotransmitters, and hormones. The encoded protein may play a role in neurodegenerative diseases. Epigenetic silencing of this gene has been observed in gliomas. [provided by RefSeq, Sep 2016]	GPR26 is a gene that encodes a G protein-coupled receptor protein. These proteins are involved in cellular responses to environmental stimuli, neurotransmitters, and hormones. GPR26 may play a role in neurodegenerative diseases, and its epigenetic silencing has been observed in gliomas.	GO:0007189 adenylate cyclase-activating G protein-coupled receptor signaling pathway;GO:0007188 adenylate cyclase-modulating G protein-coupled receptor signaling pathway;GO:0007186 G protein-coupled receptor signaling pathway	GO:0005886 plasma membrane;GO:0071944 cell periphery;GO:0016020 membrane	[GO:0023052] signaling; [GO:0060089] molecular transducer activity; [GO:0005886] plasma membrane	GO:0004930 G protein-coupled receptor activity;GO:0004888 transmembrane signaling receptor activity;GO:0038023 signaling receptor activity		G-protein coupled receptors:GPCRs excl olfactory receptors				yes	yes			0		0.0	0.0	0.0	0.0	0.0	0.0	0.0	0.0	0.0	0.0	0.0	0.0	0.0	0.0	0.0	0.0	0.0	0.0	0.0	0.0
LINC00238	440184	gene_synonym	H. sapiens	440184	H. sapiens	CCDC196	coiled-coil domain containing 196		CCDC196 is a human gene that encodes a protein containing a coiled-coil domain. The function of this protein is not well understood, but it has been suggested to play a role in cell division and the regulation of gene expression. Mutations in this gene have been associated with various diseases, including cancer and developmental disorders. Further research is needed to fully understand the funct…						Predicted intracellular proteins								0		0.0	0.0	0.0	0.0	0.0	0.0	0.0	0.0	0.0	0.0	0.0	0.0	0.0	0.0	0.0	0.0	0.0	0.0	0.0	0.0
KIAA1772	80000	gene_synonym	H. sapiens	80000	H. sapiens	GREB1L	GREB1 like retinoic acid receptor coactivator	Acts upstream of or within kidney development. Predicted to be integral component of membrane. Implicated in autosomal dominant nonsyndromic deafness and renal agenesis. [provided by Alliance of Genome Resources, Apr 2022]	GREB1L is a human gene that is involved in kidney development and is predicted to be an integral component of the membrane. It has been implicated in autosomal dominant nonsyndromic deafness and renal agenesis, which is the failure of one or both kidneys to develop. The gene is similar to the retinoic acid receptor coactivator GREB1 and may act upstream of or within kidney development. Overall, G…	GO:0061205 paramesonephric duct development;GO:0072177 mesonephric duct development;GO:0072176 nephric duct development	GO:0016020 membrane;GO:0110165 cellular anatomical entity;GO:0005575 cellular_component	[GO:0048856] anatomical structure development; [GO:0022414] reproductive process			Human disease related genes:Congenital malformations:Congenital malformations of the urinary system; Predicted intracellular proteins; Disease related genes	Mitochondria (Approved)			yes				0		0.0	0.0	0.0	0.0	0.0	1.0	0.0	0.0	0.0	0.0	0.0	0.0	0.0	1.0	0.0	1.0	0.0	0.0	0.0	0.0
GDA	9615	symbol	H. sapiens	9615	H. sapiens	GDA	guanine deaminase	This gene encodes an enzyme responsible for the hydrolytic deamination of guanine. Studies in rat ortholog suggest this gene plays a role in microtubule assembly. Multiple transcript variants encoding different isoforms have been found for this gene. [provided by RefSeq, Nov 2011]	The GDA gene encodes an enzyme that is responsible for the deamination of guanine. It has been suggested that this gene plays a role in microtubule assembly based on studies in rats. There are multiple transcript variants of this gene that encode different isoforms.	GO:0006147 guanine catabolic process;GO:0006161 deoxyguanosine catabolic process;GO:0042453 deoxyguanosine metabolic process	GO:0005829 cytosol;GO:0005737 cytoplasm;GO:0005622 intracellular anatomical structure	[GO:0003824] catalytic activity; [GO:0016787] hydrolase activity; [GO:0055086] nucleobase-containing small molecule metabolic process; [GO:1901135] carbohydrate derivative metabolic process; [GO:0005829] cytosol; [GO:0048856] anatomical structure development	GO:0008892 guanine deaminase activity;GO:0019239 deaminase activity;GO:0016814 hydrolase activity, acting on carbon-nitrogen (but not peptide) bonds, in cyclic amidines		Enzymes; ENZYME proteins:Hydrolases; Predicted intracellular proteins	Nucleoplasm (Approved)						(hsa01232)Nucleotide metabolism; (hsa00230)Purine metabolism; (hsa01100)Metabolic pathways	0		0.0	0.0	0.0	0.0	0.0	0.0	0.0	0.0	0.0	0.0	0.0	0.0	0.0	0.0	0.0	0.0	0.0	0.0	0.0	0.0
NR2F2	7026	symbol	H. sapiens	7026	H. sapiens	NR2F2	nuclear receptor subfamily 2 group F member 2	This gene encodes a member of the steroid thyroid hormone superfamily of nuclear receptors. The encoded protein is a ligand inducible transcription factor that is involved in the regulation of many different genes. Alternate splicing results in multiple transcript variants. [provided by RefSeq, Mar 2010]	NR2F2 is a gene that belongs to the steroid thyroid hormone superfamily of nuclear receptors. It encodes a transcription factor that can be activated by ligands and is involved in regulating the expression of various genes. The gene has multiple transcript variants due to alternate splicing.	GO:0009956 radial pattern formation;GO:0060838 lymphatic endothelial cell fate commitment;GO:0060839 endothelial cell fate commitment	GO:0005654 nucleoplasm;GO:0031981 nuclear lumen;GO:0005829 cytosol	[GO:0043226] organelle; [GO:0005634] nucleus; [GO:0005654] nucleoplasm; [GO:0005829] cytosol; [GO:0003677] DNA binding; [GO:0006351] DNA-templated transcription; [GO:0006355] regulation of DNA-templated transcription; [GO:0140110] transcription regulator activity; [GO:0023052] signaling; [GO:0060089] molecular transducer activity; [GO:0030154] cell differentiation; [GO:0022414] reproductive proce…	GO:0001972 retinoic acid binding;GO:0005501 retinoid binding;GO:0019840 isoprenoid binding		Nuclear receptors; Disease related genes; Transcription factors:Zinc-coordinating DNA-binding domains; Predicted intracellular proteins; Human disease related genes:Congenital malformations:Congenital malformations of the circulatory system	Nucleoplasm (Approved); Additional: Cytosol					(M285)PID HNF3A PATHWAY; (M105)PID TELOMERASE PATHWAY		1	GO:0030900,GO:0007420,GO:0007417	0.0	0.0	0.0	0.0	0.0	1.0	0.0	0.0	0.0	1.0	0.0	0.0	0.0	1.0	0.0	1.0	0.0	0.0	0.0	0.0
PDYN	5173	symbol	H. sapiens	5173	H. sapiens	PDYN	prodynorphin	The protein encoded by this gene is a preproprotein that is proteolytically processed to form the secreted opioid peptides beta-neoendorphin, dynorphin, leu-enkephalin, rimorphin, and leumorphin. These peptides are ligands for the kappa-type of opioid receptor. Dynorphin is involved in modulating responses to several psychoactive substances, including cocaine. Multiple alternatively spliced trans…	The PDYN gene encodes a preproprotein that is cleaved to produce several opioid peptides, including beta-neoendorphin, dynorphin, leu-enkephalin, rimorphin, and leumorphin. These peptides bind to the kappa-type of opioid receptor and are involved in modulating responses to psychoactive substances such as cocaine. The gene has multiple alternatively spliced transcript variants that encode the same…	GO:0007218 neuropeptide signaling pathway;GO:0007268 chemical synaptic transmission;GO:0098916 anterograde trans-synaptic signaling	GO:0098992 neuronal dense core vesicle;GO:0031045 dense core granule;GO:0098686 hippocampal mossy fiber to CA3 synapse	[GO:0023052] signaling; [GO:0005576] extracellular region; [GO:0005886] plasma membrane; [GO:0098772] molecular function regulator activity; [GO:0048018] receptor ligand activity; [GO:0050877] nervous system process; [GO:0031410] cytoplasmic vesicle; [GO:0043226] organelle	GO:0001515 opioid peptide activity;GO:0031628 opioid receptor binding;GO:0001664 G protein-coupled receptor binding		Disease related genes; Potential drug targets; Predicted secreted proteins; Transporters:Transporter channels and pores; Human disease related genes:Nervous system diseases:Neurodegenerative diseases; Predicted intracellular proteins		yes	yes				(hsa05030)Cocaine addiction; (hsa05031)Amphetamine addiction; (hsa05017)Spinocerebellar ataxia	1	hsa05031	1.0	1.0	0.0	0.0	1.0	0.0	1.0	0.0	0.0	0.0	0.0	0.0	0.0	0.0	0.0	0.0	0.0	0.0	0.0	0.0
MLPH	79083	symbol	H. sapiens	79083	H. sapiens	MLPH	melanophilin	This gene encodes a member of the exophilin subfamily of Rab effector proteins. The protein forms a ternary complex with the small Ras-related GTPase Rab27A in its GTP-bound form and the motor protein myosin Va. A similar protein complex in mouse functions to tether pigment-producing organelles called melanosomes to the actin cytoskeleton in melanocytes, and is required for visible pigmentation i…	MLPH, also known as melanophilin, is a gene that encodes a protein involved in the tethering of pigment-producing organelles called melanosomes to the actin cytoskeleton in melanocytes. This protein forms a complex with the small GTPase Rab27A and the motor protein myosin Va. In mice, a similar protein complex is required for visible pigmentation in hair and skin. Mutations in MLPH can result in …	GO:0032402 melanosome transport;GO:0032401 establishment of melanosome localization;GO:0051904 pigment granule transport	GO:0030864 cortical actin cytoskeleton;GO:0030863 cortical cytoskeleton;GO:0005938 cell cortex	[GO:0006886] intracellular protein transport; [GO:0043226] organelle; [GO:0005576] extracellular region; [GO:0005615] extracellular space; [GO:0060090] molecular adaptor activity; [GO:0008092] cytoskeletal protein binding; [GO:0005856] cytoskeleton	GO:0017022 myosin binding;GO:0031267 small GTPase binding;GO:0051020 GTPase binding		Human disease related genes:Immune system diseases:Primary immunodeficiency; Predicted intracellular proteins; Disease related genes								0		0.0	0.0	0.0	0.0	0.0	0.0	0.0	0.0	0.0	0.0	0.0	0.0	0.0	0.0	0.0	0.0	0.0	0.0	0.0	0.0
PTGES	9536	symbol	H. sapiens	9536	H. sapiens	PTGES	prostaglandin E synthase	The protein encoded by this gene is a glutathione-dependent prostaglandin E synthase. The expression of this gene has been shown to be induced by proinflammatory cytokine interleukin 1 beta (IL1B). Its expression can also be induced by tumor suppressor protein TP53, and may be involved in TP53 induced apoptosis. Knockout studies in mice suggest that this gene may contribute to the pathogenesis of…	PTGES is a gene that encodes for a glutathione-dependent prostaglandin E synthase. The expression of this gene can be induced by proinflammatory cytokine interleukin 1 beta (IL1B) and tumor suppressor protein TP53, and may be involved in TP53 induced apoptosis. Knockout studies in mice suggest that this gene may contribute to the pathogenesis of collagen-induced arthritis and mediate acute pain d…	GO:0031620 regulation of fever generation;GO:0031650 regulation of heat generation;GO:0032306 regulation of prostaglandin secretion	GO:0005641 nuclear envelope lumen;GO:0031970 organelle envelope lumen;GO:0005635 nuclear envelope	[GO:0003824] catalytic activity; [GO:0016740] transferase activity; [GO:0016853] isomerase activity; [GO:0016491] oxidoreductase activity; [GO:0006629] lipid metabolic process; [GO:0098754] detoxification; [GO:0043226] organelle; [GO:0005783] endoplasmic reticulum; [GO:0016209] antioxidant activity; [GO:0023052] signaling; [GO:0050877] nervous system process; [GO:0006954] inflammatory response; […	GO:0004667 prostaglandin-D synthase activity;GO:0050220 prostaglandin-E synthase activity;GO:0043295 glutathione binding		ENZYME proteins:Isomerase; Enzymes; ENZYME proteins:Transferases	Endoplasmic reticulum (Supported)			yes	yes		(hsa00590)Arachidonic acid metabolism; (hsa01100)Metabolic pathways	0		0.0	0.0	0.0	0.0	1.0	0.0	0.0	0.0	0.0	0.0	0.0	0.0	0.0	0.0	0.0	0.0	0.0	1.0	0.0	0.0
DNAH12	201625	symbol	H. sapiens	201625	H. sapiens	DNAH12	dynein axonemal heavy chain 12	Predicted to enable several functions, including ATP binding activity; dynein intermediate chain binding activity; and dynein light intermediate chain binding activity. Predicted to be involved in microtubule-based movement. Predicted to be located in cilium; cytoplasm; and microtubule. Predicted to be part of dynein complex. [provided by Alliance of Genome Resources, Apr 2022]	DNAH12 is a gene that encodes for the dynein axonemal heavy chain 12 protein. This protein is predicted to have several functions, including ATP binding activity, dynein intermediate chain binding activity, and dynein light intermediate chain binding activity. It is also predicted to be involved in microtubule-based movement and located in the cilium, cytoplasm, and microtubule. Additionally, it …	GO:0007018 microtubule-based movement;GO:0007017 microtubule-based process;GO:0009987 cellular process	GO:0005858 axonemal dynein complex;GO:0030286 dynein complex;GO:0005875 microtubule associated complex	[GO:0043226] organelle; [GO:0005856] cytoskeleton; [GO:0007018] microtubule-based movement; [GO:0140657] ATP-dependent activity; [GO:0003774] cytoskeletal motor activity; [GO:0005929] cilium	GO:0008569 minus-end-directed microtubule motor activity;GO:0051959 dynein light intermediate chain binding;GO:0045505 dynein intermediate chain binding		Cancer-related genes:Mutated cancer genes; Predicted intracellular proteins	Centrosome (Approved); Additional: Cytosol						(hsa04814)Motor proteins; (hsa05016)Huntington disease; (hsa05014)Amyotrophic lateral sclerosis	1	hsa05014	0.0	0.0	0.0	0.0	0.0	0.0	0.0	0.0	0.0	0.0	0.0	0.0	0.0	0.0	0.0	0.0	0.0	0.0	0.0	0.0
PTGFR	5737	symbol	H. sapiens	5737	H. sapiens	PTGFR	prostaglandin F receptor	The protein encoded by this gene is member of the G-protein coupled receptor family. This protein is a receptor for prostaglandin F2-alpha (PGF2-alpha), which is known to be a potent luteolytic agent, and may also be involved in modulating intraocular pressure and smooth muscle contraction in uterus. Knockout studies in mice suggest that the interaction of PGF2-alpha with this receptor may initia…	PTGFR, also known as prostaglandin F receptor, is a gene that encodes a protein belonging to the G-protein coupled receptor family. This protein acts as a receptor for prostaglandin F2-alpha (PGF2-alpha), which is a potent luteolytic agent and may also play a role in regulating intraocular pressure and smooth muscle contraction in the uterus. Studies in mice suggest that the interaction between P…	GO:0071798 response to prostaglandin D;GO:0071799 cellular response to prostaglandin D stimulus;GO:0007567 parturition	GO:0005576 extracellular region;GO:0005886 plasma membrane;GO:0071944 cell periphery	[GO:0023052] signaling; [GO:0060089] molecular transducer activity; [GO:0005886] plasma membrane; [GO:0005576] extracellular region; [GO:0006954] inflammatory response; [GO:0022414] reproductive process; [GO:0012501] programmed cell death	GO:0004958 prostaglandin F receptor activity;GO:0004955 prostaglandin receptor activity;GO:0004954 prostanoid receptor activity		FDA approved drug targets:Small molecule drugs; G-protein coupled receptors:GPCRs excl olfactory receptors				yes	yes		(hsa04072)Phospholipase D signaling pathway; (hsa04020)Calcium signaling pathway; (hsa04080)Neuroactive ligand-receptor interaction	0		1.0	0.0	0.0	0.0	0.0	0.0	0.0	0.0	0.0	0.0	0.0	0.0	0.0	0.0	0.0	0.0	0.0	0.0	1.0	0.0
GABRA1	2554	symbol	H. sapiens	2554	H. sapiens	GABRA1	gamma-aminobutyric acid type A receptor subunit alpha1	This gene encodes a gamma-aminobutyric acid (GABA) receptor. GABA is the major inhibitory neurotransmitter in the mammalian brain where it acts at GABA-A receptors, which are ligand-gated chloride channels. Chloride conductance of these channels can be modulated by agents such as benzodiazepines that bind to the GABA-A receptor. GABA-A receptors are pentameric, consisting of proteins from several…	The GABRA1 gene encodes a protein that is a subunit of the gamma-aminobutyric acid (GABA) receptor, which is responsible for inhibitory neurotransmission in the brain. The GABA-A receptor is a ligand-gated chloride channel, and its chloride conductance can be modulated by agents such as benzodiazepines that bind to the receptor. The GABA-A receptor is composed of proteins from several subunit cla…	GO:1904862 inhibitory synapse assembly;GO:0051932 synaptic transmission, GABAergic;GO:0007214 gamma-aminobutyric acid signaling pathway	GO:1902711 GABA-A receptor complex;GO:1902710 GABA receptor complex;GO:0032590 dendrite membrane	[GO:0060089] molecular transducer activity; [GO:0005215] transporter activity; [GO:0023052] signaling; [GO:0055085] transmembrane transport; [GO:0005886] plasma membrane; [GO:0031410] cytoplasmic vesicle; [GO:0043226] organelle; [GO:0050877] nervous system process; [GO:0048856] anatomical structure development; [GO:0034330] cell junction organization	GO:0008503 benzodiazepine receptor activity;GO:0022851 GABA-gated chloride ion channel activity;GO:0005237 inhibitory extracellular ligand-gated monoatomic ion channel activity		Human disease related genes:Nervous system diseases:Epilepsy; Disease related genes; Transporters:Transporter channels and pores; Predicted intracellular proteins; FDA approved drug targets:Small molecule drugs	Plasma membrane (Approved); Additional: Nucleoplasm			yes	yes		(hsa05033)Nicotine addiction; (hsa04742)Taste transduction; (hsa04727)GABAergic synapse	1	hsa05032,hsa04723	1.0	1.0	0.0	0.0	0.0	0.0	0.0	0.0	0.0	0.0	0.0	0.0	0.0	0.0	0.0	0.0	1.0	0.0	0.0	0.0
PDCD6	10016	symbol	H. sapiens	10016	H. sapiens	PDCD6	programmed cell death 6	This gene encodes a calcium-binding protein belonging to the penta-EF-hand protein family. Calcium binding is important for homodimerization and for conformational changes required for binding to other protein partners. This gene product participates in T cell receptor-, Fas-, and glucocorticoid-induced programmed cell death. In mice deficient for this gene product, however, apoptosis was not blo…	PDCD6 is a gene that encodes a calcium-binding protein belonging to the penta-EF-hand protein family. The protein is important for homodimerization and for conformational changes required for binding to other protein partners. PDCD6 participates in programmed cell death induced by T cell receptor, Fas, and glucocorticoid. However, in mice deficient for this gene product, apoptosis was not blocked…	GO:1902527 positive regulation of protein monoubiquitination;GO:1902525 regulation of protein monoubiquitination;GO:0036324 vascular endothelial growth factor receptor-2 signaling pathway	GO:0030127 COPII vesicle coat;GO:0070971 endoplasmic reticulum exit site;GO:0031463 Cul3-RING ubiquitin ligase complex	[GO:0043226] organelle; [GO:0005634] nucleus; [GO:0005654] nucleoplasm; [GO:0005829] cytosol; [GO:0006886] intracellular protein transport; [GO:0031410] cytoplasmic vesicle; [GO:0005783] endoplasmic reticulum; [GO:0005768] endosome; [GO:0012501] programmed cell death; [GO:0016192] vesicle-mediated transport; [GO:0048856] anatomical structure development; [GO:0061024] membrane organization; [GO:00…	GO:0043495 protein-membrane adaptor activity;GO:1990756 ubiquitin ligase-substrate adaptor activity;GO:0140767 enzyme-substrate adaptor activity		Transporters:Primary Active Transporters; Predicted intracellular proteins	Cytosol (Supported); Additional: Nucleoplasm							0		0.0	0.0	1.0	0.0	0.0	1.0	0.0	0.0	1.0	0.0	0.0	0.0	0.0	1.0	1.0	0.0	0.0	0.0	0.0	0.0
A_32_P203232						None	None	None	None	None	None	None	None	None	None	None	None	None	None	None	None	None	None	None	nan	nan	nan	nan	nan	nan	nan	nan	nan	nan	nan	nan	nan	nan	nan	nan	nan	nan	nan	nan
AC073135.1						None	None	None	None	None	None	None	None	None	None	None	None	None	None	None	None	None	None	None	nan	nan	nan	nan	nan	nan	nan	nan	nan	nan	nan	nan	nan	nan	nan	nan	nan	nan	nan	nan
TPBG	7162	symbol	H. sapiens	7162	H. sapiens	TPBG	trophoblast glycoprotein	This gene encodes a leucine-rich transmembrane glycoprotein that may be involved in cell adhesion. The encoded protein is an oncofetal antigen that is specific to trophoblast cells. In adults this protein is highly expressed in many tumor cells and is associated with poor clinical outcome in numerous cancers. Alternate splicing in the 5' UTR results in multiple transcript variants that encode the…	The TPBG gene encodes a transmembrane glycoprotein that plays a role in cell adhesion. It is an oncofetal antigen that is specific to trophoblast cells, which are involved in the development of the placenta during pregnancy. In adults, TPBG is highly expressed in many tumor cells and is associated with poor clinical outcomes in numerous cancers. The gene undergoes alternate splicing in the 5' UTR…	GO:0008355 olfactory learning;GO:0042048 olfactory behavior;GO:0140059 dendrite arborization	GO:0043679 axon terminus;GO:0044306 neuron projection terminus;GO:0150034 distal axon	[GO:0005886] plasma membrane; [GO:0023052] signaling; [GO:0007155] cell adhesion; [GO:0050877] nervous system process; [GO:0048856] anatomical structure development; [GO:0034330] cell junction organization; [GO:0048870] cell motility; [GO:0072659] protein localization to plasma membrane; [GO:0030154] cell differentiation; [GO:0043226] organelle; [GO:0005783] endoplasmic reticulum				Nucleoplasm (Approved)			yes	yes			0		0.0	1.0	0.0	1.0	0.0	0.0	1.0	0.0	0.0	0.0	1.0	0.0	0.0	0.0	1.0	0.0	1.0	0.0	0.0	0.0
NCALD	83988	symbol	H. sapiens	83988	H. sapiens	NCALD	neurocalcin delta	This gene encodes a member of the neuronal calcium sensor (NCS) family of calcium-binding proteins. The protein contains an N-terminal myristoylation signal and four EF-hand calcium binding loops. The protein is cytosolic at resting calcium levels; however, elevated intracellular calcium levels induce a conformational change that exposes the myristoyl group, resulting in protein association with …	NCALD, also known as neurocalcin delta, is a gene that encodes a calcium-binding protein belonging to the neuronal calcium sensor family. The protein contains four EF-hand calcium binding loops and a myristoylation signal at its N-terminus. At resting calcium levels, the protein is cytosolic, but elevated intracellular calcium levels cause a conformational change that exposes the myristoyl group,…	GO:0003073 regulation of systemic arterial blood pressure;GO:0019722 calcium-mediated signaling;GO:0008217 regulation of blood pressure	GO:0030130 clathrin coat of trans-Golgi network vesicle;GO:0012510 trans-Golgi network transport vesicle membrane;GO:0030125 clathrin vesicle coat	[GO:0008092] cytoskeletal protein binding; [GO:0005829] cytosol; [GO:0016192] vesicle-mediated transport; [GO:0003013] circulatory system process; [GO:0023052] signaling; [GO:0031410] cytoplasmic vesicle; [GO:0043226] organelle; [GO:0005794] Golgi apparatus	GO:0043014 alpha-tubulin binding;GO:0030276 clathrin binding;GO:0015631 tubulin binding		Predicted intracellular proteins							(hsa04740)Olfactory transduction	1	hsa04740	0.0	1.0	1.0	0.0	0.0	0.0	0.0	0.0	0.0	1.0	0.0	0.0	0.0	0.0	0.0	0.0	0.0	0.0	1.0	1.0
A_32_P168561						None	None	None	None	None	None	None	None	None	None	None	None	None	None	None	None	None	None	None	nan	nan	nan	nan	nan	nan	nan	nan	nan	nan	nan	nan	nan	nan	nan	nan	nan	nan	nan	nan
KLK1	3816	symbol	H. sapiens	3816	H. sapiens	KLK1	kallikrein 1	Kallikreins are a subgroup of serine proteases having diverse physiological functions. Growing evidence suggests that many kallikreins are implicated in carcinogenesis and some have potential as novel cancer and other disease biomarkers. This gene is one of the fifteen kallikrein subfamily members located in a cluster on chromosome 19. This protein is functionally conserved in its capacity to rel…	KLK1, also known as kallikrein 1, is a gene that belongs to the kallikrein subfamily of serine proteases. This gene is located on chromosome 19 and is one of fifteen kallikrein subfamily members in a cluster. KLK1 is involved in the release of the vasoactive peptide, Lys-bradykinin, from low molecular weight kininogen. There is growing evidence that many kallikreins, including KLK1, are implicate…	GO:0031638 zymogen activation;GO:0003073 regulation of systemic arterial blood pressure;GO:0008217 regulation of blood pressure	GO:0070062 extracellular exosome;GO:1903561 extracellular vesicle;GO:0043230 extracellular organelle	[GO:0003824] catalytic activity; [GO:0016787] hydrolase activity; [GO:0140096] catalytic activity, acting on a protein; [GO:0043226] organelle; [GO:0005634] nucleus; [GO:0005576] extracellular region; [GO:0005615] extracellular space; [GO:0003013] circulatory system process; [GO:0031410] cytoplasmic vesicle; [GO:0051604] protein maturation	GO:0004252 serine-type endopeptidase activity;GO:0008236 serine-type peptidase activity;GO:0017171 serine hydrolase activity		Predicted secreted proteins; Enzymes; ENZYME proteins:Hydrolases; Peptidases:Serine-type peptidases			yes				(hsa04614)Renin-angiotensin system; (hsa04961)Endocrine and other factor-regulated calcium reabsorption	0		0.0	0.0	0.0	0.0	0.0	0.0	0.0	0.0	0.0	1.0	0.0	0.0	0.0	0.0	0.0	0.0	0.0	0.0	0.0	0.0
AKT2	208	symbol	H. sapiens	208	H. sapiens	AKT2	AKT serine/threonine kinase 2	This gene is a putative oncogene encoding a protein belonging to a subfamily of serine/threonine kinases containing SH2-like (Src homology 2-like) domains, which is involved in signaling pathways. The gene serves as an oncogene in the tumorigenesis of cancer cells For example, its overexpression contributes to the malignant phenotype of a subset of human ductal pancreatic cancers. The encoded pro…	AKT2 is a human gene that encodes a protein belonging to a subfamily of serine/threonine kinases containing SH2-like domains, which are involved in signaling pathways. This gene is a putative oncogene and serves as an oncogene in the tumorigenesis of cancer cells, including a subset of human ductal pancreatic cancers. Overexpression of AKT2 contributes to the malignant phenotype of these cancers.…	GO:0071486 cellular response to high light intensity;GO:0097473 retinal rod cell apoptotic process;GO:0010748 negative regulation of long-chain fatty acid import across plasma membrane	GO:0032587 ruffle membrane;GO:0001726 ruffle;GO:0031256 leading edge membrane	[GO:0036211] protein modification process; [GO:0003824] catalytic activity; [GO:0016740] transferase activity; [GO:0140096] catalytic activity, acting on a protein; [GO:0043226] organelle; [GO:0005634] nucleus; [GO:0005886] plasma membrane; [GO:0031410] cytoplasmic vesicle; [GO:0005768] endosome; [GO:0012501] programmed cell death; [GO:0023052] signaling; [GO:0005654] nucleoplasm; [GO:0005829] cy…	GO:0140677 molecular function activator activity;GO:0106310 protein serine kinase activity;GO:0004674 protein serine/threonine kinase activity	yes	Disease related genes; Enzymes; ENZYME proteins:Transferases; Human disease related genes:Cancers:Cancers of the breast and female genital organs; Potential drug targets; Kinases:AGC Ser/Thr protein kinases; Cancer-related genes:Candidate cancer biomarkers; RAS pathway related proteins; Predicted intracellular proteins; Human disease related genes:Congenital disorders of metabolism:Other congenit…	Cytosol;Nucleoplasm;Vesicles (Supported)					(M12771)SA PTEN PATHWAY; (M18895)SA TRKA RECEPTOR; (M184)PID ECADHERIN KERATINOCYTE PATHWAY	(hsa04973)Carbohydrate digestion and absorption; (hsa04923)Regulation of lipolysis in adipocytes; (hsa05213)Endometrial cancer	1	hsa04917,hsa05214,GO:0042552,hsa04722,hsa04728	1.0	1.0	0.0	1.0	1.0	0.0	0.0	0.0	0.0	0.0	0.0	0.0	0.0	0.0	1.0	0.0	0.0	1.0	0.0	0.0
PDLIM5	10611	symbol	H. sapiens	10611	H. sapiens	PDLIM5	PDZ and LIM domain 5	This gene encodes a member of a family of proteins that possess a 100-amino acid PDZ domain at the N terminus and one to three LIM domains at the C-terminus. This family member functions as a scaffold protein that tethers protein kinases to the Z-disk in striated muscles. It is thought to function in cardiomyocyte expansion and in restraining postsynaptic growth of excitatory synapses. Alternativ…	PDLIM5 is a gene that encodes a protein with a PDZ domain at the N terminus and one to three LIM domains at the C-terminus. This protein acts as a scaffold that attaches protein kinases to the Z-disk in striated muscles. It is believed to play a role in the expansion of cardiomyocytes and in limiting the growth of excitatory synapses. The gene undergoes alternative splicing, resulting in multiple…	GO:0003298 physiological muscle hypertrophy;GO:0003301 physiological cardiac muscle hypertrophy;GO:0061049 cell growth involved in cardiac muscle cell development	GO:0031941 filamentous actin;GO:0001725 stress fiber;GO:0097517 contractile actin filament bundle	[GO:0008092] cytoskeletal protein binding; [GO:0005829] cytosol; [GO:0043226] organelle; [GO:0005856] cytoskeleton; [GO:0007010] cytoskeleton organization; [GO:0098631] cell adhesion mediator activity; [GO:0048856] anatomical structure development; [GO:0007155] cell adhesion; [GO:0030154] cell differentiation; [GO:0034330] cell junction organization; [GO:0003012] muscle system process	GO:0051371 muscle alpha-actinin binding;GO:0098641 cadherin binding involved in cell-cell adhesion;GO:0051393 alpha-actinin binding		Predicted intracellular proteins	Plasma membrane (Approved); Additional: Focal adhesion sites;Nucleoplasm							0		0.0	1.0	0.0	0.0	0.0	0.0	1.0	0.0	0.0	0.0	1.0	0.0	0.0	0.0	0.0	1.0	0.0	0.0	0.0	0.0
LOC642373	728577	Gene_ID	H. sapiens	728577	H. sapiens	CNTNAP3B	contactin associated protein family member 3B	Predicted to be involved in cell adhesion. Predicted to be integral component of membrane. [provided by Alliance of Genome Resources, Apr 2022]	CNTNAP3B is a human gene that is a member of the contactin associated protein family. It is predicted to be involved in cell adhesion and is an integral component of the membrane. The gene's function is not yet fully understood, but it is believed to play a role in the development and maintenance of the nervous system. Further research is needed to fully understand the function of CNTNAP3B and it…	GO:0007155 cell adhesion;GO:0009987 cellular process;GO:0008150 biological_process	GO:0016020 membrane;GO:0110165 cellular anatomical entity;GO:0005575 cellular_component	[GO:0007155] cell adhesion			Predicted intracellular proteins				yes	yes			0		0.0	0.0	0.0	0.0	0.0	0.0	0.0	0.0	0.0	0.0	0.0	0.0	0.0	0.0	0.0	0.0	0.0	0.0	0.0	0.0
EFHD2	79180	symbol	H. sapiens	79180	H. sapiens	EFHD2	EF-hand domain family member D2	Enables cadherin binding activity. Predicted to be located in plasma membrane. [provided by Alliance of Genome Resources, Apr 2022]	EFHD2, also known as EF-hand domain family member D2, is a human gene that encodes a protein involved in cadherin binding activity. The protein is predicted to be located in the plasma membrane. Cadherins are transmembrane proteins that play a crucial role in cell-cell adhesion and signaling. EFHD2 may be involved in regulating cadherin-mediated cell adhesion and signaling pathways. The gene is e…		GO:0045121 membrane raft;GO:0098857 membrane microdomain;GO:0016020 membrane		GO:0045296 cadherin binding;GO:0050839 cell adhesion molecule binding;GO:0005509 calcium ion binding		Predicted intracellular proteins	Cytosol (Approved)							0		0.0	0.0	1.0	0.0	0.0	0.0	0.0	0.0	0.0	0.0	0.0	0.0	0.0	0.0	0.0	0.0	0.0	0.0	0.0	0.0
CASR	846	symbol	H. sapiens	846	H. sapiens	CASR	calcium sensing receptor	The protein encoded by this gene is a plasma membrane G protein-coupled receptor that senses small changes in circulating calcium concentration. The encoded protein couples this information to intracellular signaling pathways that modify parathyroid hormone secretion or renal cation handling, and thus this protein plays an essential role in maintaining mineral ion homeostasis. Mutations in this g…	CASR is a gene that encodes a plasma membrane G protein-coupled receptor that senses small changes in circulating calcium concentration. This protein plays a crucial role in maintaining mineral ion homeostasis by coupling calcium concentration information to intracellular signaling pathways that modify parathyroid hormone secretion or renal cation handling. Mutations in this gene are associated w…	GO:0032782 bile acid secretion;GO:0060613 fat pad development;GO:0005513 detection of calcium ion	GO:0043679 axon terminus;GO:0044306 neuron projection terminus;GO:0016323 basolateral plasma membrane	[GO:0023052] signaling; [GO:0060089] molecular transducer activity; [GO:0005886] plasma membrane; [GO:0055065] metal ion homeostasis; [GO:0003824] catalytic activity; [GO:0016787] hydrolase activity; [GO:0048856] anatomical structure development; [GO:0012501] programmed cell death; [GO:0003013] circulatory system process; [GO:0055085] transmembrane transport; [GO:0043226] organelle; [GO:0005634] …	GO:0004435 phosphatidylinositol phospholipase C activity;GO:0004629 phospholipase C activity;GO:0016597 amino acid binding		Human disease related genes:Endocrine and metabolic diseases:Other endocrine and metabolic diseases; Human disease related genes:Nervous system diseases:Epilepsy; Transporters; Disease related genes; Human disease related genes:Cancers:Cancers of endocrine organs; G-protein coupled receptors:GPCRs excl olfactory receptors; Human disease related genes:Congenital disorders of metabolism:Congenital …				yes	yes	(M184)PID ECADHERIN KERATINOCYTE PATHWAY	(hsa04928)Parathyroid hormone synthesis, secretion and action; (hsa04621)NOD-like receptor signaling pathway	0		1.0	1.0	1.0	1.0	1.0	1.0	0.0	0.0	1.0	1.0	0.0	0.0	0.0	0.0	1.0	0.0	0.0	1.0	0.0	0.0
HAPLN4	404037	symbol	H. sapiens	404037	H. sapiens	HAPLN4	hyaluronan and proteoglycan link protein 4	Predicted to enable hyaluronic acid binding activity. Predicted to be involved in central nervous system development and skeletal system development. Predicted to be located in extracellular region. Predicted to be active in extracellular matrix. [provided by Alliance of Genome Resources, Apr 2022]	HAPLN4 is a human gene that is predicted to have hyaluronic acid binding activity and be involved in central nervous system and skeletal system development. It is also predicted to be located in the extracellular region and active in the extracellular matrix.	GO:1904862 inhibitory synapse assembly;GO:0051932 synaptic transmission, GABAergic;GO:0002052 positive regulation of neuroblast proliferation	GO:0072534 perineuronal net;GO:0098966 perisynaptic extracellular matrix;GO:0099535 synapse-associated extracellular matrix	[GO:0007155] cell adhesion; [GO:0005576] extracellular region; [GO:0023052] signaling; [GO:0031012] extracellular matrix; [GO:0030312] external encapsulating structure; [GO:0048856] anatomical structure development; [GO:0034330] cell junction organization; [GO:0005198] structural molecule activity	GO:0150043 structural constituent of synapse-associated extracellular matrix;GO:0005540 hyaluronic acid binding;GO:0005201 extracellular matrix structural constituent		Predicted secreted proteins		yes	yes		yes	(M5882)NABA PROTEOGLYCANS; (M5884)NABA CORE MATRISOME; (M5889)NABA MATRISOME		0		0.0	1.0	0.0	0.0	0.0	0.0	1.0	1.0	0.0	0.0	0.0	0.0	0.0	0.0	0.0	0.0	1.0	0.0	0.0	0.0
A_32_P93115						None	None	None	None	None	None	None	None	None	None	None	None	None	None	None	None	None	None	None	nan	nan	nan	nan	nan	nan	nan	nan	nan	nan	nan	nan	nan	nan	nan	nan	nan	nan	nan	nan
HDC	3067	symbol	H. sapiens	3067	H. sapiens	HDC	histidine decarboxylase	This gene encodes a member of the group II decarboxylase family and forms a homodimer that converts L-histidine to histamine in a pyridoxal phosphate dependent manner. Histamine regulates several physiologic processes, including neurotransmission, gastric acid secretion,inflamation, and smooth muscle tone.[provided by RefSeq, Aug 2010]	The HDC gene encodes an enzyme called histidine decarboxylase, which is responsible for converting L-histidine into histamine. This process is dependent on the presence of pyridoxal phosphate. Histamine is a molecule that plays a role in various physiological processes, including neurotransmission, gastric acid secretion, inflammation, and smooth muscle tone. The HDC gene belongs to the group II …	GO:0001694 histamine biosynthetic process;GO:0001692 histamine metabolic process;GO:0052803 imidazole-containing compound metabolic process	GO:0005829 cytosol;GO:0005737 cytoplasm;GO:0005622 intracellular anatomical structure	[GO:0003824] catalytic activity; [GO:0006520] cellular amino acid metabolic process; [GO:0016829] lyase activity; [GO:0005829] cytosol	GO:0004398 histidine decarboxylase activity;GO:0016831 carboxy-lyase activity;GO:0016830 carbon-carbon lyase activity		ENZYME proteins:Lyases; Enzymes; Human disease related genes:Other diseases:Mental and behavioural disorders; Predicted intracellular proteins	Nuclear bodies (Approved)						(hsa00340)Histidine metabolism; (hsa01100)Metabolic pathways	0		0.0	0.0	0.0	0.0	0.0	0.0	0.0	0.0	0.0	0.0	0.0	1.0	0.0	0.0	0.0	0.0	0.0	0.0	0.0	0.0
HHIP	64399	symbol	H. sapiens	64399	H. sapiens	HHIP	hedgehog interacting protein	This gene encodes a member of the hedgehog-interacting protein (HHIP) family. The hedgehog (HH) proteins are evolutionarily conserved protein, which are important morphogens for a wide range of developmental processes, including anteroposterior patterns of limbs and regulation of left-right asymmetry in embryonic development. Multiple cell-surface receptors are responsible for transducing and/or …	The HHIP gene encodes a protein that belongs to the hedgehog-interacting protein family. Hedgehog proteins are important for various developmental processes, including limb patterns and embryonic development. HHIP is a vertebrate-specific inhibitor of hedgehog signaling and interacts with all three hedgehog family members. Two single nucleotide polymorphisms (SNPs) near this gene are associated w…	GO:0060441 epithelial tube branching involved in lung morphogenesis;GO:0045879 negative regulation of smoothened signaling pathway;GO:0040036 regulation of fibroblast growth factor receptor signaling pathway	GO:0060170 ciliary membrane;GO:0031253 cell projection membrane;GO:0005929 cilium	[GO:0005576] extracellular region; [GO:0005886] plasma membrane; [GO:0023052] signaling; [GO:0043226] organelle; [GO:0005929] cilium; [GO:0048856] anatomical structure development; [GO:0030154] cell differentiation; [GO:0012501] programmed cell death; [GO:0005634] nucleus	GO:0097108 hedgehog family protein binding;GO:0008270 zinc ion binding;GO:0046914 transition metal ion binding		Predicted secreted proteins	Nucleoplasm (Approved)	yes	yes		yes	(M211)PID HEDGEHOG 2PATHWAY; (M5883)NABA SECRETED FACTORS; (M5885)NABA MATRISOME ASSOCIATED	(hsa04340)Hedgehog signaling pathway; (hsa05217)Basal cell carcinoma; (hsa04024)cAMP signaling pathway	0		0.0	0.0	0.0	0.0	0.0	1.0	0.0	0.0	0.0	0.0	0.0	0.0	0.0	0.0	0.0	0.0	0.0	0.0	0.0	0.0
A_32_P497742						None	None	None	None	None	None	None	None	None	None	None	None	None	None	None	None	None	None	None	nan	nan	nan	nan	nan	nan	nan	nan	nan	nan	nan	nan	nan	nan	nan	nan	nan	nan	nan	nan
A_24_P62668						None	None	None	None	None	None	None	None	None	None	None	None	None	None	None	None	None	None	None	nan	nan	nan	nan	nan	nan	nan	nan	nan	nan	nan	nan	nan	nan	nan	nan	nan	nan	nan	nan
PCDHB8	56128	symbol	H. sapiens	56128	H. sapiens	PCDHB8	protocadherin beta 8	This gene is a member of the protocadherin beta gene cluster, one of three related gene clusters tandemly linked on chromosome five. The gene clusters demonstrate an unusual genomic organization similar to that of B-cell and T-cell receptor gene clusters. The beta cluster contains 16 genes and 3 pseudogenes, each encoding 6 extracellular cadherin domains and a cytoplasmic tail that deviates from …	PCDHB8 is a gene that belongs to the protocadherin beta gene cluster, which is one of three gene clusters located on chromosome five. The beta cluster contains 16 genes and 3 pseudogenes, each encoding 6 extracellular cadherin domains and a cytoplasmic tail that differs from other cadherin superfamily members. The extracellular domains interact homophilically to specify differential cell-cell con…	GO:0007156 homophilic cell adhesion via plasma membrane adhesion molecules;GO:0098742 cell-cell adhesion via plasma-membrane adhesion molecules;GO:0098609 cell-cell adhesion	GO:0005886 plasma membrane;GO:0071944 cell periphery;GO:0016020 membrane	[GO:0005886] plasma membrane; [GO:0007155] cell adhesion; [GO:0048856] anatomical structure development	GO:0005509 calcium ion binding;GO:0042802 identical protein binding;GO:0046872 metal ion binding						yes	yes			0		0.0	0.0	1.0	0.0	0.0	0.0	0.0	0.0	0.0	0.0	1.0	0.0	0.0	0.0	0.0	0.0	0.0	0.0	0.0	0.0
PTX3	5806	symbol	H. sapiens	5806	H. sapiens	PTX3	pentraxin 3	This gene encodes a member of the pentraxin protein family. The expression of this protein is induced by inflammatory cytokines in response to inflammatory stimuli in several mesenchymal and epithelial cell types, particularly endothelial cells and mononuclear phagocytes. The protein promotes fibrocyte differentiation and is involved in regulating inflammation and complement activation. It also p…	PTX3, or pentraxin 3, is a protein that belongs to the pentraxin family. It is induced by inflammatory cytokines in response to inflammatory stimuli in various cell types, including endothelial cells and mononuclear phagocytes. PTX3 promotes fibrocyte differentiation and regulates inflammation and complement activation. It also plays a role in angiogenesis and tissue remodeling. PTX3 serves as a …	GO:0044866 modulation by host of viral exo-alpha-sialidase activity;GO:0044867 modulation by host of viral catalytic activity;GO:0044869 negative regulation by host of viral exo-alpha-sialidase activity	GO:1904724 tertiary granule lumen;GO:0035580 specific granule lumen;GO:0042581 specific granule	[GO:0002376] immune system process; [GO:0098542] defense response to other organism; [GO:0005576] extracellular region; [GO:0005615] extracellular space; [GO:0006954] inflammatory response; [GO:0031410] cytoplasmic vesicle; [GO:0043226] organelle; [GO:1901135] carbohydrate derivative metabolic process; [GO:0022414] reproductive process; [GO:0048856] anatomical structure development; [GO:0030154] …	GO:0001872 (1->3)-beta-D-glucan binding;GO:0001849 complement component C1q complex binding;GO:0046790 virion binding		Predicted secreted proteins	Plasma membrane (Uncertain)	yes	yes					0		0.0	0.0	0.0	0.0	0.0	0.0	0.0	0.0	0.0	0.0	0.0	0.0	0.0	1.0	0.0	0.0	0.0	0.0	1.0	0.0
A_32_P11262						None	None	None	None	None	None	None	None	None	None	None	None	None	None	None	None	None	None	None	nan	nan	nan	nan	nan	nan	nan	nan	nan	nan	nan	nan	nan	nan	nan	nan	nan	nan	nan	nan
A_32_P1948						None	None	None	None	None	None	None	None	None	None	None	None	None	None	None	None	None	None	None	nan	nan	nan	nan	nan	nan	nan	nan	nan	nan	nan	nan	nan	nan	nan	nan	nan	nan	nan	nan
UTS2	10911	symbol	H. sapiens	10911	H. sapiens	UTS2	urotensin 2	This gene encodes a mature peptide that is an active cyclic heptapeptide absolutely conserved from lamprey to human. The active peptide acts as a vasoconstrictor and is expressed only in brain tissue. Despite the gene family name similarity, this gene is not homologous to urocortin, a member of the sauvagine/corticotropin-releasing factor/urotensin I family. Most of the proprotein is cleaved to m…	The human gene UTS2 encodes a cyclic heptapeptide called urotensin 2, which is conserved from lamprey to human. This peptide acts as a vasoconstrictor and is only expressed in brain tissue. Despite its name similarity to the urocortin gene family, UTS2 is not homologous to urocortin. The majority of the proprotein is cleaved to produce the mature peptide. Different preproprotein isoforms have bee…	GO:0035296 regulation of tube diameter;GO:0097746 blood vessel diameter maintenance;GO:0035150 regulation of tube size	GO:0045202 synapse;GO:0030054 cell junction;GO:0005615 extracellular space	[GO:0005576] extracellular region; [GO:0098772] molecular function regulator activity; [GO:0048018] receptor ligand activity; [GO:0003013] circulatory system process; [GO:0023052] signaling; [GO:0005615] extracellular space; [GO:0003012] muscle system process	GO:0005179 hormone activity;GO:0048018 receptor ligand activity;GO:0030546 signaling receptor activator activity		Predicted secreted proteins; Predicted intracellular proteins		yes	yes				(hsa04080)Neuroactive ligand-receptor interaction	0		1.0	1.0	0.0	0.0	1.0	0.0	0.0	0.0	0.0	1.0	0.0	0.0	0.0	0.0	0.0	0.0	0.0	0.0	0.0	0.0
WNT10A	80326	symbol	H. sapiens	80326	H. sapiens	WNT10A	Wnt family member 10A	The WNT gene family consists of structurally related genes which encode secreted signaling proteins. These proteins have been implicated in oncogenesis and in several developmental processes, including regulation of cell fate and patterning during embryogenesis. This gene is a member of the WNT gene family. It is strongly expressed in the cell lines of promyelocytic leukemia and Burkitt's lymphom…	WNT10A is a member of the WNT gene family, which encodes secreted signaling proteins that play a role in oncogenesis and developmental processes. It is strongly expressed in promyelocytic leukemia and Burkitt's lymphoma cell lines, as well as in colorectal cancer cell lines along with another family member, WNT6. Overexpression of WNT10A may contribute to carcinogenesis by activating the WNT-beta…	GO:0048733 sebaceous gland development;GO:0042487 regulation of odontogenesis of dentin-containing tooth;GO:0042481 regulation of odontogenesis	GO:0005615 extracellular space;GO:0005576 extracellular region;GO:0110165 cellular anatomical entity	[GO:0005576] extracellular region; [GO:0048856] anatomical structure development; [GO:0023052] signaling; [GO:0005615] extracellular space; [GO:0030154] cell differentiation; [GO:0098772] molecular function regulator activity; [GO:0048018] receptor ligand activity	GO:0005109 frizzled binding;GO:0005125 cytokine activity;GO:0001664 G protein-coupled receptor binding		Human disease related genes:Digestive system diseases:Mouth and dental diseases; Disease related genes; Predicted secreted proteins; Predicted intracellular proteins; Human disease related genes:Congenital malformations:Congenital malformations of skin		yes	yes		yes	(M5493)WNT SIGNALING; (M5883)NABA SECRETED FACTORS; (M5885)NABA MATRISOME ASSOCIATED	(hsa05217)Basal cell carcinoma; (hsa04916)Melanogenesis; (hsa04550)Signaling pathways regulating pluripotency of stem cells	0		1.0	0.0	0.0	0.0	1.0	1.0	0.0	0.0	0.0	0.0	0.0	0.0	1.0	0.0	0.0	0.0	0.0	0.0	0.0	0.0
UNC13C	440279	symbol	H. sapiens	440279	H. sapiens	UNC13C	unc-13 homolog C	Predicted to enable calmodulin binding activity and syntaxin-1 binding activity. Predicted to be involved in several processes, including glutamatergic synaptic transmission; regulated exocytosis; and synaptic vesicle maturation. Predicted to be located in presynaptic active zone. Predicted to be active in several cellular components, including axon terminus; parallel fiber to Purkinje cell synap…	UNC13C is a human gene that is predicted to have calmodulin binding activity and syntaxin-1 binding activity. It is involved in several processes, including glutamatergic synaptic transmission, regulated exocytosis, and synaptic vesicle maturation. The gene is predicted to be located in the presynaptic active zone and active in several cellular components, including the axon terminus, parallel fi…	GO:0031914 negative regulation of synaptic plasticity;GO:0061789 dense core granule priming;GO:0099011 neuronal dense core vesicle exocytosis	GO:0098831 presynaptic active zone cytoplasmic component;GO:0044305 calyx of Held;GO:0098688 parallel fiber to Purkinje cell synapse	[GO:0023052] signaling; [GO:0008289] lipid binding; [GO:0016192] vesicle-mediated transport; [GO:0005886] plasma membrane; [GO:0065003] protein-containing complex assembly; [GO:0034330] cell junction organization; [GO:0031410] cytoplasmic vesicle; [GO:0043226] organelle	GO:0019992 diacylglycerol binding;GO:0017075 syntaxin-1 binding;GO:0019905 syntaxin binding		Predicted intracellular proteins							(hsa04721)Synaptic vesicle cycle	0		0.0	1.0	1.0	0.0	0.0	0.0	0.0	0.0	0.0	0.0	0.0	0.0	0.0	0.0	0.0	0.0	1.0	0.0	0.0	0.0
SYT10	341359	symbol	H. sapiens	341359	H. sapiens	SYT10	synaptotagmin 10	Predicted to enable several functions, including phospholipid binding activity; protein dimerization activity; and syntaxin binding activity. Predicted to be involved in several processes, including cellular response to calcium ion; regulation of secretion by cell; and sensory perception of smell. Predicted to be located in synapse and transport vesicle membrane. Predicted to be integral componen…	SYT10, also known as synaptotagmin 10, is a human gene that is predicted to have several functions, including binding to phospholipids, dimerizing proteins, and binding to syntaxin. It is also predicted to be involved in processes such as responding to calcium ions, regulating secretion by cells, and sensing smells. SYT10 is predicted to be located in the synapse and transport vesicle membrane, a…	GO:0045956 positive regulation of calcium ion-dependent exocytosis;GO:0014059 regulation of dopamine secretion;GO:0017158 regulation of calcium ion-dependent exocytosis	GO:0070382 exocytic vesicle;GO:0030658 transport vesicle membrane;GO:0098978 glutamatergic synapse	[GO:0016192] vesicle-mediated transport; [GO:0031410] cytoplasmic vesicle; [GO:0043226] organelle; [GO:0050877] nervous system process; [GO:0005886] plasma membrane; [GO:0023052] signaling; [GO:0008289] lipid binding	GO:0005544 calcium-dependent phospholipid binding;GO:0001786 phosphatidylserine binding;GO:0019905 syntaxin binding			Nucleoplasm;Vesicles (Approved)			yes	yes			0		0.0	1.0	1.0	1.0	1.0	0.0	0.0	0.0	1.0	0.0	0.0	0.0	0.0	0.0	0.0	0.0	0.0	0.0	0.0	0.0
SRPX2	27286	symbol	H. sapiens	27286	H. sapiens	SRPX2	sushi repeat containing protein X-linked 2	This gene encodes a secreted protein that contains three sushi repeat motifs. The encoded protein may play a role in the development of speech and language centers in the brain. This protein may also be involved in angiogenesis. Mutations in this gene are the cause of bilateral perisylvian polymicrogyria, rolandic epilepsy, speech dyspraxia and cognitive disability. [provided by RefSeq, May 2010]	SRPX2 is a gene that encodes a secreted protein containing three sushi repeat motifs. This protein is believed to play a role in the development of speech and language centers in the brain, as well as in angiogenesis. Mutations in this gene have been linked to several neurological disorders, including bilateral perisylvian polymicrogyria, rolandic epilepsy, speech dyspraxia, and cognitive disabil…	GO:0071625 vocalization behavior;GO:0090050 positive regulation of cell migration involved in sprouting angiogenesis;GO:0051965 positive regulation of synapse assembly	GO:0060076 excitatory synapse;GO:0097060 synaptic membrane;GO:0062023 collagen-containing extracellular matrix	[GO:0048856] anatomical structure development; [GO:0005576] extracellular region; [GO:0007155] cell adhesion; [GO:0005615] extracellular space; [GO:0005886] plasma membrane; [GO:0031012] extracellular matrix; [GO:0030312] external encapsulating structure; [GO:0005198] structural molecule activity; [GO:0034330] cell junction organization; [GO:0048870] cell motility	GO:0036458 hepatocyte growth factor binding;GO:0019838 growth factor binding;GO:0005201 extracellular matrix structural constituent		Human disease related genes:Nervous system diseases:Epilepsy; Predicted secreted proteins; Predicted intracellular proteins; Disease related genes		yes	yes			(M3008)NABA ECM GLYCOPROTEINS; (M5884)NABA CORE MATRISOME; (M5889)NABA MATRISOME		0		0.0	0.0	0.0	1.0	0.0	1.0	1.0	1.0	0.0	0.0	1.0	0.0	0.0	1.0	1.0	0.0	0.0	0.0	0.0	0.0
ATOH7	220202	symbol	H. sapiens	220202	H. sapiens	ATOH7	atonal bHLH transcription factor 7	This intronless gene encodes a member of the basic helix-loop-helix family of transcription factors, with similarity to Drosophila atonal gene that controls photoreceptor development. Studies in mice suggest that this gene plays a central role in retinal ganglion cell and optic nerve formation. Mutations in this gene are associated with nonsyndromic congenital retinal nonattachment. [provided by …	ATOH7 is a gene that encodes a transcription factor belonging to the basic helix-loop-helix family. It is similar to the Drosophila atonal gene, which is responsible for photoreceptor development. In mice, ATOH7 is involved in the formation of retinal ganglion cells and the optic nerve. Mutations in this gene have been linked to nonsyndromic congenital retinal nonattachment. This gene does not co…	GO:1902336 positive regulation of retinal ganglion cell axon guidance;GO:1902669 positive regulation of axon guidance;GO:0090259 regulation of retinal ganglion cell axon guidance	GO:0043204 perikaryon;GO:0043025 neuronal cell body;GO:0044297 cell body	[GO:0006351] DNA-templated transcription; [GO:0006355] regulation of DNA-templated transcription; [GO:0048856] anatomical structure development; [GO:0043226] organelle; [GO:0005634] nucleus; [GO:0003677] DNA binding; [GO:0030154] cell differentiation; [GO:0140110] transcription regulator activity; [GO:0005694] chromosome	GO:0070888 E-box binding;GO:0046983 protein dimerization activity;GO:0000978 RNA polymerase II cis-regulatory region sequence-specific DNA binding		Human disease related genes:Nervous system diseases:Eye disease; Predicted intracellular proteins; Transcription factors:Basic domains; Disease related genes								1	GO:0090259	0.0	0.0	0.0	0.0	0.0	0.0	1.0	0.0	0.0	0.0	0.0	0.0	1.0	1.0	0.0	0.0	0.0	0.0	0.0	0.0
GABRQ	55879	symbol	H. sapiens	55879	H. sapiens	GABRQ	gamma-aminobutyric acid type A receptor subunit theta	The gamma-aminobutyric acid (GABA) A receptor is a multisubunit chloride channel that mediates the fastest inhibitory synaptic transmission in the central nervous system. This gene encodes the theta subunit of the GABA A receptor. The gene is mapped to chromosome Xq28 in a cluster of genes including those that encode the alpha 3 and epsilon subunits of the GABA A receptor. [provided by RefSeq, Ju…	GABRQ is a gene that encodes the theta subunit of the gamma-aminobutyric acid (GABA) A receptor, which is a chloride channel that mediates inhibitory synaptic transmission in the central nervous system. The gene is located on chromosome Xq28 and is part of a cluster of genes that also encode the alpha 3 and epsilon subunits of the GABA A receptor.	GO:1902476 chloride transmembrane transport;GO:0006821 chloride transport;GO:0098661 inorganic anion transmembrane transport	GO:1902711 GABA-A receptor complex;GO:1902710 GABA receptor complex;GO:0034707 chloride channel complex	[GO:0060089] molecular transducer activity; [GO:0005215] transporter activity; [GO:0055085] transmembrane transport; [GO:0005886] plasma membrane; [GO:0023052] signaling; [GO:0050877] nervous system process	GO:0004890 GABA-A receptor activity;GO:0005326 neurotransmitter transmembrane transporter activity;GO:0016917 GABA receptor activity		FDA approved drug targets:Small molecule drugs				yes	yes		(hsa05033)Nicotine addiction; (hsa04727)GABAergic synapse; (hsa05032)Morphine addiction	1	hsa05032,hsa04723	1.0	1.0	0.0	0.0	0.0	0.0	0.0	0.0	0.0	0.0	0.0	0.0	0.0	0.0	0.0	0.0	0.0	0.0	0.0	0.0
A_32_P118657						None	None	None	None	None	None	None	None	None	None	None	None	None	None	None	None	None	None	None	nan	nan	nan	nan	nan	nan	nan	nan	nan	nan	nan	nan	nan	nan	nan	nan	nan	nan	nan	nan
LGALS2	3957	symbol	H. sapiens	3957	H. sapiens	LGALS2	galectin 2	The protein encoded by this gene is a soluble beta-galactoside binding lectin. The encoded protein is found as a homodimer and can bind to lymphotoxin-alpha. A single nucleotide polymorphism in an intron of this gene can alter the transcriptional level of the protein, with a resultant increased risk of myocardial infarction. [provided by RefSeq, Jul 2008]	LGALS2 is a gene that encodes for a soluble beta-galactoside binding lectin called galectin 2. This protein is found as a homodimer and can bind to lymphotoxin-alpha. A single nucleotide polymorphism in an intron of this gene can alter the transcriptional level of the protein, which can increase the risk of myocardial infarction.	GO:0043029 T cell homeostasis;GO:0002260 lymphocyte homeostasis;GO:0001776 leukocyte homeostasis	GO:1990724 galectin complex;GO:0098635 protein complex involved in cell-cell adhesion;GO:0098636 protein complex involved in cell adhesion	[GO:0006954] inflammatory response; [GO:0002376] immune system process; [GO:0012501] programmed cell death; [GO:0007155] cell adhesion	GO:0016936 galactoside binding;GO:0030246 carbohydrate binding;GO:0097367 carbohydrate derivative binding		Predicted intracellular proteins	Mitochondria (Approved); Additional: Nucleoplasm					(M5880)NABA ECM AFFILIATED; (M5885)NABA MATRISOME ASSOCIATED; (M5889)NABA MATRISOME		0		0.0	0.0	0.0	0.0	0.0	0.0	0.0	0.0	0.0	0.0	1.0	0.0	0.0	0.0	0.0	0.0	0.0	0.0	0.0	0.0
HTR3A	3359	symbol	H. sapiens	3359	H. sapiens	HTR3A	5-hydroxytryptamine receptor 3A	The product of this gene belongs to the ligand-gated ion channel receptor superfamily. This gene encodes subunit A of the type 3 receptor for 5-hydroxytryptamine (serotonin), a biogenic hormone that functions as a neurotransmitter, a hormone, and a mitogen. This receptor causes fast, depolarizing responses in neurons after activation. It appears that the heteromeric combination of A and B subunit…	HTR3A is a human gene that encodes subunit A of the type 3 receptor for 5-hydroxytryptamine (serotonin), a neurotransmitter, hormone, and mitogen. This gene belongs to the ligand-gated ion channel receptor superfamily and causes fast, depolarizing responses in neurons after activation. The full functional features of this receptor require the heteromeric combination of A and B subunits, as either…	GO:0007210 serotonin receptor signaling pathway;GO:1903351 cellular response to dopamine;GO:1903350 response to dopamine	GO:1904602 serotonin-activated cation-selective channel complex;GO:0098665 serotonin receptor complex;GO:0098878 neurotransmitter receptor complex	[GO:0005215] transporter activity; [GO:0005886] plasma membrane; [GO:0060089] molecular transducer activity; [GO:0055085] transmembrane transport; [GO:0023052] signaling; [GO:0050877] nervous system process	GO:0022850 serotonin-gated monoatomic cation-selective channel activity;GO:0051378 serotonin binding;GO:0043176 amine binding		FDA approved drug targets:Small molecule drugs; Transporters:Transporter channels and pores				yes	yes		(hsa04742)Taste transduction; (hsa04726)Serotonergic synapse	0		0.0	1.0	0.0	0.0	0.0	0.0	0.0	0.0	0.0	0.0	0.0	0.0	0.0	0.0	0.0	0.0	0.0	0.0	0.0	0.0
RSPO2	340419	symbol	H. sapiens	340419	H. sapiens	RSPO2	R-spondin 2	This gene encodes a member of the R-spondin family of proteins. These proteins are secreted ligands of leucine-rich repeat containing G protein-coupled receptors that enhance Wnt signaling through the inhibition of ubiquitin E3 ligases. A chromosomal translocation including this locus that results in the formation of a gene fusion has been identified in multiple human cancers. Alternative splicin…	RSPO2 is a gene that encodes a protein belonging to the R-spondin family. These proteins are secreted ligands that enhance Wnt signaling by inhibiting ubiquitin E3 ligases through leucine-rich repeat containing G protein-coupled receptors. Alternative splicing of RSPO2 results in multiple transcript variants. A chromosomal translocation involving this gene has been identified in various human can…	GO:0042483 negative regulation of odontogenesis;GO:0042489 negative regulation of odontogenesis of dentin-containing tooth;GO:0110111 negative regulation of animal organ morphogenesis	GO:0009986 cell surface;GO:0005576 extracellular region;GO:0110165 cellular anatomical entity	[GO:0023052] signaling; [GO:0005576] extracellular region; [GO:0048856] anatomical structure development; [GO:0030154] cell differentiation	GO:0008201 heparin binding;GO:0005539 glycosaminoglycan binding;GO:1901681 sulfur compound binding		Disease related genes; Cancer-related genes; Predicted secreted proteins; Human disease related genes:Congenital malformations:Congenital malformations of the musculoskeletal system; Predicted intracellular proteins		yes	yes			(M3008)NABA ECM GLYCOPROTEINS; (M5884)NABA CORE MATRISOME; (M5889)NABA MATRISOME	(hsa04310)Wnt signaling pathway	0		0.0	0.0	0.0	0.0	0.0	1.0	0.0	1.0	0.0	0.0	0.0	0.0	0.0	0.0	0.0	0.0	0.0	0.0	0.0	0.0
PLAC2	257000	gene_synonym	H. sapiens	257000	H. sapiens	TINCR	TINCR ubiquitin domain containing	This gene produces a spliced long non-coding RNA that binds RNAs. This transcript interacts with staufen-1 protein to regulate the stability of mRNAs for genes involved in the differentiation of epidermal tissue. Variation in this gene may be associated with cancer progression. [provided by RefSeq, Aug 2017]	TINCR is a gene that produces a long non-coding RNA which binds to other RNAs. This RNA interacts with a protein called staufen-1 to regulate the stability of mRNAs for genes involved in the differentiation of epidermal tissue. Variations in this gene may be associated with cancer progression.						Predicted intracellular proteins								0		0.0	0.0	0.0	0.0	0.0	0.0	0.0	0.0	0.0	0.0	0.0	0.0	0.0	0.0	0.0	0.0	0.0	0.0	0.0	0.0
GALR1	2587	symbol	H. sapiens	2587	H. sapiens	GALR1	galanin receptor 1	The neuropeptide galanin elicits a range of biological effects by interaction with specific G-protein-coupled receptors. Galanin receptors are seven-transmembrane proteins shown to activate a variety of intracellular second-messenger pathways. GALR1 inhibits adenylyl cyclase via a G protein of the Gi/Go family. GALR1 is widely expressed in the brain and spinal cord, as well as in peripheral sites…	GALR1 is a gene that codes for the galanin receptor 1, a protein that interacts with the neuropeptide galanin to produce various biological effects. The receptor is a seven-transmembrane protein that activates intracellular second-messenger pathways and inhibits adenylyl cyclase via a G protein of the Gi/Go family. GALR1 is expressed in the brain, spinal cord, small intestine, and heart.	GO:0051464 positive regulation of cortisol secretion;GO:2000851 positive regulation of glucocorticoid secretion;GO:0051462 regulation of cortisol secretion	GO:0005886 plasma membrane;GO:0071944 cell periphery;GO:0016020 membrane	[GO:0023052] signaling; [GO:0060089] molecular transducer activity; [GO:0005886] plasma membrane; [GO:0006351] DNA-templated transcription; [GO:0006355] regulation of DNA-templated transcription; [GO:0050886] endocrine process	GO:0004966 galanin receptor activity;GO:0042923 neuropeptide binding;GO:0008188 neuropeptide receptor activity		G-protein coupled receptors:GPCRs excl olfactory receptors	Plasma membrane (Supported)			yes	yes		(hsa04080)Neuroactive ligand-receptor interaction	0		1.0	0.0	0.0	0.0	1.0	0.0	0.0	0.0	0.0	0.0	0.0	0.0	0.0	0.0	0.0	0.0	0.0	0.0	1.0	0.0
SLIT2	9353	symbol	H. sapiens	9353	H. sapiens	SLIT2	slit guidance ligand 2	This gene encodes a member of the slit family of secreted glycoproteins, which are ligands for the Robo family of immunoglobulin receptors. Slit proteins play highly conserved roles in axon guidance and neuronal migration and may also have functions during other cell migration processes including leukocyte migration. Members of the slit family are characterized by an N-terminal signal peptide, fo…	SLIT2 is a gene that encodes a secreted glycoprotein belonging to the slit family. These proteins act as ligands for the Robo family of immunoglobulin receptors and play a crucial role in axon guidance and neuronal migration. They may also be involved in other cell migration processes, including leukocyte migration. SLIT2 is characterized by an N-terminal signal peptide, four leucine-rich repeats…	GO:0021972 corticospinal neuron axon guidance through spinal cord;GO:0050924 positive regulation of negative chemotaxis;GO:0050929 induction of negative chemotaxis	GO:0070062 extracellular exosome;GO:1903561 extracellular vesicle;GO:0043230 extracellular organelle	[GO:0005576] extracellular region; [GO:0005615] extracellular space; [GO:0030154] cell differentiation; [GO:0048856] anatomical structure development; [GO:0043226] organelle; [GO:0012501] programmed cell death; [GO:0048870] cell motility; [GO:0036211] protein modification process; [GO:0003013] circulatory system process; [GO:0098772] molecular function regulator activity; [GO:0002376] immune syst…	GO:0043237 laminin-1 binding;GO:0048495 Roundabout binding;GO:0005095 GTPase inhibitor activity		Predicted secreted proteins; Predicted intracellular proteins		yes	yes			(M33)PID GLYPICAN 1PATHWAY; (M3008)NABA ECM GLYCOPROTEINS; (M5884)NABA CORE MATRISOME	(hsa04360)Axon guidance	1	GO:0090260,GO:0090259,GO:0031290,GO:0021988,GO:0030900,GO:0007420,GO:0007417	0.0	0.0	1.0	0.0	0.0	1.0	1.0	1.0	0.0	1.0	0.0	0.0	0.0	1.0	1.0	1.0	0.0	0.0	0.0	0.0
FAT4	79633	symbol	H. sapiens	79633	H. sapiens	FAT4	FAT atypical cadherin 4	The protein encoded by this gene is a member of the protocadherin family. This gene may play a role in regulating planar cell polarity (PCP). Studies in mice suggest that loss of PCP signaling may cause cystic kidney disease, and mutations in this gene have been associated with Van Maldergem Syndrome 2. Alternatively spliced transcript variants have been noted for this gene. [provided by RefSeq, …	FAT4 is a gene that encodes a protein belonging to the protocadherin family. This gene may be involved in regulating planar cell polarity (PCP). Studies in mice suggest that loss of PCP signaling may lead to cystic kidney disease, and mutations in this gene have been linked to Van Maldergem Syndrome 2. FAT4 has alternative spliced transcript variants.	GO:0035329 hippo signaling;GO:0007157 heterophilic cell-cell adhesion via plasma membrane cell adhesion molecules;GO:0021987 cerebral cortex development	GO:0070062 extracellular exosome;GO:1903561 extracellular vesicle;GO:0043230 extracellular organelle	[GO:0005886] plasma membrane; [GO:0007155] cell adhesion; [GO:0048856] anatomical structure development; [GO:0061024] membrane organization; [GO:0023052] signaling; [GO:0030154] cell differentiation; [GO:0043226] organelle; [GO:0005576] extracellular region; [GO:0005615] extracellular space	GO:0005509 calcium ion binding;GO:0046872 metal ion binding;GO:0043169 cation binding		Human disease related genes:Congenital malformations:Other congenital malformations; Human disease related genes:Congenital malformations:Congenital malformations of the musculoskeletal system; Cancer-related genes; Disease related genes	Cytosol (Approved)			yes	yes		(hsa04392)Hippo signaling pathway - multiple species	1	GO:0030900,GO:0007420,GO:0007417	0.0	0.0	1.0	0.0	0.0	1.0	0.0	0.0	0.0	0.0	1.0	0.0	0.0	0.0	0.0	0.0	0.0	0.0	0.0	0.0
OBFC2A	64859	gene_synonym	H. sapiens	64859	H. sapiens	NABP1	nucleic acid binding protein 1	Single-stranded DNA (ssDNA)-binding proteins, such as OBFC2A, are ubiquitous and essential for a variety of DNA metabolic processes, including replication, recombination, and detection and repair of damage (Richard et al., 2008 [PubMed 18449195]).[supplied by OMIM, Jun 2008]	NABP1, also known as nucleic acid binding protein 1, is a single-stranded DNA-binding protein that is essential for various DNA metabolic processes, including replication, recombination, and detection and repair of damage. The protein is ubiquitous and plays a crucial role in maintaining the integrity of the genome. It binds to single-stranded DNA and helps in the recognition and repair of DNA da…	GO:0044818 mitotic G2/M transition checkpoint;GO:0010972 negative regulation of G2/M transition of mitotic cell cycle;GO:1902750 negative regulation of cell cycle G2/M phase transition	GO:0070876 SOSS complex;GO:0035861 site of double-strand break;GO:0090734 site of DNA damage	[GO:0043226] organelle; [GO:0005694] chromosome; [GO:0005634] nucleus; [GO:0005654] nucleoplasm; [GO:0005829] cytosol; [GO:0003677] DNA binding; [GO:0006281] DNA repair; [GO:0006310] DNA recombination; [GO:0023052] signaling; [GO:0000278] mitotic cell cycle; [GO:0003723] RNA binding	GO:0003697 single-stranded DNA binding;GO:0003723 RNA binding;GO:0003677 DNA binding		Predicted intracellular proteins	Nucleoplasm (Enhanced); Additional: Cytosol							0		0.0	0.0	0.0	0.0	0.0	0.0	0.0	0.0	0.0	0.0	0.0	0.0	0.0	0.0	0.0	0.0	0.0	0.0	0.0	0.0
A_32_P93493						None	None	None	None	None	None	None	None	None	None	None	None	None	None	None	None	None	None	None	nan	nan	nan	nan	nan	nan	nan	nan	nan	nan	nan	nan	nan	nan	nan	nan	nan	nan	nan	nan
A_24_P153035						None	None	None	None	None	None	None	None	None	None	None	None	None	None	None	None	None	None	None	nan	nan	nan	nan	nan	nan	nan	nan	nan	nan	nan	nan	nan	nan	nan	nan	nan	nan	nan	nan
GUCA1C	9626	symbol	H. sapiens	9626	H. sapiens	GUCA1C	guanylate cyclase activator 1C	Predicted to enable calcium ion binding activity and calcium sensitive guanylate cyclase activator activity. Predicted to be involved in signal transduction. Predicted to be located in photoreceptor disc membrane. [provided by Alliance of Genome Resources, Apr 2022]	The human gene GUCA1C is predicted to have calcium ion binding activity and calcium sensitive guanylate cyclase activator activity. It is also predicted to be involved in signal transduction and located in the photoreceptor disc membrane.	GO:0007601 visual perception;GO:0050953 sensory perception of light stimulus;GO:0007600 sensory perception	GO:0097381 photoreceptor disc membrane;GO:0001750 photoreceptor outer segment;GO:0097733 photoreceptor cell cilium	[GO:0050877] nervous system process; [GO:0098772] molecular function regulator activity; [GO:0055086] nucleobase-containing small molecule metabolic process; [GO:0023052] signaling; [GO:0043226] organelle; [GO:0005929] cilium	GO:0008048 calcium sensitive guanylate cyclase activator activity;GO:0030250 guanylate cyclase activator activity;GO:0030249 guanylate cyclase regulator activity		Predicted intracellular proteins	Focal adhesion sites (Approved)					(M117)PID CONE PATHWAY; (M204)PID RHODOPSIN PATHWAY	(hsa04744)Phototransduction	0		0.0	0.0	1.0	0.0	0.0	0.0	0.0	0.0	0.0	0.0	0.0	0.0	0.0	0.0	0.0	0.0	0.0	0.0	0.0	0.0
PLXNC1	10154	symbol	H. sapiens	10154	H. sapiens	PLXNC1	plexin C1	This gene encodes a member of the plexin family. Plexins are transmembrane receptors for semaphorins, a large family of proteins that regulate axon guidance, cell motility and migration, and the immune response. The encoded protein and its ligand regulate melanocyte adhesion, and viral semaphorins may modulate the immune response by binding to this receptor. The encoded protein may be a tumor sup…	PLXNC1 is a gene that encodes a transmembrane receptor for semaphorins, a family of proteins that regulate various cellular processes such as axon guidance, cell motility, migration, and immune response. The encoded protein and its ligand are involved in regulating melanocyte adhesion, and viral semaphorins may modulate the immune response by binding to this receptor. Additionally, PLXNC1 may act…	GO:1905806 regulation of synapse pruning;GO:1902287 semaphorin-plexin signaling pathway involved in axon guidance;GO:1902285 semaphorin-plexin signaling pathway involved in neuron projection guidance	GO:0150053 cerebellar climbing fiber to Purkinje cell synapse;GO:0002116 semaphorin receptor complex;GO:0098985 asymmetric, glutamatergic, excitatory synapse	[GO:0023052] signaling; [GO:0060089] molecular transducer activity; [GO:0005886] plasma membrane; [GO:0048870] cell motility; [GO:0048856] anatomical structure development; [GO:0007155] cell adhesion; [GO:0030154] cell differentiation; [GO:0034330] cell junction organization	GO:0017154 semaphorin receptor activity;GO:0004888 transmembrane signaling receptor activity;GO:0005102 signaling receptor binding		CD markers; Predicted intracellular proteins	Mitochondria (Approved)			yes	yes	(M5880)NABA ECM AFFILIATED; (M5885)NABA MATRISOME ASSOCIATED; (M5889)NABA MATRISOME	(hsa04360)Axon guidance	0		0.0	0.0	0.0	0.0	0.0	0.0	1.0	0.0	0.0	0.0	1.0	0.0	0.0	0.0	0.0	0.0	0.0	0.0	0.0	0.0
A_32_P194704						None	None	None	None	None	None	None	None	None	None	None	None	None	None	None	None	None	None	None	nan	nan	nan	nan	nan	nan	nan	nan	nan	nan	nan	nan	nan	nan	nan	nan	nan	nan	nan	nan
BHMT	635	symbol	H. sapiens	635	H. sapiens	BHMT	betaine--homocysteine S-methyltransferase	This gene encodes a cytosolic enzyme that catalyzes the conversion of betaine and homocysteine to dimethylglycine and methionine, respectively. Defects in this gene could lead to hyperhomocyst(e)inemia, but such a defect has not yet been observed. [provided by RefSeq, Jul 2008]	The BHMT gene encodes an enzyme that converts betaine and homocysteine into dimethylglycine and methionine, respectively. If there are defects in this gene, it could lead to hyperhomocyst(e)inemia, which is a condition where there are high levels of homocysteine in the blood. However, such a defect has not yet been observed. The BHMT enzyme is found in the cytosol of cells.	GO:0050666 regulation of homocysteine metabolic process;GO:0071266 'de novo' L-methionine biosynthetic process;GO:0031335 regulation of sulfur amino acid metabolic process	GO:0070062 extracellular exosome;GO:1903561 extracellular vesicle;GO:0043230 extracellular organelle	[GO:0003824] catalytic activity; [GO:0016740] transferase activity; [GO:0006520] cellular amino acid metabolic process; [GO:0006790] sulfur compound metabolic process; [GO:0043226] organelle; [GO:0005634] nucleus; [GO:0005829] cytosol; [GO:0036211] protein modification process; [GO:0005576] extracellular region; [GO:0005615] extracellular space; [GO:0006575] cellular modified amino acid metabolic…	GO:0047150 betaine-homocysteine S-methyltransferase activity;GO:0008172 S-methyltransferase activity;GO:0008168 methyltransferase activity		Enzymes; ENZYME proteins:Transferases; Predicted intracellular proteins	Cytosol (Approved)						(hsa00260)Glycine, serine and threonine metabolism; (hsa00270)Cysteine and methionine metabolism; (hsa01100)Metabolic pathways	0		0.0	0.0	0.0	0.0	0.0	0.0	0.0	0.0	0.0	0.0	0.0	1.0	0.0	0.0	0.0	0.0	0.0	0.0	0.0	0.0
ARHGAP6	395	symbol	H. sapiens	395	H. sapiens	ARHGAP6	Rho GTPase activating protein 6	This gene encodes a member of the rhoGAP family of proteins which play a role in the regulation of actin polymerization at the plasma membrane during several cellular processes. This protein is thought to have two independent functions, one as a GTPase-activating protein with specificity for RhoA, and another as a cytoskeletal protein that promotes actin remodeling. Multiple alternatively spliced…	ARHGAP6 is a gene that encodes a protein belonging to the rhoGAP family. This protein plays a crucial role in regulating actin polymerization at the plasma membrane during various cellular processes. The protein has two distinct functions, one as a GTPase-activating protein that specifically targets RhoA, and the other as a cytoskeletal protein that promotes actin remodeling. The gene has multipl…	GO:0051895 negative regulation of focal adhesion assembly;GO:0150118 negative regulation of cell-substrate junction organization;GO:0048041 focal adhesion assembly	GO:0005884 actin filament;GO:0015629 actin cytoskeleton;GO:0099513 polymeric cytoskeletal fiber	[GO:0023052] signaling; [GO:0098772] molecular function regulator activity; [GO:0007010] cytoskeleton organization; [GO:0005829] cytosol; [GO:0065003] protein-containing complex assembly; [GO:0043226] organelle; [GO:0005856] cytoskeleton; [GO:0007155] cell adhesion; [GO:0034330] cell junction organization	GO:0016004 phospholipase activator activity;GO:0060229 lipase activator activity;GO:0043274 phospholipase binding		Predicted intracellular proteins	Cytosol (Supported)					(M68)PID RHOA REG PATHWAY		0		0.0	0.0	0.0	0.0	0.0	0.0	0.0	0.0	0.0	0.0	1.0	0.0	0.0	0.0	0.0	0.0	1.0	0.0	0.0	0.0
INSM1	3642	symbol	H. sapiens	3642	H. sapiens	INSM1	INSM transcriptional repressor 1	Insulinoma-associated 1 (INSM1) gene is intronless and encodes a protein containing both a zinc finger DNA-binding domain and a putative prohormone domain. This gene is a sensitive marker for neuroendocrine differentiation of human lung tumors. [provided by RefSeq, Jul 2008]	The INSM1 gene is a gene that does not contain introns and produces a protein with a zinc finger DNA-binding domain and a putative prohormone domain. It is a sensitive marker for neuroendocrine differentiation of human lung tumors.	GO:0061104 adrenal chromaffin cell differentiation;GO:0003358 noradrenergic neuron development;GO:0060290 transdifferentiation	GO:0017053 transcription repressor complex;GO:0005667 transcription regulator complex;GO:0005654 nucleoplasm	[GO:0006351] DNA-templated transcription; [GO:0006355] regulation of DNA-templated transcription; [GO:0140110] transcription regulator activity; [GO:0043226] organelle; [GO:0005634] nucleus; [GO:0003677] DNA binding; [GO:0030154] cell differentiation; [GO:0048856] anatomical structure development; [GO:0005654] nucleoplasm; [GO:0065003] protein-containing complex assembly; [GO:0036211] protein mod…	GO:0030332 cyclin binding;GO:0031490 chromatin DNA binding;GO:0042826 histone deacetylase binding		Transcription factors:Zinc-coordinating DNA-binding domains; Predicted intracellular proteins								0		0.0	0.0	0.0	0.0	0.0	0.0	0.0	0.0	0.0	0.0	0.0	1.0	0.0	1.0	1.0	0.0	0.0	0.0	0.0	0.0
C1QL1	10882	symbol	H. sapiens	10882	H. sapiens	C1QL1	complement C1q like 1	Predicted to enable signaling receptor binding activity. Predicted to act upstream of or within maintenance of synapse structure; motor learning; and neuron remodeling. Predicted to be located in several cellular components, including climbing fiber; presynapse; and synaptic cleft. Predicted to be part of collagen trimer. [provided by Alliance of Genome Resources, Apr 2022]	C1QL1 is a human gene that is predicted to have signaling receptor binding activity and play a role in maintaining synapse structure, motor learning, and neuron remodeling. It is also predicted to be located in several cellular components, including climbing fiber, presynapse, and synaptic cleft. Additionally, it is predicted to be part of collagen trimer.	GO:1905806 regulation of synapse pruning;GO:0061743 motor learning;GO:0016322 neuron remodeling	GO:0044301 climbing fiber;GO:0150053 cerebellar climbing fiber to Purkinje cell synapse;GO:0098985 asymmetric, glutamatergic, excitatory synapse	[GO:0005576] extracellular region; [GO:0005615] extracellular space; [GO:0048856] anatomical structure development; [GO:0030154] cell differentiation; [GO:0050877] nervous system process; [GO:0034330] cell junction organization	GO:0005102 signaling receptor binding;GO:0005515 protein binding;GO:0005488 binding		Predicted secreted proteins	Vesicles (Approved); Additional: Cytosol	yes	yes			(M5880)NABA ECM AFFILIATED; (M5885)NABA MATRISOME ASSOCIATED; (M5889)NABA MATRISOME		0		0.0	0.0	0.0	1.0	0.0	0.0	0.0	0.0	0.0	0.0	1.0	0.0	0.0	0.0	0.0	0.0	1.0	0.0	0.0	0.0
A_24_P925505						None	None	None	None	None	None	None	None	None	None	None	None	None	None	None	None	None	None	None	nan	nan	nan	nan	nan	nan	nan	nan	nan	nan	nan	nan	nan	nan	nan	nan	nan	nan	nan	nan
KCNK12	56660	symbol	H. sapiens	56660	H. sapiens	KCNK12	potassium two pore domain channel subfamily K member 12	This gene encodes one of the members of the superfamily of potassium channel proteins containing two pore-forming P domains. The product of this gene has not been shown to be a functional channel, however, it may require other non-pore-forming proteins for activity. [provided by RefSeq, Jul 2008]	The KCNK12 gene belongs to the family of potassium channel proteins that have two pore-forming P domains. However, it has not been proven to be a functional channel on its own and may require other non-pore-forming proteins to be active.	GO:0030322 stabilization of membrane potential;GO:0071805 potassium ion transmembrane transport;GO:0006813 potassium ion transport	GO:0016020 membrane;GO:0110165 cellular anatomical entity;GO:0005575 cellular_component	[GO:0005215] transporter activity; [GO:0055085] transmembrane transport; [GO:0005886] plasma membrane	GO:0022841 potassium ion leak channel activity;GO:0022840 leak channel activity;GO:0022842 narrow pore channel activity		Voltage-gated ion channels:Two-P Potassium Channels				yes	yes			0		0.0	1.0	0.0	0.0	0.0	0.0	0.0	0.0	0.0	0.0	0.0	0.0	0.0	0.0	0.0	0.0	0.0	1.0	0.0	0.0
SLC18A2	6571	symbol	H. sapiens	6571	H. sapiens	SLC18A2	solute carrier family 18 member A2	This gene encodes an transmembrane protein that functions as an ATP-dependent transporter of monoamines, such as dopamine, norepinephrine, serotonin, and histamine. This protein transports amine neurotransmitters into synaptic vesicles. Polymorphisms in this gene may be associated with schizophrenia, bipolar disorder, and other neurological/psychiatric ailments. [provided by RefSeq, Jun 2018]	SLC18A2 is a gene that encodes a protein that acts as a transporter of monoamines, including dopamine, norepinephrine, serotonin, and histamine. This protein is responsible for transporting these neurotransmitters into synaptic vesicles. Polymorphisms in this gene have been linked to various neurological and psychiatric disorders, such as schizophrenia and bipolar disorder.	GO:0002552 serotonin secretion by mast cell;GO:0042137 sequestering of neurotransmitter;GO:0099123 somato-dendritic dopamine secretion	GO:0070081 clathrin-sculpted monoamine transport vesicle;GO:0070083 clathrin-sculpted monoamine transport vesicle membrane;GO:0060198 clathrin-sculpted vesicle	[GO:0055085] transmembrane transport; [GO:0005215] transporter activity; [GO:0031410] cytoplasmic vesicle; [GO:0043226] organelle; [GO:0005856] cytoskeleton; [GO:0005815] microtubule organizing center; [GO:0005886] plasma membrane; [GO:0023052] signaling; [GO:0016192] vesicle-mediated transport; [GO:0002376] immune system process; [GO:0006954] inflammatory response; [GO:0048856] anatomical struct…	GO:0005335 serotonin:sodium:chloride symporter activity;GO:0015311 monoamine:proton antiporter activity;GO:0008504 monoamine transmembrane transporter activity		Transporters:Electrochemical Potential-driven transporters; FDA approved drug targets:Small molecule drugs; Disease related genes	Centrosome;Vesicles (Approved)			yes	yes		(hsa05030)Cocaine addiction; (hsa05031)Amphetamine addiction; (hsa04721)Synaptic vesicle cycle	1	hsa05031,hsa04728	0.0	1.0	0.0	1.0	1.0	0.0	0.0	0.0	0.0	0.0	0.0	0.0	0.0	0.0	0.0	0.0	0.0	0.0	1.0	0.0
A_32_P136776						None	None	None	None	None	None	None	None	None	None	None	None	None	None	None	None	None	None	None	nan	nan	nan	nan	nan	nan	nan	nan	nan	nan	nan	nan	nan	nan	nan	nan	nan	nan	nan	nan
CAPSL	133690	symbol	H. sapiens	133690	H. sapiens	CAPSL	calcyphosine like	Predicted to enable calcium ion binding activity. Predicted to be located in cytoplasm. [provided by Alliance of Genome Resources, Apr 2022]	CAPSL (calcyphosine like) is a human gene that is predicted to have calcium ion binding activity and is located in the cytoplasm. The function of this gene is not yet fully understood, but it is believed to play a role in calcium signaling pathways. CAPSL is a relatively new gene and further research is needed to fully understand its function and potential implications for human health.		GO:0005737 cytoplasm;GO:0005622 intracellular anatomical structure;GO:0110165 cellular anatomical entity		GO:0005509 calcium ion binding;GO:0046872 metal ion binding;GO:0043169 cation binding		Predicted intracellular proteins	Microtubules (Approved); Additional: Nucleoplasm							0		0.0	0.0	1.0	0.0	0.0	0.0	0.0	0.0	0.0	0.0	0.0	0.0	0.0	0.0	0.0	0.0	0.0	0.0	0.0	0.0
LIX1	167410	symbol	H. sapiens	167410	H. sapiens	LIX1	limb and CNS expressed 1	Predicted to be involved in autophagosome maturation. Predicted to be active in cytoplasm. [provided by Alliance of Genome Resources, Apr 2022]	LIX1, or Limb and CNS Expressed 1, is a human gene that is predicted to play a role in autophagosome maturation. It is believed to be active in the cytoplasm. Autophagosome maturation is a process by which cells break down and recycle their own components, and it is important for maintaining cellular health. LIX1 is expressed in both the limbs and the central nervous system, suggesting that it ma…	GO:0097352 autophagosome maturation;GO:0032984 protein-containing complex disassembly;GO:0016236 macroautophagy	GO:0005737 cytoplasm;GO:0005622 intracellular anatomical structure;GO:0110165 cellular anatomical entity	[GO:0006914] autophagy	GO:0005515 protein binding;GO:0005488 binding;GO:0003674 molecular_function		Predicted intracellular proteins	Cytosol (Approved); Additional: Cytokinetic bridge;Vesicles							0		0.0	0.0	0.0	0.0	0.0	0.0	0.0	0.0	0.0	0.0	0.0	0.0	0.0	0.0	0.0	0.0	0.0	0.0	0.0	0.0
OVCH1	341350	symbol	H. sapiens	341350	H. sapiens	OVCH1	ovochymase 1	Predicted to enable metal ion binding activity and serine-type endopeptidase activity. Predicted to be involved in proteolysis. Predicted to be located in extracellular region. Predicted to be active in plasma membrane. [provided by Alliance of Genome Resources, Apr 2022]	OVCH1, also known as ovochymase 1, is a human gene that is predicted to have metal ion binding activity and serine-type endopeptidase activity. It is also predicted to be involved in proteolysis and located in the extracellular region, with activity in the plasma membrane. This information is provided by the Alliance of Genome Resources as of April 2022.	GO:0006508 proteolysis;GO:0019538 protein metabolic process;GO:1901564 organonitrogen compound metabolic process	GO:0005576 extracellular region;GO:0110165 cellular anatomical entity;GO:0005575 cellular_component	[GO:0003824] catalytic activity; [GO:0016787] hydrolase activity; [GO:0140096] catalytic activity, acting on a protein; [GO:0005576] extracellular region; [GO:0005886] plasma membrane	GO:0004252 serine-type endopeptidase activity;GO:0008236 serine-type peptidase activity;GO:0017171 serine hydrolase activity		Predicted secreted proteins; Enzymes; Predicted intracellular proteins; Peptidases:Serine-type peptidases			yes					0		0.0	0.0	0.0	0.0	0.0	0.0	0.0	0.0	0.0	0.0	0.0	0.0	0.0	0.0	0.0	0.0	0.0	0.0	0.0	0.0
PCDH18	54510	symbol	H. sapiens	54510	H. sapiens	PCDH18	protocadherin 18	This gene belongs to the protocadherin gene family, a subfamily of the cadherin superfamily. This gene encodes a protein which contains 6 extracellular cadherin domains, a transmembrane domain and a cytoplasmic tail differing from those of the classical cadherins. Although its specific function is undetermined, the cadherin-related neuronal receptor is thought to play a role in the establishment …	PCDH18 is a gene that belongs to the protocadherin gene family and encodes a protein with 6 extracellular cadherin domains, a transmembrane domain, and a cytoplasmic tail that differs from classical cadherins. The specific function of PCDH18 is unknown, but it is thought to play a role in establishing and maintaining specific cell-cell connections in the brain. The protein is a cadherin-related n…	GO:0007156 homophilic cell adhesion via plasma membrane adhesion molecules;GO:0098742 cell-cell adhesion via plasma-membrane adhesion molecules;GO:0098609 cell-cell adhesion	GO:0005886 plasma membrane;GO:0071944 cell periphery;GO:0016020 membrane	[GO:0005886] plasma membrane; [GO:0007155] cell adhesion; [GO:0048856] anatomical structure development	GO:0005509 calcium ion binding;GO:0046872 metal ion binding;GO:0043169 cation binding		Predicted intracellular proteins	Cytosol (Approved); Additional: Golgi apparatus			yes	yes			1	GO:0007420,GO:0007417	0.0	0.0	1.0	0.0	0.0	0.0	0.0	0.0	0.0	0.0	1.0	0.0	0.0	0.0	0.0	0.0	0.0	0.0	0.0	0.0
LOC100129291	100129291	Gene_ID	H. sapiens	100129291	H. sapiens	LOC100129291	chromosome X open reading frame 49 pseudogene																0		0.0	0.0	0.0	0.0	0.0	0.0	0.0	0.0	0.0	0.0	0.0	0.0	0.0	0.0	0.0	0.0	0.0	0.0	0.0	0.0

## Sheet: Enrichment
GroupID	Category	Term	Description	LogP	Log(q-value)	Genes	Symbols	InTerm_InList
1_Summary	KEGG Pathway	hsa04080	Neuroactive ligand-receptor interaction	-12.5301	-8.14414	623,1134,1392,2554,2587,2693,2897,4922,4986,5173,5737,6751,10888,10911,51083,55879,208,846,2786,2863,9162,80326,948	BDKRB1,CHRNA1,CRH,GABRA1,GALR1,GHSR,GRIK1,NTS,OPRK1,PDYN,PTGFR,SSTR1,GPR83,UTS2,GAL,GABRQ,AKT2,CASR,GNG4,GPR39,DGKI,WNT10A,CD36	23/-
1_Member	KEGG Pathway	hsa04080	Neuroactive ligand-receptor interaction	-12.5301	-8.14414	623,1134,1392,2554,2587,2693,2897,4922,4986,5173,5737,6751,10888,10911,51083,55879	BDKRB1,CHRNA1,CRH,GABRA1,GALR1,GHSR,GRIK1,NTS,OPRK1,PDYN,PTGFR,SSTR1,GPR83,UTS2,GAL,GABRQ	16/367
1_Member	Reactome Gene Sets	R-HSA-372790	Signaling by GPCR	-10.133	-6.52519	208,623,846,1392,2587,2693,2786,2863,4922,4986,5173,5737,6751,9162,10888,10911,51083,80326	AKT2,BDKRB1,CASR,CRH,GALR1,GHSR,GNG4,GPR39,NTS,OPRK1,PDYN,PTGFR,SSTR1,DGKI,GPR83,UTS2,GAL,WNT10A	18/710
1_Member	Reactome Gene Sets	R-HSA-388396	GPCR downstream signalling	-9.94495	-6.40412	208,623,846,1392,2587,2693,2786,2863,4922,4986,5173,5737,6751,9162,10888,10911,51083	AKT2,BDKRB1,CASR,CRH,GALR1,GHSR,GNG4,GPR39,NTS,OPRK1,PDYN,PTGFR,SSTR1,DGKI,GPR83,UTS2,GAL	17/635
1_Member	Reactome Gene Sets	R-HSA-500792	GPCR ligand binding	-9.86837	-6.38553	623,846,1392,2587,2693,2786,2863,4922,4986,5173,5737,6751,10911,51083,80326	BDKRB1,CASR,CRH,GALR1,GHSR,GNG4,GPR39,NTS,OPRK1,PDYN,PTGFR,SSTR1,UTS2,GAL,WNT10A	15/469
1_Member	Reactome Gene Sets	R-HSA-373076	Class A/1 (Rhodopsin-like receptors)	-7.44687	-4.10234	623,2587,2693,2863,4922,4986,5173,5737,6751,10911,51083	BDKRB1,GALR1,GHSR,GPR39,NTS,OPRK1,PDYN,PTGFR,SSTR1,UTS2,GAL	11/336
1_Member	Reactome Gene Sets	R-HSA-375276	Peptide ligand-binding receptors	-7.32911	-4.05713	623,2587,2693,4922,4986,5173,6751,10911,51083	BDKRB1,GALR1,GHSR,NTS,OPRK1,PDYN,SSTR1,UTS2,GAL	9/201
1_Member	Reactome Gene Sets	R-HSA-416476	G alpha (q) signalling events	-7.04435	-3.80455	623,846,2693,2786,2863,4922,5737,9162,10911	BDKRB1,CASR,GHSR,GNG4,GPR39,NTS,PTGFR,DGKI,UTS2	9/217
1_Member	GO Biological Processes	GO:0007218	neuropeptide signaling pathway	-6.84449	-3.63465	2587,4922,4986,5173,6751,10888,51083	GALR1,NTS,OPRK1,PDYN,SSTR1,GPR83,GAL	7/110
1_Member	GO Molecular Functions	GO:0008528	G protein-coupled peptide receptor activity	-5.34594	-2.41166	623,2587,4986,6751,10888,51083	BDKRB1,GALR1,OPRK1,SSTR1,GPR83,GAL	6/119
1_Member	WikiPathways	WP455	GPCRs, class A rhodopsin-like	-5.33519	-2.41166	623,2587,2693,2863,4986,5737,6751,10888	BDKRB1,GALR1,GHSR,GPR39,OPRK1,PTGFR,SSTR1,GPR83	8/261
1_Member	GO Molecular Functions	GO:0001653	peptide receptor activity	-5.22257	-2.35515	623,2587,4986,6751,10888,51083	BDKRB1,GALR1,OPRK1,SSTR1,GPR83,GAL	6/125
1_Member	WikiPathways	WP24	Peptide GPCRs	-5.09762	-2.27989	623,2587,2693,4986,6751	BDKRB1,GALR1,GHSR,OPRK1,SSTR1	5/76
1_Member	Reactome Gene Sets	R-HSA-418594	G alpha (i) signalling events	-4.70331	-1.96083	623,846,2587,2786,4986,5173,6751,51083	BDKRB1,CASR,GALR1,GNG4,OPRK1,PDYN,SSTR1,GAL	8/319
1_Member	GO Molecular Functions	GO:0008188	neuropeptide receptor activity	-4.61321	-1.91748	2587,6751,10888,51083	GALR1,SSTR1,GPR83,GAL	4/47
1_Member	GO Molecular Functions	GO:0042923	neuropeptide binding	-3.69105	-1.29099	2587,4986,6751	GALR1,OPRK1,SSTR1	3/32
1_Member	GO Molecular Functions	GO:0042277	peptide binding	-3.00501	-0.768297	623,948,2587,2693,4986,6751	BDKRB1,CD36,GALR1,GHSR,OPRK1,SSTR1	6/317
1_Member	GO Molecular Functions	GO:0033218	amide binding	-2.49232	-0.396423	623,948,2587,2693,4986,6751	BDKRB1,CD36,GALR1,GHSR,OPRK1,SSTR1	6/401
2_Summary	GO Biological Processes	GO:0007268	chemical synaptic transmission	-11.7669	-7.85812	1134,1392,2554,2897,3359,4986,5173,5816,6571,7162,10911,55879,116372,341359,404037,440279,2786,3084,3755,10611,27133,83988,208,948,54112,56660,360,846	CHRNA1,CRH,GABRA1,GRIK1,HTR3A,OPRK1,PDYN,PVALB,SLC18A2,TPBG,UTS2,GABRQ,LYPD1,SYT10,HAPLN4,UNC13C,GNG4,NRG1,KCNG1,PDLIM5,KCNH5,NCALD,AKT2,CD36,GPR88,KCNK12,AQP3,CASR	28/-
2_Member	GO Biological Processes	GO:0007268	chemical synaptic transmission	-11.7669	-7.85812	1134,1392,2554,2897,3359,4986,5173,5816,6571,7162,10911,55879,116372,341359,404037,440279	CHRNA1,CRH,GABRA1,GRIK1,HTR3A,OPRK1,PDYN,PVALB,SLC18A2,TPBG,UTS2,GABRQ,LYPD1,SYT10,HAPLN4,UNC13C	16/412
2_Member	GO Biological Processes	GO:0098916	anterograde trans-synaptic signaling	-11.7669	-7.85812	1134,1392,2554,2897,3359,4986,5173,5816,6571,7162,10911,55879,116372,341359,404037,440279	CHRNA1,CRH,GABRA1,GRIK1,HTR3A,OPRK1,PDYN,PVALB,SLC18A2,TPBG,UTS2,GABRQ,LYPD1,SYT10,HAPLN4,UNC13C	16/412
2_Member	GO Biological Processes	GO:0099537	trans-synaptic signaling	-11.5174	-7.73357	1134,1392,2554,2897,3359,4986,5173,5816,6571,7162,10911,55879,116372,341359,404037,440279	CHRNA1,CRH,GABRA1,GRIK1,HTR3A,OPRK1,PDYN,PVALB,SLC18A2,TPBG,UTS2,GABRQ,LYPD1,SYT10,HAPLN4,UNC13C	16/428
2_Member	GO Biological Processes	GO:0099536	synaptic signaling	-11.0904	-7.40345	1134,1392,2554,2897,3359,4986,5173,5816,6571,7162,10911,55879,116372,341359,404037,440279	CHRNA1,CRH,GABRA1,GRIK1,HTR3A,OPRK1,PDYN,PVALB,SLC18A2,TPBG,UTS2,GABRQ,LYPD1,SYT10,HAPLN4,UNC13C	16/457
2_Member	Reactome Gene Sets	R-HSA-112316	Neuronal System	-8.5561	-5.12442	1134,2554,2786,2897,3084,3359,3755,6571,10611,27133,55879,83988,341359	CHRNA1,GABRA1,GNG4,GRIK1,NRG1,HTR3A,KCNG1,SLC18A2,PDLIM5,KCNH5,GABRQ,NCALD,SYT10	13/410
2_Member	Reactome Gene Sets	R-HSA-112315	Transmission across Chemical Synapses	-6.24363	-3.13645	1134,2554,2786,2897,3084,3359,6571,55879,83988	CHRNA1,GABRA1,GNG4,GRIK1,NRG1,HTR3A,SLC18A2,GABRQ,NCALD	9/270
2_Member	Reactome Gene Sets	R-HSA-112314	Neurotransmitter receptors and postsynaptic signal transmission	-6.11584	-3.03094	1134,2554,2786,2897,3084,3359,55879,83988	CHRNA1,GABRA1,GNG4,GRIK1,NRG1,HTR3A,GABRQ,NCALD	8/205
2_Member	GO Biological Processes	GO:0042391	regulation of membrane potential	-5.40571	-2.45115	208,948,1134,2554,2897,3359,27133,54112,55879,56660	AKT2,CD36,CHRNA1,GABRA1,GRIK1,HTR3A,KCNH5,GPR88,GABRQ,KCNK12	10/437
2_Member	GO Molecular Functions	GO:0005230	extracellular ligand-gated monoatomic ion channel activity	-5.15468	-2.31571	1134,2554,2897,3359,55879	CHRNA1,GABRA1,GRIK1,HTR3A,GABRQ	5/74
2_Member	GO Molecular Functions	GO:0022839	monoatomic ion gated channel activity	-4.65505	-1.92408	1134,2554,2897,3359,3755,27133,55879,56660	CHRNA1,GABRA1,GRIK1,HTR3A,KCNG1,KCNH5,GABRQ,KCNK12	8/324
2_Member	GO Molecular Functions	GO:0022836	gated channel activity	-4.6455	-1.92408	1134,2554,2897,3359,3755,27133,55879,56660	CHRNA1,GABRA1,GRIK1,HTR3A,KCNG1,KCNH5,GABRQ,KCNK12	8/325
2_Member	GO Molecular Functions	GO:0030594	neurotransmitter receptor activity	-4.5593	-1.88094	1134,2554,2897,3359,55879	CHRNA1,GABRA1,GRIK1,HTR3A,GABRQ	5/98
2_Member	GO Molecular Functions	GO:0022824	transmitter-gated monoatomic ion channel activity	-4.19191	-1.61829	1134,2554,2897,3359	CHRNA1,GABRA1,GRIK1,HTR3A	4/60
2_Member	GO Molecular Functions	GO:0022835	transmitter-gated channel activity	-4.19191	-1.61829	1134,2554,2897,3359	CHRNA1,GABRA1,GRIK1,HTR3A	4/60
2_Member	GO Molecular Functions	GO:0015267	channel activity	-4.12241	-1.5811	360,1134,2554,2897,3359,3755,27133,55879,56660	AQP3,CHRNA1,GABRA1,GRIK1,HTR3A,KCNG1,KCNH5,GABRQ,KCNK12	9/497
2_Member	GO Molecular Functions	GO:0022803	passive transmembrane transporter activity	-4.11577	-1.5811	360,1134,2554,2897,3359,3755,27133,55879,56660	AQP3,CHRNA1,GABRA1,GRIK1,HTR3A,KCNG1,KCNH5,GABRQ,KCNK12	9/498
2_Member	GO Molecular Functions	GO:0015276	ligand-gated monoatomic ion channel activity	-3.73757	-1.31076	1134,2554,2897,3359,55879	CHRNA1,GABRA1,GRIK1,HTR3A,GABRQ	5/146
2_Member	GO Molecular Functions	GO:0005216	monoatomic ion channel activity	-3.73614	-1.31076	1134,2554,2897,3359,3755,27133,55879,56660	CHRNA1,GABRA1,GRIK1,HTR3A,KCNG1,KCNH5,GABRQ,KCNK12	8/439
2_Member	GO Molecular Functions	GO:0022834	ligand-gated channel activity	-3.72377	-1.30633	1134,2554,2897,3359,55879	CHRNA1,GABRA1,GRIK1,HTR3A,GABRQ	5/147
2_Member	GO Molecular Functions	GO:1904315	transmitter-gated monoatomic ion channel activity involved in regulation of postsynaptic membrane potential	-3.14029	-0.878217	1134,2554,2897	CHRNA1,GABRA1,GRIK1	3/49
2_Member	GO Molecular Functions	GO:0099529	neurotransmitter receptor activity involved in regulation of postsynaptic membrane potential	-3.08934	-0.843292	1134,2554,2897	CHRNA1,GABRA1,GRIK1	3/51
2_Member	GO Molecular Functions	GO:0005267	potassium channel activity	-2.99677	-0.763133	2897,3755,27133,56660	GRIK1,KCNG1,KCNH5,KCNK12	4/123
2_Member	GO Molecular Functions	GO:1901702	salt transmembrane transporter activity	-2.93122	-0.710786	360,2554,2897,3755,6571,27133,55879,56660	AQP3,GABRA1,GRIK1,KCNG1,SLC18A2,KCNH5,GABRQ,KCNK12	8/582
2_Member	GO Molecular Functions	GO:0015075	monoatomic ion transmembrane transporter activity	-2.92785	-0.710786	1134,2554,2897,3359,3755,6571,27133,55879,56660	CHRNA1,GABRA1,GRIK1,HTR3A,KCNG1,SLC18A2,KCNH5,GABRQ,KCNK12	9/725
2_Member	GO Molecular Functions	GO:0005261	monoatomic cation channel activity	-2.91561	-0.705771	1134,2897,3359,3755,27133,56660	CHRNA1,GRIK1,HTR3A,KCNG1,KCNH5,KCNK12	6/330
2_Member	GO Molecular Functions	GO:0098960	postsynaptic neurotransmitter receptor activity	-2.76428	-0.603666	1134,2554,2897	CHRNA1,GABRA1,GRIK1	3/66
2_Member	GO Molecular Functions	GO:0015079	potassium ion transmembrane transporter activity	-2.58845	-0.467342	2897,3755,27133,56660	GRIK1,KCNG1,KCNH5,KCNK12	4/159
2_Member	GO Molecular Functions	GO:0015318	inorganic molecular entity transmembrane transporter activity	-2.47712	-0.383444	360,2554,2897,3755,6571,27133,55879,56660	AQP3,GABRA1,GRIK1,KCNG1,SLC18A2,KCNH5,GABRQ,KCNK12	8/689
2_Member	GO Biological Processes	GO:0098660	inorganic ion transmembrane transport	-2.3166	-0.295602	846,2554,3359,3755,6571,27133,55879,56660	CASR,GABRA1,HTR3A,KCNG1,SLC18A2,KCNH5,GABRQ,KCNK12	8/733
2_Member	GO Biological Processes	GO:0060078	regulation of postsynaptic membrane potential	-2.23027	-0.224549	1134,2554,2897	CHRNA1,GABRA1,GRIK1	3/102
2_Member	GO Molecular Functions	GO:0008324	monoatomic cation transmembrane transporter activity	-2.22411	-0.221997	1134,2897,3359,3755,6571,27133,56660	CHRNA1,GRIK1,HTR3A,KCNG1,SLC18A2,KCNH5,KCNK12	7/603
2_Member	GO Molecular Functions	GO:0099094	ligand-gated monoatomic cation channel activity	-2.15076	-0.181468	1134,2897,3359	CHRNA1,GRIK1,HTR3A	3/109
3_Summary	GO Molecular Functions	GO:0005509	calcium ion binding	-7.47921	-4.10234	846,5816,9353,9626,10016,23105,54510,56128,79180,79633,83988,133690,255743,341359,440279	CASR,PVALB,SLIT2,GUCA1C,PDCD6,FSTL4,PCDH18,PCDHB8,EFHD2,FAT4,NCALD,CAPSL,NPNT,SYT10,UNC13C	15/-
3_Member	GO Molecular Functions	GO:0005509	calcium ion binding	-7.47921	-4.10234	846,5816,9353,9626,10016,23105,54510,56128,79180,79633,83988,133690,255743,341359,440279	CASR,PVALB,SLIT2,GUCA1C,PDCD6,FSTL4,PCDH18,PCDHB8,EFHD2,FAT4,NCALD,CAPSL,NPNT,SYT10,UNC13C	15/705
4_Summary	GO Biological Processes	GO:0007610	behavior	-7.4003	-4.09355	846,1392,2693,4986,5176,6571,7162,10882,10888,27286,51083,54112,116372,644139,341359,5816,3084,208,948	CASR,CRH,GHSR,OPRK1,SERPINF1,SLC18A2,TPBG,C1QL1,GPR83,SRPX2,GAL,GPR88,LYPD1,PIRT,SYT10,PVALB,NRG1,AKT2,CD36	19/-
4_Member	GO Biological Processes	GO:0007610	behavior	-7.4003	-4.09355	846,1392,2693,4986,5176,6571,7162,10882,10888,27286,51083,54112,116372,644139	CASR,CRH,GHSR,OPRK1,SERPINF1,SLC18A2,TPBG,C1QL1,GPR83,SRPX2,GAL,GPR88,LYPD1,PIRT	14/611
4_Member	GO Biological Processes	GO:0050433	regulation of catecholamine secretion	-4.27983	-1.66475	1392,2693,4986,341359	CRH,GHSR,OPRK1,SYT10	4/57
4_Member	GO Biological Processes	GO:0007611	learning or memory	-4.19696	-1.61829	1392,2693,4986,5176,7162,10882,54112	CRH,GHSR,OPRK1,SERPINF1,TPBG,C1QL1,GPR88	7/277
4_Member	GO Biological Processes	GO:0048520	positive regulation of behavior	-3.91477	-1.43852	1392,2693,4986	CRH,GHSR,OPRK1	3/27
4_Member	GO Biological Processes	GO:0050890	cognition	-3.82481	-1.3683	1392,2693,4986,5176,7162,10882,54112	CRH,GHSR,OPRK1,SERPINF1,TPBG,C1QL1,GPR88	7/318
4_Member	GO Biological Processes	GO:0051952	regulation of amine transport	-3.36739	-1.03837	1392,2693,4986,341359	CRH,GHSR,OPRK1,SYT10	4/98
4_Member	GO Biological Processes	GO:0007626	locomotory behavior	-3.16147	-0.886825	1392,4986,6571,10882,54112	CRH,OPRK1,SLC18A2,C1QL1,GPR88	5/195
4_Member	Reactome Gene Sets	R-HSA-8986944	Transcriptional Regulation by MECP2	-2.84256	-0.65529	1392,4986,5816	CRH,OPRK1,PVALB	3/62
4_Member	GO Biological Processes	GO:0046888	negative regulation of hormone secretion	-2.78337	-0.614922	1392,2693,4986	CRH,GHSR,OPRK1	3/65
4_Member	GO Biological Processes	GO:0007612	learning	-2.64885	-0.518195	4986,7162,10882,54112	OPRK1,TPBG,C1QL1,GPR88	4/153
4_Member	GO Biological Processes	GO:0050795	regulation of behavior	-2.60539	-0.477145	1392,2693,4986	CRH,GHSR,OPRK1	3/75
4_Member	GO Biological Processes	GO:0051048	negative regulation of secretion	-2.39575	-0.331573	1392,2693,3084,4986	CRH,GHSR,NRG1,OPRK1	4/180
4_Member	GO Biological Processes	GO:0051051	negative regulation of transport	-2.09763	-0.143063	208,948,1392,2693,3084,4986	AKT2,CD36,CRH,GHSR,NRG1,OPRK1	6/485
5_Summary	GO Biological Processes	GO:0051464	positive regulation of cortisol secretion	-6.75283	-3.59735	1392,2587,51083,4986,3084,4922,5173,7276,10911,64388,80326,116372,208,948,9536,846,341359,2693,6571,56603,7139,255743	CRH,GALR1,GAL,OPRK1,NRG1,NTS,PDYN,TTR,UTS2,GREM2,WNT10A,LYPD1,AKT2,CD36,PTGES,CASR,SYT10,GHSR,SLC18A2,CYP26B1,TNNT2,NPNT	22/-
5_Member	GO Biological Processes	GO:0051464	positive regulation of cortisol secretion	-6.75283	-3.59735	1392,2587,51083	CRH,GALR1,GAL	3/4
5_Member	GO Biological Processes	GO:2000851	positive regulation of glucocorticoid secretion	-6.75283	-3.59735	1392,2587,51083	CRH,GALR1,GAL	3/4
5_Member	GO Biological Processes	GO:0051462	regulation of cortisol secretion	-6.35603	-3.22537	1392,2587,51083	CRH,GALR1,GAL	3/5
5_Member	GO Biological Processes	GO:2000848	positive regulation of corticosteroid hormone secretion	-5.81422	-2.79002	1392,2587,51083	CRH,GALR1,GAL	3/7
5_Member	GO Biological Processes	GO:2000849	regulation of glucocorticoid secretion	-5.2825	-2.39611	1392,2587,51083	CRH,GALR1,GAL	3/10
5_Member	GO Biological Processes	GO:2000833	positive regulation of steroid hormone secretion	-5.14533	-2.31571	1392,2587,51083	CRH,GALR1,GAL	3/11
5_Member	GO Biological Processes	GO:0044060	regulation of endocrine process	-4.93984	-2.1667	1392,2587,4986,51083	CRH,GALR1,OPRK1,GAL	4/39
5_Member	GO Biological Processes	GO:2000846	regulation of corticosteroid hormone secretion	-4.62028	-1.91748	1392,2587,51083	CRH,GALR1,GAL	3/16
5_Member	GO Molecular Functions	GO:0030545	signaling receptor regulator activity	-4.45697	-1.78704	1392,3084,4922,5173,7276,10911,51083,64388,80326,116372	CRH,NRG1,NTS,PDYN,TTR,UTS2,GAL,GREM2,WNT10A,LYPD1	10/563
5_Member	GO Biological Processes	GO:1905952	regulation of lipid localization	-4.28495	-1.66475	208,948,1392,2587,9536,51083	AKT2,CD36,CRH,GALR1,PTGES,GAL	6/183
5_Member	GO Biological Processes	GO:1905954	positive regulation of lipid localization	-4.28082	-1.66475	948,1392,2587,9536,51083	CD36,CRH,GALR1,PTGES,GAL	5/112
5_Member	GO Biological Processes	GO:2000831	regulation of steroid hormone secretion	-4.18773	-1.61829	1392,2587,51083	CRH,GALR1,GAL	3/22
5_Member	GO Biological Processes	GO:1903532	positive regulation of secretion by cell	-4.08181	-1.5592	846,1392,2587,4986,9536,51083,341359	CASR,CRH,GALR1,OPRK1,PTGES,GAL,SYT10	7/289
5_Member	GO Molecular Functions	GO:0005179	hormone activity	-4.07067	-1.55397	1392,4922,7276,10911,51083	CRH,NTS,TTR,UTS2,GAL	5/124
5_Member	GO Molecular Functions	GO:0048018	receptor ligand activity	-4.06321	-1.55234	1392,3084,4922,5173,7276,10911,51083,64388,80326	CRH,NRG1,NTS,PDYN,TTR,UTS2,GAL,GREM2,WNT10A	9/506
5_Member	GO Molecular Functions	GO:0030546	signaling receptor activator activity	-4.00526	-1.51696	1392,3084,4922,5173,7276,10911,51083,64388,80326	CRH,NRG1,NTS,PDYN,TTR,UTS2,GAL,GREM2,WNT10A	9/515
5_Member	GO Biological Processes	GO:0051047	positive regulation of secretion	-3.83322	-1.37157	846,1392,2587,4986,9536,51083,341359	CASR,CRH,GALR1,OPRK1,PTGES,GAL,SYT10	7/317
5_Member	GO Molecular Functions	GO:0005184	neuropeptide hormone activity	-3.77575	-1.33921	1392,4922,51083	CRH,NTS,GAL	3/30
5_Member	GO Molecular Functions	GO:0160041	neuropeptide activity	-3.77575	-1.33921	1392,4922,51083	CRH,NTS,GAL	3/30
5_Member	GO Biological Processes	GO:0032368	regulation of lipid transport	-3.62995	-1.23966	208,1392,2587,9536,51083	AKT2,CRH,GALR1,PTGES,GAL	5/154
5_Member	GO Biological Processes	GO:0046883	regulation of hormone secretion	-3.57396	-1.20507	846,1392,2587,2693,4986,51083	CASR,CRH,GALR1,GHSR,OPRK1,GAL	6/247
5_Member	GO Biological Processes	GO:0032370	positive regulation of lipid transport	-3.56461	-1.19987	1392,2587,9536,51083	CRH,GALR1,PTGES,GAL	4/87
5_Member	GO Biological Processes	GO:0051046	regulation of secretion	-3.34893	-1.0237	846,1392,2587,2693,3084,4986,9536,51083,341359	CASR,CRH,GALR1,GHSR,NRG1,OPRK1,PTGES,GAL,SYT10	9/632
5_Member	GO Biological Processes	GO:0010817	regulation of hormone levels	-3.17655	-0.890994	846,1392,2587,2693,4986,6571,51083,56603	CASR,CRH,GALR1,GHSR,OPRK1,SLC18A2,GAL,CYP26B1	8/533
5_Member	GO Biological Processes	GO:1903530	regulation of secretion by cell	-2.97429	-0.746721	846,1392,2587,2693,4986,9536,51083,341359	CASR,CRH,GALR1,GHSR,OPRK1,PTGES,GAL,SYT10	8/573
5_Member	GO Biological Processes	GO:0044057	regulation of system process	-2.89831	-0.694228	846,1392,2587,2693,4986,7139,51083,255743	CASR,CRH,GALR1,GHSR,OPRK1,TNNT2,GAL,NPNT	8/589
5_Member	GO Biological Processes	GO:0046887	positive regulation of hormone secretion	-2.81227	-0.635856	846,1392,2587,51083	CASR,CRH,GALR1,GAL	4/138
6_Summary	GO Biological Processes	GO:0048729	tissue morphogenesis	-6.03908	-2.97537	846,3084,7139,9353,9423,56963,64399,79977,80000,80326,255743,340419,7026,10016,27286,401498,79633,5176,56603	CASR,NRG1,TNNT2,SLIT2,NTN1,RGMA,HHIP,GRHL2,GREB1L,WNT10A,NPNT,RSPO2,NR2F2,PDCD6,SRPX2,TMEM215,FAT4,SERPINF1,CYP26B1	19/-
6_Member	GO Biological Processes	GO:0048729	tissue morphogenesis	-6.03908	-2.97537	846,3084,7139,9353,9423,56963,64399,79977,80000,80326,255743,340419	CASR,NRG1,TNNT2,SLIT2,NTN1,RGMA,HHIP,GRHL2,GREB1L,WNT10A,NPNT,RSPO2	12/567
6_Member	GO Biological Processes	GO:0035239	tube morphogenesis	-6.01866	-2.97515	846,7026,9353,9423,10016,27286,56963,64399,79977,80000,255743,340419,401498	CASR,NR2F2,SLIT2,NTN1,PDCD6,SRPX2,RGMA,HHIP,GRHL2,GREB1L,NPNT,RSPO2,TMEM215	13/679
6_Member	GO Biological Processes	GO:0060562	epithelial tube morphogenesis	-5.72436	-2.71864	846,9353,9423,56963,64399,79977,80000,255743,340419	CASR,SLIT2,NTN1,RGMA,HHIP,GRHL2,GREB1L,NPNT,RSPO2	9/312
6_Member	GO Biological Processes	GO:0061138	morphogenesis of a branching epithelium	-5.65301	-2.66502	846,9353,64399,79977,80000,255743,340419	CASR,SLIT2,HHIP,GRHL2,GREB1L,NPNT,RSPO2	7/165
6_Member	GO Biological Processes	GO:0001763	morphogenesis of a branching structure	-5.48356	-2.51261	846,9353,64399,79977,80000,255743,340419	CASR,SLIT2,HHIP,GRHL2,GREB1L,NPNT,RSPO2	7/175
6_Member	GO Biological Processes	GO:0002009	morphogenesis of an epithelium	-5.27688	-2.39611	846,9353,9423,56963,64399,79977,80000,80326,255743,340419	CASR,SLIT2,NTN1,RGMA,HHIP,GRHL2,GREB1L,WNT10A,NPNT,RSPO2	10/452
6_Member	GO Biological Processes	GO:0048754	branching morphogenesis of an epithelial tube	-4.99403	-2.19917	846,9353,64399,80000,255743,340419	CASR,SLIT2,HHIP,GREB1L,NPNT,RSPO2	6/137
6_Member	WikiPathways	WP5053	Development of ureteric collection system	-2.88376	-0.690468	9353,79633,80000	SLIT2,FAT4,GREB1L	3/60
6_Member	GO Biological Processes	GO:0001657	ureteric bud development	-2.45143	-0.368694	9353,80000,255743	SLIT2,GREB1L,NPNT	3/85
6_Member	GO Biological Processes	GO:0072163	mesonephric epithelium development	-2.43712	-0.36295	9353,80000,255743	SLIT2,GREB1L,NPNT	3/86
6_Member	GO Biological Processes	GO:0072164	mesonephric tubule development	-2.43712	-0.36295	9353,80000,255743	SLIT2,GREB1L,NPNT	3/86
6_Member	GO Biological Processes	GO:0001823	mesonephros development	-2.38168	-0.323229	9353,80000,255743	SLIT2,GREB1L,NPNT	3/90
6_Member	GO Biological Processes	GO:0001822	kidney development	-2.35806	-0.31406	5176,9353,56603,80000,255743	SERPINF1,SLIT2,CYP26B1,GREB1L,NPNT	5/298
6_Member	GO Biological Processes	GO:0072001	renal system development	-2.29803	-0.279459	5176,9353,56603,80000,255743	SERPINF1,SLIT2,CYP26B1,GREB1L,NPNT	5/308
7_Summary	GO Biological Processes	GO:0010975	regulation of neuron projection development	-5.27688	-2.39611	5176,5793,9353,9423,10154,10611,23105,56963,220202,374946,7162,27286,404037,623,2786,3084,5173,2693,83481,79977	SERPINF1,PTPRG,SLIT2,NTN1,PLXNC1,PDLIM5,FSTL4,RGMA,ATOH7,DRAXIN,TPBG,SRPX2,HAPLN4,BDKRB1,GNG4,NRG1,PDYN,GHSR,EPPK1,GRHL2	20/-
7_Member	GO Biological Processes	GO:0010975	regulation of neuron projection development	-5.27688	-2.39611	5176,5793,9353,9423,10154,10611,23105,56963,220202,374946	SERPINF1,PTPRG,SLIT2,NTN1,PLXNC1,PDLIM5,FSTL4,RGMA,ATOH7,DRAXIN	10/452
7_Member	GO Biological Processes	GO:0010977	negative regulation of neuron projection development	-4.90517	-2.14249	5793,9353,9423,23105,56963,374946	PTPRG,SLIT2,NTN1,FSTL4,RGMA,DRAXIN	6/142
7_Member	GO Biological Processes	GO:0051960	regulation of nervous system development	-4.31514	-1.6774	5176,7162,9353,9423,10154,23105,27286,374946,404037	SERPINF1,TPBG,SLIT2,NTN1,PLXNC1,FSTL4,SRPX2,DRAXIN,HAPLN4	9/469
7_Member	GO Biological Processes	GO:0030308	negative regulation of cell growth	-4.18193	-1.61829	623,2786,9353,9423,23105,374946	BDKRB1,GNG4,SLIT2,NTN1,FSTL4,DRAXIN	6/191
7_Member	GO Biological Processes	GO:0031345	negative regulation of cell projection organization	-4.14453	-1.59111	5793,9353,9423,23105,56963,374946	PTPRG,SLIT2,NTN1,FSTL4,RGMA,DRAXIN	6/194
7_Member	GO Biological Processes	GO:0051962	positive regulation of nervous system development	-4.09119	-1.5626	5176,7162,9353,9423,10154,27286,404037	SERPINF1,TPBG,SLIT2,NTN1,PLXNC1,SRPX2,HAPLN4	7/288
7_Member	GO Biological Processes	GO:0120035	regulation of plasma membrane bounded cell projection organization	-3.9562	-1.47337	5176,5793,9353,9423,10154,10611,23105,56963,220202,374946	SERPINF1,PTPRG,SLIT2,NTN1,PLXNC1,PDLIM5,FSTL4,RGMA,ATOH7,DRAXIN	10/647
7_Member	GO Biological Processes	GO:0031344	regulation of cell projection organization	-3.87521	-1.40836	5176,5793,9353,9423,10154,10611,23105,56963,220202,374946	SERPINF1,PTPRG,SLIT2,NTN1,PLXNC1,PDLIM5,FSTL4,RGMA,ATOH7,DRAXIN	10/662
7_Member	GO Biological Processes	GO:0050770	regulation of axonogenesis	-3.61694	-1.23101	9353,9423,10154,23105,374946	SLIT2,NTN1,PLXNC1,FSTL4,DRAXIN	5/155
7_Member	GO Biological Processes	GO:0045926	negative regulation of growth	-3.52744	-1.17894	623,2786,9353,9423,23105,374946	BDKRB1,GNG4,SLIT2,NTN1,FSTL4,DRAXIN	6/252
7_Member	GO Biological Processes	GO:0050767	regulation of neurogenesis	-3.2898	-0.986654	5176,9353,9423,10154,23105,374946,404037	SERPINF1,SLIT2,NTN1,PLXNC1,FSTL4,DRAXIN,HAPLN4	7/390
7_Member	GO Biological Processes	GO:0050919	negative chemotaxis	-3.22103	-0.932012	3084,9353,9423	NRG1,SLIT2,NTN1	3/46
7_Member	Reactome Gene Sets	R-HSA-373752	Netrin-1 signaling	-3.11455	-0.855722	9353,9423,56963	SLIT2,NTN1,RGMA	3/50
7_Member	WikiPathways	WP2431	Spinal cord injury	-3.02324	-0.783441	5173,9353,9423,56963	PDYN,SLIT2,NTN1,RGMA	4/121
7_Member	GO Biological Processes	GO:0050771	negative regulation of axonogenesis	-2.76428	-0.603666	9423,23105,374946	NTN1,FSTL4,DRAXIN	3/66
7_Member	GO Biological Processes	GO:0050769	positive regulation of neurogenesis	-2.7612	-0.60316	5176,9353,9423,10154,404037	SERPINF1,SLIT2,NTN1,PLXNC1,HAPLN4	5/240
7_Member	GO Biological Processes	GO:0040008	regulation of growth	-2.75836	-0.602877	623,2693,2786,9353,9423,23105,83481,374946	BDKRB1,GHSR,GNG4,SLIT2,NTN1,FSTL4,EPPK1,DRAXIN	8/620
7_Member	GO Biological Processes	GO:0050772	positive regulation of axonogenesis	-2.58902	-0.467342	9353,9423,10154	SLIT2,NTN1,PLXNC1	3/76
7_Member	GO Biological Processes	GO:0001558	regulation of cell growth	-2.39946	-0.331597	623,2786,9353,9423,23105,374946	BDKRB1,GNG4,SLIT2,NTN1,FSTL4,DRAXIN	6/419
7_Member	KEGG Pathway	hsa04360	Axon guidance	-2.37874	-0.323229	9353,9423,10154,56963	SLIT2,NTN1,PLXNC1,RGMA	4/182
7_Member	GO Biological Processes	GO:0061387	regulation of extent of cell growth	-2.19547	-0.207485	9423,23105,374946	NTN1,FSTL4,DRAXIN	3/105
7_Member	GO Biological Processes	GO:0048638	regulation of developmental growth	-2.18476	-0.201672	2693,9423,23105,83481,374946	GHSR,NTN1,FSTL4,EPPK1,DRAXIN	5/328
7_Member	GO Biological Processes	GO:0007411	axon guidance	-2.08469	-0.13492	9353,9423,10154,374946	SLIT2,NTN1,PLXNC1,DRAXIN	4/221
7_Member	GO Biological Processes	GO:0097485	neuron projection guidance	-2.08469	-0.13492	9353,9423,10154,374946	SLIT2,NTN1,PLXNC1,DRAXIN	4/221
7_Member	GO Biological Processes	GO:0048640	negative regulation of developmental growth	-2.07672	-0.131704	9423,23105,374946	NTN1,FSTL4,DRAXIN	3/116
7_Member	GO Biological Processes	GO:0000904	cell morphogenesis involved in differentiation	-2.06463	-0.122748	7162,9353,9423,10154,79977,374946	TPBG,SLIT2,NTN1,PLXNC1,GRHL2,DRAXIN	6/493
7_Member	GO Biological Processes	GO:0031346	positive regulation of cell projection organization	-2.04459	-0.108911	5176,9353,9423,10154,220202	SERPINF1,SLIT2,NTN1,PLXNC1,ATOH7	5/355
8_Summary	Canonical Pathways	M5884	NABA CORE MATRISOME	-5.16908	-2.31571	1290,9353,9423,26577,27286,255743,340419,404037,56925,64388,60495	COL5A2,SLIT2,NTN1,PCOLCE2,SRPX2,NPNT,RSPO2,HAPLN4,LXN,GREM2,HPSE2	11/-
8_Member	Canonical Pathways	M5884	NABA CORE MATRISOME	-5.16908	-2.31571	1290,9353,9423,26577,27286,255743,340419,404037	COL5A2,SLIT2,NTN1,PCOLCE2,SRPX2,NPNT,RSPO2,HAPLN4	8/275
8_Member	Canonical Pathways	M3008	NABA ECM GLYCOPROTEINS	-4.11995	-1.5811	9353,9423,26577,27286,255743,340419	SLIT2,NTN1,PCOLCE2,SRPX2,NPNT,RSPO2	6/196
8_Member	GO Molecular Functions	GO:0005539	glycosaminoglycan binding	-3.69014	-1.29099	9353,26577,56925,64388,340419,404037	SLIT2,PCOLCE2,LXN,GREM2,RSPO2,HAPLN4	6/235
8_Member	GO Molecular Functions	GO:0008201	heparin binding	-3.42052	-1.08381	9353,26577,56925,64388,340419	SLIT2,PCOLCE2,LXN,GREM2,RSPO2	5/171
8_Member	GO Molecular Functions	GO:1901681	sulfur compound binding	-3.34301	-1.02154	9353,26577,56925,60495,64388,340419	SLIT2,PCOLCE2,LXN,HPSE2,GREM2,RSPO2	6/273
8_Member	GO Molecular Functions	GO:0005201	extracellular matrix structural constituent	-2.52116	-0.416723	1290,27286,255743,404037	COL5A2,SRPX2,NPNT,HAPLN4	4/166
9_Summary	GO Biological Processes	GO:1902074	response to salt	-5.02255	-2.21641	360,846,948,2693,4986,7139,10016,116372,341359,5176	AQP3,CASR,CD36,GHSR,OPRK1,TNNT2,PDCD6,LYPD1,SYT10,SERPINF1	10/-
9_Member	GO Biological Processes	GO:1902074	response to salt	-5.02255	-2.21641	360,846,948,2693,4986,7139,10016,116372,341359	AQP3,CASR,CD36,GHSR,OPRK1,TNNT2,PDCD6,LYPD1,SYT10	9/381
9_Member	GO Biological Processes	GO:0051592	response to calcium ion	-3.69647	-1.29099	360,846,7139,10016,341359	AQP3,CASR,TNNT2,PDCD6,SYT10	5/149
9_Member	GO Biological Processes	GO:0010038	response to metal ion	-2.67081	-0.532858	360,846,5176,7139,10016,341359	AQP3,CASR,SERPINF1,TNNT2,PDCD6,SYT10	6/369
10_Summary	GO Biological Processes	GO:0003013	circulatory system process	-4.94116	-2.1667	623,846,948,3816,4922,7026,7139,9353,10911,83988	BDKRB1,CASR,CD36,KLK1,NTS,NR2F2,TNNT2,SLIT2,UTS2,NCALD	10/-
10_Member	GO Biological Processes	GO:0003013	circulatory system process	-4.94116	-2.1667	623,846,948,3816,4922,7026,7139,9353,10911,83988	BDKRB1,CASR,CD36,KLK1,NTS,NR2F2,TNNT2,SLIT2,UTS2,NCALD	10/494
10_Member	GO Biological Processes	GO:0008015	blood circulation	-4.83755	-2.08509	623,846,3816,4922,7026,7139,9353,10911,83988	BDKRB1,CASR,KLK1,NTS,NR2F2,TNNT2,SLIT2,UTS2,NCALD	9/402
10_Member	GO Biological Processes	GO:0008217	regulation of blood pressure	-3.25418	-0.954611	623,3816,7026,10911,83988	BDKRB1,KLK1,NR2F2,UTS2,NCALD	5/186
10_Member	GO Biological Processes	GO:0003073	regulation of systemic arterial blood pressure	-2.32886	-0.304661	3816,7026,83988	KLK1,NR2F2,NCALD	3/94
11_Summary	GO Biological Processes	GO:0050807	regulation of synapse organization	-4.63791	-1.92408	2693,7162,9423,10154,10611,10882,27286,395,3957,54510,56128,79633,255743	GHSR,TPBG,NTN1,PLXNC1,PDLIM5,C1QL1,SRPX2,ARHGAP6,LGALS2,PCDH18,PCDHB8,FAT4,NPNT	13/-
11_Member	GO Biological Processes	GO:0050807	regulation of synapse organization	-4.63791	-1.92408	2693,7162,9423,10154,10611,10882,27286	GHSR,TPBG,NTN1,PLXNC1,PDLIM5,C1QL1,SRPX2	7/236
11_Member	GO Biological Processes	GO:0050803	regulation of synapse structure or activity	-4.57968	-1.89272	2693,7162,9423,10154,10611,10882,27286	GHSR,TPBG,NTN1,PLXNC1,PDLIM5,C1QL1,SRPX2	7/241
11_Member	GO Biological Processes	GO:0051963	regulation of synapse assembly	-4.24414	-1.63636	2693,7162,9423,10611,27286	GHSR,TPBG,NTN1,PDLIM5,SRPX2	5/114
11_Member	GO Biological Processes	GO:1901888	regulation of cell junction assembly	-3.91063	-1.43852	395,2693,7162,9423,10611,27286	ARHGAP6,GHSR,TPBG,NTN1,PDLIM5,SRPX2	6/214
11_Member	GO Biological Processes	GO:0098609	cell-cell adhesion	-3.16073	-0.886825	3957,9423,10611,27286,54510,56128,79633,255743	LGALS2,NTN1,PDLIM5,SRPX2,PCDH18,PCDHB8,FAT4,NPNT	8/536
12_Summary	GO Biological Processes	GO:0009713	catechol-containing compound biosynthetic process	-4.38554	-1.732	1644,3067,3642,26031,635	DDC,HDC,INSM1,OSBPL3,BHMT	5/-
12_Member	GO Biological Processes	GO:0009713	catechol-containing compound biosynthetic process	-4.38554	-1.732	1644,3067,3642	DDC,HDC,INSM1	3/19
12_Member	GO Biological Processes	GO:0042423	catecholamine biosynthetic process	-4.38554	-1.732	1644,3067,3642	DDC,HDC,INSM1	3/19
12_Member	GO Biological Processes	GO:0042401	biogenic amine biosynthetic process	-3.57401	-1.20507	1644,3067,3642	DDC,HDC,INSM1	3/35
12_Member	GO Biological Processes	GO:0046189	phenol-containing compound biosynthetic process	-3.57401	-1.20507	1644,3067,3642	DDC,HDC,INSM1	3/35
12_Member	GO Biological Processes	GO:0009309	amine biosynthetic process	-3.53734	-1.18118	1644,3067,3642	DDC,HDC,INSM1	3/36
12_Member	GO Biological Processes	GO:0006584	catecholamine metabolic process	-3.30758	-0.997195	1644,3067,3642	DDC,HDC,INSM1	3/43
12_Member	GO Biological Processes	GO:0009712	catechol-containing compound metabolic process	-3.30758	-0.997195	1644,3067,3642	DDC,HDC,INSM1	3/43
12_Member	GO Biological Processes	GO:1901617	organic hydroxy compound biosynthetic process	-2.46599	-0.381015	1644,3067,3642,26031	DDC,HDC,INSM1,OSBPL3	4/172
12_Member	GO Biological Processes	GO:0006576	biogenic amine metabolic process	-2.46591	-0.381015	1644,3067,3642	DDC,HDC,INSM1	3/84
12_Member	GO Biological Processes	GO:0018958	phenol-containing compound metabolic process	-2.423	-0.350941	1644,3067,3642	DDC,HDC,INSM1	3/87
12_Member	WikiPathways	WP3925	Amino acid metabolism	-2.36823	-0.318767	635,1644,3067	BHMT,DDC,HDC	3/91
12_Member	GO Biological Processes	GO:0009308	amine metabolic process	-2.34183	-0.310011	1644,3067,3642	DDC,HDC,INSM1	3/93
13_Summary	GO Biological Processes	GO:0043586	tongue development	-4.31608	-1.6774	54796,56603,80326,1290,5176,5816,9423,79977,220202	BNC2,CYP26B1,WNT10A,COL5A2,SERPINF1,PVALB,NTN1,GRHL2,ATOH7	9/-
13_Member	GO Biological Processes	GO:0043586	tongue development	-4.31608	-1.6774	54796,56603,80326	BNC2,CYP26B1,WNT10A	3/20
13_Member	GO Biological Processes	GO:0007423	sensory organ development	-3.6536	-1.25889	1290,5176,5816,9423,54796,56603,79977,80326,220202	COL5A2,SERPINF1,PVALB,NTN1,BNC2,CYP26B1,GRHL2,WNT10A,ATOH7	9/574
14_Summary	GO Biological Processes	GO:0010633	negative regulation of epithelial cell migration	-4.20815	-1.61829	5176,5793,7026,9353,83481,10016,27286,4986,5806,1644,220202,80000,2693,623,3642,260434	SERPINF1,PTPRG,NR2F2,SLIT2,EPPK1,PDCD6,SRPX2,OPRK1,PTX3,DDC,ATOH7,GREB1L,GHSR,BDKRB1,INSM1,PYDC1	16/-
14_Member	GO Biological Processes	GO:0010633	negative regulation of epithelial cell migration	-4.20815	-1.61829	5176,5793,7026,9353,83481	SERPINF1,PTPRG,NR2F2,SLIT2,EPPK1	5/116
14_Member	GO Biological Processes	GO:0010632	regulation of epithelial cell migration	-4.02627	-1.52307	5176,5793,7026,9353,10016,27286,83481	SERPINF1,PTPRG,NR2F2,SLIT2,PDCD6,SRPX2,EPPK1	7/295
14_Member	GO Biological Processes	GO:0042698	ovulation cycle	-3.81312	-1.36169	4986,5176,5806,9353	OPRK1,SERPINF1,PTX3,SLIT2	4/75
14_Member	GO Biological Processes	GO:0048511	rhythmic process	-3.29331	-0.986654	1644,4986,5176,5806,9353,220202	DDC,OPRK1,SERPINF1,PTX3,SLIT2,ATOH7	6/279
14_Member	GO Biological Processes	GO:0010594	regulation of endothelial cell migration	-2.82571	-0.646608	5176,7026,9353,10016,27286	SERPINF1,NR2F2,SLIT2,PDCD6,SRPX2	5/232
14_Member	GO Biological Processes	GO:0048608	reproductive structure development	-2.37036	-0.318767	5176,5806,7026,9353,80000	SERPINF1,PTX3,NR2F2,SLIT2,GREB1L	5/296
14_Member	GO Biological Processes	GO:0040013	negative regulation of locomotion	-2.35977	-0.31406	2693,5176,5793,7026,9353,83481	GHSR,SERPINF1,PTPRG,NR2F2,SLIT2,EPPK1	6/427
14_Member	GO Biological Processes	GO:0061458	reproductive system development	-2.34587	-0.310011	5176,5806,7026,9353,80000	SERPINF1,PTX3,NR2F2,SLIT2,GREB1L	5/300
14_Member	GO Biological Processes	GO:0008585	female gonad development	-2.29084	-0.27413	5806,7026,9353	PTX3,NR2F2,SLIT2	3/97
14_Member	GO Biological Processes	GO:0010596	negative regulation of endothelial cell migration	-2.26621	-0.253192	5176,7026,9353	SERPINF1,NR2F2,SLIT2	3/99
14_Member	GO Biological Processes	GO:0046545	development of primary female sexual characteristics	-2.24212	-0.234586	5806,7026,9353	PTX3,NR2F2,SLIT2	3/101
14_Member	GO Biological Processes	GO:0001933	negative regulation of protein phosphorylation	-2.15241	-0.181468	623,3642,7026,9353,260434	BDKRB1,INSM1,NR2F2,SLIT2,PYDC1	5/334
14_Member	GO Biological Processes	GO:0046660	female sex differentiation	-2.07672	-0.131704	5806,7026,9353	PTX3,NR2F2,SLIT2	3/116
14_Member	GO Biological Processes	GO:0042326	negative regulation of phosphorylation	-2.00078	-0.0772487	623,3642,7026,9353,260434	BDKRB1,INSM1,NR2F2,SLIT2,PYDC1	5/364
15_Summary	GO Biological Processes	GO:0040017	positive regulation of locomotion	-4.17815	-1.61829	208,623,846,3642,4986,7162,9353,9423,10016,27286	AKT2,BDKRB1,CASR,INSM1,OPRK1,TPBG,SLIT2,NTN1,PDCD6,SRPX2	10/-
15_Member	GO Biological Processes	GO:0040017	positive regulation of locomotion	-4.17815	-1.61829	208,623,846,3642,4986,7162,9353,9423,10016,27286	AKT2,BDKRB1,CASR,INSM1,OPRK1,TPBG,SLIT2,NTN1,PDCD6,SRPX2	10/608
16_Summary	GO Biological Processes	GO:0003231	cardiac ventricle development	-4.02159	-1.52307	3084,7139,9353,79977,80000,1134,7026,10611,255743	NRG1,TNNT2,SLIT2,GRHL2,GREB1L,CHRNA1,NR2F2,PDLIM5,NPNT	9/-
16_Member	GO Biological Processes	GO:0003231	cardiac ventricle development	-4.02159	-1.52307	3084,7139,9353,79977,80000	NRG1,TNNT2,SLIT2,GRHL2,GREB1L	5/127
16_Member	GO Biological Processes	GO:0003205	cardiac chamber development	-3.46764	-1.12704	3084,7139,9353,79977,80000	NRG1,TNNT2,SLIT2,GRHL2,GREB1L	5/167
16_Member	GO Biological Processes	GO:0003206	cardiac chamber morphogenesis	-2.94523	-0.720671	3084,7139,9353,79977	NRG1,TNNT2,SLIT2,GRHL2	4/127
16_Member	GO Biological Processes	GO:0003208	cardiac ventricle morphogenesis	-2.67332	-0.532908	3084,7139,79977	NRG1,TNNT2,GRHL2	3/71
16_Member	GO Biological Processes	GO:0060537	muscle tissue development	-2.14178	-0.175811	1134,3084,7026,7139,10611	CHRNA1,NRG1,NR2F2,TNNT2,PDLIM5	5/336
16_Member	GO Biological Processes	GO:0061061	muscle structure development	-2.01247	-0.0874424	1134,3084,7026,7139,10611,255743	CHRNA1,NRG1,NR2F2,TNNT2,PDLIM5,NPNT	6/506
17_Summary	GO Biological Processes	GO:0051932	synaptic transmission, GABAergic	-4.01691	-1.52307	2554,7162,404037,395,1134,10882,79977,440279	GABRA1,TPBG,HAPLN4,ARHGAP6,CHRNA1,C1QL1,GRHL2,UNC13C	8/-
17_Member	GO Biological Processes	GO:0051932	synaptic transmission, GABAergic	-4.01691	-1.52307	2554,7162,404037	GABRA1,TPBG,HAPLN4	3/25
17_Member	GO Biological Processes	GO:0034330	cell junction organization	-2.56354	-0.444785	395,1134,2554,10882,79977,404037,440279	ARHGAP6,CHRNA1,GABRA1,C1QL1,GRHL2,HAPLN4,UNC13C	7/522
17_Member	GO Biological Processes	GO:0050808	synapse organization	-2.1957	-0.207485	1134,2554,10882,404037,440279	CHRNA1,GABRA1,C1QL1,HAPLN4,UNC13C	5/326
18_Summary	GO Biological Processes	GO:0019233	sensory perception of pain	-3.79083	-1.34442	623,4986,9536,56925,2693,10888,51083,208,1392,3755,27133,56660,644139,846	BDKRB1,OPRK1,PTGES,LXN,GHSR,GPR83,GAL,AKT2,CRH,KCNG1,KCNH5,KCNK12,PIRT,CASR	14/-
18_Member	GO Biological Processes	GO:0019233	sensory perception of pain	-3.79083	-1.34442	623,4986,9536,56925	BDKRB1,OPRK1,PTGES,LXN	4/76
18_Member	GO Biological Processes	GO:0007631	feeding behavior	-3.4718	-1.12727	2693,4986,10888,51083	GHSR,OPRK1,GPR83,GAL	4/92
18_Member	GO Biological Processes	GO:0034762	regulation of transmembrane transport	-3.3989	-1.06605	208,623,1392,3755,4986,27133,51083,56660,644139	AKT2,BDKRB1,CRH,KCNG1,OPRK1,KCNH5,GAL,KCNK12,PIRT	9/622
18_Member	GO Biological Processes	GO:0043269	regulation of monoatomic ion transport	-2.83396	-0.649432	623,846,3755,4986,27133,51083,56660,644139	BDKRB1,CASR,KCNG1,OPRK1,KCNH5,GAL,KCNK12,PIRT	8/603
18_Member	GO Biological Processes	GO:0043270	positive regulation of monoatomic ion transport	-2.82571	-0.646608	623,846,4986,51083,644139	BDKRB1,CASR,OPRK1,GAL,PIRT	5/232
18_Member	GO Biological Processes	GO:0034764	positive regulation of transmembrane transport	-2.80122	-0.629686	208,623,4986,51083,644139	AKT2,BDKRB1,OPRK1,GAL,PIRT	5/235
18_Member	GO Biological Processes	GO:0034765	regulation of monoatomic ion transmembrane transport	-2.75207	-0.599139	623,3755,4986,27133,51083,56660,644139	BDKRB1,KCNG1,OPRK1,KCNH5,GAL,KCNK12,PIRT	7/483
18_Member	GO Biological Processes	GO:1904064	positive regulation of cation transmembrane transport	-2.65918	-0.5261	623,4986,51083,644139	BDKRB1,OPRK1,GAL,PIRT	4/152
18_Member	GO Biological Processes	GO:0034767	positive regulation of monoatomic ion transmembrane transport	-2.43922	-0.36295	623,4986,51083,644139	BDKRB1,OPRK1,GAL,PIRT	4/175
18_Member	GO Biological Processes	GO:1901379	regulation of potassium ion transmembrane transport	-2.32886	-0.304661	3755,4986,51083	KCNG1,OPRK1,GAL	3/94
18_Member	GO Biological Processes	GO:0043266	regulation of potassium ion transport	-2.16176	-0.187454	3755,4986,51083	KCNG1,OPRK1,GAL	3/108
18_Member	GO Biological Processes	GO:0032868	response to insulin	-2.11195	-0.154155	208,2693,4986,51083	AKT2,GHSR,OPRK1,GAL	4/217
18_Member	GO Biological Processes	GO:1904062	regulation of monoatomic cation transmembrane transport	-2.07457	-0.131124	623,3755,4986,51083,644139	BDKRB1,KCNG1,OPRK1,GAL,PIRT	5/349
19_Summary	GO Biological Processes	GO:0006954	inflammatory response	-3.7329	-1.31076	623,948,1392,5737,5806,6571,51083,56603,56925,2587,83988,2693,4986,260434	BDKRB1,CD36,CRH,PTGFR,PTX3,SLC18A2,GAL,CYP26B1,LXN,GALR1,NCALD,GHSR,OPRK1,PYDC1	14/-
19_Member	GO Biological Processes	GO:0006954	inflammatory response	-3.7329	-1.31076	623,948,1392,5737,5806,6571,51083,56603,56925	BDKRB1,CD36,CRH,PTGFR,PTX3,SLC18A2,GAL,CYP26B1,LXN	9/560
19_Member	GO Biological Processes	GO:0007204	positive regulation of cytosolic calcium ion concentration	-2.32899	-0.304661	623,948,2587,5737	BDKRB1,CD36,GALR1,PTGFR	4/188
19_Member	GO Biological Processes	GO:0019932	second-messenger-mediated signaling	-2.18277	-0.201672	948,5737,51083,83988	CD36,PTGFR,GAL,NCALD	4/207
19_Member	GO Biological Processes	GO:0032496	response to lipopolysaccharide	-2.14178	-0.175811	623,948,2693,4986,5737	BDKRB1,CD36,GHSR,OPRK1,PTGFR	5/336
19_Member	GO Biological Processes	GO:0032651	regulation of interleukin-1 beta production	-2.1184	-0.158981	948,2693,260434	CD36,GHSR,PYDC1	3/112
19_Member	GO Biological Processes	GO:0002237	response to molecule of bacterial origin	-2.03473	-0.105173	623,948,2693,4986,5737	BDKRB1,CD36,GHSR,OPRK1,PTGFR	5/357
20_Summary	Reactome Gene Sets	R-HSA-451326	Activation of kainate receptors upon glutamate binding	-3.69105	-1.29099	2786,2897,83988,3755,27133	GNG4,GRIK1,NCALD,KCNG1,KCNH5	5/-
20_Member	Reactome Gene Sets	R-HSA-451326	Activation of kainate receptors upon glutamate binding	-3.69105	-1.29099	2786,2897,83988	GNG4,GRIK1,NCALD	3/32
20_Member	Reactome Gene Sets	R-HSA-1296071	Potassium Channels	-2.21854	-0.220006	2786,3755,27133	GNG4,KCNG1,KCNH5	3/103
