# Supplementary material for: Deciphering developmental gradients in human hippocampus
Source: Research Square preprint supplement (doi:10.21203/rs.3.rs-8009443/v1), 2025-12-10
Supplement: Supplementary file 2 [file 2c4c9469821fad578da77b13.docx]

**Deciphering developmental gradients in human hippocampus**

Debin Zeng1,2, Qiongling Li2,3,4, Deyu Li1,5, Yirong He2, Xiaoxi Dong2, Zekun Yang2, Yiyu Zhang2, Shaoxian Li2, Shenghan Bi2, Ting Xu6, Xuhong Liao7, Tengda Zhao2,3,4, Xiaodan Chen2,3,4, Yunman Xia2,3,4, Tianyuan Lei2,3,4, Lianglong Sun2,3,4, Weiwei Men8,9, Yanpei Wang2, Daoyang Wang2, Mingming Hu2, Zhiying Pan2, Shuping Tan10, Jia-Hong Gao8,9,11, Shaozheng Qin2,3,4,12, Sha Tao2, Qi Dong2, Yong He2,3,4,12*, Xi-Nian Zuo2,4,13,14*†, Shuyu Li2*†

*1Beijing Advanced Innovation Center for Biomedical Engineering, School of Biological Science & Medical Engineering, Beihang University, Beijing 100083, China*

*2State Key Laboratory of Cognitive Neuroscience and Learning, Beijing Normal University, Beijing,* *100875, China*

*3Beijing Key Laboratory of Brain Imaging and Connectomics, Beijing Normal University, Beijing, 100875, China*

*4IDG/McGovern Institute for Brain Research, Beijing Normal University, Beijing, 100875, China*

*5State Key Laboratory of Virtual Reaility technology and Systems, Beihang University, Beijing 100083, China*

*6Child Mind Institute, New York, NY, USA*

*7School of Systems Science, Beijing Normal University, Beijing 100875, China*

*8Center for MRI Research, Academy for Advanced Interdisciplinary Studies, Peking University, Beijing 100871, China,*

*9Beijing City Key Laboratory for Medical Physics and Engineering, Institute of Heavy Ion Physics, School of Physics, Peking University, Beijing 100871, China*

*10Beijing Huilongguan Hospital, Peking University Huilongguan Clinical Medical School, Beijing 100096, China*

*11IDG/McGovern Institute for Brain Research, Peking University, Beijing 100871, China*

*12Chinese Institute for Brain Research, Beijing 102206, China*

*13National Basic Science Data Center, Beijing, 100109, China*

*14Developmental Population Neuroscience Research Center, Beijing Normal University, Beijing, 100875, China*

†These authors contributed equally

*Corresponding authorship.

Shuyu Li (shuyuli@bnu.edu.cn)

Yong He (yong.he@bnu.edu.cn)

Xi-Nian Zuo (xinian.zuo@bnu.edu.cn)

Supplementary Figures


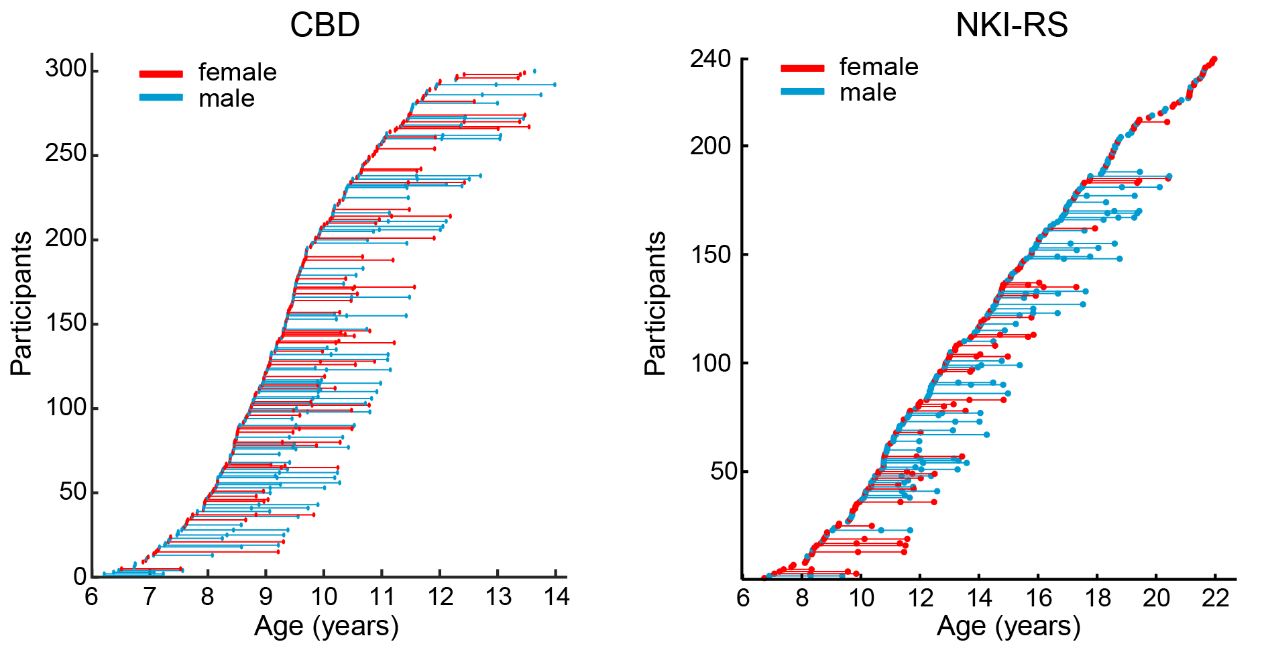


**Supplementary Fig. 1 Demographic information of the CBD and NKI-RS samples: age information for each scan of all participants.**

**
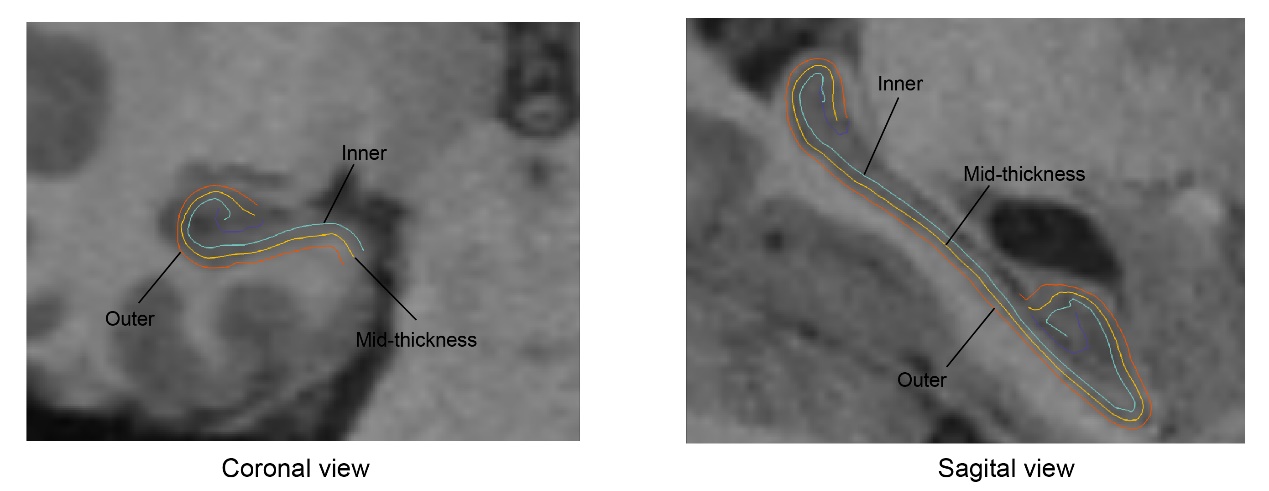
**

**Supplementary Fig. 2 Sagittal and coronal view of the inner, outer, and mid-thickness surface (I-O axis).**


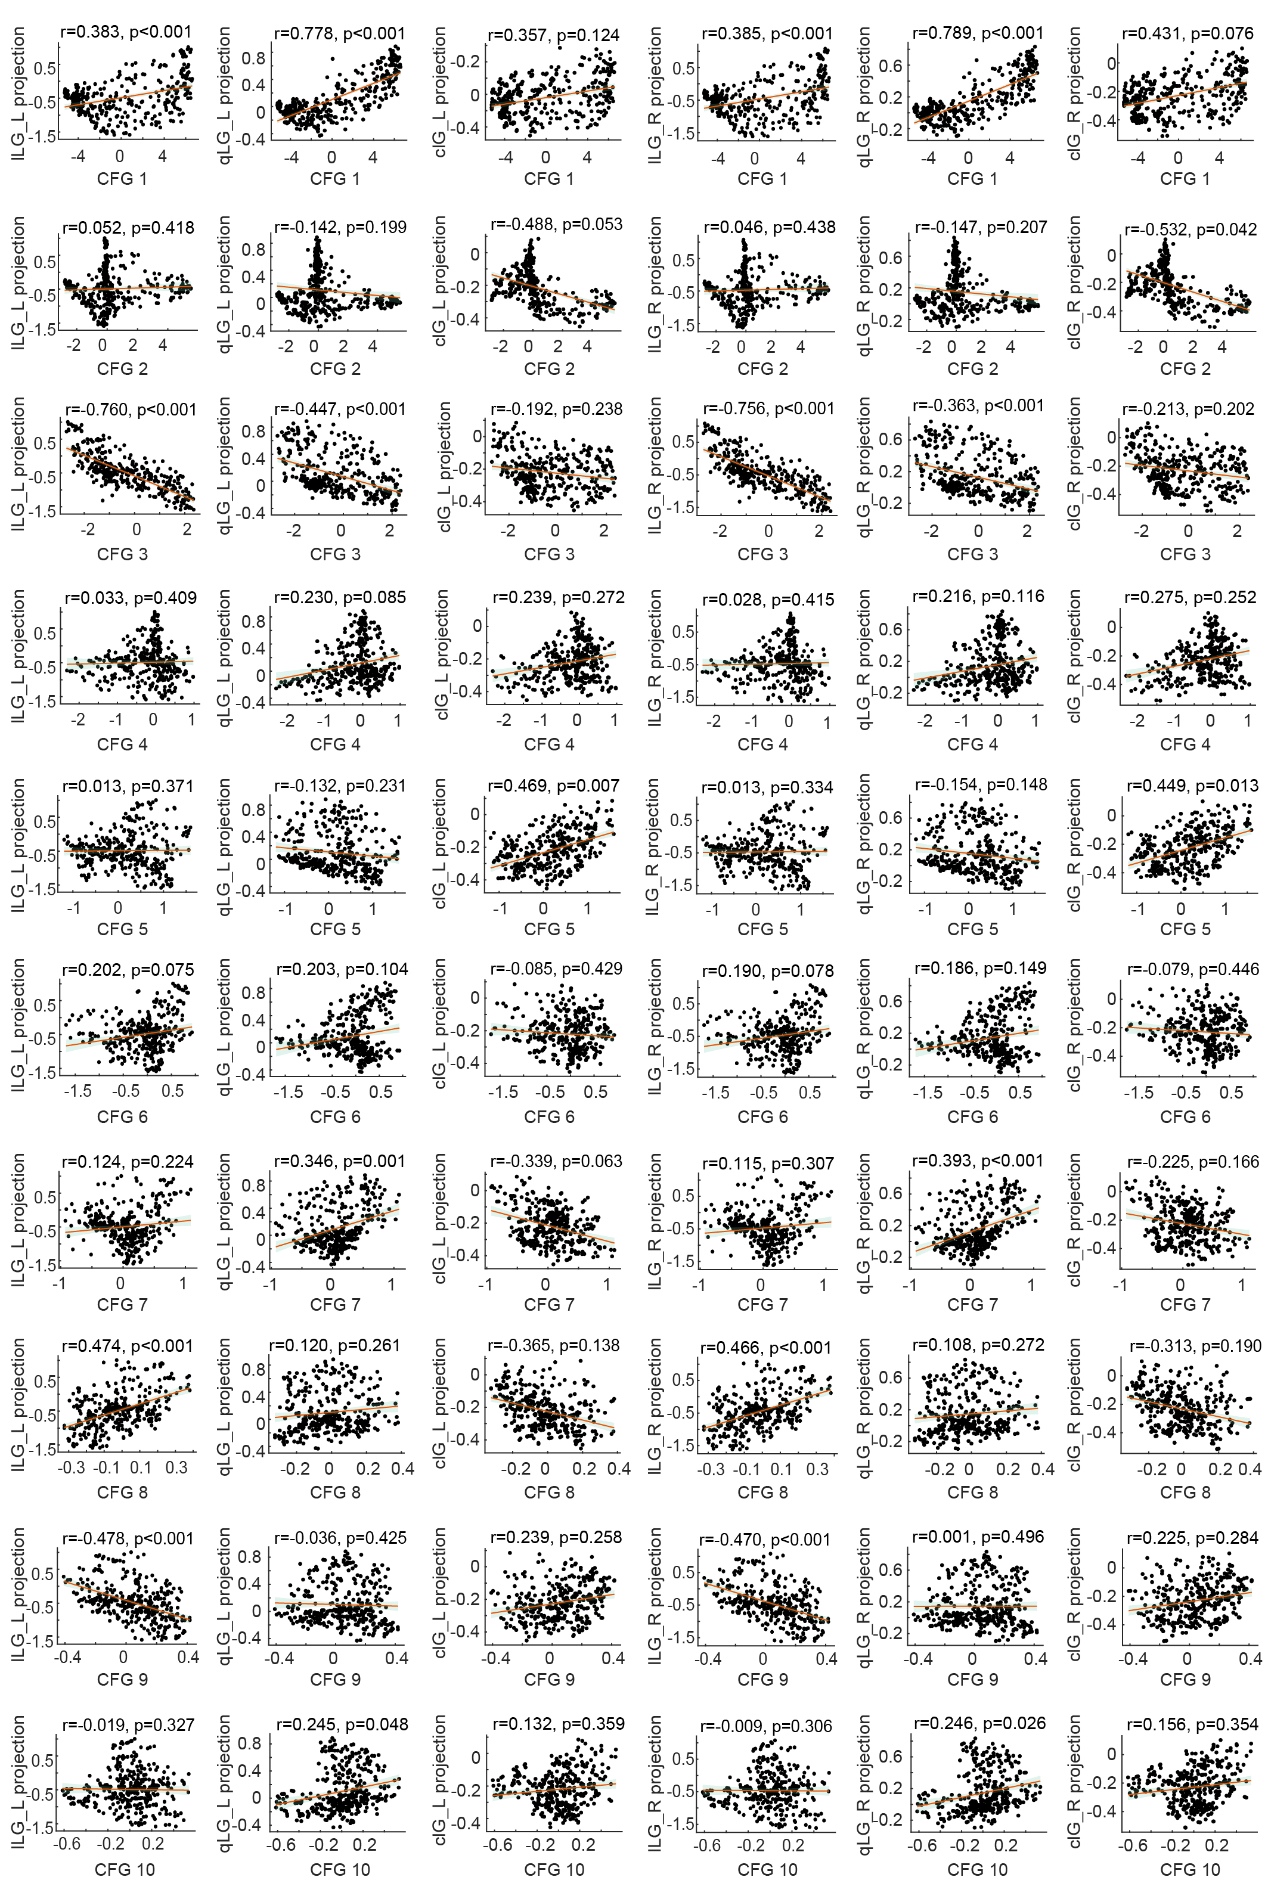


**Supplementary Fig. 3 The associations between hippocampal projection maps and cortical functional gradients.**


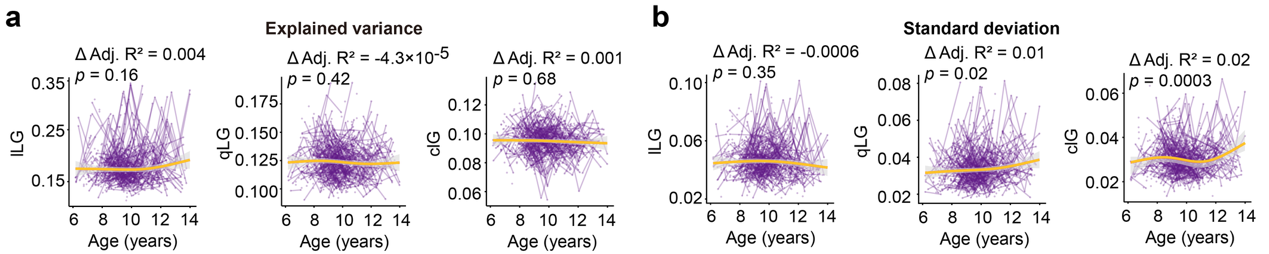


**Supplementary Fig. 4 Replication results for the development of explained variance and standard deviation of hippocampal triple gradients on CBD dataset****,** **respectively.**

Supplementary Tables

**Supplementary Table 1. Δ Adjusted and FDR-corrected *p* value for three bins along the group-averaged T1w/T2w axis**

| Bin | T1w/T2w | | G1 (lLG) | | G2 (qLG) | | G3 (IAG) | |
| --- | --- | --- | --- | --- | --- | --- | --- | --- |
| Δ Adj. | *p* value | Δ Adj. | *p* value | Δ Adj. | *p* value | Δ Adj. | *p* value |
| 1 | 0.1596 | <1E-16 | 0.0076 | 0.0008 | -0.0066 | 0.0029 | 3.09E-6 | 0.8818 |
| 2 | 0.1979 | <1E-16 | -1.6 E-04 | 0.2739 | -1.04E-7 | 0.4773 | 3.01E-6 | 0.8818 |
| 3 | 0.2377 | <1E-16 | -0.0158 | 8.43E-6 | 0.0207 | <1E-16 | 2.10E-5 | 0.8818 |

**Supplementary Table 2. Δ Adjusted and FDR-corrected *p* value for six bins along the group-averaged T1w/T2w axis**

| Bin | T1w/T2w | | G1 (lLG) | | G2 (qLG) | | G3 (IAG) | |
| --- | --- | --- | --- | --- | --- | --- | --- | --- |
| Δ Adj. | *p* value | Δ Adj. | *p* value | Δ Adj. | *p* value | Δ Adj. | *p* value |
| 1 | 0.1507 | <1E-16 | 0.0084 | 0.0010 | -0.0028 | 0.0617 | -0.0009 | 0.4072 |
| 2 | 0.1628 | <1E-16 | 0.0009 | 0.1365 | -0.0019 | 0.0935 | -6.39E-8 | 0.9801 |
| 3 | 0.1858 | <1E-16 | 1.45E-6 | 0.9168 | -0.0003 | 0.2811 | 2.25E-6 | 0.9909 |
| 4 | 0.2172 | <1E-16 | -0.0034 | 0.0414 | -1.64E-6 | 0.7249 | 3.26E-6 | 0.9909 |
| 5 | 0.2335 | <1E-16 | -0.0133 | 0.0001 | 0.0135 | 4.75E-5 | -1.87E-6 | 0.9909 |
| 6 | 0.2366 | <1E-16 | -0.0097 | 0.0002 | 0.0158 | 2.05E-5 | 0.0017 | 0.4072 |

**Supplementary Table 3. Δ Adjusted and FDR-corrected *p* value for twelve bins along the group-averaged T1w/T2w axis**

| Bin | T1w/T2w | | G1 (lLG) | | G2 (qLG) | | G3 (IAG) | |
| --- | --- | --- | --- | --- | --- | --- | --- | --- |
| Δ Adj. | *p* value | Δ Adj. | *p* value | Δ Adj. | *p* value | Δ Adj. | *p* value |
| 1 | 0.1282 | <1E-16 | 0.0247 | <1E-16 | -0.0029 | 0.0702 | -0.0009 | 0.6610 |
| 2 | 0.1540 | <1E-16 | 0.0003 | 0.2891 | -0.0003 | 0.3988 | -0.0005 | 0.6819 |
| 3 | 0.1565 | <1E-16 | 0.0005 | 0.2622 | -0.0020 | 0.0949 | 5.11E-5 | 0.7720 |
| 4 | 0.1706 | <1E-16 | 1.28E-7 | 0.4351 | -2.15E-6 | 0.9862 | 1.53E-6 | 0.9583 |
| 5 | 0.1772 | <1E-16 | 3.79E-5 | 0.3861 | -1.60E-5 | 0.4233 | 2.19E-6 | 0.9583 |
| 6 | 0.1991 | <1E-16 | -0.0010 | 0.2244 | -4.39E-5 | 0.4233 | 8.87E-7 | 0.7865 |
| 7 | 0.2134 | <1E-16 | -3.51E-6 | 0.3899 | 1.20E-6 | 0.8249 | -2.67E-6 | 0.7784 |
| 8 | 0.2215 | <1E-16 | -0.0075 | 0.0040 | 6.39E-6 | 0.4325 | 0.0004 | 0.6819 |
| 9 | 0.2322 | <1E-16 | -0.0096 | 0.0007 | 0.0023 | 0.0949 | 9.68E-7 | 0.8043 |
| 10 | 0.2316 | <1E-16 | -0.0109 | 0.0004 | 0.0218 | <1E-16 | -7.33E-7 | 0.7865 |
| 11 | 0.2391 | <1E-16 | -0.0149 | 1.50E-5 | 0.0177 | 8.92E-6 | 0.0027 | 0.4340 |
| 12 | 0.2229 | <1E-16 | -0.0011 | 0.1928 | 0.0056 | 0.0162 | -1.18E-7 | 0.7865 |

**Supplementary Table 4. Δ Adjusted and FDR-corrected *p* value for fifteen bins along the group-averaged T1w/T2w axis**

| Bin | T1w/T2w | | G1 (lLG) | | G2 (qLG) | | G3 (IAG) | |
| --- | --- | --- | --- | --- | --- | --- | --- | --- |
| Δ Adj. | *p* value | Δ Adj. | *p* value | Δ Adj. | *p* value | Δ Adj. | *p* value |
| 1 | 0.1199 | <1E-16 | 0.0232 | <1E-16 | -0.0029 | 0.0682 | -0.0004 | 0.4881 |
| 2 | 0.1524 | <1E-16 | 0.0024 | 0.0510 | -0.0030 | 0.0682 | -0.0002 | 0.4881 |
| 3 | 0.1568 | <1E-16 | 0.0007 | 0.2421 | 9.98E-7 | 0.6996 | 3.00E-6 | 0.7896 |
| 4 | 0.1564 | <1E-16 | -1.36E-6 | 0.7956 | -0.0015 | 0.1452 | 0.0003 | 0.4881 |
| 5 | 0.1723 | <1E-16 | 7.75E-6 | 0.4625 | 2.56E-6 | 0.9859 | 1.39E-6 | 0.7896 |
| 6 | 0.1795 | <1E-16 | 4.73E-7 | 0.5380 | -1.31E-7 | 0.5927 | -2.80E-7 | 0.6933 |
| 7 | 0.1908 | <1E-16 | -2.90E-10 | 0.7956 | -1.02E-5 | 0.5927 | -0.0015 | 0.4661 |
| 8 | 0.2041 | <1E-16 | -0.0009 | 0.2421 | -2.93E-6 | 0.5927 | -1.91E-6 | 0.7896 |
| 9 | 0.2126 | <1E-16 | -5.16E-6 | 0.4866 | -5.51E-7 | 0.9859 | -0.0004 | 0.4881 |
| 10 | 0.2192 | <1E-16 | -0.0069 | 0.0059 | 4.96E-7 | 0.5927 | 0.0014 | 0.4661 |
| 11 | 0.2320 | <1E-16 | -0.0078 | 0.0020 | 0.0005 | 0.3771 | -1.82E-6 | 0.6373 |
| 12 | 0.2329 | <1E-16 | -0.0094 | 0.0003 | 0.0165 | 1.62E-5 | 2.40E-6 | 0.6373 |
| 13 | 0.2279 | <1E-16 | -0.0100 | 0.0002 | 0.0216 | <1E-16 | 0.0011 | 0.4661 |
| 14 | 0.2420 | <1E-16 | -0.0137 | 9.25E-5 | 0.0139 | 6.38E-5 | 0.0014 | 0.4661 |
| 15 | 0.2177 | <1E-16 | -0.0007 | 0.2421 | 0.0064 | 0.0085 | -7.19E-7 | 0.7513 |
