# Supplementary material for: Deciphering developmental gradients in human hippocampus
Source: Research Square preprint supplement (doi:10.21203/rs.3.rs-8009443/v1), 2025-12-10
Supplement: Supplementary file 3 [file 55452ce3eb94382062b6a4bb.xlsx]

## Sheet: Annotation
MyList	Gene ID	Type	Tax ID	Homologene Gene ID	Homologene Gene Tax ID	Gene Symbol	Description	Protein Functions (ChatGPT)	Disease & Drugs (ChatGPT)	Biological Process (GO)	Kinase Class (UniProt)	Protein Function (Protein Atlas)	Subcellular Location (Protein Atlas)	Drug (DrugBank)	Canonical Pathways	Hallmark Gene Sets	hsa04024 cAMP signaling pathway	GO:0060485 mesenchyme development	GO:0061061 muscle structure development	GO:0010976 positive regulation of neuron	GO:0072594 establishment of protein local	GO:0006979 response to oxidative stress	GO:1903311 regulation of mRNA metabolic p	GO:0048167 regulation of synaptic plastic	GO:0006897 endocytosis
SYTL2	54843	symbol	H. sapiens	54843	H. sapiens	SYTL2	synaptotagmin like 2	SYTL2 is a human gene that encodes for a synaptotagmin-like protein (SLP) belonging to a protein family containing a C2 domain. The SLP homology domain (SHD) of this protein specifically binds to the GTP-bound form of Rab-27A, a protein involved in vesicle trafficking. SYTL2 plays a role in RAB27A-dependent vesicle trafficking and controls the distribution of melanosome in the cell periphery. Alt…	There is limited information available on the disease implications of SYTL2. However, recent studies have suggested that mutations in SYTL2 may be associated with certain neurological disorders, including autism spectrum disorder and schizophrenia. Targeted drug discovery efforts for SYTL2 are currently underway, with a focus on developing small molecule inhibitors that can modulate the protein's…	GO:0006904 vesicle docking involved in exocytosis;GO:0048278 vesicle docking;GO:0140029 exocytic process		Predicted intracellular proteins; Transporters	Golgi apparatus;Nucleoplasm (Approved); Additional: Plasma membrane			(M5924)HALLMARK MTORC1 SIGNALING	0.0	0.0	0.0	0.0	0.0	0.0	0.0	0.0	0.0
NR2F2	7026	symbol	H. sapiens	7026	H. sapiens	NR2F2	nuclear receptor subfamily 2 group F member 2	NR2F2 is a gene that belongs to the steroid thyroid hormone superfamily of nuclear receptors. It encodes a transcription factor that can be activated by ligands and is involved in regulating the expression of various genes. The gene has multiple transcript variants due to alternate splicing.	NR2F2 has been implicated in various diseases, including cancer, metabolic disorders, and cardiovascular diseases. In cancer, NR2F2 has been shown to promote tumor growth and metastasis in several types of cancer, including breast, prostate, and lung cancer. Therefore, targeting NR2F2 has emerged as a potential therapeutic strategy for cancer treatment. Several small molecule inhibitors of NR2F2 …	GO:0009956 radial pattern formation;GO:0060838 lymphatic endothelial cell fate commitment;GO:0060836 lymphatic endothelial cell differentiation		Human disease related genes:Congenital malformations:Congenital malformations of the circulatory system; Predicted intracellular proteins; Human disease related genes:Reproductive system diseases:Reproductive system diseases; Nuclear receptors; Disease related genes; Transcription factors:Zinc-coordinating DNA-binding domains	Nucleoplasm (Approved); Additional: Cytosol		(M285)PID HNF3A PATHWAY; (M105)PID TELOMERASE PATHWAY		0.0	0.0	1.0	0.0	0.0	0.0	0.0	0.0	0.0
KCNK12	56660	symbol	H. sapiens	56660	H. sapiens	KCNK12	potassium two pore domain channel subfamily K member 12	The KCNK12 gene belongs to the family of potassium channel proteins that have two pore-forming P domains. However, it has not been proven to be a functional channel on its own and may require other non-pore-forming proteins to be active.	There is limited information available on the disease implications of KCNK12 gene mutations. However, some studies have suggested that mutations in this gene may be associated with certain neurological disorders, such as epilepsy and migraine. Targeted drug discovery efforts for KCNK12 have been focused on developing drugs that modulate the activity of potassium channels, which could potentially …	GO:0071805 potassium ion transmembrane transport;GO:0006813 potassium ion transport;GO:0030001 metal ion transport		Voltage-gated ion channels:Two-P Potassium Channels					0.0	0.0	0.0	0.0	0.0	0.0	0.0	0.0	0.0
SORCS3	22986	symbol	H. sapiens	22986	H. sapiens	SORCS3	sortilin related VPS10 domain containing receptor 3	SORCS3 is a gene that encodes a transmembrane protein belonging to the vacuolar protein sorting 10 receptor family. It contains a vacuolar protein sorting 10 domain at the N-terminus, which is followed by a leucine-rich segment, a transmembrane domain, and a short C-terminal cytoplasmic domain. The gene is highly expressed in the brain and has been associated with Alzheimer's disease. Knockdown o…	SORCS3 has been implicated in Alzheimer's disease, as it is involved in the processing of amyloid precursor protein (APP), a key player in the formation of amyloid plaques in the brain. Studies have shown that knockdown of SORCS3 in cell culture leads to an increase in APP processing, suggesting that the protein may play a role in regulating APP metabolism. Targeted drug discovery efforts for Alz…	GO:1900452 regulation of long-term synaptic depression;GO:0099170 postsynaptic modulation of chemical synaptic transmission;GO:0007218 neuropeptide signaling pathway		Predicted intracellular proteins; Transporters					0.0	0.0	0.0	0.0	0.0	0.0	0.0	1.0	0.0
A_23_P213527						None	None	None	None	None	None	None	None	None	None	None	nan	nan	nan	nan	nan	nan	nan	nan	nan
RSPH9	221421	symbol	H. sapiens	221421	H. sapiens	RSPH9	radial spoke head component 9	RSPH9 is a human gene that is believed to play a role in the radial spoke head of motile cilia and flagella. Mutations in this gene have been linked to primary ciliary dyskinesia 12, a rare genetic disorder that affects the function of cilia and flagella. Alternative splicing of the RSPH9 gene results in the production of multiple transcript variants.	Primary ciliary dyskinesia (PCD) is a rare genetic disorder that affects the function of cilia and flagella, leading to chronic respiratory infections, infertility, and other symptoms. Mutations in the RSPH9 gene have been linked to PCD12, which is characterized by impaired ciliary and flagellar function. Currently, there are no targeted drug therapies available for PCD, and treatment is mainly s…	GO:0062177 radial spoke assembly;GO:1904158 axonemal central apparatus assembly;GO:0044458 motile cilium assembly		Disease related genes; Human disease related genes:Respiratory diseases:Tracheobronchial diseases; Predicted intracellular proteins	End piece;Mid piece;Principal piece (Approved); Additional: Acrosome;Equatorial segment				0.0	0.0	0.0	0.0	0.0	0.0	0.0	0.0	0.0
CADM1	23705	symbol	H. sapiens	23705	H. sapiens	CADM1	cell adhesion molecule 1	CADM1, or cell adhesion molecule 1, is a gene that plays a role in cell recognition, positive regulation of cytokine production, and susceptibility to natural killer cell mediated cytotoxicity. It is located in the plasma membrane and is involved in signaling receptor binding activity. CADM1 has been implicated in breast carcinoma and prostate cancer and is a biomarker of cervix uteri carcinoma i…	CADM1 has been implicated in various types of cancer, including breast carcinoma, prostate cancer, and cervix uteri carcinoma in situ. In breast cancer, CADM1 expression has been shown to be downregulated, and its restoration has been suggested as a potential therapeutic strategy. In prostate cancer, CADM1 has been identified as a tumor suppressor gene, and its loss has been associated with disea…	GO:0120154 negative regulation of ERBB4 signaling pathway;GO:0042271 susceptibility to natural killer cell mediated cytotoxicity;GO:0045954 positive regulation of natural killer cell mediated cytotoxicity		Predicted intracellular proteins; Human disease related genes:Cancers:Head and neck cancers	Plasma membrane (Supported)			(M5949)HALLMARK PEROXISOME; (M5930)HALLMARK EPITHELIAL MESENCHYMAL TRANSITION	0.0	0.0	0.0	0.0	0.0	0.0	0.0	0.0	0.0
ZBTB5	9925	symbol	H. sapiens	9925	H. sapiens	ZBTB5	zinc finger and BTB domain containing 5	ZBTB5 is a human gene that encodes a protein containing both zinc finger and BTB domains. This protein is involved in regulating gene expression by binding to specific DNA sequences and repressing transcription by RNA polymerase II. ZBTB5 is primarily located in the nucleus of cells.	ZBTB5 has been implicated in several diseases, including cancer, neurological disorders, and immune system dysfunction. In cancer, ZBTB5 has been shown to act as a tumor suppressor by inhibiting cell proliferation and inducing apoptosis. Targeted drug discovery efforts have focused on identifying small molecules that can modulate ZBTB5 activity, either by promoting its tumor suppressor function o…	GO:0000122 negative regulation of transcription by RNA polymerase II;GO:0045892 negative regulation of DNA-templated transcription;GO:1902679 negative regulation of RNA biosynthetic process		Transcription factors:Zinc-coordinating DNA-binding domains; Predicted intracellular proteins	Nuclear bodies;Nucleoplasm (Approved); Additional: Golgi apparatus				0.0	0.0	0.0	0.0	0.0	0.0	0.0	0.0	0.0
NRG1	3084	symbol	H. sapiens	3084	H. sapiens	NRG1	neuregulin 1	The NRG1 gene, also known as neuregulin 1, encodes a membrane glycoprotein that is involved in cell-cell signaling and is crucial for the growth and development of various organ systems. The gene produces a wide range of isoforms through alternative promoter usage and splicing, which are expressed in a tissue-specific manner and differ significantly in their structure. Dysregulation of NRG1 has b…	NRG1 dysregulation has been implicated in several diseases, including cancer, schizophrenia, and bipolar disorder. In cancer, NRG1 overexpression has been observed in various types of tumors, including breast, lung, and pancreatic cancer, and is associated with poor prognosis. Targeted drug discovery efforts have focused on developing inhibitors of the NRG1 signaling pathway, such as monoclonal a…	GO:1900084 regulation of peptidyl-tyrosine autophosphorylation;GO:1900086 positive regulation of peptidyl-tyrosine autophosphorylation;GO:0038135 ERBB2-ERBB4 signaling pathway		Predicted intracellular proteins; Predicted secreted proteins; Human disease related genes:Other diseases:Mental and behavioural disorders; Disease related genes; Cancer-related genes:Candidate cancer biomarkers	Nucleoplasm (Approved)		(M201)PID ERBB NETWORK PATHWAY; (M33)PID GLYPICAN 1PATHWAY; (M13)PID ERBB4 PATHWAY		1.0	1.0	1.0	0.0	0.0	0.0	0.0	0.0	0.0
LOC100129291	100129291	Gene_ID	H. sapiens	100129291	H. sapiens	LOC100129291	chromosome X open reading frame 49 pseudogene										0.0	0.0	0.0	0.0	0.0	0.0	0.0	0.0	0.0
AL589765.4						None	None	None	None	None	None	None	None	None	None	None	nan	nan	nan	nan	nan	nan	nan	nan	nan
A_24_P567349						None	None	None	None	None	None	None	None	None	None	None	nan	nan	nan	nan	nan	nan	nan	nan	nan
BCL7B	9275	symbol	H. sapiens	9275	H. sapiens	BCL7B	BAF chromatin remodeling complex subunit BCL7B	BCL7B is a gene that belongs to the BCL7 family, which also includes BCL7A and BCL7C proteins. BCL7B is highly similar to the N-terminal segment of BCL7A or BCL7C proteins. The BCL7A protein is involved in a three-way gene translocation in a Burkitt lymphoma cell line. BCL7B is located in a chromosomal region that is commonly deleted in Williams syndrome. The gene is highly conserved from C. eleg…	There is limited information available on the disease implications of BCL7B. However, some studies have suggested that BCL7B may play a role in the development of certain types of cancer, including breast cancer and leukemia. Targeted drug discovery efforts for BCL7B are also limited, but some studies have explored the potential of targeting BCL7B as a therapeutic strategy for cancer treatment. O…	GO:2000819 regulation of nucleotide-excision repair;GO:0070316 regulation of G0 to G1 transition;GO:1902459 positive regulation of stem cell population maintenance		Disease related genes; Human disease related genes:Other congenital disorders:Chromosomal abnormalities; Predicted intracellular proteins	Nucleoplasm (Approved)				0.0	0.0	0.0	0.0	0.0	0.0	0.0	0.0	0.0
EIF2S3	1968	symbol	H. sapiens	1968	H. sapiens	EIF2S3	eukaryotic translation initiation factor 2 subunit gamma	EIF2S3 is a human gene that encodes the largest subunit of a heterotrimeric GTP-binding protein. This protein is involved in the recruitment of methionyl-tRNA(i) to the 40 S ribosomal subunit, which is essential for the initiation of protein synthesis. The gene is located on chromosome X and mutations in this gene have been associated with intellectual disability and developmental delay. The prot…	There are currently no targeted drug discovery efforts specifically focused on EIF2S3. However, dysregulation of the protein synthesis pathway, in which EIF2S3 plays a crucial role, has been implicated in various diseases, including cancer. As such, there are several drugs on the market that target this pathway, such as mTOR inhibitors (e.g. rapamycin) and eIF4E inhibitors (e.g. ribavirin). These…	GO:0001731 formation of translation preinitiation complex;GO:0002183 cytoplasmic translational initiation;GO:0006413 translational initiation		Predicted intracellular proteins; Potential drug targets; Human disease related genes:Congenital malformations:Other congenital malformations; Disease related genes; ENZYME proteins:Hydrolases; Enzymes		Guanosine-5'-Diphosphate		(M5941)HALLMARK UV RESPONSE UP	0.0	0.0	0.0	0.0	0.0	0.0	0.0	0.0	0.0
RP4-751H13.1						None	None	None	None	None	None	None	None	None	None	None	nan	nan	nan	nan	nan	nan	nan	nan	nan
SFXN4	119559	symbol	H. sapiens	119559	H. sapiens	SFXN4	sideroflexin 4	SFXN4, also known as sideroflexin 4, is a gene that encodes a transmembrane protein found in the inner mitochondrial membrane. This protein is essential for maintaining mitochondrial respiratory homeostasis and erythropoiesis. Mutations in SFXN4 have been linked to mitochondriopathy and macrocytic anemia. There are multiple variants of the SFXN4 gene due to alternative splicing.	Mutations in the SFXN4 gene have been linked to several diseases, including mitochondrial disorders and macrocytic anemia. Mitochondrial disorders are a group of genetic diseases that affect the function of mitochondria, leading to a wide range of symptoms, including muscle weakness, neurological problems, and developmental delays. Macrocytic anemia is a type of anemia characterized by abnormally…	GO:1990542 mitochondrial transmembrane transport;GO:0006865 amino acid transport;GO:0006839 mitochondrial transport		Predicted intracellular proteins; Human disease related genes:Congenital disorders of metabolism:Mitochondrial diseases; Transporters:Electrochemical Potential-driven transporters; Potential drug targets; Disease related genes	Mitochondria;Nucleoplasm (Approved); Additional: Vesicles				0.0	0.0	0.0	0.0	0.0	0.0	0.0	0.0	0.0
GCC2	9648	symbol	H. sapiens	9648	H. sapiens	GCC2	GRIP and coiled-coil domain containing 2	GCC2, or GRIP and coiled-coil domain containing 2, is a gene that encodes a peripheral membrane protein found in the trans-Golgi network. It is sensitive to brefeldin A, a drug that disrupts the Golgi apparatus. The protein contains a GRIP domain, which is believed to be involved in targeting. Alternative splicing of the gene results in multiple transcript variants. Overall, GCC2 plays a role in …	There is limited information available on the disease implications of GCC2. However, some studies have suggested that mutations in the gene may be associated with certain types of cancer, including breast cancer and lung adenocarcinoma. Targeted drug discovery efforts for GCC2 are also limited, as the function of the protein is not fully understood. However, some studies have suggested that targe…	GO:0071955 recycling endosome to Golgi transport;GO:0034499 late endosome to Golgi transport;GO:0090161 Golgi ribbon formation		Predicted intracellular proteins	Golgi apparatus (Enhanced); Additional: Nucleoplasm				0.0	1.0	0.0	0.0	1.0	0.0	0.0	0.0	0.0
RERG	85004	symbol	H. sapiens	85004	H. sapiens	RERG	RAS like estrogen regulated growth inhibitor	RERG is a gene that belongs to the RAS superfamily of GTPases. It acts as a growth inhibitor, preventing cell proliferation and tumor formation. The gene is regulated by estrogen and is therefore referred to as RAS like estrogen regulated growth inhibitor. Its function is important in understanding the development and progression of cancer, as well as potential therapeutic targets for cancer trea…	Research on RERG has shown that it is downregulated in various types of cancer, including breast, ovarian, and prostate cancer. This suggests that RERG may play a role in tumor suppression and that its loss may contribute to cancer development and progression. As a result, RERG has been identified as a potential therapeutic target for cancer treatment. However, there are currently no drugs on the…	GO:0030308 negative regulation of cell growth;GO:0045926 negative regulation of growth;GO:0007264 small GTPase-mediated signal transduction		ENZYME proteins:Hydrolases; Enzymes; Predicted intracellular proteins	Cytosol;Nucleoplasm (Approved); Additional: Nucleoli fibrillar center				0.0	0.0	0.0	0.0	0.0	0.0	0.0	0.0	0.0
NEURL1B	54492	symbol	H. sapiens	54492	H. sapiens	NEURL1B	neuralized E3 ubiquitin protein ligase 1B	NEURL1B is a human gene that encodes for a protein called neuralized E3 ubiquitin protein ligase 1B. This protein is predicted to have the ability to act as an enzyme that attaches ubiquitin molecules to other proteins, a process known as ubiquitination. NEURL1B is also predicted to be involved in a specific type of endocytosis that is dependent on ubiquitin. The protein is located in the actin c…	There is limited information available on the disease implications of NEURL1B. However, recent studies have suggested that mutations in this gene may be associated with the development of certain types of cancer, including breast cancer and glioblastoma. Targeted drug discovery efforts for NEURL1B are currently underway, with a focus on developing small molecule inhibitors that can selectively ta…	GO:0070086 ubiquitin-dependent endocytosis;GO:0007219 Notch signaling pathway;GO:0072594 establishment of protein localization to organelle		Enzymes; Predicted intracellular proteins; ENZYME proteins:Transferases	Cytosol (Supported); Additional: Actin filaments				0.0	0.0	0.0	0.0	1.0	0.0	0.0	0.0	1.0
ROCK2	9475	symbol	H. sapiens	9475	H. sapiens	ROCK2	Rho associated coiled-coil containing protein kinase 2	ROCK2 is a gene that encodes a protein called Rho-associated coiled-coil containing protein kinase 2. This protein is a type of enzyme that regulates various cellular processes, including cytokinesis (cell division), smooth muscle contraction, and the formation of actin stress fibers and focal adhesions. It is also involved in the activation of the c-fos serum response element. ROCK2 is an isozym…	ROCK2 has been implicated in various diseases, including cancer, cardiovascular diseases, and neurological disorders. In cancer, ROCK2 has been shown to promote tumor growth, invasion, and metastasis by regulating cell migration and invasion. In cardiovascular diseases, ROCK2 is involved in the regulation of vascular smooth muscle contraction and endothelial dysfunction. In neurological disorders…	GO:0032723 positive regulation of connective tissue growth factor production;GO:0150033 negative regulation of protein localization to lysosome;GO:0010825 positive regulation of centrosome duplication	yes	Predicted intracellular proteins; ENZYME proteins:Transferases; FDA approved drug targets:Small molecule drugs; Kinases:AGC Ser/Thr protein kinases; Enzymes	Cytosol (Supported)	Fasudil; Y-27632; Fostamatinib; Ripasudil; Netarsudil	(M138)PID THROMBIN PAR4 PATHWAY; (M63)PID AVB3 OPN PATHWAY; (M16801)SIG REGULATION OF THE ACTIN CYTOSKELETON BY RHO GTPASES		1.0	1.0	0.0	0.0	0.0	0.0	1.0	0.0	0.0
SPRN	503542	symbol	H. sapiens	503542	H. sapiens	SPRN	shadow of prion protein	The human gene SPRN is predicted to have nucleic acid binding activity and be involved in protein import into the nucleus. It is also predicted to be located in the membrane and active in the nucleus. SPRN is known as the shadow of prion protein, as it shares similarities with the prion protein but does not have the ability to cause prion diseases. The function of SPRN is not fully understood, bu…	There is currently no known disease directly associated with mutations in the SPRN gene. However, research has suggested that SPRN may play a role in neurodegenerative diseases such as Alzheimer's and Parkinson's. Targeted drug discovery efforts for SPRN are still in the early stages, as the function of the gene is not fully understood. However, some studies have suggested that targeting SPRN cou…	GO:0006606 protein import into nucleus;GO:0051170 import into nucleus;GO:0034504 protein localization to nucleus		Transporters:Transporter channels and pores; Predicted intracellular proteins					0.0	0.0	0.0	0.0	1.0	0.0	0.0	0.0	0.0
SEC14L1	6397	symbol	H. sapiens	6397	H. sapiens	SEC14L1	SEC14 like lipid binding 1	SEC14L1 is a human gene that belongs to the SEC14 cytosolic factor family. It shares similarities with yeast SEC14 and Japanese flying squid RALBP, indicating a potential role in intracellular transport. The gene has multiple alternatively spliced transcript variants, some of which include exons from the upstream gene C17orf86.	There is limited information available on the disease implications of SEC14L1. However, recent studies have suggested that the gene may play a role in cancer progression and metastasis. Specifically, SEC14L1 has been found to be upregulated in several types of cancer, including breast, lung, and pancreatic cancer. Targeted drug discovery efforts for SEC14L1 are still in the early stages, but ther…	GO:0039536 negative regulation of RIG-I signaling pathway;GO:0015871 choline transport;GO:0039535 regulation of RIG-I signaling pathway		Predicted intracellular proteins; Transporters	Cytosol;Nucleoplasm (Supported)			(M5945)HALLMARK HEME METABOLISM	0.0	0.0	0.0	0.0	0.0	0.0	0.0	0.0	0.0
MRPS11	64963	symbol	H. sapiens	64963	H. sapiens	MRPS11	mitochondrial ribosomal protein S11	The human gene MRPS11 encodes a mitochondrial ribosomal protein S11, which is involved in protein synthesis within the mitochondrion. Mitochondrial ribosomes consist of a small 28S subunit and a large 39S subunit, with an estimated 75% protein to rRNA composition. Mammalian mitoribosomes differ from prokaryotic ribosomes in that they lack a 5S rRNA. The proteins comprising the mitoribosome differ…	There is limited information available on the disease implications of MRPS11. However, mutations in other mitochondrial ribosomal proteins have been associated with a range of mitochondrial disorders, including Leigh syndrome, mitochondrial encephalomyopathy, and mitochondrial myopathy. Targeted drug discovery efforts for mitochondrial disorders have focused on improving mitochondrial function an…	GO:0032543 mitochondrial translation;GO:0140053 mitochondrial gene expression;GO:0006412 translation		Ribosomal proteins; Predicted intracellular proteins	Mitochondria (Supported)			(M5936)HALLMARK OXIDATIVE PHOSPHORYLATION	0.0	0.0	0.0	0.0	0.0	0.0	0.0	0.0	0.0
ENO3	2027	symbol	H. sapiens	2027	H. sapiens	ENO3	enolase 3	ENO3 is a gene that encodes for one of the three enolase isoenzymes found in mammals. This particular isoenzyme is present in skeletal muscle cells in adults and may have a role in muscle development and regeneration. During development in rodents, there is a switch from alpha enolase to beta enolase in muscle tissue. Mutations in ENO3 have been linked to glycogen storage disease. There are diffe…	Mutations in ENO3 have been linked to glycogen storage disease, specifically type XIII. This disease is characterized by the accumulation of glycogen in the liver and muscles, leading to muscle weakness, fatigue, and liver dysfunction. There are currently no targeted drug discovery efforts for ENO3-related diseases, but research is ongoing to better understand the role of this gene in muscle deve…	GO:0006735 NADH regeneration;GO:0061621 canonical glycolysis;GO:0061718 glucose catabolic process to pyruvate		ENZYME proteins:Lyases; Predicted intracellular proteins; Potential drug targets; Human disease related genes:Congenital disorders of metabolism:Congenital disorders of carbohydrate metabolism; Candidate cardiovascular disease genes; Disease related genes; Enzymes	Cytosol;Plasma membrane (Enhanced)	2-phospho-D-glyceric acid; Phosphoenolpyruvate; 2-Phosphoglycolic Acid; Phosphonoacetohydroxamic Acid		(M5935)HALLMARK FATTY ACID METABOLISM; (M5947)HALLMARK IL2 STAT5 SIGNALING; (M5891)HALLMARK HYPOXIA	0.0	0.0	0.0	0.0	0.0	0.0	0.0	0.0	0.0
STAU2	27067	symbol	H. sapiens	27067	H. sapiens	STAU2	staufen double-stranded RNA binding protein 2	STAU2 is a gene that encodes for the Staufen homolog 2 protein, which belongs to a family of proteins that bind to double-stranded RNA (dsRNA) and are involved in transporting or localizing mRNA molecules to different parts of the cell. The protein contains three copies of a conserved dsRNA binding domain, suggesting it may be involved in dsRNA binding events. While the exact function of STAU2 is…	STAU2 has been implicated in several diseases, including cancer, neurodegenerative disorders, and viral infections. In cancer, STAU2 has been shown to be upregulated in several types of tumors, including breast, lung, and colon cancer, and may play a role in tumor growth and metastasis. In neurodegenerative disorders, STAU2 has been linked to the formation of protein aggregates, which are a hallm…	GO:0098964 anterograde dendritic transport of messenger ribonucleoprotein complex;GO:1900454 positive regulation of long-term synaptic depression;GO:0008298 intracellular mRNA localization		Predicted intracellular proteins	Nucleoplasm (Supported); Additional: Cytosol				0.0	0.0	0.0	1.0	0.0	1.0	0.0	1.0	0.0
A_32_P59606						None	None	None	None	None	None	None	None	None	None	None	nan	nan	nan	nan	nan	nan	nan	nan	nan
GTDC1	79712	symbol	H. sapiens	79712	H. sapiens	GTDC1	glycosyltransferase like domain containing 1	GTDC1 is a human gene that is predicted to have glycosyltransferase activity. It contains a glycosyltransferase-like domain and is involved in the transfer of sugar molecules to other molecules. The function of this gene is not yet fully understood, but it may play a role in various biological processes such as cell signaling, protein modification, and immune response. Further research is needed …	Unfortunately, there is currently limited information available on the disease implications and targeted drug discovery efforts for GTDC1. As the function of this gene is not yet fully understood, it is difficult to predict its potential role in disease development or treatment. Additionally, there are no known drugs on the market that specifically target GTDC1. However, further research on the f…	GO:0006400 tRNA modification;GO:0008033 tRNA processing;GO:0009451 RNA modification		Predicted intracellular proteins	Cytosol (Approved)				0.0	0.0	0.0	0.0	0.0	0.0	0.0	0.0	0.0
LRRC40	55631	symbol	H. sapiens	55631	H. sapiens	LRRC40	leucine rich repeat containing 40	The LRRC40 gene, also known as leucine rich repeat containing 40, is predicted to have the ability to enable protein serine/threonine phosphatase activity and be involved in signal transduction. It is located in the membrane. This information was provided by the Alliance of Genome Resources in April 2022.	There is limited information available on the disease implications of the LRRC40 gene. However, some studies have suggested that it may be involved in the development and progression of certain types of cancer, including breast cancer and lung cancer. As for targeted drug discovery efforts, there are currently no known drugs that specifically target LRRC40. However, there are ongoing efforts to d…	GO:0035556 intracellular signal transduction;GO:0007165 signal transduction;GO:0023052 signaling		Predicted intracellular proteins	Nucleoli (Approved)				0.0	0.0	0.0	0.0	0.0	0.0	0.0	0.0	0.0
A_23_P112100						None	None	None	None	None	None	None	None	None	None	None	nan	nan	nan	nan	nan	nan	nan	nan	nan
SEMA6D	80031	symbol	H. sapiens	80031	H. sapiens	SEMA6D	semaphorin 6D	SEMA6D is a gene that encodes for a transmembrane semaphorin, a protein that plays a role in axon pathfinding, fasciculation, and branching. Semaphorins are a large family of proteins that can act as inhibitors or chemorepellents in these processes. The SEMA6D protein has a semaphorin domain and a PSI domain in its extracellular portion, and can act as a repulsive axon guidance cue. The gene demo…	SEMA6D has been implicated in various diseases and disorders, including cancer, neurodevelopmental disorders, and cardiovascular diseases. In cancer, SEMA6D has been shown to promote tumor growth and metastasis in several types of cancer, including breast, lung, and pancreatic cancer. Targeting SEMA6D has been proposed as a potential therapeutic strategy for cancer treatment. In neurodevelopmenta…	GO:0002291 T cell activation via T cell receptor contact with antigen bound to MHC molecule on antigen presenting cell;GO:0014909 smooth muscle cell migration;GO:0014812 muscle cell migration		Predicted intracellular proteins	Plasma membrane (Approved); Additional: Golgi apparatus		(M5880)NABA ECM AFFILIATED; (M5885)NABA MATRISOME ASSOCIATED; (M5889)NABA MATRISOME		0.0	1.0	0.0	1.0	0.0	0.0	0.0	0.0	0.0
A_24_P188105						None	None	None	None	None	None	None	None	None	None	None	nan	nan	nan	nan	nan	nan	nan	nan	nan
RBM11	54033	symbol	H. sapiens	54033	H. sapiens	RBM11	RNA binding motif protein 11	RBM11 is a human gene that encodes for RNA binding motif protein 11, which has the ability to bind to poly(U) RNA and form homodimers. It plays a role in cellular response to oxidative stress and regulation of alternative mRNA splicing through the spliceosome. RBM11 is located in the nuclear speck.	There is limited information available on the disease implications of RBM11. However, recent studies have suggested that RBM11 may play a role in the development and progression of certain cancers, including breast cancer and glioblastoma. Targeted drug discovery efforts for RBM11 are currently underway, with a focus on identifying small molecule inhibitors that can selectively target the protein…	GO:0000381 regulation of alternative mRNA splicing, via spliceosome;GO:0048024 regulation of mRNA splicing, via spliceosome;GO:0050684 regulation of mRNA processing		Predicted intracellular proteins	Nucleoplasm (Supported)				0.0	0.0	0.0	0.0	0.0	1.0	1.0	0.0	0.0
RNF166	115992	symbol	H. sapiens	115992	H. sapiens	RNF166	ring finger protein 166	RNF166, also known as ring finger protein 166, is a human gene that is predicted to have ubiquitin protein ligase activity. It is involved in protein polyubiquitination and the ubiquitin-dependent protein catabolic process. RNF166 is predicted to be located in the cytoplasm.	There is limited information available on the disease implications of RNF166. However, recent studies have suggested that RNF166 may play a role in the development and progression of certain types of cancer, including breast cancer and glioblastoma. Targeted drug discovery efforts for RNF166 are still in the early stages, but there is potential for the development of drugs that target the protein…	GO:0000209 protein polyubiquitination;GO:0006914 autophagy;GO:0061919 process utilizing autophagic mechanism		Enzymes; Predicted intracellular proteins; ENZYME proteins:Transferases	Nucleoplasm (Approved); Additional: Cytosol;Plasma membrane				0.0	0.0	0.0	0.0	0.0	0.0	0.0	0.0	0.0
GRIA3	2892	symbol	H. sapiens	2892	H. sapiens	GRIA3	glutamate ionotropic receptor AMPA type subunit 3	GRIA3 is a gene that encodes for a subunit of AMPA-sensitive glutamate receptors, which are important for excitatory neurotransmission in the brain. These receptors are composed of multiple subunits that form ligand-gated ion channels. The classification of glutamate receptors is based on their activation by different pharmacologic agonists. The GRIA3 subunit is subject to RNA editing, which chan…	There is evidence to suggest that mutations in the GRIA3 gene may be associated with certain neurological and psychiatric disorders, including autism spectrum disorder, schizophrenia, and bipolar disorder. Targeted drug discovery efforts have focused on developing drugs that modulate the activity of AMPA receptors, including those containing the GRIA3 subunit. One example of a successful drug tar…	GO:0051290 protein heterotetramerization;GO:0035235 ionotropic glutamate receptor signaling pathway;GO:0051291 protein heterooligomerization		Predicted intracellular proteins; Human disease related genes:Other diseases:Mental and behavioural disorders; Potential drug targets; Disease related genes; Transporters:Transporter channels and pores		Glutamic acid; Butabarbital; Ethanol; Lithium cation; Aniracetam; Talampanel; CX717; Fluciclovine (18F); Lithium citrate; Lithium succinate; Lithium carbonate			1.0	0.0	0.0	0.0	0.0	0.0	0.0	1.0	0.0
CAPRIN1	4076	symbol	H. sapiens	4076	H. sapiens	CAPRIN1	cell cycle associated protein 1	CAPRIN1 is a human gene that encodes for a protein called cell cycle associated protein 1. This protein is involved in RNA binding activity and is predicted to play a role in negative regulation of translation and positive regulation of dendritic spine morphogenesis. CAPRIN1 is located in the cell leading edge and cytosol.	CAPRIN1 has been implicated in several diseases, including cancer, neurodegenerative disorders, and viral infections. In cancer, CAPRIN1 has been shown to promote tumor growth and metastasis by regulating the translation of oncogenic mRNAs. In neurodegenerative disorders, CAPRIN1 has been linked to the formation of toxic protein aggregates, such as those found in Alzheimer's disease. Additionally…	GO:0106288 regulation of deadenylation-dependent decapping of nuclear-transcribed mRNA;GO:0062029 positive regulation of stress granule assembly;GO:0008298 intracellular mRNA localization		Predicted intracellular proteins	Cytosol (Enhanced)				0.0	0.0	0.0	1.0	0.0	0.0	1.0	0.0	0.0
KTELC1	56983	gene_synonym	H. sapiens	56983	H. sapiens	POGLUT1	protein O-glucosyltransferase 1	POGLUT1 is a gene that encodes a protein with both O-glucosyltransferase and O-xylosyltransferase activity. The protein is located in the endoplasmic reticulum and has a KTEL motif that functions as an endoplasmic reticulum retention signal. POGLUT1 is an essential regulator of Notch signaling and is involved in cell fate and tissue formation during development. It may also play a role in the pat…	POGLUT1 has been implicated in several diseases, including Dowling-Degos disease 4, a rare skin disorder characterized by hyperpigmented macules and papules on the skin. Mutations in POGLUT1 have been identified in patients with this disease, suggesting a role in skin pigmentation. Additionally, POGLUT1 has been linked to the pathogenesis of leukemia, with studies showing that it is required for …	GO:0048318 axial mesoderm development;GO:0018242 protein O-linked glycosylation via serine;GO:0010470 regulation of gastrulation		Human disease related genes:Skin diseases:Skin and soft tissue diseases; Human disease related genes:Musculoskeletal diseases:Muscular diseases; Predicted intracellular proteins; ENZYME proteins:Transferases; Potential drug targets; Disease related genes; Enzymes	Endoplasmic reticulum (Supported)				0.0	1.0	1.0	0.0	0.0	0.0	0.0	0.0	0.0
A_32_P61439						None	None	None	None	None	None	None	None	None	None	None	nan	nan	nan	nan	nan	nan	nan	nan	nan
FOXD4L4	349334	symbol	H. sapiens	349334	H. sapiens	FOXD4L4	forkhead box D4 like 4	FOXD4L4 is a human gene that is predicted to have DNA-binding transcription factor activity, specifically for RNA polymerase II and cis-regulatory region sequence-specific DNA binding activity. It is also predicted to be involved in anatomical structure morphogenesis, cell differentiation, and regulation of transcription by RNA polymerase II. The gene is predicted to be located in the nucleus and…	Unfortunately, there is currently limited information available on the disease implications and targeted drug discovery efforts for FOXD4L4. This is likely due to the fact that it is a relatively newly discovered gene and its functions are not yet fully understood. As a result, there are no known drugs on the market that specifically target FOXD4L4. However, as research continues to uncover more …	GO:0009653 anatomical structure morphogenesis;GO:0006357 regulation of transcription by RNA polymerase II;GO:0006355 regulation of DNA-templated transcription		Transcription factors:Helix-turn-helix domains; Predicted intracellular proteins	Nucleoplasm (Approved)				0.0	0.0	0.0	0.0	0.0	0.0	0.0	0.0	0.0
UBL3	5412	symbol	H. sapiens	5412	H. sapiens	UBL3	ubiquitin like 3	The human gene UBL3, also known as ubiquitin like 3, is located in the extracellular exosome. This gene is involved in the process of ubiquitination, which is the attachment of ubiquitin molecules to proteins to regulate their function and degradation. The exact function of UBL3 is not yet fully understood, but it is believed to play a role in protein modification and cellular signaling pathways.…	There is limited information available on the disease implications of UBL3. However, research has suggested that dysregulation of the ubiquitination process, in which UBL3 is involved, can lead to the development of various diseases, including cancer, neurodegenerative disorders, and autoimmune diseases. Therefore, UBL3 may have potential as a therapeutic target for these diseases. Currently, the…			Predicted intracellular proteins	Centrosome (Approved)				0.0	0.0	0.0	0.0	0.0	0.0	0.0	0.0	0.0
PPP1CC	5501	symbol	H. sapiens	5501	H. sapiens	PPP1CC	protein phosphatase 1 catalytic subunit gamma	PPP1CC is a gene that encodes for the gamma isozyme of the protein phosphatase 1 (PP1) catalytic subunit. PP1 is a type of serine/threonine phosphatase that is involved in regulating various cellular processes, including cell division. The gamma isozyme is one of three closely related isoforms of PP1 that are expressed in mammalian cells, with distinct localization patterns. Alternative splicing …	PPP1CC has been implicated in various diseases, including cancer, neurodegenerative disorders, and cardiovascular diseases. In cancer, PPP1CC has been shown to be overexpressed in several types of tumors, including breast, lung, and colon cancer, and is associated with tumor progression and poor prognosis. Targeting PPP1CC with small molecule inhibitors has been explored as a potential therapeuti…	GO:0043153 entrainment of circadian clock by photoperiod;GO:0060252 positive regulation of glial cell proliferation;GO:0009648 photoperiodism		ENZYME proteins:Hydrolases; Enzymes; Predicted intracellular proteins	Cytosol (Supported); Additional: Vesicles	9,10-Deepithio-9,10-Didehydroacanthifolicin; Calyculin A; Motuporin	(M247)PID INSULIN GLUCOSE PATHWAY; (M14)PID AURORA B PATHWAY		1.0	0.0	0.0	1.0	0.0	0.0	0.0	0.0	0.0
ST3GAL2	6483	symbol	H. sapiens	6483	H. sapiens	ST3GAL2	ST3 beta-galactoside alpha-2,3-sialyltransferase 2	ST3GAL2 is a gene that encodes a type II membrane protein responsible for transferring sialic acid from CMP-sialic acid to galactose-containing substrates. This protein is typically found in the Golgi but can also exist in a soluble form. ST3GAL2 belongs to the glycosyltransferase family 29 and can use the same acceptor substrates as sialyltransferase 4A.	ST3GAL2 has been implicated in various diseases, including cancer, autoimmune disorders, and infectious diseases. In cancer, ST3GAL2 has been shown to promote tumor growth and metastasis by modifying cell surface glycosylation patterns. In autoimmune disorders, ST3GAL2 has been linked to the development of multiple sclerosis and rheumatoid arthritis. In infectious diseases, ST3GAL2 has been found…	GO:0010707 globoside biosynthetic process via lactosylceramide;GO:0001575 globoside metabolic process;GO:0001576 globoside biosynthetic process		Enzymes; ENZYME proteins:Transferases	Vesicles (Uncertain)				0.0	0.0	0.0	0.0	0.0	0.0	0.0	0.0	0.0
A_24_P102119						None	None	None	None	None	None	None	None	None	None	None	nan	nan	nan	nan	nan	nan	nan	nan	nan
SCAMP1	9522	symbol	H. sapiens	9522	H. sapiens	SCAMP1	secretory carrier membrane protein 1	SCAMP1 is a gene that encodes for a protein belonging to the SCAMP family of secretory carrier membrane proteins. These proteins act as carriers in post-golgi recycling pathways, transporting cargo to the cell surface. Different members of the SCAMP family are closely related products of distinct genes and are often expressed together, suggesting that they function at the same site during vesicul…	There is limited information on the disease implications of SCAMP1. However, recent studies have suggested that SCAMP1 may play a role in the pathogenesis of Alzheimer's disease. Specifically, it has been shown that SCAMP1 expression is increased in the brains of Alzheimer's patients, and that this increase is associated with the accumulation of amyloid-beta plaques. This suggests that SCAMP1 may…	GO:0006892 post-Golgi vesicle-mediated transport;GO:0006887 exocytosis;GO:0048193 Golgi vesicle transport		Transporters:Accessory Factors Involved in Transport; Predicted intracellular proteins	Cell Junctions (Uncertain); Additional: Nucleoplasm;Vesicles			(M5910)HALLMARK PROTEIN SECRETION	0.0	0.0	0.0	0.0	0.0	0.0	0.0	0.0	1.0
A_32_P17525						None	None	None	None	None	None	None	None	None	None	None	nan	nan	nan	nan	nan	nan	nan	nan	nan
C20orf11	54994	gene_synonym	H. sapiens	54994	H. sapiens	GID8	GID complex subunit 8 homolog	GID8 is a human gene that encodes a protein involved in the positive regulation of the canonical Wnt signaling pathway and cell population proliferation. It is predicted to enable protein homodimerization activity and is located in the cell junction, cytosol, and nucleoplasm. GID8 is also part of a ubiquitin ligase complex.	There is limited information available on the disease implications of GID8. However, studies have shown that dysregulation of the Wnt signaling pathway, which GID8 is involved in, can lead to the development of various cancers, including colorectal cancer and hepatocellular carcinoma. Therefore, GID8 may have potential as a therapeutic target for these types of cancers. Currently, there are no dr…	GO:0090263 positive regulation of canonical Wnt signaling pathway;GO:0030177 positive regulation of Wnt signaling pathway;GO:0060828 regulation of canonical Wnt signaling pathway		Predicted intracellular proteins	Nucleoplasm (Supported); Additional: Cell Junctions				0.0	0.0	0.0	0.0	0.0	0.0	0.0	0.0	0.0
CXorf57	55086	gene_synonym	H. sapiens	55086	H. sapiens	RADX	RPA1 related single stranded DNA binding protein, X-linked	The human gene RADX is an X-linked gene that encodes for a protein that enables single-stranded DNA binding activity. It is involved in the negative regulation of double-strand break repair through homologous recombination and is located in the nuclear speck and replication fork. This information is provided by the Alliance of Genome Resources as of April 2022.	Unfortunately, there is currently limited information available on the disease implications and targeted drug discovery efforts for RADX. However, some studies have suggested that mutations in RADX may be associated with an increased risk of breast cancer. As for targeted drug discovery efforts, RADX's involvement in double-strand break repair through homologous recombination suggests that it may…	GO:2000042 negative regulation of double-strand break repair via homologous recombination;GO:2000780 negative regulation of double-strand break repair;GO:0045738 negative regulation of DNA repair		Predicted intracellular proteins	Nuclear speckles (Supported)				0.0	0.0	0.0	0.0	0.0	0.0	0.0	0.0	0.0
LINC00338	654434	gene_synonym	H. sapiens	654434	H. sapiens	SNHG20	small nucleolar RNA host gene 20										0.0	0.0	0.0	0.0	0.0	0.0	0.0	0.0	0.0
LCLAT1	253558	symbol	H. sapiens	253558	H. sapiens	LCLAT1	lysocardiolipin acyltransferase 1	LCLAT1, or lysocardiolipin acyltransferase 1, is a gene that encodes a protein involved in the activity of 1-acylglycerol-3-phosphate O-acyltransferase and phosphatidylinositol acyl-chain remodeling. The protein is located in both the cytosol and endoplasmic reticulum. This information is provided by the Alliance of Genome Resources as of April 2022.	There is limited information available on the disease implications of LCLAT1. However, recent studies have suggested that mutations in this gene may be associated with Barth syndrome, a rare genetic disorder that affects the heart, immune system, and skeletal muscles. Targeted drug discovery efforts for LCLAT1 are also limited, but some studies have suggested that inhibitors of 1-acylglycerol-3-p…	GO:0035965 cardiolipin acyl-chain remodeling;GO:0036149 phosphatidylinositol acyl-chain remodeling;GO:0016024 CDP-diacylglycerol biosynthetic process		Enzymes; ENZYME proteins:Transferases	Endoplasmic reticulum (Supported); Additional: Cytosol			(M5947)HALLMARK IL2 STAT5 SIGNALING	0.0	0.0	0.0	0.0	0.0	0.0	0.0	0.0	0.0
AQR	9716	symbol	H. sapiens	9716	H. sapiens	AQR	aquarius intron-binding spliceosomal factor	AQR is a human gene that encodes for the Aquarius intron-binding spliceosomal factor. This gene is involved in mRNA splicing through the spliceosome and is located in the nucleoplasm. AQR enables 3'-5' RNA helicase activity and single-stranded RNA binding activity, and is part of the U2-type catalytic step 2 spliceosome.	There is limited information available on the disease implications of AQR mutations. However, recent studies have suggested that AQR mutations may be associated with certain types of cancer, including breast and ovarian cancer. Targeted drug discovery efforts for AQR are still in the early stages, but there is potential for the development of drugs that target the spliceosome and RNA splicing pat…	GO:0140588 chromatin looping;GO:0000377 RNA splicing, via transesterification reactions with bulged adenosine as nucleophile;GO:0000398 mRNA splicing, via spliceosome		ENZYME proteins:Hydrolases; Enzymes; Predicted intracellular proteins	Nucleoplasm (Enhanced)				0.0	0.0	0.0	0.0	0.0	1.0	0.0	0.0	0.0
C17orf76	388341	gene_synonym	H. sapiens	388341	H. sapiens	LRRC75A	leucine rich repeat containing 75A	LRRC75A is a human gene that is predicted to be active in the cytoplasm. It is also known as leucine rich repeat containing 75A. The function of this gene is not yet fully understood, but it is believed to play a role in various cellular processes. LRRC75A is located on chromosome 1 and has been identified as a potential biomarker for certain types of cancer. Further research is needed to fully u…	There is limited information available on the disease implications and targeted drug discovery efforts for LRRC75A. However, some studies have suggested that this gene may be involved in the development and progression of certain types of cancer, including breast cancer and lung cancer. LRRC75A has been identified as a potential biomarker for these cancers, which could aid in early detection and …	GO:0043161 proteasome-mediated ubiquitin-dependent protein catabolic process;GO:0010498 proteasomal protein catabolic process;GO:0006511 ubiquitin-dependent protein catabolic process		Predicted intracellular proteins	Nucleoplasm (Approved); Additional: Cytosol;Nucleoli				0.0	0.0	0.0	0.0	0.0	0.0	0.0	0.0	0.0
APOOL	139322	symbol	H. sapiens	139322	H. sapiens	APOOL	apolipoprotein O like	The human gene APOOL encodes a protein that contains an apolipoprotein O superfamily domain. This domain is typically found on proteins in circulating lipoprotein complexes. The function of APOOL is not yet fully understood, but it is believed to play a role in lipid metabolism and transport. Mutations in this gene have been associated with various diseases, including dyslipidemia and atheroscler…	There is limited information available on the disease implications and targeted drug discovery efforts for APOOL. However, mutations in this gene have been associated with dyslipidemia and atherosclerosis, suggesting that it may be a potential target for drug development in these conditions. Currently, there are no drugs on the market that specifically target APOOL. However, there are several dru…	GO:0042407 cristae formation;GO:0007007 inner mitochondrial membrane organization;GO:0007006 mitochondrial membrane organization			Mitochondria (Enhanced)				0.0	0.0	0.0	0.0	0.0	0.0	0.0	0.0	0.0
A_24_P700210						None	None	None	None	None	None	None	None	None	None	None	nan	nan	nan	nan	nan	nan	nan	nan	nan
ALKBH5	54890	symbol	H. sapiens	54890	H. sapiens	ALKBH5	alkB homolog 5, RNA demethylase	ALKBH5 is a human gene that encodes for a protein called alkB homolog 5, which functions as an RNA demethylase. This protein is involved in various RNA-related processes, including mRNA export from the nucleus, response to hypoxia, and RNA metabolic processes. ALKBH5 is located in different parts of the cell, including the Golgi apparatus, cytosol, and nuclear speck. Its main function is to enabl…	Research on ALKBH5 is still in its early stages, and there is limited information on its disease implications and targeted drug discovery efforts. However, recent studies have suggested that dysregulation of ALKBH5 expression and activity may be associated with various types of cancer, including breast cancer, lung cancer, and glioblastoma. In addition, ALKBH5 has been implicated in neurological …	GO:0046630 gamma-delta T cell proliferation;GO:0010793 regulation of mRNA export from nucleus;GO:2000197 regulation of ribonucleoprotein complex localization		Enzymes; ENZYME proteins:Oxidoreductases; Predicted intracellular proteins	Cytosol;Nucleoplasm (Approved); Additional: Golgi apparatus				0.0	0.0	0.0	0.0	0.0	1.0	1.0	0.0	0.0
A_24_P401842						None	None	None	None	None	None	None	None	None	None	None	nan	nan	nan	nan	nan	nan	nan	nan	nan
NPNT	255743	symbol	H. sapiens	255743	H. sapiens	NPNT	nephronectin	NPNT, also known as nephronectin, is a gene that is predicted to enable integrin binding activity and be involved in several processes, including cell-cell adhesion mediated by integrin, positive regulation of ERK1 and ERK2 cascade, and positive regulation of osteoblast differentiation. It is also predicted to act upstream of or within positive regulation of transforming growth factor beta recept…	There is limited information available on the disease implications of NPNT. However, recent studies have suggested that NPNT may play a role in the development and progression of certain cancers, including breast cancer and glioblastoma. Targeted drug discovery efforts for NPNT are currently underway, with a focus on developing small molecule inhibitors that can block the activity of the protein.…	GO:0097195 pilomotor reflex;GO:0033631 cell-cell adhesion mediated by integrin;GO:0060004 reflex		Predicted secreted proteins; Predicted intracellular proteins	Cell Junctions;Cytosol;Nucleoplasm (Approved)		(M5887)NABA BASEMENT MEMBRANES; (M18)PID INTEGRIN1 PATHWAY; (M3008)NABA ECM GLYCOPROTEINS		0.0	0.0	1.0	0.0	0.0	0.0	0.0	0.0	0.0
SETX	23064	symbol	H. sapiens	23064	H. sapiens	SETX	senataxin	The human gene SETX, also known as senataxin, encodes a protein that contains a DNA/RNA helicase domain at its C-terminal end, indicating its potential involvement in both DNA and RNA processing. Mutations in this gene have been linked to ataxia-ocular apraxia-2 (AOA2) and an autosomal dominant form of juvenile amyotrophic lateral sclerosis (ALS4). The protein is named for its similarity to the S…	Mutations in the SETX gene have been linked to two neurological disorders: ataxia-ocular apraxia-2 (AOA2) and an autosomal dominant form of juvenile amyotrophic lateral sclerosis (ALS4). AOA2 is a rare autosomal recessive disorder characterized by progressive cerebellar ataxia, oculomotor apraxia, and peripheral neuropathy. ALS4 is a rare form of ALS that typically presents in early adulthood and…	GO:2000806 positive regulation of termination of RNA polymerase II transcription, poly(A)-coupled;GO:0060566 positive regulation of termination of DNA-templated transcription;GO:1904595 positive regulation of termination of RNA polymerase II transcription		Disease related genes; Human disease related genes:Nervous system diseases:Neurodegenerative diseases; Predicted intracellular proteins	Nucleoplasm (Supported); Additional: Cytokinetic bridge				1.0	0.0	0.0	1.0	0.0	1.0	0.0	0.0	0.0
HHIP	64399	symbol	H. sapiens	64399	H. sapiens	HHIP	hedgehog interacting protein	The HHIP gene encodes a protein that belongs to the hedgehog-interacting protein family. Hedgehog proteins are important for various developmental processes, including limb patterns and embryonic development. HHIP is a vertebrate-specific inhibitor of hedgehog signaling and interacts with all three hedgehog family members. Two single nucleotide polymorphisms (SNPs) near this gene are associated w…	The HHIP gene has been implicated in several diseases, including COPD, lung cancer, and osteoporosis. In COPD, two SNPs near the HHIP gene have been associated with increased risk of the disease. This has led to targeted drug discovery efforts aimed at inhibiting the HHIP protein to treat COPD. One example is the drug GSK2881078, which is a small molecule inhibitor of HHIP that has shown promise …	GO:0060441 epithelial tube branching involved in lung morphogenesis;GO:0045879 negative regulation of smoothened signaling pathway;GO:0040036 regulation of fibroblast growth factor receptor signaling pathway		Predicted secreted proteins	Nucleoplasm (Uncertain)		(M211)PID HEDGEHOG 2PATHWAY; (M5883)NABA SECRETED FACTORS; (M5885)NABA MATRISOME ASSOCIATED		1.0	0.0	0.0	0.0	0.0	0.0	0.0	0.0	0.0
RP11-291L15.2						None	None	None	None	None	None	None	None	None	None	None	nan	nan	nan	nan	nan	nan	nan	nan	nan
A_24_P365129						None	None	None	None	None	None	None	None	None	None	None	nan	nan	nan	nan	nan	nan	nan	nan	nan
RCAN1	1827	symbol	H. sapiens	1827	H. sapiens	RCAN1	regulator of calcineurin 1	RCAN1 is a human gene that encodes a protein that interacts with calcineurin A and inhibits calcineurin-dependent signaling pathways, which may affect the development of the central nervous system. The gene is located in the minimal candidate region for the Down syndrome phenotype and is overexpressed in the brain of Down syndrome fetuses. Chronic overexpression of RCAN1 may lead to the formation…	RCAN1 has been implicated in several diseases, including Down syndrome, Alzheimer's disease, and cancer. In Down syndrome, RCAN1 is overexpressed and may contribute to the cognitive deficits associated with the disorder. In Alzheimer's disease, chronic overexpression of RCAN1 may lead to the formation of neurofibrillary tangles, which are a hallmark of the disease. In cancer, RCAN1 has been shown…	GO:0031987 locomotion involved in locomotory behavior;GO:0007614 short-term memory;GO:0070885 negative regulation of calcineurin-NFAT signaling cascade		Human disease related genes:Other congenital disorders:Chromosomal abnormalities; Predicted intracellular proteins	Cytosol (Approved)	Dipyridamole	(M235)PID TCR CALCIUM PATHWAY; (M288)PID HES HEY PATHWAY; (M113)PID NFAT 3PATHWAY	(M5890)HALLMARK TNFA SIGNALING VIA NFKB	1.0	1.0	1.0	0.0	0.0	1.0	0.0	0.0	0.0
LRP12	29967	symbol	H. sapiens	29967	H. sapiens	LRP12	LDL receptor related protein 12	LRP12 is a gene that belongs to the low-density lipoprotein receptor related protein family. It encodes a transmembrane protein that is expressed differently in various cancer cells. The gene undergoes alternate splicing, resulting in the production of multiple transcript variants. The function of LRP12 is not yet fully understood, but it is believed to play a role in cell signaling and regulatio…	There is limited information available on the disease implications of LRP12. However, some studies have suggested that LRP12 may play a role in cancer development and progression. For example, LRP12 expression has been found to be upregulated in breast cancer and glioblastoma, and its overexpression has been associated with poor prognosis in these cancers. There are currently no targeted drug dis…	GO:0001764 neuron migration;GO:0006897 endocytosis;GO:0040008 regulation of growth		Disease related genes; Human disease related genes:Musculoskeletal diseases:Muscular diseases	Mitochondria;Nucleoli fibrillar center;Plasma membrane (Approved)				0.0	0.0	0.0	0.0	0.0	0.0	0.0	0.0	1.0
A_23_P395670						None	None	None	None	None	None	None	None	None	None	None	nan	nan	nan	nan	nan	nan	nan	nan	nan
PDLIM7	9260	symbol	H. sapiens	9260	H. sapiens	PDLIM7	PDZ and LIM domain 7	PDLIM7 is a human gene that encodes a protein with conserved PDZ and LIM domains. The LIM domains are believed to play a role in protein-protein recognition in various contexts, including gene transcription, development, and cytoskeletal interaction. The PDZ domain of the protein binds to actin filaments, while the LIM domains bind to protein kinases. The gene product is involved in the assembly …	There is limited information available on the disease implications of PDLIM7. However, recent studies have suggested that the gene may play a role in the development and progression of certain types of cancer, including breast cancer and hepatocellular carcinoma. Targeted drug discovery efforts for PDLIM7 are currently underway, with a focus on identifying small molecule inhibitors that can disru…	GO:0006898 receptor-mediated endocytosis;GO:0001503 ossification;GO:0006897 endocytosis		Predicted intracellular proteins	Actin filaments;Focal adhesion sites (Enhanced)		(M82)PID RET PATHWAY	(M5909)HALLMARK MYOGENESIS	0.0	1.0	1.0	0.0	0.0	0.0	0.0	0.0	1.0
TUBA1C	84790	symbol	H. sapiens	84790	H. sapiens	TUBA1C	tubulin alpha 1c	TUBA1C is a human gene that encodes for tubulin alpha 1c, a protein that is predicted to have GTP binding activity and be a structural component of the cytoskeleton. It is also predicted to play a role in the organization of the microtubule cytoskeleton and the mitotic cell cycle. TUBA1C is located in both the microtubule cytoskeleton and the nucleus.	Mutations in the TUBA1C gene have been associated with a range of neurological disorders, including lissencephaly, microcephaly, and intellectual disability. Additionally, TUBA1C has been implicated in the development and progression of various types of cancer, including breast cancer and lung cancer. As a result, there has been significant interest in developing drugs that target TUBA1C for the …	GO:0030705 cytoskeleton-dependent intracellular transport;GO:0051301 cell division;GO:0000226 microtubule cytoskeleton organization		Predicted intracellular proteins	Microtubules (Enhanced); Additional: Primary cilium	Epothilone D; Patupilone; CYT997; 2-MERCAPTO-N-[1,2,3,10-TETRAMETHOXY-9-OXO-5,6,7,9-TETRAHYDRO-BENZO[A]HEPTALEN-7-YL]ACETAMIDE			0.0	1.0	0.0	0.0	0.0	0.0	0.0	0.0	0.0
TMEM158	25907	symbol	H. sapiens	25907	H. sapiens	TMEM158	transmembrane protein 158	TMEM158 is a human gene that encodes for a transmembrane protein. The gene is upregulated in response to activation of the Ras pathway, which triggers an irreversible proliferation arrest similar to replicative senescence. The protein encoded by TMEM158 is similar to a rat cell surface receptor that is believed to function in a neuronal survival pathway. An allelic polymorphism in this gene resul…	There is limited information available on the disease implications of TMEM158. However, recent studies have suggested that the gene may play a role in the development and progression of certain types of cancer, including breast cancer and glioblastoma. Targeted drug discovery efforts for TMEM158 are currently underway, with a focus on identifying small molecule inhibitors that can selectively tar…							(M5953)HALLMARK KRAS SIGNALING UP	0.0	0.0	0.0	0.0	0.0	0.0	0.0	0.0	0.0
A_32_P11262						None	None	None	None	None	None	None	None	None	None	None	nan	nan	nan	nan	nan	nan	nan	nan	nan
CBLB	868	symbol	H. sapiens	868	H. sapiens	CBLB	Cbl proto-oncogene B	CBLB, also known as Cbl proto-oncogene B, is a gene that encodes an E3 ubiquitin-protein ligase. This protein promotes protein degradation by transferring ubiquitin from an E2 ubiquitin-conjugating enzyme to a substrate. CBLB is involved in regulating the immune response by limiting the activation of T-cell receptor, B-cell receptor, and high affinity immunoglobulin epsilon receptor. Studies in m…	There is growing interest in targeting CBLB for the treatment of various diseases, including cancer, autoimmune disorders, and infectious diseases. In cancer, CBLB has been shown to play a role in regulating immune evasion by tumor cells, and its inhibition can enhance anti-tumor immune responses. Several small molecule inhibitors of CBLB have been developed and are currently being evaluated in p…	GO:0002249 lymphocyte anergy;GO:0002870 T cell anergy;GO:0002669 positive regulation of T cell anergy		Cancer-related genes; Enzymes; Predicted intracellular proteins; ENZYME proteins:Transferases	Cytosol (Supported); Additional: Nucleoplasm		(M45)PID CD40 PATHWAY; (M214)PID ERBB1 INTERNALIZATION PATHWAY; (M60)PID NFAT TFPATHWAY	(M5921)HALLMARK COMPLEMENT	0.0	0.0	0.0	0.0	1.0	0.0	0.0	0.0	0.0

## Sheet: Enrichment
GroupID	Category	Term	Description	LogP	Log(q-value)	Genes	Symbols	InTerm_InList
1_Summary	KEGG Pathway	hsa04024	cAMP signaling pathway	-3.27456	0	2892,5501,9475,64399,1827,3084,23064	GRIA3,PPP1CC,ROCK2,HHIP,RCAN1,NRG1,SETX	7/-
1_Member	KEGG Pathway	hsa04024	cAMP signaling pathway	-3.27456	0	2892,5501,9475,64399	GRIA3,PPP1CC,ROCK2,HHIP	4/226
1_Member	WikiPathways	WP1544	MicroRNAs in cardiomyocyte hypertrophy	-3.16383	0	1827,3084,9475	RCAN1,NRG1,ROCK2	3/104
1_Member	KEGG Pathway	hsa04921	Oxytocin signaling pathway	-2.66538	0	1827,5501,9475	RCAN1,PPP1CC,ROCK2	3/155
1_Member	WikiPathways	WP3594	Circadian rhythm genes	-2.3479	0	5501,9475,23064	PPP1CC,ROCK2,SETX	3/201
2_Summary	GO Biological Processes	GO:0060485	mesenchyme development	-3.1237	0	3084,9475,56983,80031,1827,84790,9260,9648	NRG1,ROCK2,POGLUT1,SEMA6D,RCAN1,TUBA1C,PDLIM7,GCC2	8/-
2_Member	GO Biological Processes	GO:0060485	mesenchyme development	-3.1237	0	3084,9475,56983,80031	NRG1,ROCK2,POGLUT1,SEMA6D	4/248
2_Member	GO Biological Processes	GO:0048762	mesenchymal cell differentiation	-2.51632	0	3084,9475,80031	NRG1,ROCK2,SEMA6D	3/175
2_Member	WikiPathways	WP3888	VEGFA VEGFR2 signaling	-2.25137	0	1827,9475,80031,84790	RCAN1,ROCK2,SEMA6D,TUBA1C	4/432
2_Member	Reactome Gene Sets	R-HSA-422475	Axon guidance	-2.20308	0	9260,9475,80031,84790	PDLIM7,ROCK2,SEMA6D,TUBA1C	4/446
2_Member	Reactome Gene Sets	R-HSA-9675108	Nervous system development	-2.13384	0	9260,9475,80031,84790	PDLIM7,ROCK2,SEMA6D,TUBA1C	4/467
2_Member	KEGG Pathway	hsa05132	Salmonella infection	-2.08215	0	9475,9648,84790	ROCK2,GCC2,TUBA1C	3/251
3_Summary	GO Biological Processes	GO:0061061	muscle structure development	-2.75212	0	1827,3084,7026,9260,255743,56983	RCAN1,NRG1,NR2F2,PDLIM7,NPNT,POGLUT1	6/-
3_Member	GO Biological Processes	GO:0061061	muscle structure development	-2.75212	0	1827,3084,7026,9260,255743	RCAN1,NRG1,NR2F2,PDLIM7,NPNT	5/529
3_Member	GO Biological Processes	GO:0060537	muscle tissue development	-2.54909	0	1827,3084,7026,56983	RCAN1,NRG1,NR2F2,POGLUT1	4/356
4_Summary	GO Biological Processes	GO:0010976	positive regulation of neuron projection development	-2.58842	0	4076,23064,27067,5501,80031	CAPRIN1,SETX,STAU2,PPP1CC,SEMA6D	5/-
4_Member	GO Biological Processes	GO:0010976	positive regulation of neuron projection development	-2.58842	0	4076,23064,27067	CAPRIN1,SETX,STAU2	3/165
4_Member	GO Biological Processes	GO:0050767	regulation of neurogenesis	-2.48077	0	4076,5501,27067,80031	CAPRIN1,PPP1CC,STAU2,SEMA6D	4/372
4_Member	GO Biological Processes	GO:0010975	regulation of neuron projection development	-2.19633	0	4076,23064,27067,80031	CAPRIN1,SETX,STAU2,SEMA6D	4/448
4_Member	GO Biological Processes	GO:0051960	regulation of nervous system development	-2.17627	0	4076,5501,27067,80031	CAPRIN1,PPP1CC,STAU2,SEMA6D	4/454
4_Member	GO Biological Processes	GO:0050769	positive regulation of neurogenesis	-2.16541	0	4076,5501,27067	CAPRIN1,PPP1CC,STAU2	3/234
5_Summary	GO Biological Processes	GO:0072594	establishment of protein localization to organelle	-2.5145	0	868,9648,54492,503542	CBLB,GCC2,NEURL1B,SPRN	4/-
5_Member	GO Biological Processes	GO:0072594	establishment of protein localization to organelle	-2.5145	0	868,9648,54492,503542	CBLB,GCC2,NEURL1B,SPRN	4/364
6_Summary	GO Biological Processes	GO:0006979	response to oxidative stress	-2.46833	0	1827,23064,27067,54033,9716,54890	RCAN1,SETX,STAU2,RBM11,AQR,ALKBH5	6/-
6_Member	GO Biological Processes	GO:0006979	response to oxidative stress	-2.46833	0	1827,23064,27067,54033	RCAN1,SETX,STAU2,RBM11	4/375
6_Member	GO Biological Processes	GO:0034599	cellular response to oxidative stress	-2.20166	0	23064,27067,54033	SETX,STAU2,RBM11	3/227
6_Member	GO Biological Processes	GO:0006397	mRNA processing	-2.05599	0	9716,23064,54033,54890	AQR,SETX,RBM11,ALKBH5	4/492
7_Summary	GO Biological Processes	GO:1903311	regulation of mRNA metabolic process	-2.35358	0	4076,9475,54033,54890	CAPRIN1,ROCK2,RBM11,ALKBH5	4/-
7_Member	GO Biological Processes	GO:1903311	regulation of mRNA metabolic process	-2.35358	0	4076,9475,54033,54890	CAPRIN1,ROCK2,RBM11,ALKBH5	4/404
8_Summary	GO Biological Processes	GO:0048167	regulation of synaptic plasticity	-2.22293	0	2892,22986,27067	GRIA3,SORCS3,STAU2	3/-
8_Member	GO Biological Processes	GO:0048167	regulation of synaptic plasticity	-2.22293	0	2892,22986,27067	GRIA3,SORCS3,STAU2	3/223
9_Summary	GO Biological Processes	GO:0006897	endocytosis	-2.00856	0	9260,9522,29967,54492	PDLIM7,SCAMP1,LRP12,NEURL1B	4/-
9_Member	GO Biological Processes	GO:0006897	endocytosis	-2.00856	0	9260,9522,29967,54492	PDLIM7,SCAMP1,LRP12,NEURL1B	4/508
