# Supplementary material for: Deciphering developmental gradients in human hippocampus
Source: Research Square preprint supplement (doi:10.21203/rs.3.rs-8009443/v1), 2025-12-10
Supplement: Supplementary file 4 [file bebd50c5e2381bcb8fafe592.xlsx]

## Sheet: Annotation
MyList	Gene ID	Type	Tax ID	Homologene Gene ID	Homologene Gene Tax ID	Gene Symbol	Description	Protein Functions (ChatGPT)	Disease & Drugs (ChatGPT)	Biological Process (GO)	Kinase Class (UniProt)	Protein Function (Protein Atlas)	Subcellular Location (Protein Atlas)	Drug (DrugBank)	Canonical Pathways	Hallmark Gene Sets	GO:0050808 synapse organization	GO:0007420 brain development	GO:0031175 neuron projection development	GO:0099536 synaptic signaling	GO:0080135 regulation of cellular respons	GO:0072657 protein localization to membra	GO:1904951 positive regulation of establi	hsa04722 Neurotrophin signaling pathway	R-HSA-9012999 RHO GTPase cycle	hsa04144 Endocytosis	WP4829 mBDNF and proBDNF regulation o	GO:0001508 action potential	hsa04020 Calcium signaling pathway	GO:0007612 learning	hsa04066 HIF-1 signaling pathway	R-HSA-2029480 Fcgamma receptor (FCGR) depend	WP4549 Fragile X syndrome	GO:0030029 actin filament-based process	hsa04360 Axon guidance	WP5420 ADHD and autism ASD pathways
HPCA	3208	symbol	H. sapiens	3208	H. sapiens	HPCA	hippocalcin	HPCA, also known as hippocalcin, is a neuron-specific calcium-binding protein found in the retina and brain. It is associated with the plasma membrane and has similarities to proteins found in photoreceptor cells that regulate photosignal transduction in a calcium-sensitive manner. HPCA displays recoverin activity and a calcium-dependent inhibition of rhodopsin kinase. It is identical to the rat …	There is limited information available on the disease implications of HPCA. However, some studies have suggested that mutations in the HPCA gene may be associated with certain neurological disorders, such as schizophrenia and bipolar disorder. Targeted drug discovery efforts for HPCA are also limited, as its exact role in the central nervous system is not fully understood. However, some studies h…	GO:1901986 response to ketamine;GO:1904010 response to Aroclor 1254;GO:1905232 cellular response to L-glutamate		Human disease related genes:Nervous system diseases:Other nervous and sensory system diseases; Predicted intracellular proteins; Transporters:Accessory Factors Involved in Transport; Potential drug targets; Disease related genes					0.0	0.0	0.0	0.0	0.0	0.0	1.0	1.0	0.0	0.0	0.0	1.0	0.0	0.0	0.0	0.0	0.0	0.0	0.0	0.0
HUNK	30811	symbol	H. sapiens	30811	H. sapiens	HUNK	hormonally up-regulated Neu-associated kinase	HUNK, or hormonally up-regulated Neu-associated kinase, is a human gene that is predicted to have protein serine/threonine kinase activity and be involved in intracellular signal transduction and protein phosphorylation. This gene is up-regulated by hormones and is associated with the Neu receptor, which is involved in the development and progression of breast cancer. While the exact function of …	There is limited information available on the disease implications of HUNK, but it has been shown to be up-regulated in breast cancer and may play a role in the development and progression of this disease. Targeted drug discovery efforts for HUNK are currently underway, with the goal of developing drugs that can inhibit its activity and potentially treat breast cancer. However, there are currentl…	GO:0006338 chromatin remodeling;GO:0006325 chromatin organization;GO:0035556 intracellular signal transduction	yes	Enzymes; Predicted intracellular proteins; Kinases:CAMK Ser/Thr protein kinases; ENZYME proteins:Transferases	Nucleoplasm;Plasma membrane (Approved)				0.0	0.0	0.0	0.0	0.0	0.0	0.0	0.0	0.0	0.0	0.0	0.0	0.0	0.0	0.0	0.0	0.0	0.0	0.0	0.0
A_24_P349648						None	None	None	None	None	None	None	None	None	None	None	nan	nan	nan	nan	nan	nan	nan	nan	nan	nan	nan	nan	nan	nan	nan	nan	nan	nan	nan	nan
A_24_P349590						None	None	None	None	None	None	None	None	None	None	None	nan	nan	nan	nan	nan	nan	nan	nan	nan	nan	nan	nan	nan	nan	nan	nan	nan	nan	nan	nan
DLG4	1742	symbol	H. sapiens	1742	H. sapiens	DLG4	discs large MAGUK scaffold protein 4	DLG4, also known as discs large MAGUK scaffold protein 4, is a gene that encodes a protein belonging to the membrane-associated guanylate kinase (MAGUK) family. This protein interacts with another MAGUK protein, DLG2, and is involved in the clustering of receptors, ion channels, and signaling proteins at postsynaptic sites. DLG4 is recruited into NMDA receptor and potassium channel clusters, wher…	DLG4 has been implicated in various neurological disorders, including schizophrenia and autism spectrum disorders. In schizophrenia, genetic studies have identified DLG4 as a susceptibility gene, and postmortem studies have shown reduced levels of DLG4 protein in the prefrontal cortex of patients. DLG4 has also been linked to the pathogenesis of autism spectrum disorders, with mutations in the ge…	GO:2000821 regulation of grooming behavior;GO:0097113 AMPA glutamate receptor clustering;GO:0097688 glutamate receptor clustering	yes	Predicted intracellular proteins; Human disease related genes:Other diseases:Mental and behavioural disorders; Transporters:Accessory Factors Involved in Transport; Potential drug targets; Disease related genes		Guanidine; Guanosine-5'-Monophosphate	(M13)PID ERBB4 PATHWAY	(M5949)HALLMARK PEROXISOME; (M5941)HALLMARK UV RESPONSE UP	1.0	0.0	1.0	1.0	0.0	1.0	0.0	1.0	1.0	0.0	1.0	1.0	0.0	1.0	0.0	0.0	1.0	0.0	1.0	1.0
A_24_P889103						None	None	None	None	None	None	None	None	None	None	None	nan	nan	nan	nan	nan	nan	nan	nan	nan	nan	nan	nan	nan	nan	nan	nan	nan	nan	nan	nan
SEC14L1	6397	symbol	H. sapiens	6397	H. sapiens	SEC14L1	SEC14 like lipid binding 1	SEC14L1 is a human gene that belongs to the SEC14 cytosolic factor family. It shares similarities with yeast SEC14 and Japanese flying squid RALBP, indicating a potential role in intracellular transport. The gene has multiple alternatively spliced transcript variants, some of which include exons from the upstream gene C17orf86.	There is limited information available on the disease implications of SEC14L1. However, recent studies have suggested that the gene may play a role in cancer progression and metastasis. Specifically, SEC14L1 has been found to be upregulated in several types of cancer, including breast, lung, and pancreatic cancer. Targeted drug discovery efforts for SEC14L1 are still in the early stages, but ther…	GO:0039536 negative regulation of RIG-I signaling pathway;GO:0015871 choline transport;GO:0039535 regulation of RIG-I signaling pathway		Predicted intracellular proteins; Transporters	Cytosol;Nucleoplasm (Supported)			(M5945)HALLMARK HEME METABOLISM	0.0	0.0	0.0	0.0	0.0	0.0	0.0	0.0	0.0	0.0	0.0	0.0	0.0	0.0	0.0	0.0	0.0	0.0	0.0	0.0
CELF3	11189	symbol	H. sapiens	11189	H. sapiens	CELF3	CUGBP Elav-like family member 3	CELF3 is a human gene that belongs to the CUGBP Elav-like family of proteins. These proteins contain RNA recognition motif (RRM) domains and are involved in regulating pre-mRNA alternative splicing, mRNA editing, and translation. CELF3 has multiple alternatively spliced transcript variants that encode different isoforms. The protein is thought to play a role in the development of the nervous syst…	There is limited information available on the disease implications of CELF3. However, some studies have suggested that alterations in CELF3 expression or function may be associated with neurological disorders such as autism spectrum disorder and schizophrenia. Targeted drug discovery efforts for CELF3 are also limited, as the exact role of the protein in disease pathogenesis is not well understoo…	GO:0140742 lncRNA transcription;GO:0030575 nuclear body organization;GO:0048026 positive regulation of mRNA splicing, via spliceosome		Predicted intracellular proteins	Nucleoplasm (Approved)				0.0	0.0	0.0	0.0	0.0	0.0	0.0	0.0	0.0	0.0	0.0	0.0	0.0	0.0	0.0	0.0	0.0	0.0	0.0	0.0
ANP32D	23519	symbol	H. sapiens	23519	H. sapiens	ANP32D	acidic nuclear phosphoprotein 32 family member D	ANP32D is a gene that belongs to the acidic nuclear phosphoprotein 32 family and encodes a protein that is similar in amino acid sequence to the tumor suppressor protein PP32. However, unlike PP32, the protein encoded by ANP32D is tumorigenic and can promote the growth of several types of cancers, including prostate and breast cancers. The tumor suppressor function of PP32 has been localized to a…	ANP32D has been implicated in several types of cancers, including prostate and breast cancers. Studies have shown that ANP32D promotes cancer cell proliferation and survival by inhibiting apoptosis and enhancing cell cycle progression. Therefore, ANP32D has been identified as a potential therapeutic target for cancer treatment. Several drug discovery efforts have been made to develop small molecu…			Predicted intracellular proteins	Nucleoplasm (Approved); Additional: Centrosome				0.0	0.0	0.0	0.0	0.0	0.0	0.0	0.0	0.0	0.0	0.0	0.0	0.0	0.0	0.0	0.0	0.0	0.0	0.0	0.0
A_24_P911553						None	None	None	None	None	None	None	None	None	None	None	nan	nan	nan	nan	nan	nan	nan	nan	nan	nan	nan	nan	nan	nan	nan	nan	nan	nan	nan	nan
BCR	613	symbol	H. sapiens	613	H. sapiens	BCR	BCR activator of RhoGEF and GTPase	The BCR gene is involved in a reciprocal translocation between chromosomes 22 and 9 that produces the Philadelphia chromosome, which is often found in patients with chronic myelogenous leukemia. The BCR gene is located at the chromosome 22 breakpoint for this translocation. The translocation produces a fusion protein encoded by both BCR and ABL genes. The function of the normal BCR gene product i…	The BCR-ABL1 fusion protein resulting from the translocation of the BCR gene is a key driver of chronic myelogenous leukemia (CML) and some cases of acute lymphoblastic leukemia (ALL). Targeted drug discovery efforts have focused on developing small molecule inhibitors that specifically target the tyrosine kinase activity of BCR-ABL1. The first successful drug in this class was imatinib, which wa…	GO:0043314 negative regulation of neutrophil degranulation;GO:0060313 negative regulation of blood vessel remodeling;GO:0043312 neutrophil degranulation	yes	Human disease related genes:Cancers:Cancers of haematopoietic and lymphoid tissues; Predicted intracellular proteins; Cancer-related genes; ENZYME proteins:Transferases; FDA approved drug targets:Small molecule drugs; Disease related genes; Enzymes	Cytosol;Plasma membrane (Approved); Additional: Nucleoplasm	Imatinib; Dasatinib; Bosutinib; Ponatinib	(M17200)SA B CELL RECEPTOR COMPLEXES; (M1315)SIG PIP3 SIGNALING IN B LYMPHOCYTES; (M241)PID RAC1 REG PATHWAY	(M5893)HALLMARK MITOTIC SPINDLE	1.0	1.0	0.0	1.0	0.0	0.0	1.0	1.0	0.0	0.0	0.0	0.0	0.0	0.0	0.0	0.0	0.0	1.0	0.0	0.0
ARHGAP21	57584	symbol	H. sapiens	57584	H. sapiens	ARHGAP21	Rho GTPase activating protein 21	ARHGAP21 is a human gene that encodes for a protein called Rho GTPase activating protein 21. This protein functions as a GTPase-activating protein (GAP) for CDC42, a protein involved in cell signaling and cytoskeletal organization. ARHGAP21 regulates the ARP2/3 complex and F-actin dynamics at the Golgi by controlling the activity of CDC42. This gene is important for the proper functioning of cell…	Mutations in ARHGAP21 have been associated with various diseases, including cancer and developmental disorders. In particular, ARHGAP21 has been found to be downregulated in several types of cancer, including breast, lung, and ovarian cancer. This suggests that ARHGAP21 may function as a tumor suppressor gene. Targeted drug discovery efforts for ARHGAP21 are currently underway, with a focus on de…	GO:0051684 maintenance of Golgi location;GO:0051683 establishment of Golgi localization;GO:0051657 maintenance of organelle location		Predicted intracellular proteins	Cell Junctions;Plasma membrane (Approved); Additional: Actin filaments				0.0	0.0	0.0	0.0	0.0	0.0	0.0	0.0	1.0	0.0	0.0	0.0	0.0	0.0	0.0	0.0	0.0	0.0	0.0	0.0
MALAT1	378938	symbol	H. sapiens	378938	H. sapiens	MALAT1	metastasis associated lung adenocarcinoma transcript 1			GO:0110024 positive regulation of cardiac muscle myoblast proliferation;GO:0110022 regulation of cardiac muscle myoblast proliferation;GO:2000627 positive regulation of miRNA catabolic process							0.0	0.0	0.0	0.0	0.0	0.0	0.0	0.0	0.0	0.0	0.0	0.0	0.0	0.0	0.0	0.0	0.0	0.0	0.0	0.0
CAMK2B	816	symbol	H. sapiens	816	H. sapiens	CAMK2B	calcium/calmodulin dependent protein kinase II beta	CAMK2B is a gene that encodes for the beta chain of the Ca(2+)/calmodulin-dependent protein kinase II subfamily, which belongs to the serine/threonine protein kinase family. This gene is involved in calcium signaling, which is important for plasticity at glutamatergic synapses. The enzyme is composed of four different chains, and the beta chain may have different cellular localizations and intera…	CAMK2B has been implicated in various diseases, including neurodegenerative disorders such as Alzheimer's disease and Parkinson's disease, as well as cardiovascular diseases such as heart failure and arrhythmias. In Alzheimer's disease, CAMK2B has been shown to be involved in the formation of amyloid plaques and tau protein phosphorylation, which are hallmarks of the disease. In heart failure, CA…	GO:0090129 positive regulation of synapse maturation;GO:0051823 regulation of synapse structural plasticity;GO:0014733 regulation of skeletal muscle adaptation	yes	Predicted intracellular proteins; Human disease related genes:Other diseases:Mental and behavioural disorders; ENZYME proteins:Transferases; Potential drug targets; Kinases:CAMK Ser/Thr protein kinases; Disease related genes; Enzymes	Plasma membrane;Primary cilium tip;Primary cilium transition zone;Principal piece (Approved); Additional: Calyx;Cell Junctions;Connecting piece;End piece;Perinuclear theca	[4-({4-[(5-cyclopropyl-1H-pyrazol-3-yl)amino]-6-(methylamino)pyrimidin-2-yl}amino)phenyl]acetonitrile; Fostamatinib	(M20)PID P38 MKK3 6PATHWAY; (M269)PID RAS PATHWAY; (M161)PID IFNG PATHWAY	(M5909)HALLMARK MYOGENESIS	0.0	0.0	1.0	1.0	0.0	0.0	0.0	1.0	0.0	0.0	0.0	1.0	1.0	0.0	1.0	0.0	1.0	0.0	1.0	0.0
CHRFAM7A	89832	symbol	H. sapiens	89832	H. sapiens	CHRFAM7A	CHRNA7 (exons 5-10) and FAM7A (exons A-E) fusion	CHRFAM7A is a human gene that is a fusion of CHRNA7 and FAM7A. CHRNA7 is a member of the nicotinic acetylcholine receptor family and is located on chromosome 15 in a region associated with several neuropsychiatric disorders. The fusion with FAM7A results in two variants of the hybrid gene due to alternative splicing. The predicted products of the largest open reading frames for each variant lack …	The CHRFAM7A gene has been implicated in several neuropsychiatric disorders, including schizophrenia, bipolar disorder, and autism spectrum disorder. However, the exact role of this gene in these disorders is not yet fully understood. Targeted drug discovery efforts for CHRFAM7A have been limited due to the lack of knowledge about the function of the gene and its protein products. Currently, ther…	GO:0001982 baroreceptor response to decreased systemic arterial blood pressure;GO:0001988 positive regulation of heart rate involved in baroreceptor response to decreased systemic arterial blood pressure;GO:0001978 regulation of systemic arterial blood pressure by carotid sinus baroreceptor feedback		Predicted intracellular proteins		Choline; Nicotine; Butalbital; Talbutal; Pentobarbital; Methadone; Secobarbital; Metharbital; Dextromethorphan; Thiopental; Mecamylamine; Galantamine; Primidone; Methylphenobarbital; Ethanol; Amantadine; Phenobarbital; Tubocurarine; Varenicline; Amobarbital; Aprobarbital; Butobarbital; Heptabarbital; Hexobarbital; Barbital; Dihydro-2-thioxo-5-((5-(2-(trifluoromethyl)phenyl)-2-furanyl)methyl)-4,6(…			1.0	0.0	1.0	1.0	0.0	0.0	1.0	0.0	0.0	0.0	1.0	1.0	1.0	1.0	0.0	0.0	0.0	0.0	0.0	0.0
CPLX2	10814	symbol	H. sapiens	10814	H. sapiens	CPLX2	complexin 2	CPLX2, also known as complexin 2, is a gene that encodes for a cytosolic protein involved in synaptic vesicle exocytosis. The protein product of this gene binds to the SNAP receptor complex and disrupts it, allowing for the release of neurotransmitters. This gene belongs to the complexin/synaphin gene family and has two transcript variants that encode the same protein. The function of CPLX2 is im…	Disruptions in CPLX2 expression or function have been linked to several neurological disorders, including epilepsy and schizophrenia. In epilepsy, studies have shown that CPLX2 expression is decreased in the hippocampus, a region of the brain important for memory and learning, in patients with temporal lobe epilepsy. In schizophrenia, genetic studies have identified variations in the CPLX2 gene t…	GO:0031915 positive regulation of synaptic plasticity;GO:0031630 regulation of synaptic vesicle fusion to presynaptic active zone membrane;GO:1901632 regulation of synaptic vesicle membrane organization		Predicted intracellular proteins	Vesicles (Uncertain)				0.0	0.0	0.0	1.0	0.0	0.0	1.0	0.0	0.0	0.0	0.0	0.0	0.0	0.0	0.0	0.0	0.0	0.0	0.0	0.0
PRR20	122183	gene_synonym	H. sapiens	122183	H. sapiens	PRR20A	proline rich 20A	PRR20A is a gene located on chromosome 13q21.1 and is one of five identical loci in a cluster. The protein encoded by this gene is proline-rich and contains several dopamine D4 receptor signatures and PRINTS domains. The function of this gene is not yet fully understood, but it is believed to play a role in dopamine signaling pathways.	There is limited information available on the disease implications of PRR20A. However, studies have suggested that variations in this gene may be associated with an increased risk of developing schizophrenia. Targeted drug discovery efforts for PRR20A are also limited, as the function of the gene is not yet fully understood. However, drugs targeting dopamine signaling pathways, which PRR20A is be…			Predicted intracellular proteins					0.0	0.0	0.0	0.0	0.0	0.0	0.0	0.0	0.0	0.0	0.0	0.0	0.0	0.0	0.0	0.0	0.0	0.0	0.0	0.0
BHLHE22	27319	symbol	H. sapiens	27319	H. sapiens	BHLHE22	basic helix-loop-helix family member e22	BHLHE22 is a gene that encodes a protein belonging to the basic helix-loop-helix (bHLH) family of transcription factors. These factors regulate cell fate determination, proliferation, and differentiation. In mice, a similar protein is required for the development of the dorsal cochlear nuclei and is thought to play a role in the differentiation of neurons involved in sensory input. The mouse prot…	There is limited information available on the disease implications of BHLHE22. However, recent studies have suggested that mutations in this gene may be associated with certain types of cancer, including breast cancer and hepatocellular carcinoma. Targeted drug discovery efforts for BHLHE22 are still in the early stages, but there is potential for this gene to be targeted in cancer therapy. One e…	GO:0061564 axon development;GO:0007423 sensory organ development;GO:0031175 neuron projection development		Transcription factors:Basic domains; Predicted intracellular proteins	Nuclear speckles;Nucleoplasm (Approved); Additional: Centrosome;Cytosol				0.0	0.0	1.0	0.0	0.0	0.0	0.0	0.0	0.0	0.0	0.0	0.0	0.0	0.0	0.0	0.0	0.0	0.0	0.0	0.0
A_23_P28582						None	None	None	None	None	None	None	None	None	None	None	nan	nan	nan	nan	nan	nan	nan	nan	nan	nan	nan	nan	nan	nan	nan	nan	nan	nan	nan	nan
PIK3R2	5296	symbol	H. sapiens	5296	H. sapiens	PIK3R2	phosphoinositide-3-kinase regulatory subunit 2	PIK3R2 is a human gene that encodes a regulatory subunit of the phosphatidylinositol 3-kinase (PI3K) enzyme. PI3K is responsible for phosphorylating phosphatidylinositol and similar compounds, which creates second messengers that are important in growth signaling pathways. The PIK3R2 protein functions as a heterodimer with a catalytic subunit of PI3K. This gene has three transcript variants, one …	Mutations in the PIK3R2 gene have been implicated in various diseases, including cancer, developmental disorders, and immune system dysfunction. In cancer, PIK3R2 mutations have been found in several types of tumors, including breast, ovarian, and lung cancer. Targeted drug discovery efforts have focused on developing inhibitors of the PI3K pathway, including PI3K inhibitors, AKT inhibitors, and …	GO:0042307 positive regulation of protein import into nucleus;GO:0042306 regulation of protein import into nucleus;GO:0046824 positive regulation of nucleocytoplasmic transport		Predicted intracellular proteins; Cancer-related genes:Candidate cancer biomarkers; Human disease related genes:Congenital malformations:Other congenital malformations; Disease related genes; RAS pathway related proteins	Golgi apparatus (Approved)	Isoprenaline; SF1126	(M79)PID TRAIL PATHWAY; (M193)PID NEPHRIN NEPH1 PATHWAY; (M127)PID ERBB1 RECEPTOR PROXIMAL PATHWAY		0.0	0.0	0.0	0.0	0.0	0.0	1.0	1.0	1.0	0.0	1.0	0.0	1.0	0.0	1.0	1.0	1.0	0.0	1.0	1.0
A_32_P200490						None	None	None	None	None	None	None	None	None	None	None	nan	nan	nan	nan	nan	nan	nan	nan	nan	nan	nan	nan	nan	nan	nan	nan	nan	nan	nan	nan
WDR20	91833	symbol	H. sapiens	91833	H. sapiens	WDR20	WD repeat domain 20	The human gene WDR20 encodes a protein that contains WD repeats and plays a role in preserving and regulating the activity of the USP12-UAF1 deubiquitinating enzyme complex. This gene has multiple alternatively spliced transcript variants.	There is limited information available on the disease implications of WDR20. However, recent studies have suggested that dysregulation of the USP12-UAF1 complex, which is regulated by WDR20, may be involved in the development of certain cancers, including breast and lung cancer. Targeted drug discovery efforts for WDR20 are currently limited, but there is potential for the development of drugs th…			Predicted intracellular proteins					0.0	0.0	0.0	0.0	0.0	0.0	0.0	0.0	0.0	0.0	0.0	0.0	0.0	0.0	0.0	0.0	0.0	0.0	0.0	0.0
A_24_P66908						None	None	None	None	None	None	None	None	None	None	None	nan	nan	nan	nan	nan	nan	nan	nan	nan	nan	nan	nan	nan	nan	nan	nan	nan	nan	nan	nan
TEX2	55852	symbol	H. sapiens	55852	H. sapiens	TEX2	testis expressed 2	TEX2, or testis expressed 2, is a gene that is predicted to be involved in lipid transport and to have lipid binding activity. It is also predicted to be located in the endoplasmic reticulum membrane and nuclear membrane, and to be an integral component of the membrane. The gene is predicted to be active in the endoplasmic reticulum. This information is provided by the Alliance of Genome Resource…	There is limited information available on the disease implications of TEX2. However, some studies have suggested that TEX2 may play a role in the development and progression of certain types of cancer, including prostate cancer and breast cancer. Targeted drug discovery efforts for TEX2 are also limited, as the function of the gene is not well understood. However, some studies have suggested that…	GO:0006665 sphingolipid metabolic process;GO:0006643 membrane lipid metabolic process;GO:0006869 lipid transport		Predicted intracellular proteins	Nucleoplasm (Approved)				0.0	0.0	0.0	0.0	0.0	0.0	0.0	0.0	1.0	0.0	0.0	0.0	0.0	0.0	0.0	0.0	0.0	0.0	0.0	0.0
A_24_P673209						None	None	None	None	None	None	None	None	None	None	None	nan	nan	nan	nan	nan	nan	nan	nan	nan	nan	nan	nan	nan	nan	nan	nan	nan	nan	nan	nan
ZNF721	170960	symbol	H. sapiens	170960	H. sapiens	ZNF721	zinc finger protein 721	ZNF721 is a human gene that encodes for a zinc finger protein 721. This protein is predicted to have DNA-binding transcription activator activity, specifically for RNA polymerase II and cis-regulatory region sequence-specific DNA binding activity. It is also predicted to be involved in the regulation of transcription by RNA polymerase II and to be active in the nucleus.	There is limited information available on the disease implications of ZNF721. However, some studies have suggested that it may play a role in the development of certain cancers, including breast cancer and glioblastoma. Targeted drug discovery efforts for ZNF721 are also limited, as the function of this gene is not well understood. Currently, there are no drugs on the market that specifically tar…	GO:0045944 positive regulation of transcription by RNA polymerase II;GO:0045893 positive regulation of DNA-templated transcription;GO:1902680 positive regulation of RNA biosynthetic process		Transcription factors:Zinc-coordinating DNA-binding domains; Predicted intracellular proteins	Cytosol (Approved); Additional: Centriolar satellite				0.0	0.0	0.0	0.0	0.0	0.0	0.0	0.0	0.0	0.0	0.0	0.0	0.0	0.0	0.0	0.0	0.0	0.0	0.0	0.0
ZNF83	55769	symbol	H. sapiens	55769	H. sapiens	ZNF83	zinc finger protein 83	ZNF83 is a human gene that encodes for a protein called zinc finger protein 83. This protein is predicted to have the ability to bind to DNA and regulate transcription by RNA polymerase II, a key enzyme involved in gene expression. ZNF83 is also predicted to be located in the nucleus, where it may play a role in regulating gene expression. Overall, ZNF83 is an important gene that may have implica…	There is limited information available on the disease implications of ZNF83. However, some studies have suggested that mutations in this gene may be associated with certain types of cancer, such as breast cancer and lung cancer. As for targeted drug discovery efforts, there are currently no drugs on the market that specifically target ZNF83. However, there are ongoing efforts to develop drugs tha…	GO:0006357 regulation of transcription by RNA polymerase II;GO:0006355 regulation of DNA-templated transcription;GO:2001141 regulation of RNA biosynthetic process		Transcription factors:Zinc-coordinating DNA-binding domains; Predicted intracellular proteins	Nucleoplasm (Approved)				0.0	0.0	0.0	0.0	0.0	0.0	0.0	0.0	0.0	0.0	0.0	0.0	0.0	0.0	0.0	0.0	0.0	0.0	0.0	0.0
ACTR2	10097	symbol	H. sapiens	10097	H. sapiens	ACTR2	actin related protein 2	ACTR2 is a human gene that encodes a protein that is a major component of the ARP2/3 complex. The specific function of this gene is not yet known, but the ARP2/3 complex is essential for cell shape and motility through the assembly and protrusion of lamellipodial actin. Two different isoforms of the protein have been identified through transcript variants.	Mutations in the ACTR2 gene have been associated with several diseases, including Baraitser-Winter syndrome, a rare genetic disorder characterized by intellectual disability, epilepsy, and distinctive facial features. Additionally, ACTR2 mutations have been linked to a form of hereditary spastic paraplegia, a group of neurological disorders that affect the ability to walk. Targeted drug discovery…	GO:0016344 meiotic chromosome movement towards spindle pole;GO:0051305 chromosome movement towards spindle pole;GO:0033206 meiotic cytokinesis		Predicted intracellular proteins	Cytosol (Uncertain); Additional: Nucleoli	N-[2-(2-methyl-1H-indol-3-yl)ethyl]thiophene-2-carboxamide; (2S)-2-(3-bromophenyl)-3-(5-chloro-2-hydroxyphenyl)-1,3-thiazolidin-4-one	(M16801)SIG REGULATION OF THE ACTIN CYTOSKELETON BY RHO GTPASES; (M5193)SIG CHEMOTAXIS; (M278)PID RAC1 PATHWAY	(M5923)HALLMARK PI3K AKT MTOR SIGNALING; (M5924)HALLMARK MTORC1 SIGNALING	0.0	0.0	1.0	0.0	1.0	0.0	0.0	1.0	1.0	1.0	0.0	0.0	0.0	0.0	0.0	1.0	0.0	1.0	1.0	0.0
A_24_P943723						None	None	None	None	None	None	None	None	None	None	None	nan	nan	nan	nan	nan	nan	nan	nan	nan	nan	nan	nan	nan	nan	nan	nan	nan	nan	nan	nan
RFPL3S	10737	symbol	H. sapiens	10737	H. sapiens	RFPL3S	RFPL3 antisense										0.0	0.0	0.0	0.0	0.0	0.0	0.0	0.0	0.0	0.0	0.0	0.0	0.0	0.0	0.0	0.0	0.0	0.0	0.0	0.0
A_24_P33785						None	None	None	None	None	None	None	None	None	None	None	nan	nan	nan	nan	nan	nan	nan	nan	nan	nan	nan	nan	nan	nan	nan	nan	nan	nan	nan	nan
PRCC	5546	symbol	H. sapiens	5546	H. sapiens	PRCC	proline rich mitotic checkpoint control factor	The PRCC gene encodes a protein that may be involved in pre-mRNA splicing. Chromosomal translocations that fuse PRCC with TFE3 have been linked to papillary renal cell carcinoma. The resulting PRCC-TFE3 fusion protein is expressed in affected carcinomas and is believed to alter gene transactivation and disrupt the cell cycle.	Papillary renal cell carcinoma (PRCC) is a type of kidney cancer that is associated with chromosomal translocations involving the PRCC gene. The resulting fusion proteins, such as PRCC-TFE3, are believed to play a role in the development and progression of the disease. Targeted drug discovery efforts have focused on developing inhibitors of the fusion proteins, as well as other proteins involved …	GO:0051726 regulation of cell cycle;GO:0050794 regulation of cellular process;GO:0050789 regulation of biological process		Disease related genes; Cancer-related genes; Human disease related genes:Cancers:Cancers of the urinary system; Predicted intracellular proteins	Nuclear speckles (Enhanced)				0.0	0.0	0.0	0.0	0.0	0.0	0.0	1.0	0.0	0.0	0.0	0.0	0.0	0.0	0.0	0.0	0.0	0.0	0.0	0.0
KCTD13	253980	symbol	H. sapiens	253980	H. sapiens	KCTD13	potassium channel tetramerization domain containing 13	KCTD13 is a human gene that encodes a protein called potassium channel tetramerization domain containing 13. This protein is involved in various cellular processes, including protein metabolism, regulation of Rho protein signal transduction, and stress fiber assembly. It is located in the nuclear body and is part of the Cul3-RING ubiquitin ligase complex. KCTD13 enables identical protein binding …	There is limited information available on the disease implications of KCTD13. However, recent studies have suggested that mutations in this gene may be associated with intellectual disability and autism spectrum disorders. Targeted drug discovery efforts for KCTD13 are also limited, as the exact role of this protein in disease pathogenesis is not well understood. However, some studies have sugges…	GO:0030038 contractile actin filament bundle assembly;GO:0043149 stress fiber assembly;GO:0035024 negative regulation of Rho protein signal transduction		Disease related genes; Predicted intracellular proteins	Nuclear bodies;Nucleoplasm (Supported)				0.0	0.0	0.0	1.0	1.0	0.0	0.0	0.0	1.0	0.0	0.0	0.0	0.0	0.0	0.0	0.0	0.0	1.0	0.0	0.0
A_24_P358474						None	None	None	None	None	None	None	None	None	None	None	nan	nan	nan	nan	nan	nan	nan	nan	nan	nan	nan	nan	nan	nan	nan	nan	nan	nan	nan	nan
FGFR4	2264	symbol	H. sapiens	2264	H. sapiens	FGFR4	fibroblast growth factor receptor 4	FGFR4 is a human gene that encodes a protein called fibroblast growth factor receptor 4. This protein is a cell surface receptor and tyrosine kinase that plays a role in regulating various cellular pathways, including cell proliferation, differentiation, migration, lipid metabolism, bile acid biosynthesis, vitamin D metabolism, glucose uptake, and phosphate homeostasis. The protein is composed of…	FGFR4 has been implicated in various diseases, including cancer, liver disease, and metabolic disorders. In cancer, FGFR4 overexpression has been observed in several types of tumors, including breast, lung, and liver cancer, and is associated with poor prognosis. As a result, FGFR4 has become a target for cancer therapy, and several drugs that inhibit FGFR4 activity are currently in clinical tria…	GO:0070857 regulation of bile acid biosynthetic process;GO:1904251 regulation of bile acid metabolic process;GO:0010715 regulation of extracellular matrix disassembly	yes	Kinases:Tyr protein kinases; RAS pathway related proteins; Predicted intracellular proteins; ENZYME proteins:Transferases; Transporters:Accessory Factors Involved in Transport; FDA approved drug targets:Small molecule drugs; Disease related genes; CD markers; Enzymes; Cancer-related genes:Candidate cancer biomarkers		Palifermin; Heparin; Ponatinib; Lenvatinib; Erdafitinib; Pemigatinib	(M276)PID FGF PATHWAY		0.0	0.0	0.0	0.0	1.0	0.0	0.0	1.0	0.0	1.0	0.0	0.0	1.0	0.0	0.0	0.0	0.0	0.0	0.0	0.0
ARFGAP2	84364	symbol	H. sapiens	84364	H. sapiens	ARFGAP2	ARF GTPase activating protein 2	ARFGAP2 is a human gene that encodes for a protein called ADP ribosylation factor GTPase activating protein 2. This protein is predicted to have GTPase activator activity and is involved in the COPI coating of Golgi vesicles. ARFGAP2 is located in the Golgi apparatus, cytosol, and plasma membrane. This information is provided by the Alliance of Genome Resources as of April 2022.	There is limited information available on the disease implications of ARFGAP2. However, some studies have suggested that mutations in this gene may be associated with certain types of cancer, including breast cancer and hepatocellular carcinoma. Targeted drug discovery efforts for ARFGAP2 are also limited, but some studies have explored the potential of small molecule inhibitors of ARFGAP2 as a t…	GO:0035964 COPI-coated vesicle budding;GO:0048200 Golgi transport vesicle coating;GO:0048205 COPI coating of Golgi vesicle		Predicted intracellular proteins	Golgi apparatus (Supported)				0.0	0.0	0.0	0.0	0.0	0.0	0.0	0.0	1.0	1.0	0.0	0.0	0.0	0.0	0.0	0.0	0.0	0.0	0.0	0.0
PMS2P1	5379	symbol	H. sapiens	5379	H. sapiens	PMS2P1	PMS1 homolog 2, mismatch repair system component pseudogene 1			GO:0006298 mismatch repair;GO:0006281 DNA repair;GO:0006259 DNA metabolic process							0.0	0.0	0.0	0.0	0.0	0.0	0.0	0.0	0.0	0.0	0.0	0.0	0.0	0.0	0.0	0.0	0.0	0.0	0.0	0.0
CDK5R1	8851	symbol	H. sapiens	8851	H. sapiens	CDK5R1	cyclin dependent kinase 5 regulatory subunit 1	CDK5R1 is a gene that encodes a protein called p35, which is essential for the proper development of the central nervous system. P35 activates cyclin-dependent kinase 5 (CDK5), a protein that plays a crucial role in neuronal development and function. However, p35 can be cleaved by an enzyme called calpain, resulting in the formation of a shorter protein called p25. P25 disrupts CDK5 activity by p…	CDK5R1 has been implicated in several neurological disorders, including Alzheimer's disease, Parkinson's disease, and schizophrenia. The accumulation of p25 in brain neurons is associated with Alzheimer's disease and may contribute to the abnormal phosphorylation of tau protein, a hallmark of the disease. Targeted drug discovery efforts have focused on developing inhibitors of CDK5/p25 activity a…	GO:0021586 pons maturation;GO:0021718 superior olivary nucleus development;GO:0021722 superior olivary nucleus maturation		Predicted intracellular proteins	Nucleoplasm (Supported); Additional: Vesicles	Indirubin-3'-monoxime; 6-PHENYL[5H]PYRROLO[2,3-B]PYRAZINE	(M69)PID REELIN PATHWAY; (M163)PID LIS1 PATHWAY; (M270)PID MAPK TRK PATHWAY	(M5919)HALLMARK HEDGEHOG SIGNALING; (M5921)HALLMARK COMPLEMENT; (M5939)HALLMARK P53 PATHWAY	0.0	1.0	1.0	1.0	0.0	0.0	1.0	1.0	0.0	0.0	0.0	0.0	0.0	0.0	0.0	0.0	0.0	0.0	1.0	0.0
ALS2	57679	symbol	H. sapiens	57679	H. sapiens	ALS2	alsin Rho guanine nucleotide exchange factor ALS2	The ALS2 gene encodes a protein called alsin, which is a guanine-nucleotide exchange factor that activates members of the Ras superfamily of GTPases. Als2 functions as a guanine nucleotide exchange factor for the small GTPase RAB5 and modulates endosomal dynamics. Mutations in this gene result in several forms of juvenile lateral sclerosis and infantile-onset ascending spastic paralysis. The prot…	Mutations in the ALS2 gene have been linked to several neurological disorders, including juvenile primary lateral sclerosis (JPLS), infantile-onset ascending spastic paralysis (IAHSP), and hereditary spastic paraplegia (HSP). These disorders are characterized by progressive degeneration of upper motor neurons, leading to muscle weakness and spasticity. There are currently no targeted drugs availa…	GO:0051036 regulation of endosome size;GO:0035022 positive regulation of Rac protein signal transduction;GO:0097494 regulation of vesicle size		Disease related genes; Human disease related genes:Nervous system diseases:Neurodegenerative diseases; Predicted intracellular proteins	Cytosol;Vesicles (Approved)			(M5893)HALLMARK MITOTIC SPINDLE	1.0	0.0	1.0	1.0	0.0	0.0	0.0	0.0	1.0	0.0	0.0	1.0	0.0	0.0	0.0	0.0	0.0	0.0	0.0	0.0
A_24_P118341						None	None	None	None	None	None	None	None	None	None	None	nan	nan	nan	nan	nan	nan	nan	nan	nan	nan	nan	nan	nan	nan	nan	nan	nan	nan	nan	nan
A_24_P557355						None	None	None	None	None	None	None	None	None	None	None	nan	nan	nan	nan	nan	nan	nan	nan	nan	nan	nan	nan	nan	nan	nan	nan	nan	nan	nan	nan
CBLN3	643866	symbol	H. sapiens	643866	H. sapiens	CBLN3	cerebellin 3 precursor	CBLN3 is a gene that belongs to the precerebellin family and encodes for the cerebellin 3 precursor protein. This protein contains a cerebellin motif and a C-terminal C1q signature domain, which allows for trimeric assembly of atypical collagen complexes. However, unlike conventional components of the extracellular matrix, precerebellins do not contain a collagen motif. The function of CBLN3 is n…	Mutations in the CBLN3 gene have been associated with several neurological disorders, including autism spectrum disorder and schizophrenia. As a result, there has been interest in developing drugs that target this gene for therapeutic purposes. However, there are currently no drugs on the market that specifically target CBLN3. One approach to drug discovery for CBLN3-related disorders is to targe…	GO:0099558 maintenance of synapse structure;GO:0034331 cell junction maintenance;GO:0043954 cellular component maintenance		Predicted secreted proteins; Predicted intracellular proteins	Nucleoplasm (Approved)		(M5883)NABA SECRETED FACTORS; (M5885)NABA MATRISOME ASSOCIATED; (M5889)NABA MATRISOME		1.0	0.0	0.0	0.0	0.0	0.0	0.0	0.0	0.0	0.0	0.0	0.0	0.0	0.0	0.0	0.0	0.0	0.0	0.0	0.0
SLC25A23	79085	symbol	H. sapiens	79085	H. sapiens	SLC25A23	solute carrier family 25 member 23	SLC25A23 is a human gene that is predicted to enable ATP transmembrane transporter activity. It is involved in calcium import into the mitochondrion, positive regulation of mitochondrial calcium ion concentration, and regulation of cellular hyperosmotic salinity response. The gene is located in the mitochondrion.	There is limited information available on the disease implications of SLC25A23. However, mutations in this gene have been associated with a rare genetic disorder called congenital sideroblastic anemia (CSA). CSA is characterized by the inability of the bone marrow to produce healthy red blood cells, leading to anemia. There are currently no targeted drug discovery efforts for SLC25A23. However, s…	GO:1900069 regulation of cellular hyperosmotic salinity response;GO:1901000 regulation of response to salt stress;GO:1990544 mitochondrial ATP transmembrane transport		Transporters:Electrochemical Potential-driven transporters; Predicted intracellular proteins	Mitochondria (Supported)			(M5956)HALLMARK KRAS SIGNALING DN	0.0	0.0	0.0	0.0	1.0	0.0	0.0	0.0	0.0	0.0	0.0	0.0	0.0	0.0	0.0	0.0	0.0	0.0	0.0	0.0
C14orf149	112849	gene_synonym	H. sapiens	112849	H. sapiens	L3HYPDH	trans-L-3-hydroxyproline dehydratase	L3HYPDH is a gene that encodes a dehydratase enzyme responsible for converting trans-3-hydroxy-L-proline to delta(1)-pyrroline-2-carboxylate. This enzyme may play a role in breaking down dietary proteins that contain trans-3-hydroxy-L-proline, as well as other proteins such as collagen IV. The protein encoded by this gene can be converted to an epimerase by changing a threonine to a cysteine at a…	There is limited information available on the disease implications of L3HYPDH. However, mutations in this gene have been associated with a rare genetic disorder called hyperprolinemia type II, which is characterized by elevated levels of proline and hydroxyproline in the urine. This disorder can lead to developmental delays, intellectual disability, and seizures. There are currently no targeted d…			ENZYME proteins:Lyases; Enzymes; Predicted intracellular proteins	Vesicles (Uncertain)	Proline			0.0	0.0	0.0	0.0	0.0	0.0	0.0	0.0	0.0	0.0	0.0	0.0	0.0	0.0	0.0	0.0	0.0	0.0	0.0	0.0
ABHD2	11057	symbol	H. sapiens	11057	H. sapiens	ABHD2	abhydrolase domain containing 2, acylglycerol lipase	ABHD2 is a gene that encodes a protein with an alpha/beta hydrolase fold, which is a catalytic domain found in many enzymes. The protein is an acylglycerol lipase that breaks down endocannabinoid arachidonoylglycerol from the cell membrane. This leads to the activation of the sperm calcium channel CatSper, which results in sperm activation. The gene has two transcript variants that encode the sam…	Research on ABHD2 has shown its potential implications in various diseases, including cancer, obesity, and neurological disorders. In cancer, ABHD2 has been found to be overexpressed in certain types of tumors, and its inhibition has been shown to reduce tumor growth and metastasis. In obesity, ABHD2 has been linked to the regulation of lipid metabolism, and its inhibition has been shown to reduc…	GO:0051793 medium-chain fatty acid catabolic process;GO:0051792 medium-chain fatty acid biosynthetic process;GO:0014909 smooth muscle cell migration		ENZYME proteins:Hydrolases; Enzymes; Predicted intracellular proteins	Cytosol;Flagellar centriole (Approved); Additional: Connecting piece;Nucleoplasm			(M5908)HALLMARK ANDROGEN RESPONSE; (M5906)HALLMARK ESTROGEN RESPONSE EARLY; (M5907)HALLMARK ESTROGEN RESPONSE LATE	0.0	0.0	0.0	0.0	0.0	0.0	0.0	1.0	0.0	0.0	0.0	0.0	0.0	0.0	0.0	0.0	0.0	0.0	0.0	0.0
PARD6G-AS1	100130522	symbol	H. sapiens	100130522	H. sapiens	PARD6G-AS1	PARD6G antisense RNA 1										0.0	0.0	0.0	0.0	0.0	0.0	0.0	0.0	0.0	0.0	0.0	0.0	0.0	0.0	0.0	0.0	0.0	0.0	0.0	0.0
GRIA1	2890	symbol	H. sapiens	2890	H. sapiens	GRIA1	glutamate ionotropic receptor AMPA type subunit 1	GRIA1 is a gene that encodes for a subunit of the alpha-amino-3-hydroxy-5-methyl-4-isoxazole propionate (AMPA) receptor, which is a type of glutamate receptor that is involved in excitatory neurotransmission in the brain. Glutamate receptors are protein complexes made up of multiple subunits that form a ligand-gated ion channel. The classification of glutamate receptors is based on their activati…	GRIA1 has been implicated in several neurological and psychiatric disorders, including epilepsy, schizophrenia, bipolar disorder, and autism spectrum disorder. Mutations in GRIA1 have been associated with intellectual disability and developmental delay. Targeted drug discovery efforts have focused on developing drugs that modulate the activity of AMPA receptors, including GRIA1. One example is th…	GO:0090326 positive regulation of locomotion involved in locomotory behavior;GO:0071418 cellular response to amine stimulus;GO:0071242 cellular response to ammonium ion		Predicted intracellular proteins; Human disease related genes:Other diseases:Mental and behavioural disorders; FDA approved drug targets:Small molecule drugs; Disease related genes; Transporters:Transporter channels and pores		Glutamic acid; Butabarbital; Lamotrigine; Isoflurane; Ethanol; Methoxyflurane; Desflurane; Sevoflurane; Talampanel; CX717; CX516; Perampanel; Tianeptine; Fluciclovine (18F)	(M62)PID EPHB FWD PATHWAY		1.0	1.0	0.0	1.0	0.0	0.0	0.0	1.0	0.0	0.0	1.0	1.0	1.0	1.0	0.0	0.0	1.0	0.0	0.0	1.0
A_24_P937182						None	None	None	None	None	None	None	None	None	None	None	nan	nan	nan	nan	nan	nan	nan	nan	nan	nan	nan	nan	nan	nan	nan	nan	nan	nan	nan	nan
NUP93	9688	symbol	H. sapiens	9688	H. sapiens	NUP93	nucleoporin 93	NUP93 is a gene that encodes a nucleoporin protein, which is a main component of the nuclear pore complex in eukaryotic cells. This protein localizes to both the basket of the pore and the nuclear entry of the central gated channel of the pore. It is a target of caspase cysteine proteases, which play a role in programmed cell death by apoptosis. Alternative splicing of the gene results in multipl…	NUP93 has been implicated in several diseases, including cancer, viral infections, and developmental disorders. In cancer, NUP93 has been shown to be overexpressed in various types of tumors, including breast, lung, and prostate cancer, and is associated with poor prognosis. Targeting NUP93 has been explored as a potential therapeutic strategy for cancer treatment. For example, a small molecule i…	GO:0051292 nuclear pore complex assembly;GO:0006999 nuclear pore organization;GO:0046931 pore complex assembly		Predicted intracellular proteins; Human disease related genes:Urinary system diseases:Kidney diseases; Potential drug targets; Disease related genes; Transporters:Transporter channels and pores; Cancer-related genes:Mutational cancer driver genes				(M5913)HALLMARK INTERFERON GAMMA RESPONSE	0.0	0.0	0.0	0.0	0.0	0.0	0.0	0.0	0.0	0.0	0.0	0.0	0.0	0.0	0.0	0.0	0.0	0.0	0.0	0.0
TAS2R48	259294	gene_synonym	H. sapiens	259294	H. sapiens	TAS2R19	taste 2 receptor member 19	TAS2R19 is a human gene that is predicted to enable G protein-coupled receptor activity and be involved in the G protein-coupled receptor signaling pathway and sensory perception of taste. It is an integral component of the membrane.	There is limited information available on the disease implications of TAS2R19. However, research has suggested that genetic variations in this gene may be associated with differences in taste perception and food preferences. As for targeted drug discovery efforts, TAS2R19 is a potential target for the development of drugs that can modulate taste perception and potentially help individuals with ta…	GO:0007186 G protein-coupled receptor signaling pathway;GO:0007165 signal transduction;GO:0023052 signaling		G-protein coupled receptors:Family T2R receptors (taste receptor GPCRs); G-protein coupled receptors:GPCRs excl olfactory receptors; Transporters					0.0	0.0	0.0	0.0	0.0	0.0	0.0	0.0	0.0	0.0	0.0	0.0	0.0	0.0	0.0	0.0	0.0	0.0	0.0	0.0
BOD1L	259282	gene_synonym	H. sapiens	259282	H. sapiens	BOD1L1	biorientation of chromosomes in cell division 1 like 1	BOD1L1 is a human gene that is involved in the biorientation of chromosomes during cell division. It is predicted to have protein phosphatase 2A binding activity and protein phosphatase inhibitor activity. The gene is also involved in the cellular response to DNA damage stimulus and replication fork processing. BOD1L1 is located in the nucleoplasm.	There is limited information available on the disease implications of BOD1L1. However, recent studies have suggested that mutations in this gene may be associated with the development of certain types of cancer, including breast cancer and ovarian cancer. Targeted drug discovery efforts for BOD1L1 are still in the early stages, but there is potential for the development of drugs that target the p…	GO:0031297 replication fork processing;GO:0045005 DNA-templated DNA replication maintenance of fidelity;GO:0006261 DNA-templated DNA replication		Predicted intracellular proteins	Nucleoplasm (Enhanced)				0.0	0.0	0.0	0.0	0.0	0.0	0.0	0.0	0.0	0.0	0.0	0.0	0.0	0.0	0.0	0.0	0.0	0.0	0.0	0.0
KDM2A	22992	symbol	H. sapiens	22992	H. sapiens	KDM2A	lysine demethylase 2A	KDM2A is a gene that belongs to the Fbls class of the F-box protein family. It contains an F-box and at least six highly degenerated leucine-rich repeats. This gene plays a role in epigenetic silencing by nucleating at CpG islands and specifically demethylating both mono- and di-methylated lysine-36 of histone H3. The F-box proteins constitute one of the four subunits of ubiquitin protein ligase …	KDM2A has been implicated in various diseases, including cancer, neurological disorders, and metabolic disorders. In cancer, KDM2A has been shown to promote tumor growth and metastasis by regulating the expression of genes involved in cell proliferation, apoptosis, and angiogenesis. Targeting KDM2A has emerged as a potential therapeutic strategy for cancer treatment. Several small molecule inhibi…	GO:0010944 negative regulation of transcription by competitive promoter binding;GO:0006303 double-strand break repair via nonhomologous end joining;GO:0032922 circadian regulation of gene expression		Transcription factors:Zinc-coordinating DNA-binding domains; Enzymes; ENZYME proteins:Oxidoreductases; Predicted intracellular proteins	Nucleoplasm (Supported)				0.0	0.0	0.0	0.0	0.0	0.0	0.0	0.0	0.0	0.0	0.0	0.0	0.0	0.0	0.0	0.0	0.0	0.0	0.0	0.0
RNFT1	51136	symbol	H. sapiens	51136	H. sapiens	RNFT1	ring finger protein, transmembrane 1	RNFT1, also known as Ring Finger Protein, Transmembrane 1, is a gene that encodes a protein involved in the regulation of protein degradation pathways. The protein has ubiquitin binding and ligase activity and is located in the endoplasmic reticulum. It plays a role in the positive regulation of the ERAD pathway and autoubiquitination of proteins. The ERAD pathway is responsible for the degradati…	There is limited information available on the disease implications of RNFT1. However, studies have suggested that dysregulation of the ERAD pathway, in which RNFT1 plays a role, can lead to the accumulation of misfolded proteins and contribute to the development of neurodegenerative diseases such as Alzheimer's and Parkinson's disease. Currently, there are no targeted drug discovery efforts speci…	GO:1904294 positive regulation of ERAD pathway;GO:1904292 regulation of ERAD pathway;GO:1905898 positive regulation of response to endoplasmic reticulum stress		Enzymes; ENZYME proteins:Transferases	Nucleoli (Approved)				0.0	0.0	0.0	0.0	1.0	0.0	0.0	0.0	0.0	0.0	0.0	0.0	0.0	0.0	0.0	0.0	0.0	0.0	0.0	0.0
NIN	51199	symbol	H. sapiens	51199	H. sapiens	NIN	ninein	The NIN gene encodes a protein that plays a crucial role in the function of centrosomes, which are important for cell division and organization. Specifically, this protein helps to position and anchor microtubules in epithelial cells. The protein requires three leucine zippers in its central coiled-coil domain to localize to the centrosome. There are multiple versions of the protein that can be p…	There is limited information on the disease implications of the NIN gene. However, mutations in the gene have been associated with a rare genetic disorder called microcephaly with or without chorioretinopathy, lymphedema, or mental retardation (MCLMR). This disorder is characterized by a small head size, vision problems, swelling of the limbs due to lymphatic system abnormalities, and intellectua…	GO:0090222 centrosome-templated microtubule nucleation;GO:0051418 microtubule nucleation by microtubule organizing center;GO:0021540 corpus callosum morphogenesis		Disease related genes; Cancer-related genes:Mutational cancer driver genes; Predicted intracellular proteins; Human disease related genes:Congenital malformations:Other congenital malformations	Basal body;Centrosome (Supported); Additional: Nucleoli;Nucleoli rim			(M5893)HALLMARK MITOTIC SPINDLE; (M5953)HALLMARK KRAS SIGNALING UP	0.0	1.0	1.0	0.0	0.0	0.0	0.0	0.0	0.0	0.0	0.0	0.0	0.0	0.0	0.0	0.0	0.0	1.0	0.0	0.0
ZNF238	10472	gene_synonym	H. sapiens	10472	H. sapiens	ZBTB18	zinc finger and BTB domain containing 18	ZBTB18 is a gene that encodes a protein with C2H2-type zinc finger and BTB domains. This protein acts as a transcriptional repressor of genes involved in neuronal development by recognizing a specific sequence motif and recruiting chromatin components to target genes. Alternative splicing of the gene results in multiple transcript variants.	Research on ZBTB18 has revealed its potential involvement in various diseases, including cancer, neurological disorders, and developmental disorders. In particular, studies have shown that ZBTB18 plays a role in the development and function of the nervous system, and mutations in the gene have been associated with intellectual disability and autism spectrum disorders. Targeted drug discovery effo…	GO:0007519 skeletal muscle tissue development;GO:0060538 skeletal muscle organ development;GO:0007517 muscle organ development		Disease related genes; Human disease related genes:Other diseases:Mental and behavioural disorders; Predicted intracellular proteins; Transcription factors:Zinc-coordinating DNA-binding domains	Nuclear speckles;Nucleoplasm (Supported)				0.0	0.0	0.0	0.0	0.0	0.0	0.0	0.0	0.0	0.0	0.0	0.0	0.0	0.0	0.0	0.0	0.0	0.0	0.0	0.0
JMJD1C	221037	symbol	H. sapiens	221037	H. sapiens	JMJD1C	jumonji domain containing 1C	JMJD1C is a human gene that encodes a protein containing a jumonji domain and interacts with thyroid hormone receptors. It is believed to be a histone demethylase and a coactivator for important transcription factors. The gene plays a role in the DNA-damage response pathway by demethylating the mediator of DNA damage checkpoint 1 (MDC1) protein and is necessary for the survival of acute myeloid l…	JMJD1C has been implicated in several diseases, including Rett syndrome and intellectual disability. Mutations in the gene have been found in patients with these conditions, suggesting that JMJD1C plays a role in normal brain development and function. Targeted drug discovery efforts for JMJD1C are still in the early stages, but there is potential for the development of drugs that could modulate i…	GO:0007596 blood coagulation;GO:0050817 coagulation;GO:0007599 hemostasis		Predicted intracellular proteins	Nucleoplasm (Supported); Additional: Cytosol				0.0	0.0	0.0	0.0	0.0	0.0	0.0	0.0	0.0	0.0	0.0	0.0	0.0	0.0	0.0	0.0	0.0	0.0	0.0	0.0
STAG3L2	442582	symbol	H. sapiens	442582	H. sapiens	STAG3L2	STAG3 cohesin complex component like 2 (pseudogene)										0.0	0.0	0.0	0.0	0.0	0.0	0.0	0.0	0.0	0.0	0.0	0.0	0.0	0.0	0.0	0.0	0.0	0.0	0.0	0.0
ATP2B1	490	symbol	H. sapiens	490	H. sapiens	ATP2B1	ATPase plasma membrane Ca2+ transporting 1	ATP2B1 is a gene that encodes the plasma membrane calcium ATPase isoform 1, which belongs to the family of P-type primary ion transport ATPases. These enzymes play a critical role in intracellular calcium homeostasis by removing bivalent calcium ions from eukaryotic cells against very large concentration gradients. The mammalian plasma membrane calcium ATPase isoforms are encoded by at least four…	ATP2B1 has been implicated in several diseases, including hypertension, cardiovascular disease, and Alzheimer's disease. Genome-wide association studies have identified ATP2B1 as a susceptibility gene for hypertension, and several studies have shown that genetic variants in ATP2B1 are associated with increased blood pressure. Targeted drug discovery efforts have focused on developing inhibitors o…	GO:1990034 calcium ion export across plasma membrane;GO:0003056 regulation of vascular associated smooth muscle contraction;GO:0051481 negative regulation of cytosolic calcium ion concentration		Transporters:Primary Active Transporters; FDA approved drug targets:Small molecule drugs; Enzymes; Disease related genes; ENZYME proteins	Plasma membrane (Supported)	Halothane	(M195)PID CMYB PATHWAY	(M5942)HALLMARK UV RESPONSE DN; (M5890)HALLMARK TNFA SIGNALING VIA NFKB; (M5932)HALLMARK INFLAMMATORY RESPONSE	0.0	0.0	0.0	0.0	0.0	0.0	0.0	0.0	0.0	0.0	0.0	1.0	1.0	0.0	0.0	1.0	0.0	0.0	0.0	0.0
KCNQ1OT1	10984	symbol	H. sapiens	10984	H. sapiens	KCNQ1OT1	KCNQ1 opposite strand/antisense transcript 1										0.0	0.0	0.0	0.0	0.0	0.0	0.0	0.0	0.0	0.0	0.0	0.0	0.0	0.0	0.0	0.0	0.0	0.0	0.0	0.0
ZNF154	7710	symbol	H. sapiens	7710	H. sapiens	ZNF154	zinc finger protein 154	ZNF154 is a gene that encodes a protein belonging to the zinc finger Kruppel family of transcriptional regulators. These regulators are believed to play a role in normal and abnormal cell growth and differentiation. The gene has multiple transcript variants due to alternative splicing. Hypermethylation of this gene has been linked to the recurrence of non-muscle invasive bladder cancer.	ZNF154 has been implicated in various diseases, including cancer and neurological disorders. In bladder cancer, hypermethylation of the gene has been associated with tumor recurrence and poor prognosis. In addition, ZNF154 has been found to be downregulated in several types of cancer, including breast, lung, and prostate cancer, suggesting a potential tumor suppressor role. Targeted drug discover…	GO:0006357 regulation of transcription by RNA polymerase II;GO:0006355 regulation of DNA-templated transcription;GO:2001141 regulation of RNA biosynthetic process		Transcription factors:Zinc-coordinating DNA-binding domains; Predicted intracellular proteins	Nucleoli fibrillar center;Nucleoplasm (Approved)				0.0	0.0	0.0	0.0	0.0	0.0	0.0	0.0	0.0	0.0	0.0	0.0	0.0	0.0	0.0	0.0	0.0	0.0	0.0	0.0
LOC440917	440917	Gene_ID	H. sapiens	440917	H. sapiens	YWHAEP5	tyrosine 3-monooxygenase/tryptophan 5-monooxygenase activation protein epsilon pseudogene 5										0.0	0.0	0.0	0.0	0.0	0.0	0.0	0.0	0.0	0.0	0.0	0.0	0.0	0.0	0.0	0.0	0.0	0.0	0.0	0.0
HNRNPK	3190	symbol	H. sapiens	3190	H. sapiens	HNRNPK	heterogeneous nuclear ribonucleoprotein K	HNRNPK is a gene that belongs to a family of RNA binding proteins called heterogeneous nuclear ribonucleoproteins (hnRNPs). These proteins are associated with pre-mRNAs in the nucleus and are involved in pre-mRNA processing, mRNA metabolism, and transport. HNRNPK is located in the nucleoplasm and has three repeats of KH domains that bind to RNAs. It has a distinct binding preference for poly(C) a…	HNRNPK has been implicated in several diseases, including cancer, viral infections, and neurological disorders. In cancer, HNRNPK has been shown to promote tumor growth and metastasis by regulating alternative splicing of cancer-related genes. Targeting HNRNPK has emerged as a potential therapeutic strategy for cancer treatment. Several small molecule inhibitors of HNRNPK have been developed, inc…	GO:1905599 positive regulation of low-density lipoprotein receptor activity;GO:0060816 random inactivation of X chromosome;GO:1902165 regulation of intrinsic apoptotic signaling pathway in response to DNA damage by p53 class mediator		Disease related genes; Predicted intracellular proteins; Human disease related genes:Congenital malformations:Other congenital malformations	Nucleoplasm (Enhanced)	Artenimol; Phenethyl Isothiocyanate			0.0	0.0	0.0	0.0	1.0	0.0	0.0	0.0	0.0	0.0	0.0	0.0	0.0	0.0	0.0	0.0	0.0	0.0	0.0	0.0
CHMP1A	5119	symbol	H. sapiens	5119	H. sapiens	CHMP1A	charged multivesicular body protein 1A	CHMP1A is a gene that belongs to the CHMP/Chmp family of proteins. These proteins are involved in sorting proteins to the interiors of lysosomes, which are organelles responsible for breaking down and recycling cellular waste. Initially, it was thought that the protein encoded by CHMP1A was a metallopeptidase, but recent updates have corrected this assumption to reflect its true biological functi…	Mutations in CHMP1A have been linked to several neurodegenerative disorders, including frontotemporal dementia (FTD) and amyotrophic lateral sclerosis (ALS). In FTD, CHMP1A mutations have been found to disrupt the normal function of lysosomes, leading to the accumulation of toxic proteins in the brain. In ALS, CHMP1A mutations have been associated with impaired autophagy, a process by which cells…	GO:1904896 ESCRT complex disassembly;GO:1904903 ESCRT III complex disassembly;GO:0051469 vesicle fusion with vacuole		Disease related genes; Human disease related genes:Congenital malformations:Congenital malformations of the nervous system; Predicted intracellular proteins	Centrosome;Cytosol;Nucleoplasm (Supported)			(M5901)HALLMARK G2M CHECKPOINT	0.0	0.0	0.0	0.0	0.0	0.0	0.0	0.0	0.0	1.0	0.0	0.0	0.0	0.0	0.0	0.0	0.0	0.0	0.0	0.0
A_24_P924301						None	None	None	None	None	None	None	None	None	None	None	nan	nan	nan	nan	nan	nan	nan	nan	nan	nan	nan	nan	nan	nan	nan	nan	nan	nan	nan	nan
NR2F6	2063	symbol	H. sapiens	2063	H. sapiens	NR2F6	nuclear receptor subfamily 2 group F member 6	NR2F6 is a human gene that encodes a protein belonging to the nuclear receptor subfamily 2 group F member 6. This protein is involved in regulating gene expression by binding to specific DNA sequences and inhibiting the activity of RNA polymerase II, a key enzyme involved in transcription. NR2F6 is primarily located in the nucleus of cells and has been shown to have DNA-binding transcription fact…	NR2F6 has been implicated in various diseases, including cancer, autoimmune disorders, and metabolic disorders. In cancer, NR2F6 has been shown to promote tumor growth and metastasis by regulating the expression of genes involved in cell proliferation, angiogenesis, and immune evasion. In autoimmune disorders, NR2F6 has been found to play a role in regulating the differentiation and function of i…	GO:0050965 detection of temperature stimulus involved in sensory perception of pain;GO:0043153 entrainment of circadian clock by photoperiod;GO:0050961 detection of temperature stimulus involved in sensory perception		Transcription factors:Zinc-coordinating DNA-binding domains; Nuclear receptors; Predicted intracellular proteins	Nuclear speckles (Supported); Additional: Cytosol				0.0	0.0	0.0	0.0	0.0	0.0	0.0	0.0	0.0	0.0	0.0	0.0	0.0	0.0	0.0	0.0	0.0	0.0	0.0	0.0
A_24_P716249						None	None	None	None	None	None	None	None	None	None	None	nan	nan	nan	nan	nan	nan	nan	nan	nan	nan	nan	nan	nan	nan	nan	nan	nan	nan	nan	nan
A_24_P494600						None	None	None	None	None	None	None	None	None	None	None	nan	nan	nan	nan	nan	nan	nan	nan	nan	nan	nan	nan	nan	nan	nan	nan	nan	nan	nan	nan
MED29	55588	symbol	H. sapiens	55588	H. sapiens	MED29	mediator complex subunit 29	MED29 is a gene that encodes a subunit of the Mediator complex, which is a group of proteins that helps activate RNA transcription by interacting with DNA-bound transcriptional activators, RNA polymerase II, and general initiation factors. MED29 plays a role in regulating gene expression and is involved in various cellular processes. Mutations in MED29 have been associated with developmental diso…	Mutations in MED29 have been associated with developmental disorders and intellectual disabilities. Specifically, a missense mutation in MED29 has been linked to a rare genetic disorder called Ohdo syndrome, which is characterized by intellectual disability, facial abnormalities, and other developmental delays. As for targeted drug discovery efforts, there is currently limited research on develop…	GO:0032968 positive regulation of transcription elongation by RNA polymerase II;GO:0032786 positive regulation of DNA-templated transcription, elongation;GO:0051123 RNA polymerase II preinitiation complex assembly		Predicted intracellular proteins	Nucleoplasm (Supported)				0.0	0.0	0.0	0.0	0.0	0.0	0.0	0.0	0.0	0.0	0.0	0.0	0.0	0.0	0.0	0.0	0.0	0.0	0.0	0.0
AP1G2	8906	symbol	H. sapiens	8906	H. sapiens	AP1G2	adaptor related protein complex 1 subunit gamma 2	AP1G2 is a gene that encodes for the gamma-adaptin protein, which is a component of the adaptor complex involved in the formation of clathrin-coated vesicles. These vesicles transport ligand-receptor complexes from the plasma membrane or trans-Golgi network to lysosomes. The adaptor complex is composed of four classes of molecules, including alpha, beta-, beta prime-, and gamma-adaptins, which fo…	There is limited information available on the disease implications of AP1G2. However, mutations in other genes encoding for components of the adaptor complex have been associated with various diseases, including cancer, neurodegenerative disorders, and infectious diseases. Targeted drug discovery efforts for AP1G2 are also limited, but there is potential for the development of drugs that modulate…	GO:0006896 Golgi to vacuole transport;GO:0006892 post-Golgi vesicle-mediated transport;GO:0007034 vacuolar transport		Predicted intracellular proteins					0.0	0.0	0.0	0.0	0.0	0.0	0.0	0.0	0.0	0.0	0.0	0.0	0.0	0.0	0.0	0.0	0.0	0.0	0.0	0.0
NLGN4X	57502	symbol	H. sapiens	57502	H. sapiens	NLGN4X	neuroligin 4 X-linked	NLGN4X is a gene that encodes a protein belonging to the type-B carboxylesterase/lipase family. This protein is a member of the neuronal cell surface protein family and may act as a splice site-specific ligand for beta-neurexins, which are involved in the formation and remodeling of central nervous system synapses. NLGN4X interacts with discs large homolog 4 (DLG4) and mutations in this gene have…	Mutations in the NLGN4X gene have been linked to autism and Asperger syndrome, which are neurodevelopmental disorders characterized by impaired social interaction, communication, and repetitive behaviors. Targeted drug discovery efforts for these disorders have focused on modulating the function of NLGN4X and its interaction with beta-neurexins. One approach has been to develop small molecules th…	GO:0003360 brainstem development;GO:0097105 presynaptic membrane assembly;GO:0097090 presynaptic membrane organization		Predicted intracellular proteins; Human disease related genes:Other diseases:Mental and behavioural disorders; Transporters:Accessory Factors Involved in Transport; Potential drug targets; Disease related genes					1.0	1.0	0.0	1.0	0.0	0.0	0.0	0.0	0.0	0.0	1.0	1.0	0.0	1.0	0.0	0.0	0.0	0.0	0.0	1.0
PMS2	5395	symbol	H. sapiens	5395	H. sapiens	PMS2	PMS1 homolog 2, mismatch repair system component	PMS2, also known as PMS1 homolog 2, is a human gene that plays a crucial role in the mismatch repair system. This system is responsible for correcting DNA mismatches and small insertions and deletions that can occur during DNA replication and homologous recombination. PMS2 forms heterodimers with the gene product of the MLH1 gene to form the MutL-alpha heterodimer, which possesses an endonucleoly…	Mutations in the PMS2 gene have been associated with hereditary nonpolyposis colorectal cancer (HNPCC) and Turcot syndrome. HNPCC is an autosomal dominant disorder that predisposes individuals to various types of cancer, including colorectal, endometrial, ovarian, gastric, pancreatic, and urinary tract cancers. Turcot syndrome is a rare genetic disorder that is characterized by the development of…	GO:0048296 regulation of isotype switching to IgA isotypes;GO:0048298 positive regulation of isotype switching to IgA isotypes;GO:0048304 positive regulation of isotype switching to IgG isotypes		Predicted intracellular proteins; Cancer-related genes; Human disease related genes:Cancers:Cancers of the digestive system; Human disease related genes:Other diseases:Others; Disease related genes	Nucleoplasm (Supported); Additional: Cytosol	Adenosine 5'-[gamma-thio]triphosphate	(M145)PID P53 DOWNSTREAM PATHWAY	(M5925)HALLMARK E2F TARGETS	0.0	0.0	0.0	0.0	1.0	0.0	0.0	0.0	0.0	0.0	0.0	0.0	0.0	0.0	0.0	0.0	0.0	0.0	0.0	0.0
PSD	5662	symbol	H. sapiens	5662	H. sapiens	PSD	pleckstrin and Sec7 domain containing	The human gene PSD encodes a protein that contains both Plekstrin homology and SEC7 domains. This protein acts as a guanine nucleotide exchange factor, which means it regulates signal transduction by activating ADP-ribosylation factor 6. Alternative splicing of the gene results in multiple transcript variants.	PSD gene mutations have been associated with several diseases, including cancer, neurological disorders, and cardiovascular diseases. For example, mutations in PSD have been linked to the development of breast cancer, where the protein is overexpressed and promotes tumor growth. In addition, PSD has been implicated in the pathogenesis of Alzheimer's disease, where it plays a role in the regulatio…	GO:0032012 regulation of ARF protein signal transduction;GO:0051056 regulation of small GTPase mediated signal transduction;GO:0031175 neuron projection development		Predicted intracellular proteins					0.0	0.0	1.0	0.0	0.0	0.0	0.0	0.0	0.0	1.0	0.0	0.0	0.0	0.0	0.0	0.0	0.0	0.0	0.0	0.0
LOC645181	645181	Gene_ID	H. sapiens	645181	H. sapiens	LOC645181	PDGFA associated protein 1 pseudogene										0.0	0.0	0.0	0.0	0.0	0.0	0.0	0.0	0.0	0.0	0.0	0.0	0.0	0.0	0.0	0.0	0.0	0.0	0.0	0.0
GPR83	10888	symbol	H. sapiens	10888	H. sapiens	GPR83	G protein-coupled receptor 83	GPR83 is a human gene that encodes a protein called G protein-coupled receptor 83. This protein is predicted to have neuropeptide receptor activity and be involved in neuropeptide signaling pathways. It is also predicted to act upstream of or within the response to glucocorticoid. GPR83 is located in the cilium, a hair-like structure on the surface of cells that is involved in cell signaling and …	There is limited information available on the disease implications of GPR83. However, some studies have suggested that it may be involved in the development and progression of certain types of cancer, including breast cancer and glioblastoma. As a result, there has been some interest in targeting GPR83 for cancer therapy. There have been some drug discovery efforts targeting GPR83, but no drugs h…	GO:0007631 feeding behavior;GO:0007218 neuropeptide signaling pathway;GO:0007200 phospholipase C-activating G protein-coupled receptor signaling pathway		G-protein coupled receptors:GPCRs excl olfactory receptors	Primary cilium (Approved); Additional: Basal body;Cytosol;Nucleoplasm			(M5947)HALLMARK IL2 STAT5 SIGNALING	0.0	0.0	0.0	0.0	0.0	0.0	0.0	0.0	0.0	0.0	1.0	0.0	0.0	0.0	0.0	0.0	0.0	0.0	0.0	0.0
A_24_P693454						None	None	None	None	None	None	None	None	None	None	None	nan	nan	nan	nan	nan	nan	nan	nan	nan	nan	nan	nan	nan	nan	nan	nan	nan	nan	nan	nan
DOCK4	9732	symbol	H. sapiens	9732	H. sapiens	DOCK4	dedicator of cytokinesis 4	DOCK4 is a gene that belongs to the dedicator of cytokinesis (DOCK) family and encodes a protein with a DHR-1 (CZH-1) domain, a DHR-2 (CZH-2) domain, and an SH3 domain. This protein is involved in regulating adherens junctions between cells and functions as a guanine nucleotide exchange factor. Mutations in DOCK4 have been linked to various types of cancer, including ovarian, prostate, glioma, an…	DOCK4 has been implicated in various types of cancer, including ovarian, prostate, glioma, and colorectal cancers. In ovarian cancer, DOCK4 has been shown to promote tumor growth and metastasis by regulating the activity of Rho GTPases. In prostate cancer, DOCK4 has been found to be overexpressed and associated with poor prognosis. In glioma, DOCK4 has been identified as a potential therapeutic t…	GO:1904694 negative regulation of vascular associated smooth muscle contraction;GO:0003056 regulation of vascular associated smooth muscle contraction;GO:0045906 negative regulation of vasoconstriction		Predicted intracellular proteins	Nucleoli;Plasma membrane (Approved); Additional: Cytosol;Golgi apparatus		(M186)PID PDGFRB PATHWAY	(M5893)HALLMARK MITOTIC SPINDLE; (M5921)HALLMARK COMPLEMENT	0.0	0.0	0.0	0.0	0.0	0.0	0.0	1.0	1.0	0.0	0.0	0.0	0.0	0.0	0.0	0.0	0.0	0.0	0.0	0.0
PMS2L2	5380	gene_synonym	H. sapiens	5380	H. sapiens	PMS2P2	PMS1 homolog 2, mismatch repair system component pseudogene 2										0.0	0.0	0.0	0.0	0.0	0.0	0.0	0.0	0.0	0.0	0.0	0.0	0.0	0.0	0.0	0.0	0.0	0.0	0.0	0.0
A_32_P216888						None	None	None	None	None	None	None	None	None	None	None	nan	nan	nan	nan	nan	nan	nan	nan	nan	nan	nan	nan	nan	nan	nan	nan	nan	nan	nan	nan
SFRS5	6430	gene_synonym	H. sapiens	6430	H. sapiens	SRSF5	serine and arginine rich splicing factor 5	SRSF5, also known as serine and arginine rich splicing factor 5, is a protein that belongs to the serine/arginine-rich family of pre-mRNA splicing factors. These factors are part of the spliceosome and contain an RNA recognition motif (RRM) for binding RNA and an RS domain for binding other proteins. The RS domain is rich in serine and arginine residues and facilitates interaction between differe…	SRSF5 has been implicated in various diseases, including cancer, spinal muscular atrophy, and Alzheimer's disease. In cancer, SRSF5 has been shown to promote tumor growth and metastasis by regulating alternative splicing of genes involved in cell proliferation, apoptosis, and angiogenesis. Targeting SRSF5 with small molecule inhibitors or RNA interference has been explored as a potential therapeu…	GO:0006376 mRNA splice site recognition;GO:0000245 spliceosomal complex assembly;GO:0022618 protein-RNA complex assembly		Predicted intracellular proteins	Nucleoplasm (Supported); Additional: Cytosol;Nucleoli				0.0	0.0	0.0	0.0	0.0	0.0	0.0	0.0	0.0	0.0	0.0	0.0	0.0	0.0	0.0	0.0	0.0	0.0	0.0	0.0
LOC100292841						None	None	None	None	None	None	None	None	None	None	None	nan	nan	nan	nan	nan	nan	nan	nan	nan	nan	nan	nan	nan	nan	nan	nan	nan	nan	nan	nan
TRIM28	10155	symbol	H. sapiens	10155	H. sapiens	TRIM28	tripartite motif containing 28	TRIM28 is a human gene that encodes a protein involved in transcriptional control. The protein interacts with the Kruppel-associated box repression domain found in many transcription factors and is thought to associate with specific chromatin regions in the nucleus. TRIM28 belongs to the tripartite motif family, which includes three zinc-binding domains (a RING, a B-box type 1, and a B-box type 2…	TRIM28 has been implicated in various diseases, including cancer, viral infections, and neurological disorders. In cancer, TRIM28 has been shown to play a role in tumor growth and metastasis, making it a potential target for cancer therapy. Several studies have explored the use of TRIM28 inhibitors as a potential treatment for cancer, with promising results in preclinical models. In viral infecti…	GO:0060028 convergent extension involved in axis elongation;GO:0045869 negative regulation of single stranded viral RNA replication via double stranded DNA intermediate;GO:0060026 convergent extension		Enzymes; Predicted intracellular proteins; ENZYME proteins:Transferases	Nucleoplasm (Enhanced)		(M84)PID ATM PATHWAY; (M261)PID P53 REGULATION PATHWAY; (M40)PID E2F PATHWAY	(M5926)HALLMARK MYC TARGETS V1	0.0	0.0	0.0	0.0	1.0	0.0	1.0	0.0	0.0	0.0	0.0	0.0	0.0	0.0	0.0	0.0	0.0	0.0	0.0	0.0
BMS1P5	399761	gene_synonym	H. sapiens	399761	H. sapiens	BMS1P1	BMS1 pseudogene 1										0.0	0.0	0.0	0.0	0.0	0.0	0.0	0.0	0.0	0.0	0.0	0.0	0.0	0.0	0.0	0.0	0.0	0.0	0.0	0.0
ARRDC4	91947	symbol	H. sapiens	91947	H. sapiens	ARRDC4	arrestin domain containing 4	ARRDC4 is a human gene that is predicted to have ubiquitin ligase-substrate adaptor activity. It plays a role in positive regulation of ubiquitin-protein transferase activity and is located in both the endosome and plasma membrane. This information is provided by the Alliance of Genome Resources as of April 2022.	There is limited information available on the disease implications of ARRDC4. However, recent studies have suggested that it may play a role in the development and progression of certain types of cancer, including breast cancer and lung cancer. Targeted drug discovery efforts for ARRDC4 are still in the early stages, but there is potential for the development of drugs that target its ubiquitin li…	GO:0140112 extracellular vesicle biogenesis;GO:0051443 positive regulation of ubiquitin-protein transferase activity;GO:0051438 regulation of ubiquitin-protein transferase activity		Predicted intracellular proteins	Plasma membrane (Supported); Additional: Vesicles				0.0	0.0	0.0	0.0	0.0	0.0	0.0	0.0	0.0	0.0	0.0	0.0	0.0	0.0	0.0	0.0	0.0	0.0	0.0	0.0
FKBP11	51303	symbol	H. sapiens	51303	H. sapiens	FKBP11	FKBP prolyl isomerase 11	FKBP11 is a gene that belongs to the FKBP family of peptidyl-prolyl cis/trans isomerases. These proteins catalyze the folding of proline-containing polypeptides. The activity of FKBP proteins is inhibited by immunosuppressant compounds FK506 and rapamycin. The function of FKBP11 is not well understood, but it has been suggested to play a role in protein folding and trafficking. Mutations in this …	Mutations in the FKBP11 gene have been associated with osteogenesis imperfecta (OI), a rare genetic disorder that affects bone strength and structure. OI is characterized by brittle bones that are prone to fractures, as well as other skeletal abnormalities such as scoliosis and short stature. There is currently no cure for OI, and treatment options are limited to managing symptoms and preventing …	GO:0061077 chaperone-mediated protein folding;GO:0006457 protein folding;GO:0051604 protein maturation		Enzymes; ENZYME proteins:Isomerase; Predicted intracellular proteins	Centrosome (Approved)				0.0	0.0	0.0	0.0	0.0	0.0	0.0	0.0	0.0	0.0	0.0	0.0	0.0	0.0	0.0	0.0	0.0	0.0	0.0	0.0
A_32_P122962						None	None	None	None	None	None	None	None	None	None	None	nan	nan	nan	nan	nan	nan	nan	nan	nan	nan	nan	nan	nan	nan	nan	nan	nan	nan	nan	nan
NAPA	8775	symbol	H. sapiens	8775	H. sapiens	NAPA	NSF attachment protein alpha	The human gene NAPA encodes a soluble NSF attachment protein (SNAP) that is involved in the fusion of vesicles to target membranes. SNAP proteins are part of the 20S NSF-SNAP-SNARE complex, which plays a critical role in this process. NAPA specifically mediates the interaction between N-ethylmaleimide-sensitive factor (NSF) and the vesicle-associated and membrane-associated SNAP receptor (SNARE) …	Research has shown that mutations in the NAPA gene may be associated with certain neurological disorders, including Alzheimer's disease and schizophrenia. Additionally, studies have suggested that NAPA may play a role in the development and progression of certain cancers, such as breast cancer. Targeted drug discovery efforts for NAPA have focused on developing small molecule inhibitors that can …	GO:0035494 SNARE complex disassembly;GO:0010807 regulation of synaptic vesicle priming;GO:0045176 apical protein localization		Predicted intracellular proteins	Cytosol (Uncertain)			(M5910)HALLMARK PROTEIN SECRETION	0.0	1.0	0.0	1.0	0.0	0.0	0.0	0.0	0.0	0.0	0.0	0.0	0.0	0.0	0.0	0.0	0.0	0.0	0.0	0.0
NEO1	4756	symbol	H. sapiens	4756	H. sapiens	NEO1	neogenin 1	NEO1, also known as neogenin 1, is a gene that encodes a cell surface protein belonging to the immunoglobulin superfamily. The protein consists of four immunoglobulin-like domains, six fibronectin type III domains, a transmembrane domain, and a C-terminal internal domain that shares homology with the tumor suppressor candidate gene DCC. NEO1 is involved in cell growth, differentiation, and cell-c…	There is limited information available on targeted drug discovery efforts for NEO1. However, studies have shown that defects in this gene are associated with cell proliferation in certain cancers, including breast, lung, and pancreatic cancer. Therefore, NEO1 may serve as a potential therapeutic target for these types of cancer. Currently, there are no drugs on the market that specifically target…	GO:0099550 trans-synaptic signaling, modulating synaptic transmission;GO:0048681 negative regulation of axon regeneration;GO:0070571 negative regulation of neuron projection regeneration		Cancer-related genes:Candidate cancer biomarkers	Nucleoplasm;Plasma membrane (Approved); Additional: Golgi apparatus				0.0	0.0	1.0	1.0	1.0	0.0	1.0	0.0	0.0	0.0	0.0	0.0	0.0	0.0	0.0	0.0	0.0	0.0	1.0	0.0
GFOD1	54438	symbol	H. sapiens	54438	H. sapiens	GFOD1	Gfo/Idh/MocA-like oxidoreductase domain containing 1	GFOD1 is a human gene that is predicted to have nucleotide binding and oxidoreductase activities. It is also predicted to be located in the extracellular region. The function of this gene is not yet fully understood, but it may play a role in glucose and fructose metabolism. Further research is needed to determine the exact function of GFOD1 and its potential implications for human health.	Unfortunately, there is currently limited information available on the disease implications and targeted drug discovery efforts for GFOD1. As the function of this gene is not yet fully understood, it is difficult to determine its potential role in disease. However, further research may reveal potential disease associations and drug targets. At this time, there are no known drugs on the market tha…			Predicted secreted proteins; Predicted intracellular proteins	Cytosol;Nucleoplasm (Approved); Additional: Plasma membrane				0.0	0.0	0.0	0.0	0.0	0.0	0.0	0.0	1.0	0.0	0.0	0.0	0.0	0.0	0.0	0.0	0.0	0.0	0.0	0.0
GJA9	81025	symbol	H. sapiens	81025	H. sapiens	GJA9	gap junction protein alpha 9	GJA9 is a human gene that encodes for the gap junction protein alpha 9. This protein is involved in the formation of gap junctions, which are channels that directly connect the cytoplasms of adjacent cells. Each gap junction channel is formed by the docking of two hemichannels, each containing six connexin subunits. Gap junctions play a crucial role in intercellular communication and are involved…	Mutations in GJA9 have been associated with various diseases, including cataracts and hearing loss. In particular, mutations in GJA9 have been linked to autosomal dominant non-syndromic hearing loss (ADNSHL), a type of hearing loss that affects only the auditory system and is not associated with other symptoms. Targeted drug discovery efforts for GJA9 have focused on developing drugs that can mod…	GO:0007267 cell-cell signaling;GO:0055085 transmembrane transport;GO:0006810 transport							0.0	0.0	0.0	0.0	0.0	0.0	0.0	0.0	0.0	0.0	0.0	0.0	1.0	0.0	0.0	0.0	0.0	0.0	0.0	0.0
A_24_P169574						None	None	None	None	None	None	None	None	None	None	None	nan	nan	nan	nan	nan	nan	nan	nan	nan	nan	nan	nan	nan	nan	nan	nan	nan	nan	nan	nan
CHMP4B	128866	symbol	H. sapiens	128866	H. sapiens	CHMP4B	charged multivesicular body protein 4B	CHMP4B is a gene that belongs to the chromatin-modifying protein/charged multivesicular body protein (CHMP) family. It is involved in the endosomal sorting complex required for transport (ESCRT) complex III, which sorts endocytosed cell-surface receptors into multivesicular endosomes. CHMP4B also plays a role in the final stage of cytokinesis and the budding of enveloped viruses such as HIV-1. Th…	Mutations in the CHMP4B gene have been associated with autosomal dominant posterior polar cataracts, a type of cataract that affects the back of the lens. However, there are currently no targeted drug discovery efforts specifically for CHMP4B-related cataracts. In terms of drug discovery efforts related to CHMP4B, the focus has been on its role in HIV-1 budding. The HIV-1 Gag protein interacts wi…	GO:0090611 ubiquitin-independent protein catabolic process via the multivesicular body sorting pathway;GO:0036438 maintenance of lens transparency;GO:0051469 vesicle fusion with vacuole		Disease related genes; Human disease related genes:Nervous system diseases:Eye disease; Predicted intracellular proteins					0.0	0.0	0.0	0.0	0.0	1.0	0.0	0.0	0.0	1.0	0.0	0.0	0.0	0.0	0.0	0.0	0.0	0.0	0.0	0.0
C14orf132	56967	symbol	H. sapiens	56967	H. sapiens	C14orf132	chromosome 14 open reading frame 132	C14orf132 is a human gene located on chromosome 14 that is predicted to be an integral component of the membrane. The function of this gene is not yet fully understood, but it is believed to play a role in cellular processes related to the membrane. The gene has been identified as a potential target for further research into its role in human health and disease.	There is currently limited information available on the disease implications of C14orf132. However, some studies have suggested that mutations in this gene may be associated with certain types of cancer, including breast cancer and lung cancer. As a result, there is interest in exploring the potential of C14orf132 as a target for drug discovery efforts aimed at developing new treatments for these…								0.0	0.0	0.0	0.0	0.0	0.0	0.0	0.0	0.0	0.0	0.0	0.0	0.0	0.0	0.0	0.0	0.0	0.0	0.0	0.0
FAM118B	79607	symbol	H. sapiens	79607	H. sapiens	FAM118B	family with sequence similarity 118 member B	FAM118B is a human gene that is a member of the family with sequence similarity 118. It is predicted to be involved in Cajal body organization and is located in the Cajal body. FAM118B enables identical protein binding activity.	There is limited information available on the disease implications of FAM118B. However, recent studies have suggested that it may play a role in cancer progression and metastasis. Targeted drug discovery efforts for FAM118B are currently underway, with a focus on identifying small molecule inhibitors that can selectively target the protein. While there are currently no drugs on the market that sp…			Predicted intracellular proteins					0.0	0.0	0.0	0.0	0.0	0.0	0.0	0.0	0.0	0.0	0.0	0.0	0.0	0.0	0.0	0.0	0.0	0.0	0.0	0.0
EBP	10682	symbol	H. sapiens	10682	H. sapiens	EBP	EBP cholestenol delta-isomerase	EBP (cholestenol delta-isomerase) is a protein that is found in the endoplasmic reticulum and is involved in drug transport. It is a high affinity binding protein for certain drugs and shares structural features with bacterial and eukaryotic drug transporting proteins. EBP has four putative transmembrane segments and contains two conserved glutamate residues which may be involved in the transport…	Chondrodysplasia punctata 2 (CDPX2) is a rare genetic disorder caused by mutations in the EBP gene. This disorder is characterized by skeletal abnormalities, skin changes, and cataracts. There is currently no cure for CDPX2, and treatment is mainly supportive and symptomatic. However, targeted drug discovery efforts are underway to develop drugs that can modulate the activity of EBP and potential…	GO:0033489 cholesterol biosynthetic process via desmosterol;GO:0033490 cholesterol biosynthetic process via lathosterol;GO:0043931 ossification involved in bone maturation		ENZYME proteins:Isomerase; Human disease related genes:Congenital malformations:Congenital malformations of the musculoskeletal system; Potential drug targets; Human disease related genes:Congenital malformations:Other congenital malformations; Disease related genes; Enzymes	Endoplasmic reticulum;Nuclear membrane (Supported)	Tamoxifen	(M295)SIG PIP3 SIGNALING IN CARDIAC MYOCTES	(M5892)HALLMARK CHOLESTEROL HOMEOSTASIS; (M5902)HALLMARK APOPTOSIS; (M5924)HALLMARK MTORC1 SIGNALING	0.0	0.0	0.0	0.0	0.0	0.0	0.0	1.0	0.0	0.0	0.0	0.0	0.0	0.0	0.0	0.0	0.0	0.0	0.0	0.0
A_24_P605798						None	None	None	None	None	None	None	None	None	None	None	nan	nan	nan	nan	nan	nan	nan	nan	nan	nan	nan	nan	nan	nan	nan	nan	nan	nan	nan	nan
A_24_P272548						None	None	None	None	None	None	None	None	None	None	None	nan	nan	nan	nan	nan	nan	nan	nan	nan	nan	nan	nan	nan	nan	nan	nan	nan	nan	nan	nan
CFL1	1072	symbol	H. sapiens	1072	H. sapiens	CFL1	cofilin 1	Cofilin 1, also known as CFL1, is a human gene that encodes a protein involved in the regulation of the actin cytoskeleton. The protein can bind and depolymerize filamentous F-actin and inhibit the polymerization of monomeric G-actin in a pH-dependent manner. Increased phosphorylation of the protein by LIM kinase aids in Rho-induced reorganization of the actin cytoskeleton. Cofilin 1 is widely di…	Mutations in the CFL1 gene have been associated with various diseases, including Alzheimer's disease, breast cancer, and neurodegenerative disorders. Targeted drug discovery efforts have focused on developing drugs that can modulate the activity of cofilin 1 and its downstream signaling pathways. For example, small molecule inhibitors of LIM kinase, which phosphorylates and activates cofilin 1, h…	GO:0030043 actin filament fragmentation;GO:0030042 actin filament depolymerization;GO:0051014 actin filament severing		Predicted intracellular proteins	Plasma membrane (Approved)	Dodecyldimethylamine N-oxide; Copper; Artenimol	(M5060)SA FAS SIGNALING; (M1529)SA G1 AND S PHASES; (M16801)SIG REGULATION OF THE ACTIN CYTOSKELETON BY RHO GTPASES	(M5923)HALLMARK PI3K AKT MTOR SIGNALING	0.0	0.0	1.0	0.0	0.0	0.0	0.0	1.0	1.0	0.0	0.0	0.0	0.0	0.0	0.0	1.0	1.0	1.0	1.0	0.0
SRGAP3	9901	symbol	H. sapiens	9901	H. sapiens	SRGAP3	SLIT-ROBO Rho GTPase activating protein 3	SRGAP3 is a human gene that is predicted to have GTPase activator activity and be involved in negative regulation of cell migration. It is also predicted to be located in the cytosol and active in the cytoplasm. The gene is part of the SLIT-ROBO Rho GTPase activating protein family, which plays a role in regulating cell migration and axon guidance during development. While the exact function of S…	There is limited information available on the disease implications of SRGAP3. However, recent studies have suggested that mutations in the gene may be associated with neurodevelopmental disorders such as autism spectrum disorder and intellectual disability. Targeted drug discovery efforts for SRGAP3 are currently underway, with a focus on developing small molecule inhibitors that can modulate the…	GO:0051056 regulation of small GTPase mediated signal transduction;GO:0030336 negative regulation of cell migration;GO:2000146 negative regulation of cell motility		Disease related genes; Predicted intracellular proteins	Cytosol (Approved); Additional: Basal body;Centrosome				0.0	0.0	0.0	0.0	0.0	0.0	0.0	0.0	1.0	0.0	0.0	0.0	0.0	0.0	0.0	0.0	0.0	0.0	1.0	0.0
ZEB2	9839	symbol	H. sapiens	9839	H. sapiens	ZEB2	zinc finger E-box binding homeobox 2	ZEB2 is a gene that encodes a protein belonging to the Zfh1 family of zinc finger/homeodomain proteins. The protein is located in the nucleus and acts as a transcriptional repressor that binds to DNA and interacts with activated SMADs. Mutations in this gene have been linked to Hirschsprung disease/Mowat-Wilson syndrome. The gene has multiple alternatively spliced transcript variants.	Mutations in the ZEB2 gene have been linked to Hirschsprung disease/Mowat-Wilson syndrome, a rare genetic disorder characterized by developmental delay, intellectual disability, seizures, and multiple congenital anomalies. Targeted drug discovery efforts for this gene have focused on developing small molecule inhibitors that can modulate its activity and potentially treat associated diseases. How…	GO:1904330 positive regulation of myofibroblast contraction;GO:1903056 regulation of melanosome organization;GO:1904328 regulation of myofibroblast contraction		Disease related genes; Transcription factors:Helix-turn-helix domains; Predicted intracellular proteins; Human disease related genes:Congenital malformations:Other congenital malformations	Nucleoli;Nucleoplasm (Supported); Additional: Plasma membrane				0.0	0.0	0.0	0.0	0.0	0.0	0.0	0.0	0.0	0.0	0.0	0.0	0.0	0.0	0.0	0.0	0.0	1.0	1.0	0.0
MINK1	50488	symbol	H. sapiens	50488	H. sapiens	MINK1	misshapen like kinase 1	MINK1 is a gene that encodes a serine/threonine kinase belonging to the germinal center kinase family. It is structurally similar to kinases related to NIK and may belong to a distinct subfamily of NIK-related kinases within the GCK family. Studies of the mouse homolog suggest that MINK1 is up-regulated during postnatal cerebral development and activates the cJun N-terminal kinase and p38 pathway…	There is limited information available on the disease implications of MINK1. However, recent studies have suggested that MINK1 may play a role in the development and progression of certain types of cancer, including breast cancer and hepatocellular carcinoma. Targeted drug discovery efforts for MINK1 are still in the early stages, but there is potential for the development of small molecule inhib…	GO:2000311 regulation of AMPA receptor activity;GO:1900745 positive regulation of p38MAPK cascade;GO:0099601 regulation of neurotransmitter receptor activity	yes	Enzymes; Kinases:STE Ser/Thr protein kinases; Predicted intracellular proteins; ENZYME proteins:Transferases		Fostamatinib			0.0	1.0	1.0	1.0	0.0	0.0	0.0	1.0	0.0	0.0	0.0	1.0	0.0	0.0	0.0	0.0	0.0	1.0	0.0	0.0
AP2B1	163	symbol	H. sapiens	163	H. sapiens	AP2B1	adaptor related protein complex 2 subunit beta 1	AP2B1 is a human gene that encodes for a large chain component of the assembly protein complex 2. This protein is responsible for linking clathrin to receptors in coated vesicles and is found on the cytoplasmic face of coated vesicles in the plasma membrane. There are two transcript variants of this gene that encode for different isoforms.	Mutations in the AP2B1 gene have been associated with several diseases, including intellectual disability, autism spectrum disorder, and cancer. In particular, mutations in this gene have been linked to a subtype of X-linked intellectual disability known as NEDBEH syndrome. Additionally, dysregulation of AP2B1 expression has been observed in various types of cancer, including breast, lung, and pa…	GO:0098884 postsynaptic neurotransmitter receptor internalization;GO:0140239 postsynaptic endocytosis;GO:0099590 neurotransmitter receptor internalization		Predicted intracellular proteins; Transporters; Cancer-related genes:Candidate cancer biomarkers	Vesicles (Supported)			(M5910)HALLMARK PROTEIN SECRETION	0.0	0.0	0.0	0.0	0.0	0.0	0.0	0.0	0.0	1.0	1.0	0.0	0.0	0.0	0.0	0.0	1.0	0.0	0.0	0.0
PRICKLE2	166336	symbol	H. sapiens	166336	H. sapiens	PRICKLE2	prickle planar cell polarity protein 2	PRICKLE2 is a human gene that is similar to the prickle gene found in fruit flies. The exact function of PRICKLE2 is not yet fully understood, but studies in mice suggest that it may play a role in preventing seizures. Mutations in this gene have been linked to a type of epilepsy called progressive myoclonic epilepsy type 5.	Mutations in the PRICKLE2 gene have been linked to progressive myoclonic epilepsy type 5, a rare genetic disorder characterized by seizures, muscle twitching, and difficulty coordinating movements. Targeted drug discovery efforts for this condition are still in the early stages, but some potential therapeutic targets have been identified based on the underlying biology of the disease. For example…	GO:0060071 Wnt signaling pathway, planar cell polarity pathway;GO:0035567 non-canonical Wnt signaling pathway;GO:0016055 Wnt signaling pathway		Disease related genes; Predicted intracellular proteins	Golgi apparatus (Approved); Additional: Vesicles				0.0	0.0	0.0	0.0	0.0	0.0	0.0	0.0	0.0	0.0	0.0	0.0	0.0	0.0	0.0	0.0	0.0	0.0	0.0	0.0
UPF3A	65110	symbol	H. sapiens	65110	H. sapiens	UPF3A	UPF3A regulator of nonsense mediated mRNA decay	UPF3A is a human gene that encodes a protein involved in both mRNA nuclear export and mRNA surveillance. It is part of a post-splicing multiprotein complex and is one of two functional homologs to yeast Upf3p. The protein is involved in detecting exported mRNAs with truncated open reading frames and initiating nonsense-mediated mRNA decay (NMD). NMD degrades mRNAs containing premature stop codons…	Mutations in the UPF3A gene have been associated with several diseases, including intellectual disability, autism spectrum disorder, and cancer. In particular, UPF3A mutations have been found in patients with non-syndromic intellectual disability, suggesting a role in cognitive function. Targeted drug discovery efforts for UPF3A are still in the early stages, but the protein's involvement in mRNA…	GO:1905744 regulation of mRNA cis splicing, via spliceosome;GO:1905746 positive regulation of mRNA cis splicing, via spliceosome;GO:2000623 negative regulation of nuclear-transcribed mRNA catabolic process, nonsense-mediated decay		Predicted intracellular proteins	Nucleoplasm;Vesicles (Enhanced); Additional: Plasma membrane				0.0	0.0	0.0	0.0	0.0	0.0	0.0	0.0	0.0	0.0	0.0	0.0	0.0	0.0	0.0	0.0	0.0	0.0	0.0	0.0
A_24_P244495						None	None	None	None	None	None	None	None	None	None	None	nan	nan	nan	nan	nan	nan	nan	nan	nan	nan	nan	nan	nan	nan	nan	nan	nan	nan	nan	nan
A_24_P407704						None	None	None	None	None	None	None	None	None	None	None	nan	nan	nan	nan	nan	nan	nan	nan	nan	nan	nan	nan	nan	nan	nan	nan	nan	nan	nan	nan
TTC17	55761	symbol	H. sapiens	55761	H. sapiens	TTC17	tetratricopeptide repeat domain 17	TTC17 is a human gene that encodes for a protein with tetratricopeptide repeat domains. This protein is involved in actin filament polymerization and cilium organization, and is located in the actin cytoskeleton, cytosol, and plasma membrane. The function of TTC17 is important for maintaining the structure and function of cells, particularly in the formation and maintenance of cilia. Cilia are ha…	There is limited information available on targeted drug discovery efforts for TTC17, as it is primarily associated with ciliopathies, which are genetic disorders that are difficult to treat with traditional drug therapies. However, there are some drugs on the market that have been successful in treating symptoms associated with ciliopathies. For example, cystic fibrosis transmembrane conductance …	GO:0030041 actin filament polymerization;GO:0008154 actin polymerization or depolymerization;GO:0051258 protein polymerization		Predicted secreted proteins; Predicted intracellular proteins	Plasma membrane (Supported); Additional: Cytosol				0.0	0.0	0.0	0.0	0.0	0.0	0.0	0.0	0.0	0.0	0.0	0.0	0.0	0.0	0.0	0.0	0.0	1.0	0.0	0.0
AGAP2	116986	symbol	H. sapiens	116986	H. sapiens	AGAP2	ArfGAP with GTPase domain, ankyrin repeat and PH domain 2	AGAP2 is a human gene that belongs to the centaurin gamma-like family. It plays a role in mediating the anti-apoptotic effects of nerve growth factor by activating nuclear phosphoinositide 3-kinase. AGAP2 is overexpressed in cancer cells and promotes cancer cell invasion. The gene has multiple alternatively spliced transcript variants that encode different isoforms.	AGAP2 has been implicated in several diseases, including cancer, Alzheimer's disease, and schizophrenia. In cancer, AGAP2 overexpression has been linked to increased tumor growth and metastasis, making it a potential target for cancer therapy. Targeted drug discovery efforts have focused on developing inhibitors of AGAP2 activity, with some promising results in preclinical studies. However, there…	GO:0042177 negative regulation of protein catabolic process;GO:0043524 negative regulation of neuron apoptotic process;GO:0045860 positive regulation of protein kinase activity		Predicted intracellular proteins	Cytosol;Nucleoplasm (Supported); Additional: Midbody ring		(M108)PID NETRIN PATHWAY; (M271)PID PI3K PLC TRK PATHWAY		0.0	0.0	0.0	0.0	0.0	0.0	0.0	1.0	0.0	1.0	0.0	0.0	0.0	0.0	0.0	0.0	1.0	1.0	0.0	0.0
TMEM44	93109	symbol	H. sapiens	93109	H. sapiens	TMEM44	transmembrane protein 44	TMEM44 is a human gene that is predicted to be an integral component of the membrane. It encodes for a transmembrane protein, which means that it spans across the cell membrane. However, the exact function of TMEM44 is currently unknown. The gene is located on chromosome 1 and has been identified as a potential candidate gene for certain diseases, such as type 2 diabetes and obesity. Further rese…	There is limited information available on the disease implications of TMEM44, as its exact function is still unknown. However, studies have suggested that the gene may be involved in the development of type 2 diabetes and obesity. Targeted drug discovery efforts for these conditions may involve identifying small molecules that can modulate the activity of TMEM44 or its downstream signaling pathwa…			Predicted intracellular proteins	Cytosol (Approved)				0.0	0.0	0.0	0.0	0.0	0.0	0.0	0.0	0.0	0.0	0.0	0.0	0.0	0.0	0.0	0.0	0.0	0.0	0.0	0.0
YARS	8565	gene_synonym	H. sapiens	8565	H. sapiens	YARS1	tyrosyl-tRNA synthetase 1	YARS1, also known as tyrosyl-tRNA synthetase 1, is an aminoacyl-tRNA synthetase that catalyzes the aminoacylation of tRNA with tyrosine. This enzyme belongs to the class I tRNA synthetase family and is thought to be one of the first proteins to appear in evolution due to its central role in linking amino acids with nucleotide triplets contained in tRNAs. In addition to its catalytic function, YAR…	Mutations in the YARS1 gene have been associated with Charcot-Marie-Tooth disease, a group of inherited peripheral neuropathies that affect the motor and sensory nerves in the limbs. Specifically, YARS1 mutations have been linked to a subtype of the disease known as CMT type 1G, which is characterized by progressive muscle weakness and atrophy, as well as sensory loss and foot deformities. While …	GO:0006437 tyrosyl-tRNA aminoacylation;GO:0006418 tRNA aminoacylation for protein translation;GO:0043039 tRNA aminoacylation		Predicted intracellular proteins; Human disease related genes:Nervous system diseases:Neurodegenerative diseases; Potential drug targets; Disease related genes; ENZYME proteins:Ligase; Enzymes	Cytosol (Supported); Additional: Nuclear bodies	Tyrosine; Beta-(2-Naphthyl)-Alanine; Resveratrol; Tyrosinal; N6-ISOPENTENYL-ADENOSINE-5'-MONOPHOSPHATE; p-Benzoyl-L-phenylalanine; 4-(2,2,2-TRIFLUOROETHYL)-L-PHENYLALANINE			0.0	0.0	0.0	0.0	0.0	0.0	0.0	0.0	0.0	0.0	0.0	0.0	0.0	0.0	0.0	0.0	0.0	0.0	0.0	0.0
LOC100132161	100132678	Gene_ID	H. sapiens	100132678	H. sapiens	RPL7AP45	ribosomal protein L7a pseudogene 45										0.0	0.0	0.0	0.0	0.0	0.0	0.0	0.0	0.0	0.0	0.0	0.0	0.0	0.0	0.0	0.0	0.0	0.0	0.0	0.0
NCF1	653361	symbol	H. sapiens	653361	H. sapiens	NCF1	neutrophil cytosolic factor 1	NCF1 is a gene that encodes a 47 kDa cytosolic subunit of neutrophil NADPH oxidase, which is a multicomponent enzyme that produces superoxide anion. Mutations in this gene have been linked to chronic granulomatous disease, a rare genetic disorder that affects the immune system and causes recurrent infections.	Chronic granulomatous disease (CGD) is a rare genetic disorder that affects the immune system and causes recurrent infections. Mutations in the NCF1 gene have been linked to the development of CGD. The disease is characterized by the inability of neutrophils and other phagocytic cells to produce reactive oxygen species (ROS) due to a defect in the NADPH oxidase complex. This leads to an increased…	GO:0060264 regulation of respiratory burst involved in inflammatory response;GO:0071394 cellular response to testosterone stimulus;GO:1903409 reactive oxygen species biosynthetic process		Disease related genes; Human disease related genes:Immune system diseases:Primary immunodeficiency; Predicted intracellular proteins			(M278)PID RAC1 PATHWAY		0.0	0.0	0.0	0.0	0.0	1.0	0.0	1.0	1.0	0.0	0.0	0.0	0.0	0.0	0.0	0.0	0.0	0.0	0.0	0.0
NIPBL	25836	symbol	H. sapiens	25836	H. sapiens	NIPBL	NIPBL cohesin loading factor	The NIPBL gene is responsible for encoding a protein that plays a crucial role in sister chromatid cohesion, chromosome condensation, and DNA repair. It is homologous to a family of chromosomal adherins and has a bipartite nuclear targeting sequence and a putative HEAT repeat. Mutations in this gene lead to Cornelia de Lange syndrome, which is characterized by dysmorphic facial features, growth d…	Cornelia de Lange syndrome (CdLS) is a rare genetic disorder caused by mutations in the NIPBL gene. CdLS is characterized by a range of physical, cognitive, and behavioral abnormalities, including growth retardation, intellectual disability, limb abnormalities, and distinctive facial features. There is currently no cure for CdLS, and treatment is primarily supportive and symptomatic. However, the…	GO:0035261 external genitalia morphogenesis;GO:0061010 gallbladder development;GO:0034086 maintenance of sister chromatid cohesion		Disease related genes; Predicted intracellular proteins; Human disease related genes:Congenital malformations:Other congenital malformations	Nucleoplasm (Supported); Additional: Cytosol;Vesicles			(M5942)HALLMARK UV RESPONSE DN	0.0	1.0	0.0	0.0	0.0	0.0	0.0	0.0	0.0	0.0	0.0	0.0	1.0	1.0	0.0	0.0	0.0	0.0	0.0	0.0
LOC283904	400550	Gene_ID	H. sapiens	400550	H. sapiens	FENDRR	FOXF1 adjacent non-coding developmental regulatory RNA										0.0	0.0	0.0	0.0	0.0	0.0	0.0	0.0	0.0	0.0	0.0	0.0	0.0	0.0	0.0	0.0	0.0	0.0	0.0	0.0
CACNA1E	777	symbol	H. sapiens	777	H. sapiens	CACNA1E	calcium voltage-gated channel subunit alpha1 E	CACNA1E is a gene that encodes the alpha-1E subunit of R-type calcium channels, which are involved in the entry of calcium ions into excitable cells and various calcium-dependent processes. These channels are part of a complex consisting of alpha-1, alpha-2, beta, and delta subunits. The R-type calcium channels belong to the "high-voltage activated" group and may play a role in modulating the fir…	Mutations in the CACNA1E gene have been associated with a range of neurological disorders, including epilepsy, autism spectrum disorder, and intellectual disability. In particular, de novo mutations in CACNA1E have been identified in patients with developmental and epileptic encephalopathy, a severe form of epilepsy that is often resistant to treatment. Targeted drug discovery efforts for CACNA1E…	GO:0098703 calcium ion import across plasma membrane;GO:1902656 calcium ion import into cytosol;GO:0070509 calcium ion import		Human disease related genes:Nervous system diseases:Epilepsy; Predicted intracellular proteins; Voltage-gated ion channels:Voltage-Gated Calcium Channels; FDA approved drug targets:Small molecule drugs; Disease related genes	Plasma membrane (Approved); Additional: Actin filaments;Cytosol	Topiramate; Lamotrigine			0.0	0.0	0.0	1.0	0.0	0.0	0.0	1.0	0.0	0.0	1.0	0.0	1.0	0.0	0.0	0.0	0.0	0.0	0.0	0.0
A_23_P206568						None	None	None	None	None	None	None	None	None	None	None	nan	nan	nan	nan	nan	nan	nan	nan	nan	nan	nan	nan	nan	nan	nan	nan	nan	nan	nan	nan
FAM131A	131408	symbol	H. sapiens	131408	H. sapiens	FAM131A	family with sequence similarity 131 member A	FAM131A is a human gene that encodes for a protein belonging to the family with sequence similarity 131. The function of this protein is not yet fully understood, but it is believed to play a role in regulating cell growth and proliferation. Studies have shown that FAM131A expression is upregulated in certain types of cancer, suggesting that it may be involved in tumor development and progression…	There is limited information available on the disease implications and targeted drug discovery efforts for FAM131A. However, as mentioned earlier, mutations in the FAM131A gene have been associated with an increased risk of developing type 2 diabetes. This suggests that targeting FAM131A may be a potential therapeutic strategy for treating or preventing diabetes. Currently, there are no drugs on …			Predicted intracellular proteins	Nucleoli rim (Approved); Additional: Mitotic chromosome				0.0	0.0	0.0	0.0	0.0	0.0	0.0	0.0	0.0	0.0	0.0	0.0	0.0	0.0	0.0	0.0	0.0	0.0	0.0	0.0
LLPH	84298	symbol	H. sapiens	84298	H. sapiens	LLPH	LLP homolog, long-term synaptic facilitation factor	LLPH is a human gene that is predicted to be involved in dendrite extension and positive regulation of dendritic spine development. It enables RNA binding activity and is located in both the chromosome and nucleolus. The gene is a homolog of LLP, which is a long-term synaptic facilitation factor. While the exact function of LLPH is not yet fully understood, it is believed to play a role in the de…	Unfortunately, there is currently limited information available on the disease implications and targeted drug discovery efforts for LLPH. As the exact function of the gene is not yet fully understood, it is difficult to determine its potential role in disease development or progression. Additionally, there are no known drugs on the market that specifically target LLPH. However, further research i…	GO:0097484 dendrite extension;GO:0060999 positive regulation of dendritic spine development;GO:0060998 regulation of dendritic spine development		Predicted intracellular proteins	Nucleoli (Enhanced); Additional: Mitotic chromosome				0.0	0.0	1.0	0.0	0.0	0.0	0.0	0.0	0.0	0.0	0.0	0.0	0.0	0.0	0.0	0.0	0.0	0.0	0.0	0.0
MCTP1	79772	symbol	H. sapiens	79772	H. sapiens	MCTP1	multiple C2 and transmembrane domain containing 1	MCTP1 (multiple C2 and transmembrane domain containing 1) is a human gene that encodes a protein involved in calcium ion binding activity. It is predicted to play a role in several processes, including modulation of chemical synaptic transmission, negative regulation of endocytosis, and negative regulation of response to oxidative stress. MCTP1 is an integral component of the membrane.	There is limited information available on the disease implications of MCTP1. However, recent studies have suggested that MCTP1 may play a role in the pathogenesis of Alzheimer's disease. Specifically, MCTP1 has been found to be upregulated in the brains of Alzheimer's patients, and may contribute to the formation of amyloid plaques and neurofibrillary tangles. There are currently no targeted drug…	GO:1902883 negative regulation of response to oxidative stress;GO:1902882 regulation of response to oxidative stress;GO:0048168 regulation of neuronal synaptic plasticity		Predicted intracellular proteins	Golgi apparatus (Approved)				0.0	0.0	0.0	1.0	0.0	0.0	1.0	0.0	0.0	0.0	0.0	0.0	0.0	0.0	0.0	0.0	0.0	0.0	0.0	0.0
CLEC2D	29121	symbol	H. sapiens	29121	H. sapiens	CLEC2D	C-type lectin domain family 2 member D	CLEC2D is a gene that encodes a protein belonging to the natural killer cell receptor C-type lectin family. The protein is involved in inhibiting the formation of osteoclasts and contains a transmembrane domain near the N-terminus, as well as a C-type lectin-like extracellular domain. The gene has several alternatively spliced transcript variants.	There is limited information available on the disease implications of CLEC2D. However, some studies have suggested that the protein encoded by this gene may play a role in bone metabolism and osteoporosis. Targeted drug discovery efforts for CLEC2D are also limited, as the function of the protein is not well understood. There are currently no drugs on the market that specifically target CLEC2D. H…	GO:0007166 cell surface receptor signaling pathway;GO:0007165 signal transduction;GO:0023052 signaling		Predicted intracellular proteins	Golgi apparatus (Uncertain)		(M5880)NABA ECM AFFILIATED; (M5885)NABA MATRISOME ASSOCIATED; (M5889)NABA MATRISOME		0.0	0.0	0.0	0.0	0.0	0.0	0.0	0.0	0.0	0.0	0.0	0.0	0.0	0.0	0.0	0.0	0.0	0.0	0.0	0.0
13-Sep						None	None	None	None	None	None	None	None	None	None	None	nan	nan	nan	nan	nan	nan	nan	nan	nan	nan	nan	nan	nan	nan	nan	nan	nan	nan	nan	nan
A_24_P924651						None	None	None	None	None	None	None	None	None	None	None	nan	nan	nan	nan	nan	nan	nan	nan	nan	nan	nan	nan	nan	nan	nan	nan	nan	nan	nan	nan
RNASEH1	246243	symbol	H. sapiens	246243	H. sapiens	RNASEH1	ribonuclease H1	RNASEH1 is a gene that encodes an endonuclease, ribonuclease H1, which is responsible for degrading RNA in RNA-DNA hybrids. This gene plays a crucial role in DNA replication and repair. The gene has alternate isoforms that are directed to the mitochondria or the nucleus, depending on the initiation of the start codon. The production of the mitochondrial isoform is regulated by an upstream open re…	Mutations in the RNASEH1 gene have been associated with several diseases, including progressive external ophthalmoplegia with mitochondrial DNA deletions, autosomal recessive 2, and Aicardi-Goutieres syndrome. Targeted drug discovery efforts for RNASEH1 have focused on developing small molecule inhibitors that can selectively target the enzyme and inhibit its activity. However, there are currentl…	GO:0043137 DNA replication, removal of RNA primer;GO:0006401 RNA catabolic process;GO:0141188 nucleic acid catabolic process		Predicted intracellular proteins; Human disease related genes:Congenital disorders of metabolism:Mitochondrial diseases; Potential drug targets; Disease related genes; ENZYME proteins:Hydrolases; Enzymes	Cytosol;Nucleoplasm (Approved)				0.0	0.0	0.0	0.0	0.0	0.0	0.0	0.0	0.0	0.0	0.0	0.0	0.0	0.0	0.0	0.0	0.0	0.0	0.0	0.0
A_24_P263703						None	None	None	None	None	None	None	None	None	None	None	nan	nan	nan	nan	nan	nan	nan	nan	nan	nan	nan	nan	nan	nan	nan	nan	nan	nan	nan	nan
A_23_P71188						None	None	None	None	None	None	None	None	None	None	None	nan	nan	nan	nan	nan	nan	nan	nan	nan	nan	nan	nan	nan	nan	nan	nan	nan	nan	nan	nan
A_32_P6972						None	None	None	None	None	None	None	None	None	None	None	nan	nan	nan	nan	nan	nan	nan	nan	nan	nan	nan	nan	nan	nan	nan	nan	nan	nan	nan	nan
A_24_P463973						None	None	None	None	None	None	None	None	None	None	None	nan	nan	nan	nan	nan	nan	nan	nan	nan	nan	nan	nan	nan	nan	nan	nan	nan	nan	nan	nan
A_24_P50281						None	None	None	None	None	None	None	None	None	None	None	nan	nan	nan	nan	nan	nan	nan	nan	nan	nan	nan	nan	nan	nan	nan	nan	nan	nan	nan	nan
GNA11	2767	symbol	H. sapiens	2767	H. sapiens	GNA11	G protein subunit alpha 11	GNA11 is a human gene that encodes for the alpha subunit of a G protein, which is involved in various signaling systems across cell membranes. G proteins are composed of three units: alpha, beta, and gamma. Mutations in GNA11 have been linked to two conditions: hypocalciuric hypercalcemia type II (HHC2) and hypocalcemia dominant 2 (HYPOC2). Patients with HHC2 have decreased sensitivity to changes…	Mutations in GNA11 have been linked to hypocalciuric hypercalcemia type II (HHC2) and hypocalcemia dominant 2 (HYPOC2), both of which affect calcium regulation in the body. While there are currently no targeted drug discovery efforts specifically for GNA11, there are drugs on the market that can help manage the symptoms of these conditions. For example, patients with HHC2 may be prescribed calcim…	GO:0045634 regulation of melanocyte differentiation;GO:0007207 phospholipase C-activating G protein-coupled acetylcholine receptor signaling pathway;GO:0050932 regulation of pigment cell differentiation		Predicted intracellular proteins; Cancer-related genes; Transporters:Accessory Factors Involved in Transport; Potential drug targets; Disease related genes; Human disease related genes:Congenital disorders of metabolism:Congenital disorders of ion transport and metabolism			(M138)PID THROMBIN PAR4 PATHWAY; (M155)PID S1P META PATHWAY; (M268)PID S1P S1P2 PATHWAY		0.0	0.0	0.0	1.0	0.0	0.0	1.0	1.0	0.0	0.0	0.0	1.0	1.0	0.0	0.0	0.0	0.0	0.0	0.0	0.0
A_24_P66548						None	None	None	None	None	None	None	None	None	None	None	nan	nan	nan	nan	nan	nan	nan	nan	nan	nan	nan	nan	nan	nan	nan	nan	nan	nan	nan	nan
YY1AP1	55249	symbol	H. sapiens	55249	H. sapiens	YY1AP1	YY1 associated protein 1	YY1AP1 is a human gene that encodes a protein that is believed to interact with YY1 protein, although its precise function is not yet understood. The gene undergoes alternative splicing, resulting in the production of multiple transcript variants that encode different isoforms of the protein. The gene's function and potential role in human health and disease are still being studied.	There is limited information available on the disease implications of YY1AP1. However, some studies have suggested that it may play a role in cancer development and progression. For example, one study found that YY1AP1 expression was upregulated in breast cancer tissues and was associated with poor prognosis. Additionally, another study found that YY1AP1 was overexpressed in hepatocellular carcin…	GO:0008283 cell population proliferation;GO:0051726 regulation of cell cycle;GO:0030154 cell differentiation		Disease related genes; Predicted intracellular proteins; Human disease related genes:Congenital malformations:Other congenital malformations	Nucleoli fibrillar center (Approved)				0.0	0.0	0.0	0.0	0.0	0.0	0.0	0.0	0.0	0.0	0.0	0.0	0.0	0.0	0.0	0.0	0.0	0.0	0.0	0.0
ZNF608	57507	symbol	H. sapiens	57507	H. sapiens	ZNF608	zinc finger protein 608	ZNF608 is a human gene that encodes for a protein called zinc finger protein 608. This protein is predicted to have metal ion binding activity and to be involved in negative regulation of transcription by RNA polymerase II. It is also predicted to be active in the nucleus. Zinc finger proteins are known to play important roles in gene regulation and DNA binding. While the exact function of ZNF608…	There is limited information available on the disease implications of ZNF608. However, some studies have suggested that it may be involved in the development and progression of certain types of cancer, including breast cancer and glioblastoma. Targeted drug discovery efforts for ZNF608 are also limited, as its exact function and role in disease are not yet fully understood. Currently, there are n…	GO:0000122 negative regulation of transcription by RNA polymerase II;GO:0045892 negative regulation of DNA-templated transcription;GO:1902679 negative regulation of RNA biosynthetic process		Predicted intracellular proteins	Nucleoplasm (Approved); Additional: Mitochondria				0.0	0.0	0.0	0.0	0.0	0.0	0.0	0.0	0.0	0.0	0.0	0.0	0.0	0.0	0.0	0.0	0.0	0.0	0.0	0.0
KIAA1704	55425	gene_synonym	H. sapiens	55425	H. sapiens	GPALPP1	GPALPP motifs containing 1	GPALPP1 is a human gene that encodes a protein containing GPALPP motifs. These motifs are found in proteins that are involved in cell adhesion and migration, suggesting that GPALPP1 may play a role in these processes. However, the exact function of GPALPP1 is not yet fully understood. Studies have shown that GPALPP1 is expressed in various tissues, including the brain, heart, and skeletal muscle.…	There is limited information available on the disease implications of GPALPP1 and targeted drug discovery efforts. However, mutations in the GPALPP1 gene have been associated with certain types of cancer, such as breast and lung cancer. This suggests that GPALPP1 may be a potential target for cancer therapy. Currently, there are no drugs on the market that specifically target GPALPP1. However, th…			Predicted intracellular proteins	Nucleoli rim (Approved); Additional: Nucleoplasm				0.0	0.0	0.0	0.0	0.0	0.0	0.0	0.0	0.0	0.0	0.0	0.0	0.0	0.0	0.0	0.0	0.0	0.0	0.0	0.0
A_24_P323885						None	None	None	None	None	None	None	None	None	None	None	nan	nan	nan	nan	nan	nan	nan	nan	nan	nan	nan	nan	nan	nan	nan	nan	nan	nan	nan	nan
CUST_3186_PI416261804						None	None	None	None	None	None	None	None	None	None	None	nan	nan	nan	nan	nan	nan	nan	nan	nan	nan	nan	nan	nan	nan	nan	nan	nan	nan	nan	nan
A_24_P255865						None	None	None	None	None	None	None	None	None	None	None	nan	nan	nan	nan	nan	nan	nan	nan	nan	nan	nan	nan	nan	nan	nan	nan	nan	nan	nan	nan
NOVA2	4858	symbol	H. sapiens	4858	H. sapiens	NOVA2	NOVA alternative splicing regulator 2	NOVA2 is a human gene that encodes for a protein called NOVA alternative splicing regulator 2. This protein is involved in regulating alternative mRNA splicing, which is the process by which different versions of a gene can be produced from the same DNA sequence. NOVA2 is also involved in neuron differentiation, which is the process by which neurons develop from precursor cells. The protein is pr…	Mutations in the NOVA2 gene have been associated with several neurological disorders, including autism spectrum disorder, schizophrenia, and epilepsy. In particular, NOVA2 has been shown to be involved in the regulation of the alternative splicing of genes that are important for synaptic function and neuronal development. As a result, there is growing interest in developing drugs that target NOVA…	GO:1902667 regulation of axon guidance;GO:0120163 negative regulation of cold-induced thermogenesis;GO:0000381 regulation of alternative mRNA splicing, via spliceosome		Disease related genes; Human disease related genes:Congenital malformations:Congenital malformations of the nervous system; Predicted intracellular proteins	Golgi apparatus (Approved); Additional: Nuclear bodies;Nucleoplasm				0.0	0.0	1.0	0.0	0.0	0.0	0.0	0.0	0.0	0.0	0.0	0.0	0.0	0.0	0.0	0.0	0.0	0.0	0.0	0.0
BCAS4	55653	symbol	H. sapiens	55653	H. sapiens	BCAS4	breast carcinoma amplified sequence 4	The human gene BCAS4, also known as breast carcinoma amplified sequence 4, is predicted to be part of the BLOC-1 complex. This information is provided by the Alliance of Genome Resources as of April 2022. The BLOC-1 complex is a protein complex involved in the biogenesis of lysosome-related organelles, which are specialized compartments within cells that are involved in processes such as pigment …	While the exact role of BCAS4 in breast cancer is not yet fully understood, its amplification has been observed in some breast tumors, suggesting a potential role in the development or progression of the disease. Targeted drug discovery efforts for BCAS4 are currently limited, as its specific function within the BLOC-1 complex is not yet fully characterized. However, there are several drugs on th…			Disease related genes; Predicted intracellular proteins	Cytosol;Intermediate filaments (Approved)				0.0	0.0	0.0	0.0	0.0	0.0	0.0	0.0	0.0	0.0	0.0	0.0	0.0	0.0	0.0	0.0	0.0	0.0	0.0	0.0
LOC729020	729020	Gene_ID	H. sapiens	729020	H. sapiens	RPEL1	ribulose-5-phosphate-3-epimerase like 1	RPEL1 is a human gene that is predicted to have metal ion binding activity and ribulose-phosphate 3-epimerase activity. It is also predicted to be involved in cellular carbohydrate metabolic process, pentose catabolic process, and pentose-phosphate shunt, non-oxidative branch. RPEL1 is expected to be active in the cytosol.	There is limited information available on the disease implications of RPEL1. However, recent studies have suggested that RPEL1 may play a role in the development and progression of certain types of cancer, including breast cancer and hepatocellular carcinoma. Targeted drug discovery efforts for RPEL1 are currently underway, with a focus on identifying small molecule inhibitors that can selectivel…	GO:0009052 pentose-phosphate shunt, non-oxidative branch;GO:0019682 glyceraldehyde-3-phosphate metabolic process;GO:0006098 pentose-phosphate shunt		Enzymes; ENZYME proteins:Isomerase; Predicted intracellular proteins	Cytosol (Approved); Additional: Nucleoplasm;Plasma membrane				0.0	0.0	0.0	0.0	0.0	0.0	0.0	0.0	0.0	0.0	0.0	0.0	0.0	0.0	1.0	0.0	0.0	0.0	0.0	0.0
NEDD4L	23327	symbol	H. sapiens	23327	H. sapiens	NEDD4L	NEDD4 like E3 ubiquitin protein ligase	NEDD4L is a gene that encodes a type of protein called HECT domain E3 ubiquitin ligase, which transfers ubiquitin from E2 ubiquitin-conjugating enzymes to specific protein substrates, leading to their degradation. This protein plays a crucial role in regulating the cell surface expression of the epithelial sodium channel, ENaC, and is involved in epithelial sodium transport. NEDD4L is also associ…	NEDD4L has been implicated in several diseases, including hypertension, autism spectrum disorder, and cancer. In hypertension, NEDD4L regulates the expression of ENaC, which plays a crucial role in sodium transport in the kidney. Certain single nucleotide polymorphisms in NEDD4L have been associated with essential hypertension, suggesting that the gene may be a potential therapeutic target for th…	GO:1903782 regulation of sodium ion import across plasma membrane;GO:1903783 negative regulation of sodium ion import across plasma membrane;GO:2001288 positive regulation of caveolin-mediated endocytosis		Predicted intracellular proteins; Human disease related genes:Congenital malformations:Congenital malformations of the nervous system; ENZYME proteins:Transferases; Potential drug targets; Disease related genes; Enzymes; Cancer-related genes:Mutational cancer driver genes			(M286)PID TGFBR PATHWAY; (M187)PID TRKR PATHWAY; (M19)PID P73PATHWAY	(M5891)HALLMARK HYPOXIA	1.0	0.0	1.0	0.0	0.0	0.0	0.0	0.0	0.0	1.0	0.0	1.0	0.0	0.0	0.0	0.0	0.0	1.0	0.0	0.0
GIT2	9815	symbol	H. sapiens	9815	H. sapiens	GIT2	GIT ArfGAP 2	The GIT2 gene belongs to the GIT protein family and encodes a protein that interacts with G protein-coupled receptor kinases and possesses ADP-ribosylation factor (ARF) GTPase-activating protein (GAP) activity. GIT proteins regulate cytoskeletal dynamics, participate in receptor internalization and membrane trafficking, and are involved in cell motility. The GIT2 protein represses lamellipodial e…	Research on the GIT2 gene has implicated it in several diseases, including cancer, neurological disorders, and cardiovascular diseases. In cancer, GIT2 has been shown to play a role in tumor growth and metastasis, making it a potential target for cancer therapy. In neurological disorders, GIT2 has been linked to autism spectrum disorders and schizophrenia, suggesting a potential role in the regul…	GO:0032012 regulation of ARF protein signal transduction;GO:0036465 synaptic vesicle recycling;GO:0099504 synaptic vesicle cycle		Predicted intracellular proteins	Microtubules (Approved)		(M71)PID ILK PATHWAY; (M281)PID FAK PATHWAY		0.0	1.0	0.0	0.0	0.0	0.0	0.0	1.0	0.0	1.0	0.0	0.0	0.0	0.0	0.0	0.0	0.0	0.0	0.0	0.0
RERE	473	symbol	H. sapiens	473	H. sapiens	RERE	arginine-glutamic acid dipeptide repeats	The human gene RERE belongs to the atrophin family of proteins and contains arginine-glutamic acid (RE) dipeptide repeats. The protein encoded by this gene is found in the nucleus and is known to trigger apoptosis when overexpressed. In mice, a similar protein is believed to function as a transcriptional co-repressor during embryonic development by associating with histone deacetylase. Multiple t…	Research on the RERE gene and its potential disease implications is still ongoing. However, some studies have suggested that mutations in this gene may be associated with intellectual disability, autism spectrum disorder, and congenital heart defects. Targeted drug discovery efforts for RERE are currently limited, as the exact role of this gene in disease development is not yet fully understood. …	GO:0021691 cerebellar Purkinje cell layer maturation;GO:0021590 cerebellum maturation;GO:0021699 cerebellar cortex maturation		Predicted intracellular proteins; Transcription factors:Helix-turn-helix domains; Human disease related genes:Congenital malformations:Congenital malformations of the nervous system; Disease related genes; Transcription factors:Zinc-coordinating DNA-binding domains	Nuclear bodies (Supported); Additional: Nucleoplasm				0.0	1.0	1.0	0.0	0.0	0.0	0.0	0.0	0.0	0.0	0.0	0.0	0.0	0.0	0.0	0.0	0.0	0.0	0.0	0.0
ANK3	288	symbol	H. sapiens	288	H. sapiens	ANK3	ankyrin 3	ANK3, also known as ankyrin 3, is a gene that encodes for a protein belonging to the ankyrin family. Ankyrins are believed to play important roles in linking integral membrane proteins to the underlying cytoskeleton and are involved in various cellular activities such as motility, activation, and proliferation. ANK3 is expressed in a tissue-specific and developmentally regulated manner and has mu…	Mutations in the ANK3 gene have been associated with several neuropsychiatric disorders, including bipolar disorder, schizophrenia, and autism spectrum disorder. These mutations are thought to disrupt the normal functioning of the protein and alter the structure of the axonal initial segment, leading to abnormal neuronal excitability and synaptic transmission. As a result, ANK3 has become a targe…	GO:1900827 positive regulation of membrane depolarization during cardiac muscle cell action potential;GO:0072658 maintenance of protein location in membrane;GO:0072660 maintenance of protein location in plasma membrane		Predicted intracellular proteins; Human disease related genes:Other diseases:Mental and behavioural disorders; Transporters:Accessory Factors Involved in Transport; Potential drug targets; Disease related genes; Cancer-related genes:Mutated cancer genes	Plasma membrane (Supported)				1.0	0.0	1.0	0.0	0.0	1.0	1.0	1.0	0.0	0.0	0.0	1.0	0.0	0.0	0.0	0.0	0.0	0.0	0.0	0.0
PSPC1	55269	symbol	H. sapiens	55269	H. sapiens	PSPC1	paraspeckle component 1	PSPC1, or paraspeckle component 1, is a gene that encodes a nucleolar protein found in paraspeckles, which are subnuclear structures located near splicing speckles. Paraspeckles are composed of RNA-protein structures that include a non-coding RNA, NEAT1/Men epsilon/beta, and the Drosophila Behavior Human Splicing family of proteins. PSPC1 is involved in the control of gene expression via an RNA n…	There is limited information available on the disease implications of PSPC1. However, recent studies have suggested that PSPC1 may play a role in the development and progression of certain cancers, including breast cancer and hepatocellular carcinoma. Targeted drug discovery efforts for PSPC1 are currently underway, with a focus on identifying small molecule inhibitors that can selectively target…	GO:0042752 regulation of circadian rhythm;GO:0002218 activation of innate immune response;GO:0048511 rhythmic process		Transcription factors:Yet undefined DNA-binding domains; Predicted intracellular proteins	Nucleoplasm (Enhanced); Additional: Nucleoli fibrillar center				0.0	0.0	0.0	0.0	0.0	0.0	0.0	0.0	0.0	0.0	0.0	0.0	0.0	0.0	0.0	0.0	0.0	0.0	0.0	0.0
POLR2J	5439	symbol	H. sapiens	5439	H. sapiens	POLR2J	RNA polymerase II subunit J	POLR2J is a gene that encodes a subunit of RNA polymerase II, which is responsible for synthesizing messenger RNA in eukaryotes. The product of this gene forms a core subassembly unit of the polymerase, existing as a heterodimer with another polymerase subunit. There are two similar genes located nearby on chromosome 7q22.1 and a pseudogene is found on chromosome 7p13.	There is limited information available on the disease implications of POLR2J. However, research has shown that mutations in other subunits of RNA polymerase II can lead to various diseases, including cancer and developmental disorders. As for targeted drug discovery efforts, there are currently no drugs specifically targeting POLR2J. However, there are drugs that target RNA polymerase II as a who…	GO:0006366 transcription by RNA polymerase II;GO:0006351 DNA-templated transcription;GO:0032774 RNA biosynthetic process		RNA polymerase related proteins; Predicted intracellular proteins	Nucleoplasm (Approved)			(M5898)HALLMARK DNA REPAIR	0.0	0.0	0.0	0.0	0.0	0.0	0.0	1.0	0.0	0.0	0.0	0.0	0.0	0.0	0.0	0.0	0.0	0.0	0.0	0.0
ZNF432	9668	symbol	H. sapiens	9668	H. sapiens	ZNF432	zinc finger protein 432	ZNF432 is a human gene that encodes for a zinc finger protein 432. This protein is predicted to have the ability to bind to DNA and regulate transcription by RNA polymerase II. It is specifically predicted to have RNA polymerase II-specific and RNA polymerase II cis-regulatory region sequence-specific DNA binding activity. ZNF432 is located in the nucleoplasm, which is the fluid inside the nucleu…	Unfortunately, there is currently limited information available on the disease implications and targeted drug discovery efforts for ZNF432. As a relatively newly discovered gene, research on its potential role in disease is still ongoing. However, there are no known drugs on the market that specifically target ZNF432. It is possible that in the future, as more is learned about the gene and its fu…	GO:0006974 DNA damage response;GO:0033554 cellular response to stress;GO:0006950 response to stress		Transcription factors:Zinc-coordinating DNA-binding domains; Predicted intracellular proteins	Nucleoplasm (Enhanced)				0.0	0.0	0.0	0.0	0.0	0.0	0.0	0.0	0.0	0.0	0.0	0.0	0.0	0.0	0.0	0.0	0.0	0.0	0.0	0.0
PDE4DIP	9659	symbol	H. sapiens	9659	H. sapiens	PDE4DIP	phosphodiesterase 4D interacting protein	PDE4DIP is a gene that encodes a protein responsible for anchoring phosphodiesterase 4D to the Golgi/centrosome region of the cell. This gene has several transcript variants that encode different isoforms. Defects in this gene may be a cause of myeloproliferative disorder (MBD) associated with eosinophilia.	Mutations in the PDE4DIP gene have been associated with several diseases, including myeloproliferative disorder (MBD) associated with eosinophilia, which is a rare blood disorder characterized by the overproduction of eosinophils. Targeted drug discovery efforts have focused on developing drugs that can inhibit the activity of phosphodiesterase 4D, which is anchored by the PDE4DIP protein. Severa…	GO:0090063 positive regulation of microtubule nucleation;GO:0030953 astral microtubule organization;GO:1903358 regulation of Golgi organization		Disease related genes; Cancer-related genes; Predicted intracellular proteins	Golgi apparatus (Supported)			(M5909)HALLMARK MYOGENESIS	0.0	0.0	0.0	0.0	0.0	0.0	0.0	0.0	0.0	0.0	0.0	0.0	0.0	0.0	0.0	0.0	0.0	1.0	0.0	0.0
NR2C1	7181	symbol	H. sapiens	7181	H. sapiens	NR2C1	nuclear receptor subfamily 2 group C member 1	NR2C1 is a gene that encodes a nuclear hormone receptor with a DNA binding domain, a hinge region, and a ligand binding domain. It belongs to a family of transcription factors that regulate gene expression by binding to specific DNA sequences in target gene promoters. The gene has multiple alternatively spliced transcript variants, but the full-length nature of some of these variants is unknown.	NR2C1 has been implicated in various diseases, including cancer, neurological disorders, and metabolic disorders. In cancer, NR2C1 has been shown to promote tumor growth and metastasis, making it a potential target for cancer therapy. In neurological disorders, NR2C1 has been linked to neurodegeneration and cognitive impairment, suggesting a role in the pathogenesis of these diseases. In metaboli…	GO:0048386 positive regulation of retinoic acid receptor signaling pathway;GO:0048385 regulation of retinoic acid receptor signaling pathway;GO:0043401 steroid hormone receptor signaling pathway		Transcription factors:Zinc-coordinating DNA-binding domains; Nuclear receptors; Predicted intracellular proteins	Nucleoplasm (Supported); Additional: Cell Junctions;Cytosol		(M151)PID AR TF PATHWAY; (M101)PID HDAC CLASSI PATHWAY		0.0	0.0	0.0	0.0	0.0	0.0	0.0	1.0	0.0	0.0	0.0	0.0	0.0	0.0	0.0	0.0	0.0	0.0	0.0	0.0
SPHK1	8877	symbol	H. sapiens	8877	H. sapiens	SPHK1	sphingosine kinase 1	SPHK1, or sphingosine kinase 1, is a gene that encodes a protein responsible for catalyzing the phosphorylation of sphingosine to form sphingosine-1-phosphate (S1P). S1P is a lipid mediator that has both intra- and extracellular functions, regulating proliferation and survival intracellularly and acting as a ligand for cell surface G protein-coupled receptors extracellularly. SPHK1 and S1P play a…	SPHK1 has been implicated in various diseases, including cancer, inflammation, and autoimmune disorders. In cancer, SPHK1 is overexpressed and promotes tumor growth, invasion, and metastasis. Therefore, targeting SPHK1 has emerged as a potential therapeutic strategy for cancer treatment. Several small molecule inhibitors of SPHK1 have been developed and tested in preclinical studies, showing prom…	GO:0046521 sphingoid catabolic process;GO:1905364 regulation of endosomal vesicle fusion;GO:1900060 negative regulation of ceramide biosynthetic process	yes	Enzymes; Predicted intracellular proteins; ENZYME proteins:Transferases	Plasma membrane;Vesicles (Supported); Additional: Primary cilium;Primary cilium transition zone		(M103)PID S1P S1P1 PATHWAY; (M155)PID S1P META PATHWAY; (M53)PID INTEGRIN3 PATHWAY	(M5890)HALLMARK TNFA SIGNALING VIA NFKB; (M5909)HALLMARK MYOGENESIS; (M5932)HALLMARK INFLAMMATORY RESPONSE	0.0	1.0	0.0	0.0	0.0	0.0	0.0	1.0	0.0	0.0	0.0	0.0	1.0	0.0	0.0	0.0	0.0	0.0	0.0	0.0
ZNF701	55762	symbol	H. sapiens	55762	H. sapiens	ZNF701	zinc finger protein 701	ZNF701 is a human gene that encodes for a zinc finger protein. This protein is predicted to have the ability to bind to DNA and regulate transcription by RNA polymerase II. It is also predicted to be active in the nucleus. The function of ZNF701 is not yet fully understood, but it is believed to play a role in the regulation of gene expression.	There is limited information available on the disease implications of ZNF701. However, some studies have suggested that mutations in this gene may be associated with certain types of cancer, including breast cancer and lung cancer. Targeted drug discovery efforts for ZNF701 are also limited, as its function is not yet fully understood. However, some studies have suggested that targeting zinc fing…	GO:0006357 regulation of transcription by RNA polymerase II;GO:0006355 regulation of DNA-templated transcription;GO:2001141 regulation of RNA biosynthetic process		Transcription factors:Zinc-coordinating DNA-binding domains; Predicted intracellular proteins	Nucleoplasm (Approved); Additional: Centriolar satellite				0.0	0.0	0.0	0.0	0.0	0.0	0.0	0.0	0.0	0.0	0.0	0.0	0.0	0.0	0.0	0.0	0.0	0.0	0.0	0.0
INCA1	388324	symbol	H. sapiens	388324	H. sapiens	INCA1	inhibitor of CDK, cyclin A1 interacting protein 1	INCA1 is a human gene that encodes a protein that interacts with cyclin A1 and inhibits the activity of cyclin-dependent protein serine/threonine kinases. The protein has cyclin binding activity, inhibitor activity, and identical protein binding activity. It is involved in negative regulation of cyclin-dependent protein serine/threonine kinase activity and is located in the cytoplasm and nuclear …	There is limited information available on the disease implications of INCA1. However, some studies have suggested that alterations in the expression of INCA1 may be associated with certain types of cancer, including breast cancer and hepatocellular carcinoma. Targeted drug discovery efforts for INCA1 are also limited, but some studies have explored the potential of INCA1 as a therapeutic target f…	GO:0045736 negative regulation of cyclin-dependent protein serine/threonine kinase activity;GO:1904030 negative regulation of cyclin-dependent protein kinase activity;GO:0048147 negative regulation of fibroblast proliferation		Predicted intracellular proteins	Nuclear bodies;Nucleoplasm (Approved)				0.0	0.0	0.0	0.0	0.0	0.0	0.0	0.0	0.0	0.0	0.0	0.0	0.0	0.0	0.0	0.0	0.0	0.0	0.0	0.0
SAP30BP	29115	symbol	H. sapiens	29115	H. sapiens	SAP30BP	SAP30 binding protein	SAP30 binding protein (SAP30BP) is a human gene that plays a role in regulating gene expression by interacting with histone deacetylases. It is involved in the modulation of symbiont transcription, positive regulation of histone deacetylation, and response to viruses. SAP30BP is located in the intermediate filament cytoskeleton and nucleoplasm. Its exact function and mechanism of action are still…	There is limited information available on the disease implications of SAP30 binding protein (SAP30BP). However, some studies have suggested that it may play a role in cancer progression and metastasis. Targeted drug discovery efforts for SAP30BP are also limited, as its exact function and mechanism of action are still being studied. Currently, there are no drugs on the market that specifically ta…	GO:0052472 modulation by host of symbiont transcription;GO:0051851 modulation by host of symbiont process;GO:0051702 biological process involved in interaction with symbiont		Predicted intracellular proteins	Nucleoplasm (Enhanced)				0.0	0.0	0.0	0.0	0.0	0.0	0.0	0.0	0.0	0.0	0.0	0.0	0.0	0.0	0.0	0.0	0.0	0.0	0.0	0.0
PMS2L5	5383	gene_synonym	H. sapiens	5383	H. sapiens	PMS2P5	PMS1 homolog 2, mismatch repair system component pseudogene 5			GO:0006298 mismatch repair;GO:0006281 DNA repair;GO:0006259 DNA metabolic process							0.0	0.0	0.0	0.0	0.0	0.0	0.0	0.0	0.0	0.0	0.0	0.0	0.0	0.0	0.0	0.0	0.0	0.0	0.0	0.0
SMARCA1	6594	symbol	H. sapiens	6594	H. sapiens	SMARCA1	SNF2 related chromatin remodeling ATPase 1	SMARCA1 is a gene that belongs to the SWI/SNF family of proteins. It encodes an ATPase that is expressed in various tissues and contributes to the chromatin remodeling complex, which is involved in transcription. The gene may also play a role in DNA damage, growth inhibition, and apoptosis of cancer cells. Alternative splicing of the gene results in multiple transcript variants.	Mutations in the SMARCA1 gene have been associated with Coffin-Siris syndrome, a rare genetic disorder characterized by developmental delay, intellectual disability, and distinctive physical features. Additionally, SMARCA1 has been implicated in various types of cancer, including breast, lung, and ovarian cancer. Targeted drug discovery efforts have focused on developing inhibitors of the ATPase …	GO:0031507 heterochromatin formation;GO:0045814 negative regulation of gene expression, epigenetic;GO:0040029 epigenetic regulation of gene expression		Transcription factors:Helix-turn-helix domains; Predicted intracellular proteins	Nucleoplasm (Supported); Additional: Vesicles				0.0	1.0	0.0	0.0	0.0	0.0	0.0	0.0	0.0	0.0	0.0	0.0	0.0	0.0	0.0	0.0	0.0	0.0	0.0	0.0
EPN2	22905	symbol	H. sapiens	22905	H. sapiens	EPN2	epsin 2	EPN2, also known as epsin 2, is a gene that encodes a protein that interacts with clathrin and adaptor-related protein complex 2, alpha 1 subunit. The protein is found in a brain-derived clathrin-coated vesicle fraction and is involved in clathrin-mediated endocytosis. It localizes to the peri-Golgi region and the cell periphery. The gene undergoes alternate splicing, resulting in multiple transc…	Research on EPN2 has primarily focused on its role in clathrin-mediated endocytosis and its involvement in various cellular processes. However, there is limited information available on the disease implications of EPN2 mutations or dysregulation. As of now, there are no targeted drug discovery efforts specifically aimed at EPN2. However, drugs that target clathrin-mediated endocytosis, such as dy…	GO:0030948 negative regulation of vascular endothelial growth factor receptor signaling pathway;GO:1903671 negative regulation of sprouting angiogenesis;GO:0030947 regulation of vascular endothelial growth factor receptor signaling pathway		Predicted intracellular proteins	Vesicles (Supported)				0.0	0.0	0.0	0.0	0.0	0.0	0.0	0.0	0.0	1.0	0.0	0.0	0.0	0.0	0.0	0.0	0.0	0.0	0.0	0.0
A_24_P640212						None	None	None	None	None	None	None	None	None	None	None	nan	nan	nan	nan	nan	nan	nan	nan	nan	nan	nan	nan	nan	nan	nan	nan	nan	nan	nan	nan
CACNA1A	773	symbol	H. sapiens	773	H. sapiens	CACNA1A	calcium voltage-gated channel subunit alpha1 A	CACNA1A is a gene that encodes the alpha-1A subunit of voltage-dependent calcium channels, which are involved in various calcium-dependent processes in excitable cells. The alpha-1 subunit is responsible for directing channel activity, while other subunits act as auxiliary regulators. CACNA1A is primarily expressed in neuronal tissue and exhibits polymorphic variation due to (CAG)n-repeats. Mutat…	Mutations in the CACNA1A gene have been linked to several neurological disorders, including familial hemiplegic migraine (FHM) and episodic ataxia type 2 (EA2). FHM is a rare form of migraine that is inherited in an autosomal dominant manner and is characterized by severe headache, hemiparesis, and other neurological symptoms. EA2 is a rare disorder that causes episodes of ataxia, vertigo, and mi…	GO:0098703 calcium ion import across plasma membrane;GO:1902656 calcium ion import into cytosol;GO:0070509 calcium ion import		Human disease related genes:Nervous system diseases:Epilepsy; Human disease related genes:Nervous system diseases:Other nervous and sensory system diseases; Predicted intracellular proteins; Human disease related genes:Nervous system diseases:Neurodegenerative diseases; Voltage-gated ion channels:Voltage-Gated Calcium Channels; FDA approved drug targets:Small molecule drugs; Disease related genes…	Endoplasmic reticulum (Uncertain)	Verapamil; Loperamide; Bepridil; Ziconotide; Dotarizine; Bioallethrin		(M5942)HALLMARK UV RESPONSE DN	0.0	0.0	0.0	1.0	0.0	0.0	0.0	1.0	0.0	0.0	1.0	0.0	1.0	0.0	0.0	0.0	0.0	0.0	0.0	0.0
A_23_P213350						None	None	None	None	None	None	None	None	None	None	None	nan	nan	nan	nan	nan	nan	nan	nan	nan	nan	nan	nan	nan	nan	nan	nan	nan	nan	nan	nan
FAM153A	285596	symbol	H. sapiens	285596	H. sapiens	FAM153A	family with sequence similarity 153 member A	FAM153A is a human gene that encodes for a protein belonging to the family with sequence similarity 153. The function of this protein is not yet fully understood, but it is believed to play a role in cellular processes such as cell division and differentiation. Mutations in this gene have been associated with certain types of cancer, including breast and ovarian cancer. Further research is needed…	There is limited information available on the disease implications of FAM153A, but mutations in this gene have been associated with certain types of cancer, including breast and ovarian cancer. Targeted drug discovery efforts for FAM153A are currently underway, with a focus on developing drugs that can inhibit the activity of the protein encoded by this gene. However, there are currently no drugs…			Predicted intracellular proteins					0.0	0.0	0.0	0.0	0.0	0.0	0.0	0.0	0.0	0.0	0.0	0.0	0.0	0.0	0.0	0.0	0.0	0.0	0.0	0.0
ZNF451	26036	symbol	H. sapiens	26036	H. sapiens	ZNF451	zinc finger protein 451	ZNF451 is a human gene that encodes for a zinc finger protein. This protein is involved in various cellular processes, including SUMO ligase activity and transcription corepressor activity. It plays a role in negative regulation of nitrogen compound metabolic process, negative regulation of transforming growth factor beta receptor signaling pathway, and protein sumoylation. ZNF451 is located in t…	There is limited information available on the disease implications of ZNF451. However, some studies have suggested that it may be involved in the development and progression of certain cancers, including breast cancer and hepatocellular carcinoma. Targeted drug discovery efforts for ZNF451 are also limited, as its exact role in disease pathogenesis is not well understood. Currently, there are no …	GO:0060633 negative regulation of transcription initiation by RNA polymerase II;GO:2000143 negative regulation of DNA-templated transcription initiation;GO:0016925 protein sumoylation		Transcription factors:Zinc-coordinating DNA-binding domains; Predicted intracellular proteins	Nucleoplasm (Approved)				0.0	0.0	0.0	0.0	0.0	0.0	0.0	0.0	0.0	0.0	0.0	0.0	0.0	0.0	0.0	0.0	0.0	0.0	0.0	0.0
RBM9	23543	gene_synonym	H. sapiens	23543	H. sapiens	RBFOX2	RNA binding fox-1 homolog 2	RBFOX2 is a human gene that encodes an RNA binding protein that regulates alternative exon splicing in the nervous system and other cell types. The protein binds to a conserved UGCAUG element found downstream of many alternatively spliced exons and promotes inclusion of the alternative exon in mature transcripts. RBFOX2 also interacts with the estrogen receptor 1 transcription factor and regulate…	RBFOX2 has been implicated in several diseases, including cancer, autism spectrum disorder, and neurodegenerative disorders such as Alzheimer's disease and amyotrophic lateral sclerosis (ALS). In cancer, RBFOX2 has been shown to promote tumor growth and metastasis in several types of cancer, including breast, lung, and pancreatic cancer. In neurodegenerative disorders, RBFOX2 dysregulation has be…	GO:0030520 estrogen receptor signaling pathway;GO:0000381 regulation of alternative mRNA splicing, via spliceosome;GO:0030518 nuclear receptor-mediated steroid hormone signaling pathway		Predicted intracellular proteins	Nucleoplasm (Supported)				0.0	0.0	0.0	0.0	0.0	0.0	0.0	1.0	0.0	0.0	0.0	0.0	0.0	0.0	0.0	0.0	0.0	0.0	0.0	0.0
ACTB	60	symbol	H. sapiens	60	H. sapiens	ACTB	actin beta	ACTB, also known as actin beta, is a gene that encodes one of six different actin proteins. Actins are highly conserved proteins that play a crucial role in cell motility, structure, integrity, and intercellular signaling. The encoded protein is a major component of the contractile apparatus and is one of the two nonmuscle cytoskeletal actins that are expressed ubiquitously. Mutations in this gen…	Baraitser-Winter syndrome 1 is a rare genetic disorder caused by mutations in the ACTB gene. This syndrome is characterized by intellectual disability, epilepsy, and a distinctive facial appearance, including a small head size, a high forehead, and widely spaced eyes. There are currently no targeted drug discovery efforts for this specific syndrome, as treatment is mainly supportive and focused o…	GO:0051623 positive regulation of norepinephrine uptake;GO:0072749 cellular response to cytochalasin B;GO:1901328 response to cytochalasin B		Disease related genes; Predicted intracellular proteins; Human disease related genes:Congenital malformations:Other congenital malformations		Quercetin; Phenethyl Isothiocyanate	(M5493)WNT SIGNALING	(M5915)HALLMARK APICAL JUNCTION	1.0	1.0	1.0	0.0	1.0	0.0	0.0	1.0	1.0	0.0	0.0	1.0	1.0	0.0	0.0	1.0	0.0	1.0	1.0	0.0
SMPD3	55512	symbol	H. sapiens	55512	H. sapiens	SMPD3	sphingomyelin phosphodiesterase 3	SMPD3, also known as sphingomyelin phosphodiesterase 3, is a gene that is predicted to have several functions, including phosphatidic acid binding activity, phosphatidylserine binding activity, and sphingomyelin phosphodiesterase activity. It is also predicted to be involved in positive regulation of exosomal secretion and sphingomyelin metabolic process, and to act upstream of or within several …	SMPD3 has been implicated in several diseases, including pulmonary emphysema, a condition characterized by damage to the air sacs in the lungs, and Niemann-Pick disease, a rare genetic disorder that affects lipid metabolism. In pulmonary emphysema, SMPD3 has been identified as a biomarker and potential therapeutic target, as it is involved in the breakdown of sphingomyelin, a lipid that accumulat…	GO:0015774 polysaccharide transport;GO:0033037 polysaccharide localization;GO:0071461 cellular response to redox state		ENZYME proteins:Hydrolases; Enzymes; Predicted intracellular proteins	Endoplasmic reticulum (Supported)	Phosphatidyl serine	(M144)PID CERAMIDE PATHWAY		0.0	0.0	0.0	0.0	0.0	0.0	1.0	1.0	0.0	0.0	0.0	0.0	0.0	0.0	1.0	0.0	0.0	0.0	0.0	0.0
BMS1P6	642826	gene_synonym	H. sapiens	642826	H. sapiens	BMS1P2	BMS1 pseudogene 2										0.0	0.0	0.0	0.0	0.0	0.0	0.0	0.0	0.0	0.0	0.0	0.0	0.0	0.0	0.0	0.0	0.0	0.0	0.0	0.0
PBX2	5089	symbol	H. sapiens	5089	H. sapiens	PBX2	PBX homeobox 2	PBX2 is a gene that belongs to the TALE/PBX homeobox family and is expressed in all tissues of the body. It was identified due to its similarity to a homeobox gene that is involved in a specific type of leukemia. PBX2 is a transcriptional activator that binds to the TLX1 promoter, which is involved in the regulation of gene expression. The gene is located within the major histocompatibility compl…	There is limited information available on the disease implications of PBX2. However, studies have shown that PBX2 is involved in the development and progression of various types of cancer, including leukemia, breast cancer, and lung cancer. Targeted drug discovery efforts for PBX2 are still in the early stages, but there is potential for the development of drugs that target PBX2 as a therapeutic …	GO:0009954 proximal/distal pattern formation;GO:0030326 embryonic limb morphogenesis;GO:0035113 embryonic appendage morphogenesis		Transcription factors:Helix-turn-helix domains; Predicted intracellular proteins	Nucleoplasm (Supported)			(M5915)HALLMARK APICAL JUNCTION	0.0	1.0	0.0	0.0	0.0	0.0	0.0	0.0	0.0	0.0	0.0	0.0	0.0	0.0	0.0	0.0	0.0	0.0	0.0	0.0
MAML3	55534	symbol	H. sapiens	55534	H. sapiens	MAML3	mastermind like transcriptional coactivator 3	MAML3, or mastermind like transcriptional coactivator 3, is a human gene that plays a role in enabling transcription coactivator activity. It is involved in the Notch signaling pathway and positively regulates transcription by RNA polymerase II. MAML3 is located in the nuclear speck. This information is provided by the Alliance of Genome Resources as of April 2022.	There is limited information available on the disease implications of MAML3. However, studies have shown that MAML3 is overexpressed in certain types of cancer, including breast cancer and lung adenocarcinoma, suggesting a potential role in oncogenesis. Targeted drug discovery efforts for MAML3 are also limited, but some studies have explored the use of small molecule inhibitors to target the Not…	GO:0007221 positive regulation of transcription of Notch receptor target;GO:0007219 Notch signaling pathway;GO:0045944 positive regulation of transcription by RNA polymerase II		Predicted intracellular proteins	Nuclear speckles (Supported)				0.0	0.0	0.0	0.0	0.0	0.0	0.0	1.0	0.0	0.0	0.0	0.0	0.0	0.0	0.0	0.0	0.0	0.0	0.0	0.0
USP38	84640	symbol	H. sapiens	84640	H. sapiens	USP38	ubiquitin specific peptidase 38	USP38 is a human gene that encodes for a protein called ubiquitin specific peptidase 38. This protein is involved in the process of deubiquitination, which is the removal of ubiquitin molecules from proteins. USP38 is predicted to be active in both the cytosol and nucleus of cells. It functions as a thiol-dependent deubiquitinase, meaning that it requires a specific type of amino acid called a th…	There is limited information available on the disease implications of USP38. However, recent studies have suggested that USP38 may play a role in the development and progression of certain types of cancer, including breast cancer and lung cancer. As a result, there has been some interest in developing drugs that target USP38 as a potential therapeutic strategy for these types of cancer. Currently…	GO:1990168 protein K33-linked deubiquitination;GO:0032435 negative regulation of proteasomal ubiquitin-dependent protein catabolic process;GO:2000059 negative regulation of ubiquitin-dependent protein catabolic process		Peptidases:Cysteine-type peptidases; ENZYME proteins:Hydrolases; Enzymes; Predicted intracellular proteins	Nucleoplasm (Approved); Additional: Centrosome;Cytosol				0.0	0.0	0.0	0.0	0.0	0.0	0.0	0.0	0.0	0.0	0.0	0.0	0.0	0.0	0.0	0.0	0.0	0.0	0.0	0.0
A_24_P503669						None	None	None	None	None	None	None	None	None	None	None	nan	nan	nan	nan	nan	nan	nan	nan	nan	nan	nan	nan	nan	nan	nan	nan	nan	nan	nan	nan
IFT20	90410	symbol	H. sapiens	90410	H. sapiens	IFT20	intraflagellar transport 20	The IFT20 gene is responsible for encoding an intraflagellar transport protein that plays a crucial role in intracellular transport. It is a part of a complex that is involved in the trafficking of proteins from the Golgi body, including the recycling of immune signaling components. The gene is part of a set of sense-antisense loci that may be co-regulated. Multiple isoforms of the gene have been…	Research has shown that mutations in the IFT20 gene can lead to a variety of diseases, including ciliopathies such as Bardet-Biedl syndrome and Jeune syndrome. In addition, dysregulation of IFT20 expression has been linked to cancer, particularly in breast and lung cancer. As a result, there has been significant interest in developing drugs that target IFT20 as a potential therapeutic strategy. H…	GO:0036372 opsin transport;GO:2000583 regulation of platelet-derived growth factor receptor-alpha signaling pathway;GO:0035845 photoreceptor cell outer segment organization		Predicted intracellular proteins	Microtubules (Approved); Additional: Basal body;End piece;Flagellar centriole;Mid piece;Mitotic spindle;Primary cilium;Principal piece				0.0	0.0	1.0	0.0	0.0	1.0	0.0	0.0	0.0	0.0	0.0	0.0	0.0	1.0	0.0	0.0	0.0	0.0	0.0	0.0
YWHAE	7531	symbol	H. sapiens	7531	H. sapiens	YWHAE	tyrosine 3-monooxygenase/tryptophan 5-monooxygenase activation protein epsilon	YWHAE is a gene that belongs to the 14-3-3 family of proteins, which are involved in signal transduction by binding to phosphoserine-containing proteins. This gene is highly conserved in both plants and mammals and is identical to the mouse ortholog. YWHAE interacts with various proteins, including CDC25 phosphatases, RAF1, and IRS1, indicating its role in diverse biochemical activities related t…	YWHAE has been implicated in several diseases, including cancer, neurodegenerative disorders, and schizophrenia. In particular, YWHAE has been found to be overexpressed in small cell lung cancer, and its inhibition has been shown to reduce tumor growth in preclinical models. Targeted drug discovery efforts have focused on developing small molecule inhibitors of YWHAE, with some promising results …	GO:0003064 regulation of heart rate by hormone;GO:1905913 negative regulation of calcium ion export across plasma membrane;GO:0003062 regulation of heart rate by chemical signal		Transporters:Accessory Factors Involved in Transport; Predicted intracellular proteins; Cancer-related genes:Candidate cancer biomarkers	Cytosol (Supported)	Fusicoccin; Phenethyl Isothiocyanate	(M199)PID P38 MK2 PATHWAY; (M247)PID INSULIN GLUCOSE PATHWAY; (M163)PID LIS1 PATHWAY	(M5893)HALLMARK MITOTIC SPINDLE; (M5926)HALLMARK MYC TARGETS V1	0.0	1.0	0.0	0.0	0.0	0.0	1.0	1.0	1.0	0.0	0.0	1.0	1.0	0.0	0.0	0.0	0.0	0.0	0.0	0.0
ACAP3	116983	symbol	H. sapiens	116983	H. sapiens	ACAP3	ArfGAP with coiled-coil, ankyrin repeat and PH domains 3	ACAP3 is a human gene that encodes a protein with multiple domains, including coiled-coil, ankyrin repeat, and PH domains. This protein is predicted to have GTPase activator and metal ion binding activities, and to be involved in regulating catalytic activity. It is also predicted to play a role in neuron migration and regulation of neuron projection development, and to be located in growth cones…	There is limited information available on the disease implications of ACAP3. However, some studies have suggested that mutations in this gene may be associated with certain types of cancer, including breast cancer and lung adenocarcinoma. Targeted drug discovery efforts for ACAP3 are also limited, as the function of this protein is not well understood. However, some studies have suggested that ta…	GO:0001764 neuron migration;GO:0010975 regulation of neuron projection development;GO:0120035 regulation of plasma membrane bounded cell projection organization		Predicted intracellular proteins	Nucleoplasm (Approved); Additional: Golgi apparatus				0.0	0.0	1.0	0.0	0.0	0.0	0.0	0.0	0.0	1.0	0.0	0.0	0.0	0.0	0.0	0.0	0.0	0.0	0.0	0.0
SIPA1L3	23094	symbol	H. sapiens	23094	H. sapiens	SIPA1L3	signal induced proliferation associated 1 like 3	SIPA1L3 is a gene that belongs to the signal induced proliferation associated 1 family of genes. It encodes GTPase-activating proteins that are specific for the GTP-binding protein Rap1. Rap1 is involved in regulating cell adhesion, cell polarity, and organization of the cytoskeleton. The protein encoded by SIPA1L3 contains RapGAP and PDZ domains, as well as a C-terminal leucine zipper domain. It…	There is limited information available on the disease implications of SIPA1L3. However, mutations in this gene have been associated with congenital cataracts in humans. Targeted drug discovery efforts for SIPA1L3 are also limited, as the function of this gene is not well understood. Currently, there are no drugs on the market that specifically target SIPA1L3. However, there are drugs that target …	GO:0090162 establishment of epithelial cell polarity;GO:0003382 epithelial cell morphogenesis;GO:0002244 hematopoietic progenitor cell differentiation		Disease related genes; Human disease related genes:Nervous system diseases:Eye disease; Predicted intracellular proteins	Plasma membrane (Supported); Additional: Golgi apparatus;Nucleoplasm				0.0	0.0	1.0	0.0	0.0	0.0	0.0	0.0	0.0	0.0	0.0	0.0	0.0	0.0	0.0	0.0	0.0	0.0	0.0	0.0
KIAA1737	85457	gene_synonym	H. sapiens	85457	H. sapiens	CIPC	CLOCK interacting pacemaker	The human gene CIPC, also known as CLOCK interacting pacemaker, is predicted to play a role in regulating circadian rhythm and transcription. It is located in various parts of the cell, including the cytosol, nucleolus, and nucleoplasm. The gene's exact function is not yet fully understood, but it is believed to interact with the CLOCK gene, which is a key regulator of the circadian clock. CIPC m…	There is limited information available on the disease implications of the CIPC gene. However, research has suggested that disruptions in circadian rhythm regulation may be linked to various health conditions, including sleep disorders, metabolic disorders, and certain types of cancer. As such, targeting genes involved in circadian rhythm regulation, such as CIPC, may hold promise for drug discove…	GO:0042754 negative regulation of circadian rhythm;GO:0042752 regulation of circadian rhythm;GO:0048511 rhythmic process		Predicted intracellular proteins	Cytosol;Nucleoplasm (Supported); Additional: Nucleoli				0.0	0.0	0.0	0.0	0.0	0.0	0.0	0.0	0.0	0.0	0.0	0.0	0.0	0.0	0.0	0.0	0.0	0.0	0.0	0.0
PEX16	9409	symbol	H. sapiens	9409	H. sapiens	PEX16	peroxisomal biogenesis factor 16	PEX16 is a gene that encodes an integral peroxisomal membrane protein. Mutations in this gene have been linked to Zellweger syndrome, a rare genetic disorder that affects the development of many organs and systems in the body. The protein product of PEX16 plays a crucial role in the organization and biogenesis of peroxisomes, which are organelles responsible for various metabolic processes. Alter…	Zellweger syndrome is a rare genetic disorder caused by mutations in PEX16 gene, which encodes a protein involved in peroxisome biogenesis. The absence or dysfunction of peroxisomes leads to the accumulation of toxic substances in the body, resulting in severe developmental abnormalities affecting multiple organs and systems. Currently, there are no targeted drugs available for the treatment of Z…	GO:0032581 ER-dependent peroxisome organization;GO:0106101 ER-dependent peroxisome localization;GO:0016557 peroxisome membrane biogenesis		Predicted intracellular proteins; Transporters; Human disease related genes:Congenital disorders of metabolism:Peroxisomal diseases; Potential drug targets; Disease related genes				(M5948)HALLMARK BILE ACID METABOLISM	0.0	0.0	0.0	0.0	0.0	1.0	0.0	0.0	0.0	0.0	0.0	0.0	0.0	0.0	0.0	0.0	0.0	0.0	0.0	0.0
PPP2R4	5524	gene_synonym	H. sapiens	5524	H. sapiens	PTPA	protein phosphatase 2 phosphatase activator	PTPA is a gene that encodes a specific phosphotyrosyl phosphatase activator of the dimeric form of protein phosphatase 2A. Protein phosphatase 2A is one of the four major Ser/Thr phosphatases and is involved in the negative control of cell growth and division. Protein phosphatase 2A holoenzymes are composed of a structural subunit A, a catalytic subunit C, and a regulatory subunit B. The regulato…	There is limited information available on the disease implications of PTPA. However, some studies have suggested that alterations in the expression or activity of protein phosphatase 2A, which is regulated by PTPA, may be involved in the development and progression of various types of cancer, including breast, lung, and prostate cancer. Targeted drug discovery efforts for PTPA are also limited, b…	GO:0007052 mitotic spindle organization;GO:1902850 microtubule cytoskeleton organization involved in mitosis;GO:0007051 spindle organization		Enzymes; ENZYME proteins:Isomerase; Predicted intracellular proteins	Nucleoplasm (Enhanced); Additional: Cytosol		(M261)PID P53 REGULATION PATHWAY; (M254)PID MYC REPRESS PATHWAY	(M5938)HALLMARK REACTIVE OXYGEN SPECIES PATHWAY	0.0	0.0	0.0	0.0	0.0	0.0	0.0	1.0	0.0	0.0	0.0	0.0	0.0	0.0	0.0	0.0	0.0	0.0	0.0	0.0
PPFIBP1	8496	symbol	H. sapiens	8496	H. sapiens	PPFIBP1	PPFIA binding protein 1	PPFIBP1 is a member of the liprin family of proteins that interact with transmembrane protein tyrosine phosphatases, which are important for axon guidance and mammary gland development. Liprins are believed to act as scaffolds for the recruitment and anchoring of these tyrosine phosphatases. PPFIBP1 has been found to interact with S100A4, a calcium-binding protein related to tumor invasiveness an…	There is limited information available on the disease implications of PPFIBP1. However, some studies have suggested that PPFIBP1 may play a role in cancer progression and metastasis. For example, PPFIBP1 has been found to be overexpressed in breast cancer and may contribute to tumor cell invasion and migration. There are currently no targeted drug discovery efforts specifically focused on PPFIBP1…	GO:0043622 cortical microtubule organization;GO:0007528 neuromuscular junction development;GO:0030865 cortical cytoskeleton organization		Cancer-related genes; Predicted intracellular proteins	Plasma membrane (Enhanced)				1.0	0.0	0.0	0.0	0.0	0.0	0.0	1.0	0.0	0.0	1.0	1.0	0.0	0.0	0.0	0.0	0.0	1.0	0.0	0.0
CCDC59	29080	symbol	H. sapiens	29080	H. sapiens	CCDC59	coiled-coil domain containing 59	CCDC59 is a human gene that encodes a protein containing a coiled-coil domain. This protein is predicted to be located in the nucleoplasm and has been shown to enable RNA binding activity. The function of CCDC59 is not yet fully understood, but it may play a role in regulating gene expression or other cellular processes involving RNA. This information is provided by the Alliance of Genome Resourc…	Unfortunately, there is currently no information available on disease implications or targeted drug discovery efforts for CCDC59. As a relatively understudied gene, there have been no drugs developed specifically targeting CCDC59. However, there are several drugs on the market that target RNA-binding proteins, which may have potential implications for CCDC59. For example, the drug Spinraza (nusin…			Predicted intracellular proteins	Nucleoli;Nucleoli rim (Approved); Additional: Nucleoplasm;Plasma membrane				0.0	0.0	0.0	0.0	0.0	0.0	0.0	0.0	0.0	0.0	0.0	0.0	0.0	0.0	0.0	0.0	0.0	0.0	0.0	0.0
TSPYL2	64061	symbol	H. sapiens	64061	H. sapiens	TSPYL2	TSPY like 2	TSPYL2 is a gene that belongs to the TSPY-like/SET/nucleosome assembly protein-1 superfamily. It is primarily expressed in the testis and is localized in the nucleolus. The protein encoded by this gene is involved in chromatin remodeling and acts as an inhibitor of cell-cycle progression. It is believed to play a role in suppressing tumor growth. TSPYL2 is a potential target for cancer therapy du…	There is limited information available on the disease implications of TSPYL2. However, studies have shown that TSPYL2 expression is downregulated in various types of cancer, including breast, lung, and prostate cancer. This suggests that TSPYL2 may play a role in tumor suppression and could be a potential target for cancer therapy. Targeted drug discovery efforts for TSPYL2 are still in the early…	GO:0008156 negative regulation of DNA replication;GO:0006334 nucleosome assembly;GO:0006275 regulation of DNA replication		Predicted intracellular proteins				(M5922)HALLMARK UNFOLDED PROTEIN RESPONSE; (M5939)HALLMARK P53 PATHWAY	0.0	0.0	0.0	0.0	1.0	0.0	0.0	0.0	0.0	0.0	0.0	0.0	0.0	0.0	0.0	0.0	0.0	0.0	0.0	0.0
SYP	6855	symbol	H. sapiens	6855	H. sapiens	SYP	synaptophysin	The SYP gene encodes a protein called synaptophysin, which is found in small synaptic vesicles in the brain and endocrine cells. This protein is involved in directing the targeting of another protein called synaptobrevin to intracellular compartments. Additionally, synaptophysin binds to cholesterol. Mutations in the SYP gene have been linked to an X-linked form of cognitive disability.	Mutations in the SYP gene have been linked to an X-linked form of cognitive disability, which is characterized by intellectual disability, delayed speech and language development, and behavioral problems. Currently, there are no targeted drug discovery efforts specifically for SYP gene mutations. However, there are drugs on the market that target synaptic vesicle proteins, such as botulinum toxin…	GO:2000474 regulation of opioid receptor signaling pathway;GO:0010807 regulation of synaptic vesicle priming;GO:0048172 regulation of short-term neuronal synaptic plasticity		Disease related genes; Human disease related genes:Other diseases:Mental and behavioural disorders; Potential drug targets; Transporters					0.0	0.0	0.0	1.0	0.0	0.0	0.0	0.0	0.0	0.0	0.0	0.0	0.0	0.0	0.0	1.0	0.0	0.0	0.0	1.0
LOC441454	441454	Gene_ID	H. sapiens	441454	H. sapiens	PTMAP11	prothymosin alpha pseudogene 11										0.0	0.0	0.0	0.0	0.0	0.0	0.0	0.0	0.0	0.0	0.0	0.0	0.0	0.0	0.0	0.0	0.0	0.0	0.0	0.0
A_24_P359105						None	None	None	None	None	None	None	None	None	None	None	nan	nan	nan	nan	nan	nan	nan	nan	nan	nan	nan	nan	nan	nan	nan	nan	nan	nan	nan	nan
AC136443.1						None	None	None	None	None	None	None	None	None	None	None	nan	nan	nan	nan	nan	nan	nan	nan	nan	nan	nan	nan	nan	nan	nan	nan	nan	nan	nan	nan
TFAP2B	7021	symbol	H. sapiens	7021	H. sapiens	TFAP2B	transcription factor AP-2 beta	TFAP2B is a gene that belongs to the AP-2 family of transcription factors. These proteins bind to specific DNA sequences and are involved in regulating cell proliferation and differentiation during embryonic development. TFAP2B can function as both a transcriptional activator and repressor. Mutations in this gene have been linked to autosomal dominant Char syndrome, which suggests that it plays a…	Mutations in the TFAP2B gene have been linked to several diseases, including autosomal dominant Char syndrome, which is characterized by patent ductus arteriosus, facial dysmorphism, and hand anomalies. Additionally, TFAP2B has been implicated in the development of breast cancer, where it is overexpressed in some cases. Targeted drug discovery efforts for TFAP2B are still in the early stages, but…	GO:0097070 ductus arteriosus closure;GO:0072017 distal tubule development;GO:0072044 collecting duct development		Human disease related genes:Congenital malformations:Congenital malformations of the circulatory system; Transcription factors:Basic domains; Predicted intracellular proteins; Human disease related genes:Congenital malformations:Other congenital malformations; Disease related genes; Cancer-related genes:Candidate cancer biomarkers	Nucleoplasm (Approved)			(M5956)HALLMARK KRAS SIGNALING DN	0.0	0.0	0.0	0.0	0.0	0.0	1.0	0.0	0.0	0.0	0.0	0.0	0.0	0.0	1.0	0.0	0.0	0.0	0.0	0.0
KIF3B	9371	symbol	H. sapiens	9371	H. sapiens	KIF3B	kinesin family member 3B	KIF3B is a human gene that encodes a protein that works with kinesin family member 3A to help move chromosomes during cell division. The protein is a type of motor that moves along microtubules in a specific direction and can also interact with a protein complex called cohesin. Additionally, KIF3B may play a role in moving organelles within cells. KIF3B and kinesin family member 3A belong to the …	There is limited information available on the disease implications of KIF3B. However, some studies have suggested that mutations in KIF3B may be associated with certain types of cancer, including breast cancer and lung cancer. Targeted drug discovery efforts for KIF3B are also limited, but some studies have explored the potential of KIF3B as a therapeutic target for cancer treatment. One study fo…	GO:0036372 opsin transport;GO:0007100 mitotic centrosome separation;GO:0072383 plus-end-directed vesicle transport along microtubule		Disease related genes; Human disease related genes:Nervous system diseases:Eye disease; Predicted intracellular proteins	Flagellar centriole;Nucleoplasm;Primary cilium tip (Approved); Additional: Connecting piece;Cytosol			(M5893)HALLMARK MITOTIC SPINDLE	0.0	0.0	0.0	0.0	0.0	0.0	0.0	0.0	0.0	0.0	0.0	0.0	0.0	0.0	0.0	0.0	0.0	0.0	0.0	0.0
PCSK7	9159	symbol	H. sapiens	9159	H. sapiens	PCSK7	proprotein convertase subtilisin/kexin type 7	The PCSK7 gene encodes a type 1 membrane bound protease that belongs to the subtilisin-like proprotein convertase family. It is expressed in various tissues, including the brain, liver, gut, and neuroendocrine system. The protein undergoes an initial autocatalytic processing event in the endoplasmic reticulum and then sorts to the trans-Golgi network through endosomes where a second autocatalytic…	PCSK7 has been implicated in various diseases, including obesity, diabetes, and cardiovascular disease. In particular, PCSK7 has been identified as a potential therapeutic target for the treatment of hypercholesterolemia, as it plays a key role in the processing of proprotein convertase subtilisin/kexin type 9 (PCSK9), a protein that regulates low-density lipoprotein (LDL) receptor levels. Severa…	GO:0016486 peptide hormone processing;GO:0140448 signaling receptor ligand precursor processing;GO:0016485 protein processing		Enzymes; Peptidases:Serine-type peptidases; Predicted intracellular proteins					0.0	0.0	0.0	0.0	0.0	0.0	0.0	0.0	0.0	0.0	0.0	0.0	0.0	0.0	0.0	0.0	0.0	0.0	0.0	0.0
ANKRD23	200539	symbol	H. sapiens	200539	H. sapiens	ANKRD23	ankyrin repeat domain 23	ANKRD23 is a gene that belongs to the muscle ankyrin repeat protein (MARP) family. It encodes a protein with four ankyrin-like repeats and is primarily located in the nucleus, where it acts as a transcriptional regulator. The expression of ANKRD23 is induced during recovery after starvation.	There is limited information available on the disease implications of ANKRD23. However, recent studies have suggested that ANKRD23 may play a role in the development of certain types of cancer, including breast cancer and hepatocellular carcinoma. Targeted drug discovery efforts for ANKRD23 are currently underway, with a focus on identifying small molecule inhibitors that can selectively target t…	GO:0060297 regulation of sarcomere organization;GO:0035994 response to muscle stretch;GO:0110020 regulation of actomyosin structure organization		Predicted intracellular proteins	Cytosol;Nucleoplasm (Approved); Additional: Actin filaments				0.0	0.0	0.0	0.0	0.0	0.0	0.0	0.0	0.0	0.0	0.0	0.0	0.0	0.0	0.0	0.0	0.0	0.0	0.0	0.0
NRP1	8829	symbol	H. sapiens	8829	H. sapiens	NRP1	neuropilin 1	NRP1, or neuropilin 1, is a gene that encodes a protein involved in various signaling pathways that control cell migration. The protein contains specific domains that allow it to bind to many ligands and co-receptors, affecting cell survival, migration, and attraction. Some of the ligands and co-receptors bound by NRP1 include vascular endothelial growth factor (VEGF) and semaphorin family member…	NRP1 has been implicated in various diseases, including cancer, cardiovascular disease, and neurological disorders. In cancer, NRP1 is often overexpressed and promotes tumor growth, angiogenesis, and metastasis. Targeting NRP1 has been explored as a potential therapeutic strategy for cancer treatment. Several drugs targeting NRP1 are currently in preclinical and clinical development, including mo…	GO:0021649 vestibulocochlear nerve structural organization;GO:0038190 VEGF-activated neuropilin signaling pathway;GO:0061441 renal artery morphogenesis		Predicted intracellular proteins; Predicted secreted proteins; Transporters:Accessory Factors Involved in Transport; CD markers; Cancer-related genes:Candidate cancer biomarkers	Mitochondria (Uncertain)	Palifermin; Pegaptanib	(M137)PID VEGF VEGFR PATHWAY; (M226)PID VEGFR1 PATHWAY	(M5919)HALLMARK HEDGEHOG SIGNALING; (M5944)HALLMARK ANGIOGENESIS; (M5942)HALLMARK UV RESPONSE DN	1.0	1.0	1.0	0.0	0.0	0.0	0.0	1.0	0.0	0.0	0.0	0.0	0.0	0.0	0.0	0.0	0.0	0.0	1.0	0.0
A_24_P927166						None	None	None	None	None	None	None	None	None	None	None	nan	nan	nan	nan	nan	nan	nan	nan	nan	nan	nan	nan	nan	nan	nan	nan	nan	nan	nan	nan
A_24_P126731						None	None	None	None	None	None	None	None	None	None	None	nan	nan	nan	nan	nan	nan	nan	nan	nan	nan	nan	nan	nan	nan	nan	nan	nan	nan	nan	nan
TMEM88	92162	symbol	H. sapiens	92162	H. sapiens	TMEM88	transmembrane protein 88	TMEM88 is a human gene that encodes for a transmembrane protein 88. This protein is predicted to have PDZ domain binding activity and is involved in negative regulation of the canonical Wnt signaling pathway, protein localization to the plasma membrane, and protein stabilization. TMEM88 is located in both the cytosol and plasma membrane.	There is limited information available on the disease implications of TMEM88. However, recent studies have suggested that TMEM88 may play a role in the development and progression of certain types of cancer, including breast cancer and hepatocellular carcinoma. As a result, there has been some interest in developing drugs that target TMEM88 as a potential therapeutic strategy for these cancers. C…	GO:0090090 negative regulation of canonical Wnt signaling pathway;GO:0030178 negative regulation of Wnt signaling pathway;GO:0072659 protein localization to plasma membrane							0.0	0.0	0.0	0.0	0.0	1.0	0.0	0.0	0.0	0.0	0.0	0.0	0.0	0.0	0.0	0.0	0.0	0.0	0.0	0.0
FAM168B	130074	symbol	H. sapiens	130074	H. sapiens	FAM168B	family with sequence similarity 168 member B	FAM168B is a human gene that belongs to the family with sequence similarity 168. It is located in the extracellular exosome, which is a small vesicle that is released from cells and contains various biomolecules, including proteins and nucleic acids. The function of FAM168B is not well understood, but it has been suggested to play a role in cellular processes such as protein degradation and RNA m…	There is limited information available on the disease implications of FAM168B. However, some studies have suggested that it may be involved in the development and progression of certain types of cancer, including breast cancer and hepatocellular carcinoma. Targeted drug discovery efforts for FAM168B are currently limited, as its function is not well understood. However, there is potential for the…			Predicted intracellular proteins					0.0	0.0	0.0	0.0	0.0	0.0	0.0	0.0	0.0	0.0	0.0	0.0	0.0	0.0	0.0	0.0	0.0	0.0	0.0	0.0
PCDHB13	56123	symbol	H. sapiens	56123	H. sapiens	PCDHB13	protocadherin beta 13	PCDHB13 is a gene that belongs to the protocadherin beta gene cluster, which is one of three gene clusters located on chromosome five. The beta cluster contains 16 genes and 3 pseudogenes, each encoding 6 extracellular cadherin domains and a cytoplasmic tail that differs from other cadherin superfamily members. These proteins are involved in cell-cell adhesion and are integral plasma membrane pro…	There is limited information available on the disease implications of PCDHB13. However, studies have suggested that alterations in the expression of protocadherin beta genes, including PCDHB13, may be associated with various neurological disorders, such as autism spectrum disorder and schizophrenia. Targeted drug discovery efforts for PCDHB13 are also limited, as its specific function is not well…	GO:0016339 calcium-dependent cell-cell adhesion via plasma membrane cell adhesion molecules;GO:0007416 synapse assembly;GO:0007156 homophilic cell adhesion via plasma membrane adhesion molecules							1.0	0.0	0.0	1.0	0.0	0.0	0.0	0.0	0.0	0.0	0.0	0.0	0.0	0.0	0.0	0.0	0.0	0.0	0.0	0.0
MAPKAP1	79109	symbol	H. sapiens	79109	H. sapiens	MAPKAP1	MAPK associated protein 1	The human gene MAPKAP1, also known as MAPK associated protein 1, encodes a protein that is similar to the yeast SIN1 protein, which is a stress-activated protein kinase. The gene has multiple alternate spliced transcript variants that encode distinct isoforms, and alternate polyadenylation sites and 3' UTRs have been identified for transcripts of this gene. The gene's function is not fully unders…	Research on the MAPKAP1 gene has suggested its potential involvement in various diseases, including cancer, cardiovascular disease, and neurological disorders. For example, studies have shown that MAPKAP1 may play a role in the development and progression of breast cancer, and its expression has been found to be upregulated in certain types of cancer cells. Additionally, mutations in the gene hav…	GO:0038203 TORC2 signaling;GO:0046580 negative regulation of Ras protein signal transduction;GO:1900407 regulation of cellular response to oxidative stress		Predicted intracellular proteins	Nucleoplasm (Approved); Additional: Cytosol;Primary cilium		(M249)PID PI3KCI AKT PATHWAY; (M222)PID CXCR3 PATHWAY; (M121)PID MTOR 4PATHWAY	(M5923)HALLMARK PI3K AKT MTOR SIGNALING	0.0	1.0	0.0	0.0	1.0	0.0	0.0	1.0	0.0	0.0	0.0	0.0	0.0	0.0	0.0	0.0	0.0	0.0	0.0	1.0
A_23_P369600						None	None	None	None	None	None	None	None	None	None	None	nan	nan	nan	nan	nan	nan	nan	nan	nan	nan	nan	nan	nan	nan	nan	nan	nan	nan	nan	nan
A_24_P161393						None	None	None	None	None	None	None	None	None	None	None	nan	nan	nan	nan	nan	nan	nan	nan	nan	nan	nan	nan	nan	nan	nan	nan	nan	nan	nan	nan
A_32_P224449						None	None	None	None	None	None	None	None	None	None	None	nan	nan	nan	nan	nan	nan	nan	nan	nan	nan	nan	nan	nan	nan	nan	nan	nan	nan	nan	nan
KIDINS220	57498	symbol	H. sapiens	57498	H. sapiens	KIDINS220	kinase D interacting substrate 220	KIDINS220, also known as kinase D interacting substrate 220, is a transmembrane protein that is primarily expressed in the nervous system. It plays a crucial role in neuronal cell survival, differentiation, and synaptic plasticity. The protein acts as a scaffold, mediating communication between the neurotrophin pathway and other intracellular signaling pathways. Abnormal expression of KIDINS220 i…	KIDINS220 has been implicated in various neuropsychiatric disorders and neurodegenerative diseases, including Alzheimer's disease, schizophrenia, and bipolar disorder. Targeted drug discovery efforts have focused on developing drugs that modulate the neurotrophin pathway, which is mediated by KIDINS220. One example is the drug memantine, which is used to treat Alzheimer's disease and works by blo…	GO:0038180 nerve growth factor signaling pathway;GO:0038179 neurotrophin signaling pathway;GO:1990090 cellular response to nerve growth factor stimulus		Disease related genes; Transporters:Accessory Factors Involved in Transport; Potential drug targets; Predicted intracellular proteins	Nucleoplasm (Uncertain); Additional: Cytosol;Vesicles				0.0	0.0	1.0	0.0	0.0	0.0	0.0	1.0	1.0	0.0	0.0	0.0	0.0	0.0	0.0	0.0	0.0	0.0	0.0	0.0
A_24_P126325						None	None	None	None	None	None	None	None	None	None	None	nan	nan	nan	nan	nan	nan	nan	nan	nan	nan	nan	nan	nan	nan	nan	nan	nan	nan	nan	nan
ANKRD43	134548	gene_synonym	H. sapiens	134548	H. sapiens	SOWAHA	sosondowah ankyrin repeat domain family member A	SOWAHA (sosondowah ankyrin repeat domain family member A) is a human gene that encodes a protein involved in the regulation of protein degradation and cell signaling pathways. The protein contains ankyrin repeat domains, which are involved in protein-protein interactions. SOWAHA has been implicated in various cellular processes, including cell cycle regulation, DNA damage response, and apoptosis.…	There is limited information available on the disease implications of SOWAHA mutations, and no targeted drug discovery efforts have been reported for this gene. However, mutations in SOWAHA have been associated with developmental disorders, such as intellectual disability and autism spectrum disorder. Currently, there are no drugs on the market that specifically target SOWAHA. However, there are …			Predicted intracellular proteins					0.0	0.0	0.0	0.0	0.0	0.0	0.0	0.0	0.0	0.0	0.0	0.0	0.0	0.0	0.0	0.0	0.0	0.0	0.0	0.0
PKP2	5318	symbol	H. sapiens	5318	H. sapiens	PKP2	plakophilin 2	PKP2, also known as plakophilin 2, is a gene that belongs to the arm-repeat and plakophilin gene families. Plakophilin proteins contain armadillo repeats and are involved in linking cadherins to intermediate filaments in the cytoskeleton. PKP2 regulates the signaling activity of beta-catenin and is required to maintain transcription of genes that control intracellular calcium cycling. Mutations i…	Mutations in the PKP2 gene have been linked to various inherited cardiac conditions, including Arrythmogenic Cardiomyopathy, Brugada Syndrome, and Idiopathic Ventricular Fibrillation. These conditions are characterized by abnormal heart rhythms and can lead to sudden cardiac death. Targeted drug discovery efforts for these conditions have focused on developing drugs that can regulate the activity…	GO:0099017 maintenance of protein localization at cell tip;GO:0048496 maintenance of animal organ identity;GO:0002159 desmosome assembly		Disease related genes; Predicted intracellular proteins; Human disease related genes:Cardiovascular diseases:Cardiac diseases	Cell Junctions (Enhanced); Additional: Nucleoplasm			(M5937)HALLMARK GLYCOLYSIS	1.0	0.0	0.0	0.0	0.0	1.0	0.0	0.0	0.0	0.0	0.0	1.0	0.0	0.0	0.0	0.0	0.0	1.0	0.0	0.0
A_24_P703674						None	None	None	None	None	None	None	None	None	None	None	nan	nan	nan	nan	nan	nan	nan	nan	nan	nan	nan	nan	nan	nan	nan	nan	nan	nan	nan	nan
ITGB1	3688	symbol	H. sapiens	3688	H. sapiens	ITGB1	integrin subunit beta 1	ITGB1 is a gene that encodes for the beta subunit of integrins, which are proteins involved in cell adhesion and recognition. Integrins are made up of alpha and beta subunits, and there are at least 18 alpha and 8 beta subunits in mammals. This gene is involved in various processes including embryogenesis, hemostasis, tissue repair, immune response, and metastatic diffusion of tumor cells. There …	ITGB1 has been implicated in various diseases, including cancer, cardiovascular disease, and autoimmune disorders. In cancer, ITGB1 has been shown to play a role in tumor cell invasion and metastasis, making it a potential target for cancer therapy. Several drugs targeting ITGB1 are currently in development, including monoclonal antibodies and small molecule inhibitors. One example is Cilengitide…	GO:0048626 myoblast fate specification;GO:0051943 positive regulation of amino acid uptake involved in synaptic transmission;GO:0051951 positive regulation of glutamate uptake involved in transmission of nerve impulse		Predicted intracellular proteins; Transporters; FDA approved drug targets:Biotech drugs; CD markers; Cancer-related genes:Candidate cancer biomarkers	Focal adhesion sites;Plasma membrane (Supported); Additional: Endoplasmic reticulum	Antithymocyte immunoglobulin (rabbit)	(M11)PID PRL SIGNALING EVENTS PATHWAY; (M118)PID INTEGRIN A9B1 PATHWAY; (M274)PID LYMPH ANGIOGENESIS PATHWAY	(M5909)HALLMARK MYOGENESIS; (M5915)HALLMARK APICAL JUNCTION; (M5930)HALLMARK EPITHELIAL MESENCHYMAL TRANSITION	0.0	1.0	1.0	1.0	0.0	0.0	1.0	1.0	1.0	0.0	0.0	1.0	0.0	1.0	0.0	0.0	0.0	1.0	1.0	0.0
RGS3	5998	symbol	H. sapiens	5998	H. sapiens	RGS3	regulator of G protein signaling 3	RGS3 is a gene that belongs to the regulator of G-protein signaling (RGS) family. It encodes a protein that acts as a GTPase-activating protein, which inhibits G-protein-mediated signal transduction. The gene undergoes alternative splicing and the use of alternative promoters, resulting in multiple transcript variants that encode different isoforms. Long isoforms are mainly found in the cytosol a…	Research has shown that RGS3 plays a role in several diseases, including cancer, cardiovascular disease, and neurological disorders. In cancer, RGS3 has been found to be downregulated in several types of tumors, including breast, lung, and prostate cancer. This suggests that RGS3 may act as a tumor suppressor, and its loss may contribute to cancer progression. In cardiovascular disease, RGS3 has …	GO:0008277 regulation of G protein-coupled receptor signaling pathway;GO:0007186 G protein-coupled receptor signaling pathway;GO:0009968 negative regulation of signal transduction		Predicted intracellular proteins	Plasma membrane (Supported)		(M257)PID EPHRINB REV PATHWAY		0.0	0.0	0.0	0.0	0.0	0.0	0.0	0.0	0.0	0.0	0.0	0.0	1.0	0.0	0.0	0.0	0.0	0.0	1.0	0.0
METTL2A	339175	symbol	H. sapiens	339175	H. sapiens	METTL2A	methyltransferase 2A, tRNA N3-cytidine	METTL2A is a human gene that encodes for a protein called methyltransferase 2A, methylcytidine. This protein is involved in the process of tRNA methylation, specifically enabling tRNA (cytosine-3-)-methyltransferase activity. tRNA methylation is a crucial process in the regulation of gene expression and protein synthesis. The function of METTL2A in this process highlights its importance in mainta…	There is limited information available on the disease implications of METTL2A. However, recent studies have suggested that dysregulation of tRNA methylation, which is mediated by METTL2A, may be involved in the development of certain cancers. Targeted drug discovery efforts for METTL2A are still in the early stages, but there is potential for the development of drugs that modulate tRNA methylatio…	GO:0030488 tRNA methylation;GO:0001510 RNA methylation;GO:0006400 tRNA modification		Predicted intracellular proteins					0.0	0.0	0.0	0.0	0.0	0.0	0.0	0.0	0.0	0.0	0.0	0.0	0.0	0.0	0.0	0.0	0.0	0.0	0.0	0.0
A_24_P401051						None	None	None	None	None	None	None	None	None	None	None	nan	nan	nan	nan	nan	nan	nan	nan	nan	nan	nan	nan	nan	nan	nan	nan	nan	nan	nan	nan
IKBKB	3551	symbol	H. sapiens	3551	H. sapiens	IKBKB	inhibitor of nuclear factor kappa B kinase subunit beta	The IKBKB gene encodes a protein that plays a crucial role in the activation of the NF-kappa-B pathway. This protein phosphorylates the inhibitor in the inhibitor/NF-kappa-B complex, leading to the dissociation of the inhibitor and activation of NF-kappa-B. The protein is found in a complex of proteins and has several transcript variants, some of which are protein-coding and some are not. This ge…	Dysregulation of the IKBKB gene has been implicated in various diseases, including cancer, autoimmune disorders, and inflammatory diseases. In cancer, overexpression of IKBKB has been observed in several types of tumors, including breast, lung, and pancreatic cancer, and has been associated with tumor growth and metastasis. In autoimmune disorders, such as rheumatoid arthritis and multiple sclero…	GO:0002479 antigen processing and presentation of exogenous peptide antigen via MHC class I, TAP-dependent;GO:1903347 negative regulation of bicellular tight junction assembly;GO:0042590 antigen processing and presentation of exogenous peptide antigen via MHC class I	yes	Predicted intracellular proteins; Kinases; Cancer-related genes; Human disease related genes:Immune system diseases:Primary immunodeficiency; ENZYME proteins:Transferases; FDA approved drug targets:Small molecule drugs; Disease related genes; Enzymes; RAS pathway related proteins	Cytosol (Supported)	Mesalazine; Sulfasalazine; Acetylsalicylic acid; Auranofin; Arsenic trioxide; MLN0415; Acetylcysteine; Ertiprotafib; Fostamatinib	(M26)PID NFKAPPAB ATYPICAL PATHWAY; (M37)PID NFKAPPAB CANONICAL PATHWAY; (M264)PID TOLL ENDOGENOUS PATHWAY	(M5950)HALLMARK ALLOGRAFT REJECTION	0.0	0.0	0.0	0.0	0.0	1.0	0.0	1.0	0.0	0.0	0.0	0.0	0.0	0.0	0.0	0.0	0.0	0.0	0.0	0.0
ADD2	119	symbol	H. sapiens	119	H. sapiens	ADD2	adducin 2	ADD2, also known as adducin 2, is a gene that encodes for a subunit of the adducin protein family. Adducins are involved in the assembly of the spectrin-actin network in erythrocytes and at sites of cell-cell contact in epithelial tissues. ADD2 specifically encodes for the beta subunit of adducin, which is primarily expressed in the brain and hematopoietic tissues. Polymorphisms in the alpha and …	There is limited information on the disease implications of ADD2. However, studies have suggested that polymorphisms in the alpha and beta subunits of adducin may be associated with hypertension and cardiovascular disease. Targeted drug discovery efforts for ADD2 have not been extensively explored, but some studies have investigated the potential of targeting adducin as a therapeutic strategy for…	GO:0051016 barbed-end actin filament capping;GO:0050901 leukocyte tethering or rolling;GO:0061756 leukocyte adhesion to vascular endothelial cell		Predicted intracellular proteins	Cytosol;Nucleoplasm (Approved); Additional: Plasma membrane			(M5945)HALLMARK HEME METABOLISM	1.0	0.0	0.0	0.0	0.0	0.0	0.0	0.0	0.0	0.0	0.0	0.0	0.0	0.0	0.0	0.0	0.0	1.0	0.0	0.0
MTERFD2	130916	gene_synonym	H. sapiens	130916	H. sapiens	MTERF4	mitochondrial transcription termination factor 4	MTERF4 is a human gene that encodes for a mitochondrial transcription termination factor 4. It has been predicted to be involved in rRNA processing and regulation of transcription, DNA-templated. MTERF4 is also predicted to act upstream of or within several processes, including mitochondrial transcription, protein targeting to mitochondrion, and ribosome assembly. It is located in both the cytoso…	There is limited information available on the disease implications of MTERF4. However, recent studies have suggested that mutations in MTERF4 may be associated with mitochondrial dysfunction and neurodegenerative disorders such as Parkinson's disease. Targeted drug discovery efforts for MTERF4 are currently underway, with a focus on identifying small molecules that can modulate its activity and p…	GO:0061668 mitochondrial ribosome assembly;GO:0006390 mitochondrial transcription;GO:0000959 mitochondrial RNA metabolic process		Predicted intracellular proteins	Cytosol;Mitochondria (Supported)				0.0	0.0	0.0	0.0	0.0	0.0	0.0	0.0	0.0	0.0	0.0	0.0	0.0	0.0	0.0	0.0	0.0	0.0	0.0	0.0
A_24_P67148						None	None	None	None	None	None	None	None	None	None	None	nan	nan	nan	nan	nan	nan	nan	nan	nan	nan	nan	nan	nan	nan	nan	nan	nan	nan	nan	nan
IRS2	8660	symbol	H. sapiens	8660	H. sapiens	IRS2	insulin receptor substrate 2	The IRS2 gene encodes a cytoplasmic signaling molecule called insulin receptor substrate 2, which acts as a molecular adaptor between various receptor tyrosine kinases and downstream effectors. It mediates the effects of insulin, insulin-like growth factor 1, and other cytokines. When the insulin receptor is stimulated, the product of this gene is phosphorylated by the insulin receptor tyrosine k…	Mutations in the IRS2 gene have been associated with insulin resistance and type 2 diabetes, as well as other metabolic disorders such as obesity and metabolic syndrome. Targeted drug discovery efforts have focused on developing drugs that can improve insulin sensitivity and glucose metabolism by targeting the IRS2 signaling pathway. One example of a successful drug on the market is metformin, wh…	GO:0010748 negative regulation of long-chain fatty acid import across plasma membrane;GO:0140213 negative regulation of long-chain fatty acid import into cell;GO:1904692 positive regulation of type B pancreatic cell proliferation		Cancer-related genes:Mutational cancer driver genes; Predicted intracellular proteins	Cytosol (Supported); Additional: Aggresome		(M1718)SIG IL4RECEPTOR IN B LYPHOCYTES; (M125)PID IGF1 PATHWAY; (M233)PID EPO PATHWAY	(M5890)HALLMARK TNFA SIGNALING VIA NFKB; (M5891)HALLMARK HYPOXIA; (M5937)HALLMARK GLYCOLYSIS	0.0	1.0	0.0	0.0	0.0	0.0	1.0	1.0	0.0	0.0	0.0	1.0	0.0	0.0	1.0	0.0	0.0	0.0	1.0	0.0
A_32_P121326						None	None	None	None	None	None	None	None	None	None	None	nan	nan	nan	nan	nan	nan	nan	nan	nan	nan	nan	nan	nan	nan	nan	nan	nan	nan	nan	nan
TSC22D1	8848	symbol	H. sapiens	8848	H. sapiens	TSC22D1	TSC22 domain family member 1	TSC22D1 is a gene that encodes a transcription factor belonging to the TSC22 domain family. This protein is activated by transforming growth factor beta and is involved in regulating the transcription of various genes, including C-type natriuretic peptide. It is believed to play a crucial role in tumor suppression by inducing apoptosis in cancer cells. A single nucleotide polymorphism in the prom…	TSC22D1 has been implicated in various diseases, including cancer, diabetes, and cardiovascular diseases. In cancer, TSC22D1 has been shown to act as a tumor suppressor by inducing apoptosis in cancer cells. Therefore, targeting TSC22D1 could be a potential strategy for cancer therapy. In diabetes, a single nucleotide polymorphism in the promoter of TSC22D1 has been linked to diabetic nephropathy…	GO:1902034 negative regulation of hematopoietic stem cell proliferation;GO:1902033 regulation of hematopoietic stem cell proliferation;GO:2000647 negative regulation of stem cell proliferation		Transcription factors:Basic domains; Predicted intracellular proteins	Nuclear bodies;Nucleoplasm (Approved)			(M5908)HALLMARK ANDROGEN RESPONSE; (M5890)HALLMARK TNFA SIGNALING VIA NFKB; (M5939)HALLMARK P53 PATHWAY	0.0	0.0	0.0	0.0	0.0	0.0	0.0	0.0	0.0	0.0	0.0	0.0	0.0	0.0	0.0	0.0	0.0	0.0	0.0	0.0
LOC199882	199882	Gene_ID	H. sapiens	199882	H. sapiens	PDE4DIPP3	PDE4DIP pseudogene 3										0.0	0.0	0.0	0.0	0.0	0.0	0.0	0.0	0.0	0.0	0.0	0.0	0.0	0.0	0.0	0.0	0.0	0.0	0.0	0.0
AC022596.6						None	None	None	None	None	None	None	None	None	None	None	nan	nan	nan	nan	nan	nan	nan	nan	nan	nan	nan	nan	nan	nan	nan	nan	nan	nan	nan	nan
PPY2	23614	gene_synonym	H. sapiens	23614	H. sapiens	PPY2P	pancreatic polypeptide 2, pseudogene										0.0	0.0	0.0	0.0	0.0	0.0	0.0	0.0	0.0	0.0	0.0	0.0	0.0	0.0	0.0	0.0	0.0	0.0	0.0	0.0
EBF3	253738	symbol	H. sapiens	253738	H. sapiens	EBF3	EBF transcription factor 3	EBF3 is a gene that encodes a transcription factor belonging to the early B-cell factor family. This gene is involved in various biological processes such as B-cell differentiation, bone development, and neurogenesis. It also functions as a tumor suppressor by regulating genes that control cell cycle arrest and apoptosis. Abnormal methylation or deletion of this gene may contribute to the develop…	There are several disease implications associated with EBF3 gene dysregulation. For instance, EBF3 has been found to be downregulated in glioblastoma multiforme, a highly aggressive brain tumor, and its restoration has been shown to inhibit tumor growth. Similarly, EBF3 has been found to be downregulated in gastric carcinoma, and its overexpression has been shown to suppress tumor cell proliferat…	GO:0045893 positive regulation of DNA-templated transcription;GO:1902680 positive regulation of RNA biosynthetic process;GO:0051254 positive regulation of RNA metabolic process		Disease related genes; Transcription factors:Immunoglobulin fold; Predicted intracellular proteins; Human disease related genes:Congenital malformations:Other congenital malformations	Nucleoplasm (Approved); Additional: Vesicles				0.0	0.0	0.0	0.0	0.0	0.0	0.0	0.0	0.0	0.0	0.0	0.0	0.0	0.0	0.0	0.0	0.0	0.0	0.0	0.0
A_32_P149288						None	None	None	None	None	None	None	None	None	None	None	nan	nan	nan	nan	nan	nan	nan	nan	nan	nan	nan	nan	nan	nan	nan	nan	nan	nan	nan	nan
BEST1	7439	symbol	H. sapiens	7439	H. sapiens	BEST1	bestrophin 1	The BEST1 gene belongs to the bestrophin gene family and encodes a protein with four to six transmembrane domains. Bestrophins are believed to form calcium-activated chloride-ion channels in epithelial cells and are highly permeable to bicarbonate ion transport in retinal tissue. Mutations in this gene are responsible for various forms of vitelliform macular dystrophy, including juvenile-onset vi…	Mutations in the BEST1 gene have been linked to various forms of macular dystrophy, including juvenile-onset vitelliform macular dystrophy (VMD2) and adult-onset vitelliform macular dystrophy (AVMD). These conditions are characterized by the accumulation of lipofuscin in the retinal pigment epithelium, leading to progressive vision loss. There are currently no targeted drugs available for the tre…	GO:0061534 gamma-aminobutyric acid secretion, neurotransmission;GO:0014051 gamma-aminobutyric acid secretion;GO:0030321 transepithelial chloride transport		Human disease related genes:Nervous system diseases:Eye disease; Predicted intracellular proteins; Potential drug targets; Disease related genes; Transporters:Transporter channels and pores				(M5932)HALLMARK INFLAMMATORY RESPONSE	0.0	0.0	0.0	1.0	0.0	0.0	0.0	0.0	0.0	0.0	1.0	1.0	0.0	0.0	0.0	0.0	0.0	0.0	0.0	0.0
A_24_P67948						None	None	None	None	None	None	None	None	None	None	None	nan	nan	nan	nan	nan	nan	nan	nan	nan	nan	nan	nan	nan	nan	nan	nan	nan	nan	nan	nan
TANC2	26115	symbol	H. sapiens	26115	H. sapiens	TANC2	tetratricopeptide repeat, ankyrin repeat and coiled-coil containing 2	TANC2 is a human gene that is predicted to play a role in dense core granule cytoskeletal transport, regulation of dendritic spine development, and regulation of dendritic spine morphogenesis. It is also predicted to act upstream of or within in utero embryonic development. TANC2 is located in dendritic spine, which is a small protrusion from a neuron that receives input from other neurons. The g…	There is limited information available on the disease implications of TANC2. However, mutations in this gene have been associated with autism spectrum disorder (ASD) and intellectual disability. Targeted drug discovery efforts for TANC2 are currently underway, with a focus on developing drugs that can modulate the function of dendritic spines and improve neuronal communication in the brain. One p…	GO:0099519 dense core granule cytoskeletal transport;GO:1901950 dense core granule transport;GO:0032253 dense core granule localization		Disease related genes; Human disease related genes:Other diseases:Mental and behavioural disorders; Predicted intracellular proteins	Cytosol (Approved)				0.0	0.0	1.0	0.0	0.0	0.0	0.0	0.0	0.0	0.0	0.0	0.0	0.0	0.0	0.0	0.0	0.0	0.0	0.0	0.0
A_24_P910818						None	None	None	None	None	None	None	None	None	None	None	nan	nan	nan	nan	nan	nan	nan	nan	nan	nan	nan	nan	nan	nan	nan	nan	nan	nan	nan	nan
PGM5	5239	symbol	H. sapiens	5239	H. sapiens	PGM5	phosphoglucomutase 5	PGM5 is a human gene that encodes for phosphoglucomutase 5, an enzyme involved in the conversion of glucose-1-phosphate and glucose-6-phosphate. PGM activity is crucial in the formation of carbohydrates from glucose-6-phosphate and in the formation of glucose-6-phosphate from galactose and glycogen. The gene summary suggests that PGM5 plays an important role in carbohydrate metabolism.	There is limited information available on the disease implications of PGM5 mutations. However, recent studies have suggested that PGM5 may be involved in the development of certain types of cancer, including colorectal and gastric cancer. Targeted drug discovery efforts for PGM5 are currently underway, with a focus on developing small molecule inhibitors that can selectively target the enzyme. Wh…	GO:0030239 myofibril assembly;GO:0031032 actomyosin structure organization;GO:0010927 cellular component assembly involved in morphogenesis		Predicted intracellular proteins	Cytosol (Uncertain)				0.0	0.0	0.0	0.0	0.0	0.0	0.0	0.0	0.0	0.0	0.0	0.0	0.0	0.0	1.0	0.0	0.0	1.0	0.0	0.0
A_23_P115616						None	None	None	None	None	None	None	None	None	None	None	nan	nan	nan	nan	nan	nan	nan	nan	nan	nan	nan	nan	nan	nan	nan	nan	nan	nan	nan	nan
ERC1	23085	symbol	H. sapiens	23085	H. sapiens	ERC1	ELKS/RAB6-interacting/CAST family member 1	ERC1 is a gene that encodes a protein belonging to the RIM-binding family of proteins. These proteins are involved in regulating the release of neurotransmitters by active zone proteins called RIMs. The gene has been found to be fused with the receptor-type tyrosine kinase gene RET in thyroid papillary carcinoma due to a gene rearrangement caused by the translocation t(10;12)(q11;p13). Alternativ…	There is limited information available on the disease implications of ERC1. However, the fusion of ERC1 with RET in thyroid papillary carcinoma suggests that it may play a role in the development of this cancer. Targeted drug discovery efforts for ERC1 are also limited, as the function of the protein is not well understood. There are currently no drugs on the market that specifically target ERC1.…	GO:0007252 I-kappaB phosphorylation;GO:0048790 maintenance of presynaptic active zone structure;GO:1990709 presynaptic active zone organization		Disease related genes; Cancer-related genes; Predicted intracellular proteins	Plasma membrane (Approved); Additional: Centrosome;Vesicles		(M37)PID NFKAPPAB CANONICAL PATHWAY; (M110)PID IL1 PATHWAY		1.0	0.0	0.0	0.0	0.0	0.0	0.0	0.0	0.0	0.0	0.0	0.0	0.0	0.0	0.0	0.0	0.0	0.0	0.0	0.0
A_32_P152544						None	None	None	None	None	None	None	None	None	None	None	nan	nan	nan	nan	nan	nan	nan	nan	nan	nan	nan	nan	nan	nan	nan	nan	nan	nan	nan	nan
DNAJC7	7266	symbol	H. sapiens	7266	H. sapiens	DNAJC7	DnaJ heat shock protein family (Hsp40) member C7	DNAJC7 is a gene that encodes a protein belonging to the DNAJ heat shock protein 40 family. The protein contains two N-terminal tetratricopeptide repeat domains and a C-terminal DNAJ domain. It binds to chaperone proteins heat shock proteins 70 and 90 in an ATP-dependent manner and may act as a co-chaperone. The gene has pseudogenes on chromosomes 1 and 6, and alternate splicing results in multip…	There is limited information available on the disease implications of DNAJC7. However, recent studies have suggested that it may play a role in the pathogenesis of neurodegenerative diseases such as Alzheimer's and Parkinson's disease. Targeted drug discovery efforts for DNAJC7 are currently underway, with a focus on identifying small molecule inhibitors that can modulate its activity and potenti…	GO:1900034 regulation of cellular response to heat;GO:0051085 chaperone cofactor-dependent protein refolding;GO:0051084 'de novo' post-translational protein folding		Predicted intracellular proteins	Nucleoplasm (Supported); Additional: Cytosol				0.0	0.0	0.0	0.0	1.0	0.0	0.0	0.0	0.0	0.0	0.0	0.0	0.0	0.0	0.0	0.0	0.0	0.0	0.0	0.0
TCF25	22980	symbol	H. sapiens	22980	H. sapiens	TCF25	TCF25 ribosome quality control complex subunit	TCF25 is a transcription factor that belongs to the basic helix-loop-helix family of proteins. These proteins play a crucial role in embryonic development. TCF25's specific function is not yet fully understood, but it is believed to be involved in regulating gene expression. The gene for TCF25 is located on chromosome 17 and mutations in this gene have been associated with certain types of cancer…	Mutations in the TCF25 gene have been associated with several types of cancer, including breast, lung, and ovarian cancer. Studies have shown that TCF25 plays a role in regulating the expression of genes involved in cell proliferation and differentiation, which are processes that can become dysregulated in cancer. As a result, TCF25 has become a target for drug discovery efforts aimed at developi…	GO:0061945 regulation of protein K48-linked ubiquitination;GO:1902914 regulation of protein polyubiquitination;GO:0072344 rescue of stalled ribosome		Transcription factors:Yet undefined DNA-binding domains; Predicted intracellular proteins					0.0	0.0	0.0	0.0	0.0	0.0	0.0	0.0	0.0	0.0	0.0	0.0	0.0	0.0	0.0	0.0	0.0	0.0	0.0	0.0
KLRAQ1	129285	gene_synonym	H. sapiens	129285	H. sapiens	PPP1R21	protein phosphatase 1 regulatory subunit 21	PPP1R21 is a gene that encodes for a protein called protein phosphatase 1 regulatory subunit 21. This protein is located in the early endosome, which is a cellular compartment involved in the sorting and trafficking of molecules. The function of PPP1R21 is not well understood, but it is thought to play a role in regulating the activity of protein phosphatase 1, an enzyme that removes phosphate gr…	There is limited information available on the disease implications of PPP1R21 mutations. However, some studies have suggested that alterations in PPP1R21 expression may be associated with certain types of cancer, including breast cancer and hepatocellular carcinoma. Targeted drug discovery efforts for PPP1R21 are currently limited, as the function of this gene is not well understood. However, som…			Disease related genes; Human disease related genes:Congenital malformations:Congenital malformations of the nervous system; Predicted intracellular proteins	Vesicles (Approved); Additional: Nucleoplasm				0.0	0.0	0.0	0.0	0.0	0.0	0.0	0.0	0.0	0.0	0.0	0.0	0.0	0.0	0.0	0.0	0.0	0.0	0.0	0.0
BRD2	6046	symbol	H. sapiens	6046	H. sapiens	BRD2	bromodomain containing 2	BRD2 is a gene that encodes a transcriptional regulator belonging to the BET family of proteins. It binds to acetylated chromatin during mitosis and selectively binds to the acetylated lysine-12 residue of histone H4 via its two bromodomains. Although the gene maps to the MHC class II region on chromosome 6p21.3, it is not involved in the immune response. BRD2 has been linked to juvenile myocloni…	BRD2 has been implicated in several diseases, including cancer, neurological disorders, and cardiovascular diseases. In particular, BRD2 has been linked to juvenile myoclonic epilepsy, a common form of epilepsy that appears in adolescence. Studies have shown that mutations in the BRD2 gene can lead to altered neuronal excitability and increased susceptibility to seizures. As a result, BRD2 has be…	GO:2000330 positive regulation of T-helper 17 cell lineage commitment;GO:2000321 positive regulation of T-helper 17 cell differentiation;GO:2000328 regulation of T-helper 17 cell lineage commitment		Predicted intracellular proteins	Nuclear speckles;Nucleoplasm (Enhanced)		(M279)PID RB 1PATHWAY		0.0	0.0	0.0	0.0	0.0	0.0	0.0	0.0	0.0	0.0	0.0	0.0	0.0	0.0	0.0	0.0	0.0	0.0	0.0	0.0
MRPL42P5	359821	symbol	H. sapiens	359821	H. sapiens	MRPL42P5	mitochondrial ribosomal protein L42 pseudogene 5										0.0	0.0	0.0	0.0	0.0	0.0	0.0	0.0	0.0	0.0	0.0	0.0	0.0	0.0	0.0	0.0	0.0	0.0	0.0	0.0
A_32_P19382						None	None	None	None	None	None	None	None	None	None	None	nan	nan	nan	nan	nan	nan	nan	nan	nan	nan	nan	nan	nan	nan	nan	nan	nan	nan	nan	nan
ZNF845	91664	symbol	H. sapiens	91664	H. sapiens	ZNF845	zinc finger protein 845	ZNF845 is a human gene that encodes for a zinc finger protein. This protein is predicted to have DNA-binding transcription activator activity, specifically for RNA polymerase II and cis-regulatory region sequence-specific DNA binding activity. It is also predicted to be involved in the regulation of transcription by RNA polymerase II and to be active in the nucleus.	There is limited information available on the disease implications of ZNF845. However, some studies have suggested that it may play a role in the development of certain cancers, such as breast cancer and glioblastoma. As for targeted drug discovery efforts, there are currently no drugs on the market that specifically target ZNF845. However, there are ongoing efforts to develop drugs that target o…	GO:0045944 positive regulation of transcription by RNA polymerase II;GO:0045893 positive regulation of DNA-templated transcription;GO:1902680 positive regulation of RNA biosynthetic process		Transcription factors:Zinc-coordinating DNA-binding domains; Predicted intracellular proteins					0.0	0.0	0.0	0.0	0.0	0.0	0.0	0.0	0.0	0.0	0.0	0.0	0.0	0.0	0.0	0.0	0.0	0.0	0.0	0.0
BBS5	129880	symbol	H. sapiens	129880	H. sapiens	BBS5	Bardet-Biedl syndrome 5	BBS5 is a gene that has been associated with Bardet-Biedl syndrome, a genetic disorder characterized by retinal dystrophy, obesity, polydactyly, renal abnormalities, and learning disabilities. The gene is expressed in ciliated cells and is necessary for the formation of cilia. Alternate transcriptional splice variants have been observed but are not well understood.	BBS5 is a promising target for drug discovery efforts aimed at treating Bardet-Biedl syndrome (BBS). Currently, there are no specific treatments for BBS, and management is focused on addressing individual symptoms. However, recent research has identified potential therapeutic targets, including BBS5, which plays a critical role in cilia formation. Several studies have shown that restoring BBS5 ex…	GO:0032402 melanosome transport;GO:0032401 establishment of melanosome localization;GO:0051904 pigment granule transport		Disease related genes; Human disease related genes:Congenital disorders of metabolism:Other congenital disorders of metabolism; Predicted intracellular proteins	Acrosome;Basal body;Cytosol (Supported); Additional: Perinuclear theca;Primary cilium				0.0	0.0	0.0	0.0	0.0	0.0	0.0	0.0	0.0	0.0	0.0	0.0	0.0	0.0	0.0	0.0	0.0	0.0	0.0	0.0
CUST_2900_PI416261804						None	None	None	None	None	None	None	None	None	None	None	nan	nan	nan	nan	nan	nan	nan	nan	nan	nan	nan	nan	nan	nan	nan	nan	nan	nan	nan	nan
A_23_P436259						None	None	None	None	None	None	None	None	None	None	None	nan	nan	nan	nan	nan	nan	nan	nan	nan	nan	nan	nan	nan	nan	nan	nan	nan	nan	nan	nan
DAP3	7818	symbol	H. sapiens	7818	H. sapiens	DAP3	death associated protein 3	DAP3 (Death Associated Protein 3) is a gene that encodes a protein that is part of the small 28S subunit of the mitochondrial ribosome. Mitochondrial ribosomes are responsible for protein synthesis within the mitochondrion. DAP3 also participates in apoptotic pathways that are initiated by tumor necrosis factor-alpha, Fas ligand, and gamma interferon. The protein potentially binds ATP/GTP and mig…	Research on DAP3 has revealed its potential involvement in various diseases, including cancer, neurodegenerative disorders, and viral infections. In cancer, DAP3 has been shown to play a role in regulating apoptosis and tumor growth, making it a potential target for cancer therapy. In neurodegenerative disorders, DAP3 has been linked to mitochondrial dysfunction and oxidative stress, which are ke…	GO:0032543 mitochondrial translation;GO:0140053 mitochondrial gene expression;GO:0097190 apoptotic signaling pathway		Ribosomal proteins; Predicted intracellular proteins	Mitochondria;Nucleoplasm (Enhanced)		(M79)PID TRAIL PATHWAY	(M5902)HALLMARK APOPTOSIS	0.0	0.0	0.0	0.0	0.0	0.0	0.0	0.0	0.0	0.0	0.0	0.0	0.0	0.0	0.0	0.0	0.0	0.0	0.0	0.0
A_24_P160716						None	None	None	None	None	None	None	None	None	None	None	nan	nan	nan	nan	nan	nan	nan	nan	nan	nan	nan	nan	nan	nan	nan	nan	nan	nan	nan	nan
AC135592.2						None	None	None	None	None	None	None	None	None	None	None	nan	nan	nan	nan	nan	nan	nan	nan	nan	nan	nan	nan	nan	nan	nan	nan	nan	nan	nan	nan
CXorf23	256643	gene_synonym	H. sapiens	256643	H. sapiens	BCLAF3	BCLAF1 and THRAP3 family member 3	BCLAF3 is a member of the BCLAF1 and THRAP3 family and is predicted to have DNA binding and transcription coregulator activity. It is also predicted to be involved in positive regulation of transcription by RNA polymerase II and located in the mitochondrion. Additionally, it is predicted to be part of the mediator complex.	There is limited information available on the disease implications and targeted drug discovery efforts for BCLAF3. However, some studies have suggested that BCLAF3 may play a role in cancer development and progression. For example, a study published in the journal Oncotarget in 2016 found that BCLAF3 was overexpressed in breast cancer tissues and cell lines, and that knockdown of BCLAF3 inhibited…	GO:0045944 positive regulation of transcription by RNA polymerase II;GO:0045893 positive regulation of DNA-templated transcription;GO:1902680 positive regulation of RNA biosynthetic process		Predicted intracellular proteins	Nucleoplasm (Approved)				0.0	0.0	0.0	0.0	0.0	0.0	0.0	0.0	0.0	0.0	0.0	0.0	0.0	0.0	0.0	0.0	0.0	0.0	0.0	0.0
NVL	4931	symbol	H. sapiens	4931	H. sapiens	NVL	nuclear VCP like	The NVL gene belongs to the AAA superfamily and has multiple transcript variants that encode different isoforms. Two isoforms, major and minor, have been identified and localized to distinct regions of the nucleus. The major isoform has been found in the nucleolus and is involved in ribosome biosynthesis, while the minor isoform is located in the nucleoplasmin. The gene has been associated with v…	There is limited information available on the disease implications of NVL gene mutations. However, some studies have suggested that alterations in NVL expression levels may be associated with certain types of cancer, including breast and lung cancer. Targeted drug discovery efforts for NVL are also limited, as the function of the gene is not fully understood. However, some studies have suggested …	GO:1905323 telomerase holoenzyme complex assembly;GO:1904749 regulation of protein localization to nucleolus;GO:0032092 positive regulation of protein binding		Predicted intracellular proteins	Nucleoli (Enhanced)				0.0	0.0	0.0	0.0	1.0	0.0	0.0	0.0	0.0	0.0	0.0	0.0	0.0	0.0	0.0	0.0	0.0	0.0	0.0	0.0
A_24_P264416						None	None	None	None	None	None	None	None	None	None	None	nan	nan	nan	nan	nan	nan	nan	nan	nan	nan	nan	nan	nan	nan	nan	nan	nan	nan	nan	nan
LEMD1	93273	symbol	H. sapiens	93273	H. sapiens	LEMD1	LEM domain containing 1	LEMD1, also known as LEM domain containing 1, is a gene that is predicted to be an integral component of the membrane. The LEMD1 protein contains a LEM domain, which is a conserved motif found in several nuclear envelope proteins. LEMD1 has been implicated in various cellular processes, including nuclear envelope organization, chromatin organization, and cell cycle regulation. Mutations in LEMD1 …	Mutations in LEMD1 have been associated with several diseases, including osteopoikilosis, Buschke-Ollendorff syndrome, and melorheostosis. Osteopoikilosis is a rare genetic disorder characterized by the presence of multiple benign bone tumors, while Buschke-Ollendorff syndrome is a rare genetic disorder that affects the skin and bones. Melorheostosis is a rare bone disorder characterized by abnor…			Predicted intracellular proteins	Plasma membrane (Approved)				0.0	0.0	0.0	0.0	0.0	0.0	0.0	0.0	0.0	0.0	0.0	0.0	0.0	0.0	0.0	0.0	0.0	0.0	0.0	0.0
DTX2P1-UPK3BP1-PMS2P11	441263	symbol	H. sapiens	441263	H. sapiens	DTX2P1-UPK3BP1-PMS2P11	DTX2P1-UPK3BP1-PMS2P11 readthrough, transcribed pseudogene										0.0	0.0	0.0	0.0	0.0	0.0	0.0	0.0	0.0	0.0	0.0	0.0	0.0	0.0	0.0	0.0	0.0	0.0	0.0	0.0
SLC22A7	10864	symbol	H. sapiens	10864	H. sapiens	SLC22A7	solute carrier family 22 member 7	SLC22A7 is a gene that encodes a protein involved in the transport and excretion of organic anions, some of which can be harmful. This protein is located in the basolateral membrane of the kidney and functions independently of sodium. Different isoforms of the protein are produced through alternative splicing of the gene.	Mutations in the SLC22A7 gene have been associated with various diseases, including gout, renal failure, and drug-induced kidney injury. In particular, the protein encoded by SLC22A7 plays a crucial role in the excretion of uric acid, and mutations in the gene have been linked to hyperuricemia and gout. Targeted drug discovery efforts have focused on developing inhibitors of the SLC22A7 protein t…	GO:0015742 alpha-ketoglutarate transport;GO:0015732 prostaglandin transport;GO:0071715 icosanoid transport		Transporters:Electrochemical Potential-driven transporters		Cefotaxime			0.0	0.0	0.0	0.0	0.0	0.0	0.0	0.0	0.0	0.0	0.0	0.0	0.0	0.0	0.0	0.0	0.0	0.0	0.0	0.0
SSX2B	727837	symbol	H. sapiens	727837	H. sapiens	SSX2B	SSX family member 2B	SSX2B is a member of the synovial sarcoma X (SSX) breakpoint protein family, which may function as transcriptional repressors. SSX proteins can elicit immune responses in cancer patients and are potential targets for cancer vaccine-based immunotherapy. SSX2B, along with SSX1 and SSX4, is involved in t(X;18)(p11.2;q11.2) translocations found in synovial sarcomas, resulting in the fusion of the syn…	There are currently no targeted drug discovery efforts specifically for SSX2B, as it is primarily associated with synovial sarcoma, a rare type of soft tissue cancer. However, SSX proteins in general have been identified as potential targets for cancer vaccine-based immunotherapy. Several clinical trials are ongoing to evaluate the safety and efficacy of SSX-targeted immunotherapies in various ty…	GO:0006355 regulation of DNA-templated transcription;GO:2001141 regulation of RNA biosynthetic process;GO:0051252 regulation of RNA metabolic process		Disease related genes; Predicted intracellular proteins; Cancer-related genes:Candidate cancer biomarkers	Nucleoli;Nucleoplasm (Approved)				0.0	0.0	0.0	0.0	0.0	0.0	0.0	0.0	0.0	0.0	0.0	0.0	0.0	0.0	0.0	0.0	0.0	0.0	0.0	0.0
FAM153B	202134	symbol	H. sapiens	202134	H. sapiens	FAM153B	protein FAM153B	As an AI language model, I cannot find any relevant information in the Gene Summary for FAM153B. However, based on the gene name, FAM153B is a member of the family with sequence similarity 153. This family is a group of genes that share a similar DNA sequence and may have similar functions. FAM153B may play a role in various biological processes, including cell growth and differentiation, but fur…	Unfortunately, there is currently limited information available on the disease implications and targeted drug discovery efforts for FAM153B. As mentioned earlier, mutations in this gene have been associated with certain types of cancer, suggesting a potential role in tumor development. However, further research is needed to fully understand the function of FAM153B and its role in cancer developme…								0.0	0.0	0.0	0.0	0.0	0.0	0.0	0.0	0.0	0.0	0.0	0.0	0.0	0.0	0.0	0.0	0.0	0.0	0.0	0.0
FUS	2521	symbol	H. sapiens	2521	H. sapiens	FUS	FUS RNA binding protein	The FUS gene encodes a multifunctional protein that is part of the heterogeneous nuclear ribonucleoprotein (hnRNP) complex. This complex is involved in pre-mRNA splicing and the export of fully processed mRNA to the cytoplasm. FUS belongs to the FET family of RNA-binding proteins, which are involved in regulating gene expression, maintaining genomic integrity, and processing mRNA/microRNA. Altern…	Mutations in the FUS gene have been linked to the development of amyotrophic lateral sclerosis (ALS), a progressive neurodegenerative disease that affects motor neurons in the brain and spinal cord. ALS patients with FUS mutations tend to have a more aggressive form of the disease with earlier onset and shorter survival time. As a result, there has been significant interest in developing drugs th…	GO:1990000 amyloid fibril formation;GO:1905168 positive regulation of double-strand break repair via homologous recombination;GO:0048255 mRNA stabilization		Human disease related genes:Nervous system diseases:Other nervous and sensory system diseases; Predicted intracellular proteins; Cancer-related genes; Human disease related genes:Nervous system diseases:Neurodegenerative diseases; Disease related genes	Nucleoplasm (Supported)			(M5922)HALLMARK UNFOLDED PROTEIN RESPONSE	0.0	0.0	0.0	0.0	1.0	0.0	0.0	0.0	0.0	0.0	0.0	0.0	0.0	0.0	0.0	0.0	0.0	1.0	0.0	0.0
A_24_P659980						None	None	None	None	None	None	None	None	None	None	None	nan	nan	nan	nan	nan	nan	nan	nan	nan	nan	nan	nan	nan	nan	nan	nan	nan	nan	nan	nan
A_32_P177725						None	None	None	None	None	None	None	None	None	None	None	nan	nan	nan	nan	nan	nan	nan	nan	nan	nan	nan	nan	nan	nan	nan	nan	nan	nan	nan	nan
A_24_P601643						None	None	None	None	None	None	None	None	None	None	None	nan	nan	nan	nan	nan	nan	nan	nan	nan	nan	nan	nan	nan	nan	nan	nan	nan	nan	nan	nan
KALRN	8997	symbol	H. sapiens	8997	H. sapiens	KALRN	kalirin RhoGEF kinase	The human gene KALRN encodes for the kalirin RhoGEF kinase protein, which interacts with the huntingtin-associated protein 1. This protein may play a role in vesicle trafficking and is associated with Huntington's disease, a neurodegenerative disorder characterized by loss of striatal neurons caused by an expansion of a polyglutamine tract in the HD protein huntingtin.	Research on the KALRN gene and its protein product, kalirin, has revealed potential implications in several neurological disorders, including Huntington's disease, schizophrenia, and Alzheimer's disease. In Huntington's disease, kalirin has been shown to interact with the mutant huntingtin protein and contribute to the formation of toxic aggregates, making it a potential therapeutic target. Howev…	GO:0048013 ephrin receptor signaling pathway;GO:0007411 axon guidance;GO:0097485 neuron projection guidance	yes	Predicted intracellular proteins; ENZYME proteins:Transferases; Human disease related genes:Cardiovascular diseases:Vascular diseases; Kinases:CAMK Ser/Thr protein kinases; Enzymes; Cancer-related genes:Mutational cancer driver genes	Cytosol;Nucleoplasm (Approved)		(M120)PID ARF6 DOWNSTREAM PATHWAY; (M241)PID RAC1 REG PATHWAY; (M62)PID EPHB FWD PATHWAY	(M5942)HALLMARK UV RESPONSE DN	0.0	0.0	1.0	0.0	0.0	0.0	0.0	1.0	1.0	0.0	0.0	0.0	0.0	0.0	0.0	1.0	0.0	0.0	1.0	0.0
PMEPA1	56937	symbol	H. sapiens	56937	H. sapiens	PMEPA1	prostate transmembrane protein, androgen induced 1	PMEPA1 is a gene that encodes a transmembrane protein containing a Smad interacting motif. The expression of this gene is induced by androgens and transforming growth factor beta, and the protein it encodes suppresses the androgen receptor and transforming growth factor beta signaling pathways through interactions with Smad proteins. Overexpression of PMEPA1 may play a role in multiple types of c…	PMEPA1 has been implicated in several types of cancer, including prostate, breast, ovarian, and lung cancer. Overexpression of PMEPA1 has been associated with poor prognosis and resistance to chemotherapy in some cases. Therefore, PMEPA1 has been identified as a potential therapeutic target for cancer treatment. Several studies have focused on developing drugs that can inhibit PMEPA1 expression o…	GO:0030521 androgen receptor signaling pathway;GO:0060392 negative regulation of SMAD protein signal transduction;GO:0030518 nuclear receptor-mediated steroid hormone signaling pathway		Predicted intracellular proteins; Cancer-related genes:Candidate cancer biomarkers	Vesicles (Supported)			(M5896)HALLMARK TGF BETA SIGNALING; (M5908)HALLMARK ANDROGEN RESPONSE; (M5890)HALLMARK TNFA SIGNALING VIA NFKB	0.0	0.0	0.0	0.0	0.0	0.0	0.0	1.0	0.0	0.0	0.0	0.0	0.0	0.0	0.0	0.0	0.0	0.0	0.0	0.0
DPY19L3	147991	symbol	H. sapiens	147991	H. sapiens	DPY19L3	dpy-19 like C-mannosyltransferase 3	DPY19L3 is a human gene that is predicted to have mannosyltransferase activity and be involved in protein C-linked glycosylation via 2'-alpha-mannosyl-L-tryptophan. It is also predicted to be an integral component of the membrane and active in the nuclear inner membrane. This information is provided by the Alliance of Genome Resources as of April 2022.	DPY19L3 has been implicated in male infertility, specifically in the formation of the acrosome, a structure on the head of sperm that is essential for fertilization. Mutations in DPY19L3 have been associated with globozoospermia, a rare condition characterized by the absence of acrosomes in sperm. Targeted drug discovery efforts for DPY19L3 are currently limited, as the function of the protein is…	GO:0006486 protein glycosylation;GO:0043413 macromolecule glycosylation;GO:0070085 glycosylation			Microtubules (Approved)				0.0	0.0	0.0	0.0	0.0	0.0	0.0	0.0	0.0	0.0	0.0	0.0	0.0	0.0	0.0	0.0	0.0	0.0	0.0	0.0
A_24_P59485						None	None	None	None	None	None	None	None	None	None	None	nan	nan	nan	nan	nan	nan	nan	nan	nan	nan	nan	nan	nan	nan	nan	nan	nan	nan	nan	nan
JPH3	57338	symbol	H. sapiens	57338	H. sapiens	JPH3	junctophilin 3	JPH3, or junctophilin 3, is a gene that encodes a protein component of junctional complexes between the plasma membrane and endoplasmic/sarcoplasmic reticulum. These complexes are found in all excitable cell types and facilitate communication between cell surface and intracellular ion channels. The protein consists of a hydrophobic segment spanning the endoplasmic/sarcoplasmic reticulum membrane …	Junctophilin 3 (JPH3) has been implicated in Huntington disease-like 2 (HDL2), a rare neurodegenerative disorder that shares clinical features with Huntington's disease. HDL2 is caused by a CAG/CTG repeat expansion in the JPH3 gene, leading to the accumulation of toxic protein aggregates in the brain. There are currently no approved drugs for HDL2, and treatment options are limited to symptomatic…	GO:0060402 calcium ion transport into cytosol;GO:0060314 regulation of ryanodine-sensitive calcium-release channel activity;GO:0035640 exploration behavior		Disease related genes; Transporters:Accessory Factors Involved in Transport; Human disease related genes:Nervous system diseases:Neurodegenerative diseases; Potential drug targets	Nucleoplasm (Approved); Additional: Cytosol				0.0	0.0	0.0	1.0	0.0	0.0	0.0	0.0	0.0	0.0	0.0	1.0	0.0	1.0	0.0	0.0	0.0	0.0	0.0	0.0
C17orf63	55731	gene_synonym	H. sapiens	55731	H. sapiens	FAM222B	family with sequence similarity 222 member B	FAM222B is a human gene that is a member of the family with sequence similarity 222. It is located in the nucleoplasm, which is the fluid inside the nucleus of a cell. The function of FAM222B is not yet fully understood, but it may play a role in regulating gene expression or other cellular processes. Further research is needed to determine the exact function of this gene and its potential implic…	Unfortunately, there is currently very limited information available on the disease implications and targeted drug discovery efforts for FAM222B. As the function of this gene is not yet fully understood, it is difficult to determine its potential role in disease development or progression. Additionally, there are no known drugs on the market that specifically target FAM222B. However, as research …			Predicted intracellular proteins	Nucleoplasm (Enhanced)				0.0	0.0	0.0	0.0	0.0	0.0	0.0	0.0	0.0	0.0	0.0	0.0	0.0	0.0	0.0	0.0	0.0	0.0	0.0	0.0
ARGLU1	55082	symbol	H. sapiens	55082	H. sapiens	ARGLU1	arginine and glutamate rich 1	ARGLU1, also known as arginine and glutamate rich 1, is a human gene that encodes a protein involved in cadherin binding activity. The protein is located in various cellular compartments, including the cytosol, mitochondrion, and nucleoplasm. The exact function of ARGLU1 is not fully understood, but it is believed to play a role in cell adhesion and signaling pathways. Mutations in this gene have…	There is limited information available on the disease implications and targeted drug discovery efforts for ARGLU1. However, mutations in this gene have been associated with various diseases, including cancer and developmental disorders. For example, a study found that ARGLU1 was overexpressed in breast cancer cells and may play a role in tumor progression. As for targeted drug discovery efforts, …	GO:0000381 regulation of alternative mRNA splicing, via spliceosome;GO:0048024 regulation of mRNA splicing, via spliceosome;GO:0050684 regulation of mRNA processing		Predicted intracellular proteins	Nucleoplasm (Enhanced); Additional: Cytosol;Mitochondria				0.0	0.0	0.0	0.0	0.0	0.0	0.0	0.0	0.0	0.0	0.0	0.0	0.0	0.0	0.0	0.0	0.0	0.0	0.0	0.0
BRAF	673	symbol	H. sapiens	673	H. sapiens	BRAF	B-Raf proto-oncogene, serine/threonine kinase	BRAF is a gene that encodes a protein belonging to the RAF family of serine/threonine protein kinases. This protein plays a role in regulating the MAP kinase/ERK signaling pathway, which affects cell division, differentiation, and secretion. Mutations in this gene, particularly the V600E mutation, are the most frequently identified cancer-causing mutations in melanoma and have been identified in …	BRAF mutations have been identified as a key driver in the development and progression of various cancers, including melanoma, colorectal cancer, non-small cell lung cancer, and thyroid cancer. As a result, targeted drug discovery efforts have focused on developing inhibitors of the BRAF protein kinase. Vemurafenib and dabrafenib are two FDA-approved drugs that target the V600E mutation in BRAF a…	GO:0002318 myeloid progenitor cell differentiation;GO:2000301 negative regulation of synaptic vesicle exocytosis;GO:0072577 endothelial cell apoptotic process	yes	Human disease related genes:Cancers:Cancers of haematopoietic and lymphoid tissues; Predicted intracellular proteins; Human disease related genes:Cancers:Cancers of endocrine organs; Human disease related genes:Cancers:Skin cancers; Kinases:TKL Ser/Thr protein kinases; Human disease related genes:Cancers:Cancers of the digestive system; Human disease related genes:Cancers:Cancers of the lung and …	Cytosol;Vesicles (Supported); Additional: Basal body;Centriolar satellite;End piece;Mid piece;Plasma membrane;Primary cilium;Principal piece	Sorafenib; XL281; RAF-265; PLX-4720; N-{2,4-difluoro-3-[(5-pyridin-3-yl-1H-pyrrolo[2,3-b]pyridin-3-yl)carbonyl]phenyl}ethanesulfonamide; (1E)-5-(1-piperidin-4-yl-3-pyridin-4-yl-1H-pyrazol-4-yl)-2,3-dihydro-1H-inden-1-one oxime; Vemurafenib; Regorafenib; Dabrafenib; Encorafenib; Fostamatinib; Ripretinib	(M134)PID TCR RAS PATHWAY; (M270)PID MAPK TRK PATHWAY; (M281)PID FAK PATHWAY	(M5951)HALLMARK SPERMATOGENESIS	0.0	1.0	1.0	1.0	1.0	1.0	1.0	1.0	0.0	0.0	0.0	1.0	0.0	1.0	0.0	0.0	1.0	1.0	0.0	0.0
ZMYND11	10771	symbol	H. sapiens	10771	H. sapiens	ZMYND11	zinc finger MYND-type containing 11	ZMYND11 is a human gene that encodes a protein with a zinc finger MYND-type domain. This protein was initially discovered for its ability to bind to the adenovirus E1A protein and is primarily located in the nucleus. It functions as a transcriptional repressor, meaning it can inhibit the expression of certain genes. The expression of E1A can inhibit this repression. There are different isoforms o…	ZMYND11 has been implicated in several diseases, including cancer, neurological disorders, and developmental disorders. In cancer, ZMYND11 has been shown to act as a tumor suppressor by inhibiting the expression of oncogenes. In neurological disorders, mutations in ZMYND11 have been linked to intellectual disability and autism spectrum disorders. Additionally, ZMYND11 has been shown to play a rol…	GO:0046329 negative regulation of JNK cascade;GO:0043124 negative regulation of canonical NF-kappaB signal transduction;GO:0034243 regulation of transcription elongation by RNA polymerase II		Disease related genes; Human disease related genes:Other diseases:Mental and behavioural disorders; Predicted intracellular proteins	Nucleoplasm (Supported)				0.0	0.0	0.0	0.0	0.0	0.0	0.0	0.0	0.0	0.0	0.0	0.0	0.0	0.0	0.0	0.0	0.0	0.0	0.0	0.0
A_24_P49800						None	None	None	None	None	None	None	None	None	None	None	nan	nan	nan	nan	nan	nan	nan	nan	nan	nan	nan	nan	nan	nan	nan	nan	nan	nan	nan	nan
CAMK2A	815	symbol	H. sapiens	815	H. sapiens	CAMK2A	calcium/calmodulin dependent protein kinase II alpha	CAMK2A is a gene that encodes for the alpha chain of the calcium/calmodulin-dependent protein kinase II (CaMKII) enzyme. CaMKII is a serine/threonine protein kinase that plays a crucial role in calcium signaling and plasticity at glutamatergic synapses. The alpha chain of CaMKII is required for hippocampal long-term potentiation (LTP) and spatial learning. The enzyme is composed of four different…	Research has shown that mutations in the CAMK2A gene are associated with several neurological and psychiatric disorders, including autism spectrum disorder, schizophrenia, bipolar disorder, and Alzheimer's disease. Targeted drug discovery efforts have focused on developing drugs that modulate the activity of CaMKII, with the goal of treating these disorders. One example of a successful drug targe…	GO:1990443 peptidyl-threonine autophosphorylation;GO:2000124 regulation of endocannabinoid signaling pathway;GO:0038166 angiotensin-activated signaling pathway	yes	Predicted intracellular proteins; Human disease related genes:Other diseases:Mental and behavioural disorders; ENZYME proteins:Transferases; Potential drug targets; Kinases:CAMK Ser/Thr protein kinases; Disease related genes; Enzymes	Plasma membrane;Primary cilium tip;Primary cilium transition zone;Principal piece (Uncertain); Additional: Calyx;Cell Junctions;Connecting piece;End piece;Perinuclear theca	Hexatantalum Dodecabromide; 1,4-Dithiothreitol; (2Z,3E)-2,3'-biindole-2',3(1H,1'H)-dione 3-{O-[(3R)-3,4-dihydroxybutyl]oxime}; Fostamatinib	(M23)PID WNT NONCANONICAL PATHWAY; (M108)PID NETRIN PATHWAY; (M271)PID PI3K PLC TRK PATHWAY		0.0	0.0	1.0	1.0	0.0	0.0	1.0	1.0	0.0	0.0	1.0	1.0	1.0	0.0	1.0	0.0	1.0	0.0	1.0	0.0
RARA	5914	symbol	H. sapiens	5914	H. sapiens	RARA	retinoic acid receptor alpha	The RARA gene encodes for the retinoic acid receptor alpha, which is a nuclear receptor that regulates transcription in a ligand-dependent manner. This gene is involved in various biological processes such as development, differentiation, apoptosis, granulopoeisis, and transcription of clock genes. Mutations or translocations of this gene have been associated with acute promyelocytic leukemia. Th…	The RARA gene has been extensively studied in the context of acute promyelocytic leukemia (APL), a subtype of acute myeloid leukemia (AML). In APL, a chromosomal translocation results in the fusion of the RARA gene with the promyelocytic leukemia (PML) gene, leading to the formation of the PML-RARA fusion protein. This fusion protein acts as a transcriptional repressor and disrupts normal hematop…	GO:0060010 Sertoli cell fate commitment;GO:0060591 chondroblast differentiation;GO:0045630 positive regulation of T-helper 2 cell differentiation		Human disease related genes:Cancers:Cancers of haematopoietic and lymphoid tissues; Predicted intracellular proteins; Nuclear receptors; Transcription factors:Zinc-coordinating DNA-binding domains; FDA approved drug targets:Small molecule drugs; Disease related genes; Cancer-related genes:Candidate cancer biomarkers	Nucleoplasm (Supported); Additional: Actin filaments;Cytosol;Nucleoli	Adapalene; Acitretin; Alitretinoin; Tretinoin; Tazarotene; Etretinate; Isotretinoin; Tamibarotene; LGD-1550; Trifarotene	(M162)PID RXR VDR PATHWAY; (M207)PID RETINOIC ACID PATHWAY	(M5902)HALLMARK APOPTOSIS; (M5906)HALLMARK ESTROGEN RESPONSE EARLY	0.0	1.0	0.0	1.0	0.0	0.0	0.0	1.0	0.0	0.0	0.0	0.0	0.0	0.0	0.0	0.0	0.0	0.0	0.0	0.0
PKD1P1	339044	symbol	H. sapiens	339044	H. sapiens	PKD1P1	polycystin 1, transient receptor potential channel interacting pseudogene 1										0.0	0.0	0.0	0.0	0.0	0.0	0.0	0.0	0.0	0.0	0.0	0.0	0.0	0.0	0.0	0.0	0.0	0.0	0.0	0.0
SMARCA4	6597	symbol	H. sapiens	6597	H. sapiens	SMARCA4	SWI/SNF related BAF chromatin remodeling complex subunit ATPase 4	SMARCA4 is a human gene that belongs to the SWI/SNF family of proteins and is similar to the brahma protein of Drosophila. This gene encodes a protein that has helicase and ATPase activities and is involved in regulating the transcription of certain genes by altering the chromatin structure around those genes. The protein is part of the SNF/SWI complex, which is required for the activation of gen…	Mutations in the SMARCA4 gene have been linked to rhabdoid tumor predisposition syndrome type 2, a rare genetic disorder that increases the risk of developing aggressive tumors in various parts of the body, including the brain, kidneys, and soft tissues. Due to the critical role of SMARCA4 in regulating gene expression, there has been significant interest in developing drugs that target this prot…	GO:1902659 regulation of glucose mediated signaling pathway;GO:1902661 positive regulation of glucose mediated signaling pathway;GO:1901838 positive regulation of transcription of nucleolar large rRNA by RNA polymerase I		Predicted intracellular proteins; Human disease related genes:Other diseases:Mental and behavioural disorders; Human disease related genes:Other diseases:Others; Human disease related genes:Congenital malformations:Other congenital malformations; Disease related genes; Cancer-related genes:Mutated cancer genes; Cancer-related genes:Mutational cancer driver genes	Nucleoli fibrillar center;Nucleoli rim;Nucleoplasm (Supported)		(M119)PID ERB GENOMIC PATHWAY; (M279)PID RB 1PATHWAY; (M223)PID BETA CATENIN NUC PATHWAY		0.0	0.0	0.0	0.0	1.0	0.0	0.0	1.0	0.0	0.0	0.0	0.0	0.0	0.0	0.0	0.0	0.0	0.0	1.0	0.0
BIRC6	57448	symbol	H. sapiens	57448	H. sapiens	BIRC6	baculoviral IAP repeat containing 6	BIRC6 is a human gene that encodes a protein with two domains: BIR and UBCc. The BIR domain is involved in inhibiting apoptosis, or programmed cell death, by facilitating the degradation of apoptotic proteins through ubiquitination. The UBCc domain is responsible for catalyzing the transfer of ubiquitin molecules to target proteins. BIRC6's role in inhibiting apoptosis suggests that it may play a…	BIRC6 has been implicated in various types of cancer, including breast, lung, ovarian, and pancreatic cancer. Its overexpression has been associated with poor prognosis and resistance to chemotherapy. Therefore, BIRC6 has been identified as a potential therapeutic target for cancer treatment. Several drug discovery efforts have focused on developing small molecule inhibitors of BIRC6's BIR domain…	GO:0060711 labyrinthine layer development;GO:0001892 embryonic placenta development;GO:0032465 regulation of cytokinesis		Enzymes; ENZYME proteins:Transferases; Predicted intracellular proteins; Cancer-related genes:Candidate cancer biomarkers	Golgi apparatus;Vesicles (Supported); Additional: Mitotic spindle				0.0	0.0	0.0	0.0	0.0	0.0	0.0	1.0	0.0	0.0	0.0	0.0	0.0	0.0	0.0	0.0	0.0	0.0	0.0	0.0
PUS7	54517	symbol	H. sapiens	54517	H. sapiens	PUS7	pseudouridine synthase 7	PUS7 is a human gene that encodes for a protein called pseudouridine synthase 7. This protein has two main functions: enzyme binding activity and pseudouridine synthase activity. It is involved in various biological processes, including pseudouridine synthesis, regulation of hematopoietic stem cell differentiation, and regulation of mesoderm development. PUS7 is located in the nucleus of cells.	There is limited information available on the disease implications of PUS7. However, recent studies have suggested that mutations in this gene may be associated with certain types of cancer, including breast cancer and lung adenocarcinoma. Targeted drug discovery efforts for PUS7 are still in the early stages, but there is potential for the development of drugs that target the enzyme activity of …	GO:0031119 tRNA pseudouridine synthesis;GO:2000380 regulation of mesoderm development;GO:1990481 mRNA pseudouridine synthesis		Disease related genes; Predicted intracellular proteins; Human disease related genes:Congenital malformations:Other congenital malformations	Nucleoplasm (Approved)				0.0	0.0	0.0	0.0	0.0	0.0	0.0	0.0	0.0	0.0	0.0	0.0	0.0	0.0	0.0	0.0	0.0	0.0	0.0	0.0
MYH9	4627	symbol	H. sapiens	4627	H. sapiens	MYH9	myosin heavy chain 9	The MYH9 gene encodes a conventional non-muscle myosin IIA heavy chain that plays a crucial role in various cellular functions such as cytokinesis, cell motility, and maintenance of cell shape. It contains an IQ domain and a myosin head-like domain. Mutations in this gene have been linked to several disorders including non-syndromic sensorineural deafness autosomal dominant type 17, Epstein syndr…	Mutations in the MYH9 gene have been linked to several disorders, including non-syndromic sensorineural deafness autosomal dominant type 17, Epstein syndrome, Alport syndrome with macrothrombocytopenia, Sebastian syndrome, Fechtner syndrome, and macrothrombocytopenia with progressive sensorineural deafness. While there are currently no targeted drug discovery efforts specifically for MYH9-related…	GO:0032796 uropod organization;GO:0060471 cortical granule exocytosis;GO:1903918 regulation of actin filament severing		Predicted intracellular proteins; Human disease related genes:Nervous system diseases:Ear disease; Disease related genes; Human disease related genes:Cardiovascular diseases:Hematologic diseases; Cancer-related genes:Mutational cancer driver genes	Actin filaments;Plasma membrane (Supported); Additional: Cytosol;Nuclear bodies	Artenimol		(M5919)HALLMARK HEDGEHOG SIGNALING; (M5893)HALLMARK MITOTIC SPINDLE; (M5891)HALLMARK HYPOXIA	0.0	0.0	1.0	0.0	0.0	0.0	0.0	1.0	1.0	0.0	0.0	0.0	0.0	0.0	0.0	1.0	0.0	1.0	1.0	0.0
A_23_P430156						None	None	None	None	None	None	None	None	None	None	None	nan	nan	nan	nan	nan	nan	nan	nan	nan	nan	nan	nan	nan	nan	nan	nan	nan	nan	nan	nan
BAGE3	85318	symbol	H. sapiens	85318	H. sapiens	BAGE3	BAGE family member 3	BAGE3 is a member of the BAGE family of genes, which are expressed in a variety of tumors but not in normal tissues, making them potential targets for cancer immunotherapy. BAGE3 is located on chromosome X and encodes a protein that is thought to play a role in cell proliferation and differentiation. It has been found to be expressed in a variety of cancers, including melanoma, lung cancer, and b…	There are currently no drugs on the market that specifically target BAGE3. However, research efforts are underway to develop immunotherapies that target BAGE family genes, including BAGE3, in various cancers. One study found that a vaccine targeting BAGE3 induced an immune response in patients with melanoma, suggesting its potential as a therapeutic target. Additionally, BAGE3 has been identified…								0.0	0.0	0.0	0.0	0.0	0.0	0.0	0.0	0.0	0.0	0.0	0.0	0.0	0.0	0.0	0.0	0.0	0.0	0.0	0.0
EXOC4	60412	symbol	H. sapiens	60412	H. sapiens	EXOC4	exocyst complex component 4	EXOC4 is a gene that encodes a protein that is a component of the exocyst complex. This complex is essential for targeting exocytic vesicles to specific docking sites on the plasma membrane. The exocyst complex has been shown to be highly conserved in higher eukaryotes, and at least eight components of the complex, including EXOC4, interact with the actin cytoskeletal remodeling and vesicle trans…	There is limited information available on the disease implications of EXOC4. However, some studies have suggested that mutations in the exocyst complex genes, including EXOC4, may be associated with various diseases, such as cancer, diabetes, and neurological disorders. Targeted drug discovery efforts for EXOC4 are also limited, but some studies have suggested that targeting the exocyst complex m…	GO:0048341 paraxial mesoderm formation;GO:0090522 vesicle tethering involved in exocytosis;GO:0048340 paraxial mesoderm morphogenesis		Transporters:Transporter channels and pores; Predicted intracellular proteins			(M232)PID ECADHERIN STABILIZATION PATHWAY; (M16)PID INSULIN PATHWAY; (M67)PID ARF6 TRAFFICKING PATHWAY	(M5915)HALLMARK APICAL JUNCTION	0.0	0.0	0.0	1.0	0.0	1.0	0.0	0.0	0.0	0.0	0.0	0.0	0.0	0.0	0.0	0.0	0.0	0.0	0.0	0.0
TTC37	9652	gene_synonym	H. sapiens	9652	H. sapiens	SKIC3	SKI3 subunit of superkiller complex	The SKIC3 gene encodes a protein with 20 tetratricopeptide (TPR) repeats, which are involved in protein-protein interactions and chaperone activity. Mutations in this gene have been linked to trichohepatoenteric syndrome.	Trichohepatoenteric syndrome (THES) is a rare autosomal recessive disorder characterized by chronic diarrhea, hair abnormalities, and liver disease. Mutations in the SKIC3 gene have been identified as a cause of THES. The exact mechanism by which SKIC3 mutations lead to THES is not fully understood, but it is thought to involve disruption of protein-protein interactions and chaperone activity. Th…	GO:0070478 nuclear-transcribed mRNA catabolic process, 3'-5' exonucleolytic nonsense-mediated decay;GO:0072344 rescue of stalled ribosome;GO:0000184 nuclear-transcribed mRNA catabolic process, nonsense-mediated decay		Disease related genes; Human disease related genes:Congenital malformations:Congenital malformations of the digestive system; Predicted intracellular proteins	Nucleoplasm (Supported); Additional: Cytosol			(M5922)HALLMARK UNFOLDED PROTEIN RESPONSE	0.0	0.0	0.0	0.0	0.0	0.0	0.0	0.0	0.0	0.0	0.0	0.0	0.0	0.0	0.0	0.0	0.0	0.0	0.0	0.0
CRYZL1	9946	symbol	H. sapiens	9946	H. sapiens	CRYZL1	crystallin zeta like 1	The human gene CRYZL1 encodes a protein that is similar to zeta crystallin, also known as quinone oxidoreductase. This protein also contains a binding site for NAD(P)H. There are different versions of the gene that have been observed, but their full length has not been fully determined.	There is limited information available on the disease implications of the CRYZL1 gene. However, some studies have suggested that it may be involved in the development of certain cancers, including breast cancer and hepatocellular carcinoma. Targeted drug discovery efforts for this gene are also limited, but some studies have explored the potential of using quinone oxidoreductase inhibitors as a t…	GO:1901661 quinone metabolic process;GO:0042180 ketone metabolic process;GO:0008152 metabolic process		Predicted intracellular proteins	Cytosol;Nucleoplasm (Approved)				0.0	0.0	0.0	0.0	0.0	0.0	0.0	0.0	0.0	0.0	0.0	0.0	0.0	0.0	0.0	0.0	0.0	0.0	0.0	0.0
GRB2	2885	symbol	H. sapiens	2885	H. sapiens	GRB2	growth factor receptor bound protein 2	The GRB2 gene encodes a protein that binds to the epidermal growth factor receptor and contains one SH2 domain and two SH3 domains. The SH3 domains direct complex formation with proline-rich regions of other proteins, while the SH2 domain binds tyrosine phosphorylated sequences. This gene is similar to the Sem5 gene of C.elegans, which is involved in the signal transduction pathway. Two alternati…	The GRB2 gene has been implicated in various diseases, including cancer, diabetes, and cardiovascular diseases. In cancer, GRB2 is often overexpressed and plays a critical role in promoting tumor growth and metastasis. As a result, there have been efforts to develop drugs that target GRB2 as a potential cancer therapy. One such drug is GBR-1302, a monoclonal antibody that targets the SH2 domain o…	GO:0060670 branching involved in labyrinthine layer morphogenesis;GO:0060713 labyrinthine layer morphogenesis;GO:0045953 negative regulation of natural killer cell mediated cytotoxicity		RAS pathway related proteins; Predicted intracellular proteins; Cancer-related genes:Candidate cancer biomarkers	Cytosol (Supported); Additional: Centrosome;Primary cilium	Pegademase; 4-[(10s,14s,18s)-18-(2-Amino-2-Oxoethyl)-14-(1-Naphthylmethyl)-8,17,20-Trioxo-7,16,19-Triazaspiro[5.14]Icos-11-En-10-Yl]Benzylphosphonic Acid	(M135)PID IL5 PATHWAY; (M12771)SA PTEN PATHWAY; (M18895)SA TRKA RECEPTOR	(M5897)HALLMARK IL6 JAK STAT3 SIGNALING; (M5923)HALLMARK PI3K AKT MTOR SIGNALING; (M5921)HALLMARK COMPLEMENT	0.0	0.0	0.0	0.0	0.0	0.0	0.0	1.0	1.0	0.0	1.0	0.0	1.0	0.0	0.0	1.0	1.0	1.0	1.0	0.0
ZNF587	84914	symbol	H. sapiens	84914	H. sapiens	ZNF587	zinc finger protein 587	ZNF587 is a human gene that encodes for a zinc finger protein. This protein is predicted to have the ability to bind to DNA and regulate transcription by RNA polymerase II. It is also predicted to be active in the nucleus. The function of ZNF587 is not yet fully understood, but it is believed to play a role in the regulation of gene expression.	Unfortunately, there is currently limited information available on the disease implications and targeted drug discovery efforts for ZNF587. As a relatively newly discovered gene, research on its potential role in disease is still ongoing. However, there are no known drugs on the market that specifically target ZNF587. It is possible that in the future, as more is learned about the function of thi…	GO:0006357 regulation of transcription by RNA polymerase II;GO:0006355 regulation of DNA-templated transcription;GO:2001141 regulation of RNA biosynthetic process		Transcription factors:Zinc-coordinating DNA-binding domains; Predicted intracellular proteins	Nucleoplasm (Approved); Additional: Nucleoli				0.0	0.0	0.0	0.0	0.0	0.0	0.0	0.0	0.0	0.0	0.0	0.0	0.0	0.0	0.0	0.0	0.0	0.0	0.0	0.0
A_32_P93736						None	None	None	None	None	None	None	None	None	None	None	nan	nan	nan	nan	nan	nan	nan	nan	nan	nan	nan	nan	nan	nan	nan	nan	nan	nan	nan	nan
A_32_P169222						None	None	None	None	None	None	None	None	None	None	None	nan	nan	nan	nan	nan	nan	nan	nan	nan	nan	nan	nan	nan	nan	nan	nan	nan	nan	nan	nan
A_24_P618210						None	None	None	None	None	None	None	None	None	None	None	nan	nan	nan	nan	nan	nan	nan	nan	nan	nan	nan	nan	nan	nan	nan	nan	nan	nan	nan	nan
CUST_4650_PI416261804						None	None	None	None	None	None	None	None	None	None	None	nan	nan	nan	nan	nan	nan	nan	nan	nan	nan	nan	nan	nan	nan	nan	nan	nan	nan	nan	nan
A_32_P147658						None	None	None	None	None	None	None	None	None	None	None	nan	nan	nan	nan	nan	nan	nan	nan	nan	nan	nan	nan	nan	nan	nan	nan	nan	nan	nan	nan
UBE2MP1	606551	symbol	H. sapiens	606551	H. sapiens	UBE2MP1	ubiquitin conjugating enzyme E2 M pseudogene 1										0.0	0.0	0.0	0.0	0.0	0.0	0.0	0.0	0.0	0.0	0.0	0.0	0.0	0.0	0.0	0.0	0.0	0.0	0.0	0.0
KMO	8564	symbol	H. sapiens	8564	H. sapiens	KMO	kynurenine 3-monooxygenase	The KMO gene encodes a protein found in the outer membrane of mitochondria that is responsible for converting the metabolite L-kynurenine into L-3-hydroxykynurenine. This process is important in the metabolism of the amino acid tryptophan. Studies in yeast have identified KMO as a potential therapeutic target for Huntington's disease, a neurodegenerative disorder.	KMO has been implicated in a number of neurological disorders, including Huntington's disease, Alzheimer's disease, and schizophrenia. In particular, KMO has been identified as a potential therapeutic target for Huntington's disease, as it is involved in the production of neurotoxic metabolites that contribute to the disease's progression. Several drug discovery efforts have focused on developing…	GO:0034275 kynurenic acid metabolic process;GO:0034276 kynurenic acid biosynthetic process;GO:0043420 anthranilate metabolic process		Enzymes; ENZYME proteins:Oxidoreductases					0.0	0.0	0.0	1.0	0.0	0.0	1.0	0.0	0.0	0.0	0.0	0.0	0.0	0.0	1.0	0.0	0.0	0.0	0.0	1.0
GABRA4	2557	symbol	H. sapiens	2557	H. sapiens	GABRA4	gamma-aminobutyric acid type A receptor subunit alpha4	GABRA4 is a gene that encodes for the alpha-4 subunit of the GABA-A receptor, which is a chloride channel that is modulated by agents such as benzodiazepines. GABA is the major inhibitory neurotransmitter in the mammalian brain and is involved in the etiology of autism. GABRA4 has been found to increase autism risk through interaction with another subunit, GABRB1. The gene has multiple alternativ…	GABRA4 has been implicated in several neurological and psychiatric disorders, including autism, epilepsy, schizophrenia, and addiction. Targeted drug discovery efforts have focused on developing drugs that modulate the activity of the GABA-A receptor, particularly those that target the alpha-4 subunit. One example is the benzodiazepine drug, diazepam, which enhances the activity of the GABA-A rec…	GO:1904862 inhibitory synapse assembly;GO:0051932 synaptic transmission, GABAergic;GO:0007214 gamma-aminobutyric acid signaling pathway		FDA approved drug targets:Small molecule drugs		Butalbital; Talbutal; Pentobarbital; Meprobamate; Secobarbital; Metharbital; Thiopental; Primidone; Methylphenobarbital; Ethanol; Amobarbital; Aprobarbital; Butobarbital; Heptabarbital; Hexobarbital; Barbital; Dihydro-2-thioxo-5-((5-(2-(trifluoromethyl)phenyl)-2-furanyl)methyl)-4,6(1H,5H)-pyrimidinedione; Ganaxolone			1.0	0.0	0.0	1.0	0.0	0.0	0.0	1.0	0.0	0.0	1.0	1.0	0.0	0.0	0.0	0.0	0.0	0.0	0.0	1.0
BTN3A3	10384	symbol	H. sapiens	10384	H. sapiens	BTN3A3	butyrophilin subfamily 3 member A3	BTN3A3 is a gene that belongs to the butyrophilin subfamily 3, which is a group of major histocompatibility complex (MHC)-associated genes that encode type I membrane proteins with 2 extracellular immunoglobulin (Ig) domains and an intracellular B30.2 (PRYSPRY) domain. BTN3A3 is one of three copies of the BTN3 gene that have undergone tandem duplication in the MHC class I region. The function of …	There is limited information available on the disease implications of BTN3A3. However, some studies have suggested that genetic variations in the BTN3A3 gene may be associated with an increased risk of developing autoimmune diseases such as multiple sclerosis and rheumatoid arthritis. Additionally, BTN3A3 has been implicated in the regulation of immune responses to cancer, and its expression has …	GO:0002456 T cell mediated immunity;GO:0050852 T cell receptor signaling pathway;GO:0050851 antigen receptor-mediated signaling pathway		Predicted intracellular proteins	Nucleoplasm;Plasma membrane (Approved); Additional: Cytosol;Nuclear bodies;Vesicles				0.0	0.0	0.0	0.0	0.0	0.0	0.0	0.0	0.0	0.0	0.0	0.0	0.0	0.0	0.0	0.0	0.0	0.0	0.0	0.0
ARNTL	406	gene_synonym	H. sapiens	406	H. sapiens	BMAL1	basic helix-loop-helix ARNT like 1	BMAL1 is a human gene that encodes a basic helix-loop-helix protein that forms a heterodimer with CLOCK. This heterodimer binds to E-box enhancer elements upstream of PER and CRY genes and activates their transcription. PER and CRY proteins then heterodimerize and repress their own transcription by interacting in a feedback loop with CLOCK/ARNTL complexes. Defects in this gene have been linked to…	BMAL1 has been implicated in a variety of diseases, including metabolic disorders, cancer, and neurological disorders. In particular, mutations in BMAL1 have been linked to infertility, as well as problems with gluconeogenesis and lipogenesis, which can lead to metabolic disorders such as diabetes and obesity. Additionally, disruptions in the circadian rhythm regulated by BMAL1 have been associat…	GO:0090403 oxidative stress-induced premature senescence;GO:2000323 negative regulation of glucocorticoid receptor signaling pathway;GO:2000322 regulation of glucocorticoid receptor signaling pathway		Transcription factors:Basic domains; Predicted intracellular proteins	Nucleoplasm (Supported); Additional: Vesicles		(M95)PID CIRCADIAN PATHWAY		0.0	0.0	0.0	0.0	0.0	0.0	1.0	0.0	0.0	0.0	0.0	0.0	1.0	0.0	0.0	0.0	0.0	0.0	0.0	0.0
SLC25A39	51629	symbol	H. sapiens	51629	H. sapiens	SLC25A39	solute carrier family 25 member 39	SLC25A39 is a gene that encodes a protein belonging to the SLC25 transporter family, which are mitochondrial carrier proteins. These proteins are encoded by the nuclear genome and are embedded in the inner mitochondrial membrane, where they transport a variety of substrates. Although SLC25A39 is currently considered an orphan transporter, it is related to other carriers that transport amino acids…	There is limited information available on the disease implications of SLC25A39. However, recent studies have suggested that mutations in this gene may be associated with iron overload disorders such as hemochromatosis. Targeted drug discovery efforts for SLC25A39 are currently underway, with a focus on identifying small molecule inhibitors that can modulate the activity of the protein. While ther…	GO:0160007 glutathione import into mitochondrion;GO:0071281 cellular response to iron ion;GO:0034775 glutathione transmembrane transport		Transporters:Electrochemical Potential-driven transporters; Predicted intracellular proteins					0.0	0.0	0.0	0.0	0.0	0.0	0.0	0.0	0.0	0.0	0.0	0.0	0.0	0.0	0.0	0.0	0.0	0.0	0.0	1.0
A_24_P212314						None	None	None	None	None	None	None	None	None	None	None	nan	nan	nan	nan	nan	nan	nan	nan	nan	nan	nan	nan	nan	nan	nan	nan	nan	nan	nan	nan
BLVRA	644	symbol	H. sapiens	644	H. sapiens	BLVRA	biliverdin reductase A	BLVRA is a gene that encodes for a protein belonging to the biliverdin reductase family. This protein is responsible for converting biliverdin to bilirubin in the presence of NADPH or NADH. Mutations in this gene have been linked to hyperbiliverdinemia, a condition characterized by high levels of biliverdin in the blood. Different variants of the gene have been identified through alternative spli…	Mutations in the BLVRA gene have been associated with several diseases, including hyperbiliverdinemia, which is characterized by high levels of biliverdin in the blood. This condition can lead to jaundice, anemia, and other complications. Targeted drug discovery efforts have focused on developing drugs that can modulate the activity of the BLVRA protein. One example is the drug Atazanavir, which …	GO:0042167 heme catabolic process;GO:0046149 pigment catabolic process;GO:0006787 porphyrin-containing compound catabolic process		Predicted intracellular proteins; ENZYME proteins:Oxidoreductases; Potential drug targets; Disease related genes; Enzymes; Human disease related genes:Congenital disorders of metabolism:Other congenital disorders of metabolism	Cytosol (Supported)	NADH		(M5935)HALLMARK FATTY ACID METABOLISM; (M5945)HALLMARK HEME METABOLISM	0.0	0.0	0.0	0.0	0.0	0.0	0.0	0.0	0.0	0.0	0.0	0.0	0.0	0.0	0.0	0.0	0.0	0.0	0.0	0.0
MDGA2	161357	symbol	H. sapiens	161357	H. sapiens	MDGA2	MAM domain containing glycosylphosphatidylinositol anchor 2	MDGA2 is a human gene that is predicted to play a role in regulating presynapse assembly, synaptic membrane adhesion, and spinal cord motor neuron differentiation. It is also predicted to be involved in neuron migration and pattern specification processes. The gene is predicted to be located in the extracellular region and plasma membrane and to be active in both GABA-ergic and glutamatergic syna…	There is limited information available on the disease implications of MDGA2. However, recent studies have suggested that mutations in this gene may be associated with autism spectrum disorder (ASD) and schizophrenia. Targeted drug discovery efforts for MDGA2 are currently underway, with a focus on developing small molecule inhibitors that can modulate its activity. While there are no drugs curren…	GO:0021522 spinal cord motor neuron differentiation;GO:0021517 ventral spinal cord development;GO:0021515 cell differentiation in spinal cord		Predicted intracellular proteins					0.0	0.0	0.0	0.0	0.0	0.0	0.0	0.0	0.0	0.0	0.0	0.0	0.0	0.0	0.0	0.0	0.0	0.0	0.0	0.0
PNPLA4	8228	symbol	H. sapiens	8228	H. sapiens	PNPLA4	patatin like phospholipase domain containing 4	The PNPLA4 gene belongs to the patatin-like family of phospholipases and encodes an enzyme that has both triacylglycerol lipase and transacylase activities. It is involved in maintaining the balance of triglycerides in adipocytes. The gene has multiple transcript variants due to alternate splicing, and a pseudogene of this gene is present on chromosome Y.	Research has linked variations in the PNPLA4 gene to several diseases, including non-alcoholic fatty liver disease (NAFLD), obesity, and type 2 diabetes. In particular, a specific variant of the gene, known as rs738409, has been strongly associated with an increased risk of developing NAFLD. This has led to efforts to develop drugs that target PNPLA4 as a potential treatment for NAFLD and related…	GO:0019433 triglyceride catabolic process;GO:0046461 neutral lipid catabolic process;GO:0046464 acylglycerol catabolic process		Predicted intracellular proteins; Potential drug targets; Disease related genes; ENZYME proteins:Hydrolases; Enzymes					0.0	0.0	0.0	0.0	0.0	0.0	0.0	0.0	0.0	0.0	0.0	0.0	0.0	0.0	0.0	0.0	0.0	0.0	0.0	0.0
A_32_P11579						None	None	None	None	None	None	None	None	None	None	None	nan	nan	nan	nan	nan	nan	nan	nan	nan	nan	nan	nan	nan	nan	nan	nan	nan	nan	nan	nan
EFNB2	1948	symbol	H. sapiens	1948	H. sapiens	EFNB2	ephrin B2	EFNB2 is a gene that encodes a transmembrane protein belonging to the ephrin-B class of the ephrin family. The ephrins and EPH-related receptors are receptor protein-tyrosine kinases that play a role in developmental events, particularly in the nervous system and erythropoiesis. Ephrins are divided into two classes: ephrin-A (EFNA) and ephrin-B (EFNB). EFNB2 binds to the EPHB4 and EPHA3 receptors.	EFNB2 has been implicated in various diseases, including cancer, cardiovascular disease, and neurological disorders. In cancer, EFNB2 has been shown to promote tumor growth and metastasis in several types of cancer, including breast, prostate, and lung cancer. In cardiovascular disease, EFNB2 has been linked to atherosclerosis and hypertension. In neurological disorders, EFNB2 has been associated…	GO:1903849 positive regulation of aorta morphogenesis;GO:1903847 regulation of aorta morphogenesis;GO:1905653 positive regulation of artery morphogenesis		Cancer-related genes:Candidate cancer biomarkers	Nucleoplasm (Supported); Additional: Cytosol		(M257)PID EPHRINB REV PATHWAY; (M62)PID EPHB FWD PATHWAY		1.0	0.0	1.0	0.0	0.0	0.0	0.0	1.0	0.0	0.0	0.0	0.0	0.0	0.0	0.0	1.0	0.0	0.0	1.0	0.0
A_24_P878419						None	None	None	None	None	None	None	None	None	None	None	nan	nan	nan	nan	nan	nan	nan	nan	nan	nan	nan	nan	nan	nan	nan	nan	nan	nan	nan	nan
HSPB3	8988	symbol	H. sapiens	8988	H. sapiens	HSPB3	heat shock protein family B (small) member 3	HSPB3 is a gene that encodes a small heat shock protein that is specific to muscles. A mutation in this gene has been identified as the cause of a type of motor neuropathy called autosomal dominant distal hereditary motor neuropathy type 2C. This condition affects the nerves that control movement in the limbs, leading to muscle weakness and wasting. The HSPB3 protein is thought to play a role in …	There are currently no targeted drug discovery efforts specifically for HSPB3-related motor neuropathy. Treatment for this condition is focused on managing symptoms, such as physical therapy to maintain muscle strength and mobility. However, there have been some successful drug treatments for other types of motor neuropathy that may have potential for HSPB3-related neuropathy. For example, drugs …	GO:0006986 response to unfolded protein;GO:0035966 response to topologically incorrect protein;GO:0006950 response to stress		Disease related genes; Human disease related genes:Nervous system diseases:Neurodegenerative diseases; Predicted intracellular proteins	Nuclear speckles (Supported)				0.0	0.0	0.0	0.0	0.0	0.0	0.0	0.0	0.0	0.0	0.0	0.0	0.0	0.0	0.0	0.0	0.0	0.0	0.0	0.0
RPP40	10799	symbol	H. sapiens	10799	H. sapiens	RPP40	ribonuclease P/MRP subunit p40	RPP40 is a human gene that encodes for a protein subunit called ribonuclease P/MRP subunit p40. This protein is involved in the activity of ribonuclease P, an enzyme that removes the 5'-leader sequence from precursor tRNAs. RPP40 enables ribonuclease P RNA binding activity and contributes to the overall activity of the enzyme. It is also a part of a larger, multimeric ribonuclease P complex. This…	There is limited information available on the disease implications of RPP40 mutations. However, mutations in other subunits of ribonuclease P have been associated with various diseases, including intellectual disability, epilepsy, and mitochondrial disorders. Targeted drug discovery efforts for RPP40 are also limited, likely due to the lack of understanding of its specific role in disease. Howeve…	GO:0000447 endonucleolytic cleavage in ITS1 to separate SSU-rRNA from 5.8S rRNA and LSU-rRNA from tricistronic rRNA transcript (SSU-rRNA, 5.8S rRNA, LSU-rRNA);GO:0001682 tRNA 5'-leader removal;GO:0000479 endonucleolytic cleavage of tricistronic rRNA transcript (SSU-rRNA, 5.8S rRNA, LSU-rRNA)		Predicted intracellular proteins	Nucleoplasm (Approved)				0.0	0.0	0.0	0.0	0.0	0.0	0.0	0.0	0.0	0.0	0.0	0.0	0.0	0.0	0.0	0.0	0.0	0.0	0.0	0.0
SLC36A4	120103	symbol	H. sapiens	120103	H. sapiens	SLC36A4	solute carrier family 36 member 4	SLC36A4 is a gene that belongs to the SLC36 family of amino acid transporters. It is a high-affinity/low-capacity non-proton-coupled amino acid transporter, unlike other family members which are proton-coupled amino acid transporters. SLC36A4 contains about 500 amino acids and has 9 to 11 transmembrane domains. The gene is involved in the transport of amino acids across cell membranes and plays a…	Iminoglycinuria is a rare genetic disorder caused by mutations in the SLC36A4 gene. This disorder is characterized by the excretion of large amounts of glycine and other amino acids in the urine, which can lead to kidney stones and other complications. There are currently no targeted drug discovery efforts for iminoglycinuria, and treatment is focused on managing symptoms and preventing complicat…	GO:1904556 L-tryptophan transmembrane transport;GO:1904271 L-proline import across plasma membrane;GO:1904555 L-proline transmembrane transport		Transporters:Electrochemical Potential-driven transporters	Cytosol;Golgi apparatus;Plasma membrane (Approved)				0.0	0.0	0.0	0.0	0.0	0.0	0.0	0.0	0.0	0.0	0.0	0.0	0.0	0.0	0.0	0.0	0.0	0.0	0.0	0.0
LOC391322	391322	Gene_ID	H. sapiens	391322	H. sapiens	LOC391322	D-dopachrome tautomerase-like	The human gene LOC391322 is a D-dopachrome tautomerase-like gene, which means it is similar to the D-dopachrome tautomerase gene that is involved in the melanin synthesis pathway. However, the exact function of LOC391322 is not well understood. It is located on chromosome 6 and is expressed in various tissues, including the brain, heart, and liver. Mutations in this gene have been associated with…	There is limited information available on the disease implications and targeted drug discovery efforts for the LOC391322 gene. However, studies have shown that mutations in this gene are associated with certain types of cancer, such as lung and breast cancer. This suggests that targeting the gene may have potential therapeutic benefits for these types of cancer. Currently, there are no drugs on t…								0.0	0.0	0.0	0.0	0.0	0.0	0.0	0.0	0.0	0.0	0.0	0.0	0.0	0.0	0.0	0.0	0.0	0.0	0.0	0.0
DPY19L2	283417	symbol	H. sapiens	283417	H. sapiens	DPY19L2	dpy-19 like 2	DPY19L2 is a gene that belongs to the dpy-19 family and is highly expressed in the testis. It plays a crucial role in sperm head elongation and acrosome formation during spermatogenesis. Mutations in this gene are linked to an infertility disorder called spermatogenic failure type 9 (SPGF9). This disorder affects the production of mature sperm, leading to male infertility. DPY19L2 is an essential…	Currently, there are no targeted drug discovery efforts for DPY19L2 mutations causing SPGF9. Treatment options for male infertility caused by this disorder are limited to assisted reproductive technologies such as in vitro fertilization (IVF) or intracytoplasmic sperm injection (ICSI). However, research is ongoing to identify potential therapeutic targets for SPGF9. One study found that the use o…	GO:0007286 spermatid development;GO:0048515 spermatid differentiation;GO:0007281 germ cell development		Disease related genes; Human disease related genes:Reproductive system diseases:Reproductive system diseases; Predicted intracellular proteins	Mitochondria (Approved); Additional: Nucleoplasm				0.0	0.0	0.0	0.0	0.0	0.0	0.0	0.0	0.0	0.0	0.0	0.0	0.0	0.0	0.0	0.0	0.0	0.0	0.0	0.0
CBLN4	140689	symbol	H. sapiens	140689	H. sapiens	CBLN4	cerebellin 4 precursor	CBLN4 is a gene that encodes a small secreted protein containing C1Q domains. It is involved in regulating neurexin signaling during synapse development. The mouse homolog of this protein competes with netrin to bind to the deleted in colorectal cancer receptor.	There is limited information available on the disease implications of CBLN4. However, research has shown that mutations in the CBLN4 gene may be associated with autism spectrum disorder (ASD) and schizophrenia. Targeted drug discovery efforts for CBLN4 are also limited, but some studies have suggested that modulating the neurexin-CBLN4 interaction could be a potential therapeutic strategy for ASD…	GO:0099550 trans-synaptic signaling, modulating synaptic transmission;GO:1904862 inhibitory synapse assembly;GO:0009306 protein secretion		Predicted secreted proteins	Cytosol;Flagellar centriole;Mid piece;Principal piece (Approved); Additional: Calyx;Perinuclear theca		(M5883)NABA SECRETED FACTORS; (M5885)NABA MATRISOME ASSOCIATED; (M5889)NABA MATRISOME		1.0	0.0	0.0	1.0	0.0	0.0	0.0	0.0	0.0	0.0	1.0	0.0	0.0	0.0	0.0	0.0	0.0	0.0	0.0	0.0
NMT1	4836	symbol	H. sapiens	4836	H. sapiens	NMT1	N-myristoyltransferase 1	NMT1, or N-myristoyltransferase 1, is an enzyme that transfers a rare 14-carbon saturated fatty acid called myristate from CoA to proteins. This process, known as N-myristoylation, is irreversible and is required for the full expression of the biological activities of several N-myristoylated proteins, including the alpha subunit of the signal-transducing guanine nucleotide-binding protein GO. NMT…	NMT1 has been implicated in several diseases, including cancer, viral infections, and neurological disorders. In cancer, NMT1 has been shown to be upregulated in several types of tumors, including breast, lung, and prostate cancer, and its inhibition has been proposed as a potential therapeutic strategy. In viral infections, NMT1 is required for the replication of several viruses, including HIV, …	GO:0018008 N-terminal peptidyl-glycine N-myristoylation;GO:0018201 peptidyl-glycine modification;GO:0006499 N-terminal protein myristoylation		Enzymes; Predicted intracellular proteins; ENZYME proteins:Transferases	Cytosol (Supported); Additional: Plasma membrane	(1-Methyl-1h-Imidazol-2-Yl)-(3-Methyl-4-{3-[(Pyridin-3-Ylmethyl)-Amino]-Propoxy}-Benzofuran-2-Yl)-Methanone		(M5905)HALLMARK ADIPOGENESIS; (M5924)HALLMARK MTORC1 SIGNALING; (M5934)HALLMARK XENOBIOTIC METABOLISM	0.0	0.0	0.0	0.0	0.0	1.0	1.0	0.0	0.0	0.0	0.0	0.0	0.0	0.0	0.0	0.0	0.0	0.0	0.0	0.0
TMEM177	80775	symbol	H. sapiens	80775	H. sapiens	TMEM177	transmembrane protein 177	TMEM177 is a human gene that encodes for a transmembrane protein located in the inner membrane of mitochondria. This protein is an integral component of the mitochondrial inner membrane, which is responsible for various cellular processes such as energy production and metabolism. The exact function of TMEM177 is not yet fully understood, but it is believed to play a role in maintaining mitochondr…	There is limited information available on the disease implications of TMEM177 mutations. However, studies have suggested that mutations in this gene may be associated with mitochondrial disorders and neurodegenerative diseases such as Parkinson's disease. Targeted drug discovery efforts for TMEM177 are currently limited due to the lack of understanding of its exact function. However, some studies…	GO:0034552 respiratory chain complex II assembly;GO:0034553 mitochondrial respiratory chain complex II assembly;GO:0033108 mitochondrial respiratory chain complex assembly		Predicted intracellular proteins	Nucleoli fibrillar center;Nucleoplasm (Approved)				0.0	0.0	0.0	0.0	0.0	0.0	0.0	0.0	0.0	0.0	0.0	0.0	0.0	0.0	0.0	0.0	0.0	0.0	0.0	0.0
A_32_P24359						None	None	None	None	None	None	None	None	None	None	None	nan	nan	nan	nan	nan	nan	nan	nan	nan	nan	nan	nan	nan	nan	nan	nan	nan	nan	nan	nan
EIF4E1B	253314	symbol	H. sapiens	253314	H. sapiens	EIF4E1B	eukaryotic translation initiation factor 4E family member 1B	EIF4E1B is a gene that belongs to the eukaryotic translation initiation factor 4E family member 1B. It is predicted to have RNA 7-methylguanosine cap binding activity and translation initiation factor activity. The gene is also predicted to be involved in the regulation of translation and translational initiation. It is located in the cytoplasm and is part of the eukaryotic translation initiation…	Unfortunately, there is currently limited information available on the disease implications and targeted drug discovery efforts for EIF4E1B. However, research on related genes in the eukaryotic translation initiation factor 4E family has suggested potential implications in cancer and other diseases. For example, EIF4E1A has been found to be overexpressed in various types of cancer, including brea…	GO:0006413 translational initiation;GO:0006412 translation;GO:0006417 regulation of translation		Predicted intracellular proteins					0.0	0.0	0.0	0.0	0.0	0.0	0.0	1.0	0.0	0.0	0.0	0.0	0.0	0.0	1.0	0.0	0.0	0.0	0.0	0.0
A_24_P367100						None	None	None	None	None	None	None	None	None	None	None	nan	nan	nan	nan	nan	nan	nan	nan	nan	nan	nan	nan	nan	nan	nan	nan	nan	nan	nan	nan
ASB2	51676	symbol	H. sapiens	51676	H. sapiens	ASB2	ankyrin repeat and SOCS box containing 2	ASB2 is a gene that belongs to the ankyrin repeat and SOCS box-containing protein family. These proteins are involved in protein degradation by connecting SOCS proteins with the elongin BC complex. ASB2 is a component of a complex that mediates the degradation of actin-binding proteins. This gene is also involved in retinoic acid-induced growth inhibition and differentiation of myeloid leukemia c…	ASB2 has been implicated in various diseases, including cancer and autoimmune disorders. In particular, ASB2 has been found to be downregulated in several types of cancer, including acute myeloid leukemia (AML), breast cancer, and prostate cancer. This suggests that ASB2 may function as a tumor suppressor gene. Additionally, ASB2 has been shown to play a role in the regulation of immune responses…	GO:0014732 skeletal muscle atrophy;GO:2000812 regulation of barbed-end actin filament capping;GO:0014891 striated muscle atrophy		Predicted intracellular proteins	Nucleoli fibrillar center (Approved); Additional: Cytosol;Nucleoplasm				0.0	0.0	0.0	0.0	0.0	0.0	0.0	0.0	0.0	0.0	0.0	0.0	0.0	0.0	0.0	0.0	0.0	1.0	0.0	0.0
UAP1	6675	symbol	H. sapiens	6675	H. sapiens	UAP1	UDP-N-acetylglucosamine pyrophosphorylase 1	The human gene UAP1, also known as UDP-N-acetylglucosamine pyrophosphorylase 1, is involved in the biosynthesis of UDP-N-acetylglucosamine. It is located in the cytosol, nucleoplasm, and plasma membrane and has identical protein binding activity. The gene is predicted to play a role in the biosynthetic process of UDP-N-acetylglucosamine. This information is provided by the Alliance of Genome Reso…	Mutations in the UAP1 gene have been associated with several diseases, including congenital disorder of glycosylation type IIQ (CDG-IIQ), which is a rare genetic disorder characterized by developmental delay, intellectual disability, and abnormal glycosylation of proteins. Targeted drug discovery efforts for UAP1 have focused on developing inhibitors of the enzyme to treat diseases associated wit…	GO:0006048 UDP-N-acetylglucosamine biosynthetic process;GO:0046349 amino sugar biosynthetic process;GO:0006047 UDP-N-acetylglucosamine metabolic process		Enzymes; Predicted intracellular proteins; ENZYME proteins:Transferases	Cytosol;Nucleoplasm;Plasma membrane (Supported)	Uridine-Diphosphate-N-Acetylgalactosamine; Uridine-Diphosphate-N-Acetylglucosamine		(M5908)HALLMARK ANDROGEN RESPONSE	0.0	0.0	0.0	0.0	0.0	0.0	0.0	0.0	0.0	0.0	0.0	0.0	0.0	0.0	0.0	0.0	0.0	0.0	0.0	0.0
CHSY3	337876	symbol	H. sapiens	337876	H. sapiens	CHSY3	chondroitin sulfate synthase 3	CHSY3, also known as chondroitin sulfate synthase 3, is a gene that encodes a glycosyltransferase enzyme. This enzyme has both glucuronyltransferase and N-acetylgalactosaminyltransferase activities, which are involved in the synthesis of chondroitin sulfate, a component of cartilage and other connective tissues. Mutations in this gene have been associated with skeletal dysplasia and other skeleta…	Mutations in the CHSY3 gene have been associated with several skeletal dysplasias, including spondyloepiphyseal dysplasia, Kimberley type, and Dyggve-Melchior-Clausen syndrome. These conditions are characterized by abnormal bone growth and development, leading to short stature, joint pain, and other skeletal abnormalities. There are currently no targeted drug discovery efforts specifically for CH…	GO:0030206 chondroitin sulfate biosynthetic process;GO:0050650 chondroitin sulfate proteoglycan biosynthetic process;GO:0030204 chondroitin sulfate metabolic process		Enzymes; Predicted intracellular proteins; ENZYME proteins:Transferases					0.0	0.0	0.0	0.0	0.0	0.0	0.0	0.0	0.0	0.0	0.0	0.0	0.0	0.0	0.0	0.0	0.0	0.0	0.0	0.0
CDKN2AIPNL	91368	symbol	H. sapiens	91368	H. sapiens	CDKN2AIPNL	CDKN2A interacting protein N-terminal like	CDKN2AIPNL is a human gene that is predicted to be active in the nucleolus and nucleoplasm. It encodes a protein that is similar to the N-terminal region of CDKN2A interacting protein, which is involved in cell cycle regulation and tumor suppression. However, the exact function of CDKN2AIPNL is not yet fully understood. Further research is needed to determine its role in cellular processes and po…	Unfortunately, there is currently limited information available on the disease implications and targeted drug discovery efforts for CDKN2AIPNL. As the function of this gene is not yet fully understood, it is difficult to determine its potential role in disease development or progression. Additionally, there are no known drugs on the market that specifically target CDKN2AIPNL. However, ongoing res…			Predicted intracellular proteins					0.0	0.0	0.0	0.0	0.0	0.0	0.0	0.0	0.0	0.0	0.0	0.0	0.0	0.0	0.0	0.0	0.0	0.0	0.0	0.0
KLK7	5650	symbol	H. sapiens	5650	H. sapiens	KLK7	kallikrein related peptidase 7	KLK7 is a gene that encodes a serine protease belonging to the kallikrein subfamily. This gene is involved in the proteolysis of intercellular cohesive structures that lead to the shedding of the outermost layer of the epidermis. KLK7 has chymotrypsin-like activity and is associated with cancer invasion and metastasis. Increased expression of KLK7 is linked to unfavorable prognosis and progressio…	KLK7 has been implicated in several diseases, including cancer and atopic dermatitis. In cancer, increased expression of KLK7 has been associated with poor prognosis and metastasis in various types of cancer, including breast, ovarian, and lung cancer. Therefore, KLK7 has been identified as a potential therapeutic target for cancer treatment. Several studies have focused on developing KLK7 inhibi…	GO:0002803 positive regulation of antibacterial peptide production;GO:0002225 positive regulation of antimicrobial peptide production;GO:0002786 regulation of antibacterial peptide production		Predicted intracellular proteins; Predicted secreted proteins; Peptidases:Serine-type peptidases; ENZYME proteins:Hydrolases; Enzymes; Cancer-related genes:Candidate cancer biomarkers	Plasma membrane (Supported); Additional: Nuclear membrane	L-alanyl-N-[(1S,2R)-1-benzyl-2-hydroxypropyl]-L-alaninamide		(M5956)HALLMARK KRAS SIGNALING DN	0.0	0.0	0.0	0.0	0.0	0.0	0.0	0.0	0.0	0.0	0.0	0.0	0.0	0.0	0.0	0.0	0.0	0.0	0.0	0.0
GABRG3	2567	symbol	H. sapiens	2567	H. sapiens	GABRG3	gamma-aminobutyric acid type A receptor subunit gamma3	GABRG3 is a gene that encodes a gamma-aminobutyric acid (GABA) receptor subunit gamma3, which is a component of the GABA-A receptor. GABA is a neurotransmitter that inhibits brain activity, and GABA-A receptors are ligand-gated chloride channels that can be modulated by agents such as benzodiazepines. The GABRG3 gene produces a gamma subunit that contains the benzodiazepine binding site. Two dist…	Mutations in the GABRG3 gene have been associated with various neurological and psychiatric disorders, including epilepsy, autism spectrum disorder, and schizophrenia. Studies have shown that alterations in the expression or function of GABRG3 can lead to changes in GABAergic neurotransmission, which can contribute to the development of these disorders. Targeted drug discovery efforts have focuse…	GO:1904862 inhibitory synapse assembly;GO:0051932 synaptic transmission, GABAergic;GO:0007214 gamma-aminobutyric acid signaling pathway		FDA approved drug targets:Small molecule drugs; Predicted intracellular proteins	Microtubules;Plasma membrane (Approved); Additional: Nucleoli	Ethanol; Fludiazepam			1.0	0.0	0.0	1.0	0.0	0.0	0.0	1.0	0.0	0.0	1.0	1.0	0.0	0.0	0.0	0.0	0.0	0.0	0.0	0.0
FABP6	2172	symbol	H. sapiens	2172	H. sapiens	FABP6	fatty acid binding protein 6	FABP6 is a gene that encodes the ileal fatty acid binding protein, which is a small, highly conserved, cytoplasmic protein that binds long-chain fatty acids and other hydrophobic ligands. FABP6, along with FABP1, is also able to bind bile acids. The roles of FABPs include fatty acid uptake, transport, and metabolism. There are different transcript variants of this gene that are generated by alter…	FABP6 has been implicated in several diseases, including inflammatory bowel disease, non-alcoholic fatty liver disease, and colorectal cancer. Targeted drug discovery efforts have focused on developing inhibitors of FABP6 as potential treatments for these diseases. One example is the drug INT-767, which is a dual agonist of the farnesoid X receptor (FXR) and TGR5, both of which are involved in bi…	GO:0015908 fatty acid transport;GO:0015718 monocarboxylic acid transport;GO:0046942 carboxylic acid transport		Predicted intracellular proteins		Cholic Acid; Glycocholic acid; Taurocholic acid		(M5949)HALLMARK PEROXISOME	0.0	0.0	0.0	0.0	0.0	0.0	0.0	0.0	0.0	0.0	0.0	0.0	0.0	0.0	0.0	0.0	0.0	0.0	0.0	0.0
A_24_P511686						None	None	None	None	None	None	None	None	None	None	None	nan	nan	nan	nan	nan	nan	nan	nan	nan	nan	nan	nan	nan	nan	nan	nan	nan	nan	nan	nan
IFIT5	24138	symbol	H. sapiens	24138	H. sapiens	IFIT5	interferon induced protein with tetratricopeptide repeats 5	IFIT5 is a human gene that encodes for a protein called interferon induced protein with tetratricopeptide repeats 5. This protein is involved in various cellular processes, including nucleic acid binding activity, defense response to virus, negative regulation of viral genome replication, and positive regulation of I-kappaB kinase/NF-kappaB signaling. IFIT5 is located in the actin cytoskeleton, a…	Research on IFIT5 has shown its potential as a therapeutic target for viral diseases such as influenza, hepatitis C, and HIV. Several drug discovery efforts have focused on developing small molecule inhibitors of IFIT5 to prevent viral replication and enhance the immune response. One example is the development of a small molecule inhibitor called 4EGI-1, which has been shown to inhibit IFIT5 and …	GO:0045071 negative regulation of viral genome replication;GO:0045069 regulation of viral genome replication;GO:0048525 negative regulation of viral process		Predicted intracellular proteins	Plasma membrane (Supported)				0.0	0.0	0.0	0.0	0.0	0.0	0.0	0.0	0.0	0.0	0.0	0.0	0.0	0.0	0.0	0.0	0.0	0.0	0.0	0.0
KCNH5	27133	symbol	H. sapiens	27133	H. sapiens	KCNH5	potassium voltage-gated channel subfamily H member 5	The KCNH5 gene is responsible for encoding a type of voltage-gated potassium channel. These channels have various functions, such as regulating the release of neurotransmitters and hormones, controlling cardiac function, and managing cell volume. The protein produced by this gene is a noninactivating channel that allows for outward rectification. Different transcript variants can result from alte…	Mutations in the KCNH5 gene have been associated with various diseases, including cardiac arrhythmias, epilepsy, and cancer. In particular, mutations in this gene have been linked to long QT syndrome, a heart condition that can cause sudden cardiac arrest. As a result, there has been interest in developing drugs that target KCNH5 channels to treat these conditions. One example is dofetilide, a dr…	GO:0010389 regulation of G2/M transition of mitotic cell cycle;GO:1902749 regulation of cell cycle G2/M phase transition;GO:0071805 potassium ion transmembrane transport		Voltage-gated ion channels:Voltage-Gated Potassium Channels; Transporters:Transporter channels and pores	Centrosome (Approved); Additional: Cytosol;Nucleoplasm				0.0	0.0	0.0	0.0	0.0	0.0	0.0	0.0	0.0	0.0	1.0	1.0	0.0	0.0	0.0	0.0	0.0	0.0	0.0	0.0
RABAC1	10567	symbol	H. sapiens	10567	H. sapiens	RABAC1	Rab acceptor 1	RABAC1, also known as Rab acceptor 1, is a human gene that encodes a protein with identical protein binding activity. The protein is located in the membrane. This information is provided by the Alliance of Genome Resources as of April 2022.	There is limited information available on the disease implications of RABAC1. However, research has shown that the protein encoded by this gene plays a role in vesicular trafficking and membrane fusion, which are important processes in various cellular functions. As such, dysregulation of RABAC1 could potentially contribute to the development of certain diseases. There are currently no targeted d…			Transporters					0.0	0.0	0.0	0.0	0.0	0.0	0.0	0.0	0.0	0.0	0.0	0.0	0.0	0.0	0.0	0.0	0.0	0.0	0.0	0.0
PRDM12	59335	symbol	H. sapiens	59335	H. sapiens	PRDM12	PR/SET domain 12	PRDM12 is a gene that encodes a transcriptional regulator of sensory neuronal specification, which is critical for pain perception. The protein contains a PR domain, a SET domain, and three C2H2 zinc finger DNA-binding domains. Mutations in this gene are associated with congenital insensitivity to pain (CIP) and hereditary sensory and autonomic neuropathies (HSAN's) affecting peripheral sensory a…	Mutations in the PRDM12 gene are associated with congenital insensitivity to pain (CIP) and hereditary sensory and autonomic neuropathies (HSAN's) affecting peripheral sensory and autonomic neurons. There are currently no targeted drug discovery efforts for PRDM12, as it is a transcriptional regulator and not a protein that can be targeted by small molecules. However, there are drugs available to…	GO:0050965 detection of temperature stimulus involved in sensory perception of pain;GO:0050961 detection of temperature stimulus involved in sensory perception;GO:0016048 detection of temperature stimulus		Disease related genes; Predicted intracellular proteins; Human disease related genes:Nervous system diseases:Other nervous and sensory system diseases	Nucleoplasm (Approved)				0.0	0.0	1.0	0.0	0.0	0.0	0.0	0.0	0.0	0.0	0.0	0.0	0.0	0.0	0.0	0.0	0.0	0.0	0.0	0.0
NDUFAF1	51103	symbol	H. sapiens	51103	H. sapiens	NDUFAF1	NADH:ubiquinone oxidoreductase complex assembly factor 1	NDUFAF1 is a gene that encodes a protein involved in the assembly of complex I, which is responsible for the transfer of electrons from NADH to ubiquinone in the mitochondrial respiratory chain. This process results in the translocation of protons across the inner mitochondrial membrane. Mutations in NDUFAF1 have been linked to mitochondrial complex I deficiency. The gene has alternative spliced …	Mutations in NDUFAF1 have been linked to mitochondrial complex I deficiency, which is a rare genetic disorder that affects the function of the mitochondria. This can lead to a wide range of symptoms, including developmental delays, muscle weakness, seizures, and vision problems. There is currently no cure for mitochondrial complex I deficiency, and treatment is focused on managing symptoms and im…	GO:0051131 chaperone-mediated protein complex assembly;GO:0006120 mitochondrial electron transport, NADH to ubiquinone;GO:0010257 NADH dehydrogenase complex assembly		Disease related genes; Predicted intracellular proteins; Human disease related genes:Congenital disorders of metabolism:Mitochondrial diseases	Cytosol;Mitochondria (Approved)				0.0	0.0	0.0	0.0	0.0	0.0	0.0	0.0	0.0	0.0	0.0	0.0	0.0	0.0	0.0	0.0	0.0	0.0	0.0	0.0
STT3A	3703	symbol	H. sapiens	3703	H. sapiens	STT3A	STT3 oligosaccharyltransferase complex catalytic subunit A	STT3A is a gene that encodes a catalytic subunit of the N-oligosaccharyltransferase (OST) complex. This complex is responsible for transferring glycan chains to asparagine residues of target proteins in the endoplasmic reticulum. There is another complex that contains a similar catalytic subunit with an overlapping function. Multiple transcript variants encoding different isoforms have been found…	Mutations in the STT3A gene have been associated with a variety of diseases, including congenital disorders of glycosylation (CDG), which are a group of rare genetic disorders characterized by abnormal glycosylation of proteins. CDG can affect multiple organ systems and present with a wide range of symptoms, including developmental delay, intellectual disability, seizures, and abnormal bleeding. …	GO:0043686 co-translational protein modification;GO:0018279 protein N-linked glycosylation via asparagine;GO:0006487 protein N-linked glycosylation		Transporters; ENZYME proteins:Transferases; Potential drug targets; Disease related genes; Enzymes; Human disease related genes:Congenital disorders of metabolism:Congenital disorders of glycan/glycoprotein metabolism; Cancer-related genes:Candidate cancer biomarkers					0.0	0.0	0.0	0.0	0.0	0.0	0.0	0.0	0.0	0.0	0.0	0.0	0.0	0.0	0.0	0.0	0.0	0.0	0.0	0.0
GGCT	79017	symbol	H. sapiens	79017	H. sapiens	GGCT	gamma-glutamylcyclotransferase	The GGCT gene encodes a protein that is involved in the breakdown of glutathione, a molecule that plays a critical role in protecting cells from oxidative stress. Specifically, the protein catalyzes the formation of 5-oxoproline from gamma-glutamyl dipeptides, which is the second-to-last step in glutathione catabolism. The protein may also be involved in cell proliferation and has been identified…	There is limited information available on the disease implications of the GGCT gene. However, studies have suggested that the protein encoded by this gene may play a role in cancer development and progression. Specifically, GGCT has been identified as a potential marker for several types of cancer, including breast, lung, and ovarian cancer. Targeted drug discovery efforts for GGCT are currently …	GO:0001836 release of cytochrome c from mitochondria;GO:0008637 apoptotic mitochondrial changes;GO:0097190 apoptotic signaling pathway		ENZYME proteins:Lyases; Enzymes; Predicted intracellular proteins					0.0	0.0	0.0	0.0	0.0	0.0	0.0	0.0	0.0	0.0	0.0	0.0	0.0	0.0	0.0	0.0	0.0	0.0	0.0	0.0
HS2ST1	9653	symbol	H. sapiens	9653	H. sapiens	HS2ST1	heparan sulfate 2-O-sulfotransferase 1	HS2ST1 is a gene that encodes for an enzyme involved in the biosynthesis of heparan sulfate, a molecule that plays a crucial role in various biological activities. The enzyme transfers sulfate to the 2 position of the iduronic acid residue of heparan sulfate, generating distinct fine structures. Knockout embryonic mice lacking this gene showed no kidney formation, indicating that the absence of t…	Research has shown that alterations in HS2ST1 expression or activity can lead to various diseases, including cancer, cardiovascular diseases, and neurological disorders. For example, decreased expression of HS2ST1 has been observed in breast cancer, and its overexpression has been linked to the progression of prostate cancer. Additionally, mutations in HS2ST1 have been associated with a rare gene…	GO:0060676 ureteric bud formation;GO:0015014 heparan sulfate proteoglycan biosynthetic process, polysaccharide chain biosynthetic process;GO:0072172 mesonephric tubule formation		Disease related genes; Predicted intracellular proteins	Mitochondria (Approved)			(M5937)HALLMARK GLYCOLYSIS	0.0	0.0	0.0	0.0	0.0	0.0	0.0	0.0	0.0	0.0	0.0	0.0	0.0	0.0	1.0	0.0	0.0	0.0	0.0	0.0
C17orf79	55352	gene_synonym	H. sapiens	55352	H. sapiens	COPRS	coordinator of PRMT5 and differentiation stimulator	COPRS is a human gene that plays a role in histone binding and histone H4-R3 methylation. It is located in the cytosol, nucleoplasm, and plasma membrane. COPRS is a coordinator of PRMT5 and a differentiation stimulator.	There is limited information available on the disease implications of COPRS. However, recent studies have suggested that COPRS may play a role in cancer development and progression. Specifically, it has been shown to be overexpressed in several types of cancer, including breast, lung, and liver cancer. Targeted drug discovery efforts for COPRS are still in the early stages, but there is potential…	GO:0007517 muscle organ development;GO:0061061 muscle structure development;GO:0006338 chromatin remodeling		Predicted intracellular proteins	Nucleoplasm (Supported); Additional: Cytosol;Plasma membrane				0.0	0.0	0.0	0.0	0.0	0.0	0.0	0.0	0.0	0.0	0.0	0.0	0.0	0.0	0.0	0.0	0.0	0.0	0.0	0.0
FADS3	3995	symbol	H. sapiens	3995	H. sapiens	FADS3	fatty acid desaturase 3	Fatty acid desaturase 3 (FADS3) is a member of the fatty acid desaturase (FADS) gene family, which regulates the unsaturation of fatty acids by introducing double bonds between defined carbons of the fatty acyl chain. FADS family members are fusion products composed of an N-terminal cytochrome b5-like domain and a C-terminal multiple membrane-spanning desaturase portion, both of which are charact…	There is limited information available on the disease implications of FADS3. However, studies have suggested that genetic variations in the FADS gene cluster, including FADS3, may be associated with various diseases such as cardiovascular disease, type 2 diabetes, and inflammatory disorders. Targeted drug discovery efforts for FADS3 are also limited, but some studies have explored the potential o…	GO:0006636 unsaturated fatty acid biosynthetic process;GO:0033559 unsaturated fatty acid metabolic process;GO:0006633 fatty acid biosynthetic process		Predicted intracellular proteins	Nucleoli fibrillar center (Approved)				0.0	0.0	0.0	0.0	0.0	0.0	0.0	0.0	0.0	0.0	0.0	0.0	0.0	0.0	0.0	0.0	0.0	0.0	0.0	0.0
EFHC2	80258	symbol	H. sapiens	80258	H. sapiens	EFHC2	EF-hand domain containing 2	EFHC2 is a gene that encodes a protein containing three DM10 domains and three calcium-binding EF-hand motifs. It has been suggested that this gene, along with a related protein encoded by a gene on chromosome 6, may be involved in the development of epilepsy. Additionally, EFHC2 may be associated with fear recognition in individuals with Turner syndrome.	EFHC2 has been implicated in the development of epilepsy, a neurological disorder characterized by recurrent seizures. Studies have shown that mutations in the EFHC2 gene may lead to altered calcium signaling in neurons, which can contribute to the development of epilepsy. Targeted drug discovery efforts for EFHC2 have focused on identifying compounds that can modulate calcium signaling in neuron…	GO:1990830 cellular response to leukemia inhibitory factor;GO:1990823 response to leukemia inhibitory factor;GO:0030317 flagellated sperm motility		Predicted intracellular proteins					0.0	0.0	1.0	0.0	0.0	0.0	0.0	0.0	0.0	0.0	0.0	0.0	0.0	0.0	0.0	0.0	0.0	0.0	0.0	0.0
A_32_P211621						None	None	None	None	None	None	None	None	None	None	None	nan	nan	nan	nan	nan	nan	nan	nan	nan	nan	nan	nan	nan	nan	nan	nan	nan	nan	nan	nan
A_32_P871061						None	None	None	None	None	None	None	None	None	None	None	nan	nan	nan	nan	nan	nan	nan	nan	nan	nan	nan	nan	nan	nan	nan	nan	nan	nan	nan	nan
MTX1	4580	symbol	H. sapiens	4580	H. sapiens	MTX1	metaxin 1	MTX1, also known as metaxin 1, is a gene that is predicted to play a role in the organization of mitochondria. It is part of two protein complexes, the MIB complex and the SAM complex. The MIB complex is involved in the biogenesis of mitochondrial inner membrane proteins, while the SAM complex is involved in the assembly of outer membrane proteins. The exact function of MTX1 within these complexe…	Mutations in MTX1 have been associated with various mitochondrial disorders, including Leigh syndrome, a severe neurological disorder, and mitochondrial encephalomyopathy, lactic acidosis, and stroke-like episodes (MELAS), a multisystem disorder that affects the brain and other organs. These disorders are caused by defects in mitochondrial function, which can lead to a wide range of symptoms, inc…	GO:0007008 outer mitochondrial membrane organization;GO:0045040 protein insertion into mitochondrial outer membrane;GO:0090151 establishment of protein localization to mitochondrial membrane			Mitochondria (Approved)				0.0	0.0	0.0	0.0	0.0	1.0	0.0	0.0	1.0	0.0	0.0	0.0	0.0	0.0	0.0	0.0	0.0	0.0	0.0	0.0
PGM2L1	283209	symbol	H. sapiens	283209	H. sapiens	PGM2L1	phosphoglucomutase 2 like 1	PGM2L1, or phosphoglucomutase 2 like 1, is a gene that is predicted to be involved in glucose metabolic processes and phosphorylation. It enables glucose-1,6-bisphosphate synthase activity and is predicted to be located in the cytosol. This information is provided by the Alliance of Genome Resources as of April 2022.	There is limited information available on the disease implications of PGM2L1. However, some studies have suggested that mutations in this gene may be associated with metabolic disorders such as type 2 diabetes and obesity. Targeted drug discovery efforts for PGM2L1 are currently underway, with researchers exploring the potential of small molecule inhibitors to modulate its activity. While there a…	GO:0006006 glucose metabolic process;GO:0019318 hexose metabolic process;GO:0005996 monosaccharide metabolic process		Enzymes; Predicted intracellular proteins; ENZYME proteins:Transferases	Mitochondria (Approved)				0.0	0.0	0.0	0.0	0.0	0.0	0.0	0.0	0.0	0.0	0.0	0.0	0.0	0.0	1.0	0.0	0.0	0.0	0.0	0.0
SPAG9	9043	symbol	H. sapiens	9043	H. sapiens	SPAG9	sperm associated antigen 9	SPAG9 is a gene that belongs to the cancer testis antigen gene family. The protein encoded by this gene acts as a scaffold protein that organizes mitogen-activated protein kinases and mediates c-Jun-terminal kinase signaling. Additionally, it binds to kinesin-1 and may be involved in microtubule-based membrane transport. SPAG9 may play a role in tumor growth and development. The gene undergoes al…	SPAG9 has been implicated in various types of cancer, including breast, lung, ovarian, and cervical cancer. It is overexpressed in cancer cells and has been shown to promote tumor growth and metastasis. Therefore, SPAG9 has been identified as a potential therapeutic target for cancer treatment. Several studies have focused on developing drugs that target SPAG9, including small molecule inhibitors…	GO:1903860 negative regulation of dendrite extension;GO:1903859 regulation of dendrite extension;GO:0032418 lysosome localization		Predicted intracellular proteins	Centriolar satellite;Cytosol (Enhanced)		(M67)PID ARF6 TRAFFICKING PATHWAY		0.0	0.0	0.0	0.0	0.0	0.0	0.0	0.0	0.0	0.0	0.0	0.0	0.0	0.0	0.0	0.0	0.0	0.0	0.0	0.0
DBNDD1	79007	symbol	H. sapiens	79007	H. sapiens	DBNDD1	dysbindin domain containing 1	DBNDD1, also known as dysbindin domain containing 1, is a gene that is predicted to be involved in the negative regulation of protein kinase activity. It is also predicted to be located in the cytoplasm. The function of this gene is not yet fully understood, but it has been linked to various neurological disorders such as schizophrenia and bipolar disorder. Further research is needed to fully und…	DBNDD1 has been implicated in various neurological disorders, including schizophrenia and bipolar disorder. Studies have shown that mutations in this gene may contribute to the development of these conditions. As a result, DBNDD1 has become a potential target for drug discovery efforts aimed at treating these disorders. However, there are currently no drugs on the market that specifically target …	GO:0009966 regulation of signal transduction;GO:0023051 regulation of signaling;GO:0010646 regulation of cell communication		Predicted intracellular proteins	Nuclear speckles (Approved); Additional: Cytosol;End piece;Equatorial segment;Mid piece;Principal piece				0.0	0.0	0.0	0.0	0.0	0.0	0.0	0.0	0.0	0.0	0.0	0.0	0.0	0.0	0.0	0.0	0.0	0.0	0.0	0.0
NTS	4922	symbol	H. sapiens	4922	H. sapiens	NTS	neurotensin	The human gene NTS encodes a precursor for two peptides, neuromedin N and neurotensin. Neurotensin is a tridecapeptide that is widely distributed throughout the central nervous system and may function as a neurotransmitter or neuromodulator. It may be involved in dopamine-associated pathophysiological events, gut structure and function, and fat metabolism regulation. Neurotensin also exhibits ant…	There is evidence to suggest that dysregulation of the NTS gene may be involved in the pathogenesis of several diseases, including schizophrenia, Parkinson's disease, and colorectal cancer. As a result, there has been significant interest in developing drugs that target the neurotensin system. One example is the drug levocabastine, which is used to treat allergic rhinitis and works by blocking th…	GO:0007218 neuropeptide signaling pathway;GO:0031640 killing of cells of another organism;GO:0141061 disruption of cell in another organism		Predicted secreted proteins	Vesicles (Supported)		(M167)PID AP1 PATHWAY		0.0	0.0	0.0	0.0	0.0	0.0	0.0	0.0	0.0	0.0	1.0	0.0	0.0	0.0	0.0	0.0	0.0	0.0	0.0	0.0
IL12RB2	3595	symbol	H. sapiens	3595	H. sapiens	IL12RB2	interleukin 12 receptor subunit beta 2	IL12RB2 is a gene that encodes a type I transmembrane protein that is a subunit of the interleukin 12 receptor complex. When coexpressed with IL12RB1, it forms high-affinity IL12 binding sites and reconstitutes IL12 dependent signaling. The gene is up-regulated by interferon gamma in Th1 cells and plays a role in Th1 cell differentiation. The up-regulation of this gene is associated with several …	IL12RB2 has been implicated in several diseases, including autoimmune disorders, infectious diseases, and cancer. In autoimmune disorders such as Crohn's disease and psoriasis, IL12RB2 is upregulated and contributes to the inflammatory response. Targeting IL12RB2 has been explored as a potential therapeutic strategy for these diseases. In infectious diseases such as leprosy and tuberculosis, IL12…	GO:0035722 interleukin-12-mediated signaling pathway;GO:0071349 cellular response to interleukin-12;GO:0070671 response to interleukin-12		Human disease related genes:Immune system diseases:Allergies and autoimmune diseases; Human disease related genes:Skin diseases:Skin and soft tissue diseases; Predicted intracellular proteins	Plasma membrane (Approved)		(M36)PID IL27 PATHWAY; (M54)PID IL12 2PATHWAY	(M5951)HALLMARK SPERMATOGENESIS	0.0	0.0	0.0	0.0	0.0	0.0	0.0	0.0	0.0	0.0	0.0	0.0	0.0	0.0	0.0	0.0	0.0	0.0	0.0	0.0
DNAJB9	4189	symbol	H. sapiens	4189	H. sapiens	DNAJB9	DnaJ heat shock protein family (Hsp40) member B9	DNAJB9 is a member of the J protein family and belongs to the type 2 subgroup of DnaJ proteins. It is localized to the endoplasmic reticulum and plays a role in regulating the ATPase activity of 70 kDa heat shock proteins. The gene is induced by endoplasmic reticulum stress and helps protect stressed cells from apoptosis.	Research on DNAJB9 and its disease implications is still in its early stages. However, recent studies have suggested that DNAJB9 may play a role in the development of certain types of cancer, including breast cancer and lung cancer. In addition, mutations in the DNAJB9 gene have been linked to the development of Charcot-Marie-Tooth disease, a neurological disorder that affects the peripheral nerv…	GO:1903895 negative regulation of IRE1-mediated unfolded protein response;GO:1903894 regulation of IRE1-mediated unfolded protein response;GO:1900102 negative regulation of endoplasmic reticulum unfolded protein response		Predicted intracellular proteins	Cytosol;Endoplasmic reticulum (Approved)			(M5908)HALLMARK ANDROGEN RESPONSE; (M5922)HALLMARK UNFOLDED PROTEIN RESPONSE; (M5905)HALLMARK ADIPOGENESIS	0.0	0.0	0.0	0.0	1.0	0.0	0.0	0.0	0.0	0.0	0.0	0.0	0.0	0.0	0.0	0.0	0.0	0.0	0.0	0.0
MUM1L1	139221	gene_synonym	H. sapiens	139221	H. sapiens	PWWP3B	PWWP domain containing 3B	The human gene PWWP3B encodes a protein that contains a mutated melanoma-associated antigen 1 domain. This protein is expressed at high levels on certain types of cancers. Multiple variants of the gene have been identified, but they all encode the same protein.	There is limited information available on the disease implications of PWWP3B. However, its high expression in certain types of cancers suggests that it may play a role in tumorigenesis. Targeted drug discovery efforts for PWWP3B are also limited, as the function of the protein it encodes is not well understood. However, there have been some studies exploring the potential of PWWP3B as a therapeut…			Predicted intracellular proteins					0.0	0.0	0.0	0.0	0.0	0.0	0.0	0.0	0.0	0.0	0.0	0.0	0.0	0.0	0.0	0.0	0.0	0.0	0.0	0.0
A_24_P548966						None	None	None	None	None	None	None	None	None	None	None	nan	nan	nan	nan	nan	nan	nan	nan	nan	nan	nan	nan	nan	nan	nan	nan	nan	nan	nan	nan
MRFAP1L1	114932	symbol	H. sapiens	114932	H. sapiens	MRFAP1L1	Morf4 family associated protein 1 like 1	MRFAP1L1, also known as Morf4 family associated protein 1 like 1, is a human gene that encodes a protein with identical protein binding activity. This gene is involved in various biological processes, including DNA repair, chromatin remodeling, and transcriptional regulation. The exact function of MRFAP1L1 is not fully understood, but it is believed to play a role in maintaining genomic stability…	There is limited information available on the disease implications of MRFAP1L1. However, some studies have suggested that mutations in this gene may be associated with the development of certain types of cancer, including breast cancer and lung cancer. Targeted drug discovery efforts for MRFAP1L1 are currently limited, as the exact function of the protein encoded by this gene is not fully underst…			Predicted intracellular proteins					0.0	0.0	0.0	0.0	0.0	0.0	0.0	0.0	0.0	0.0	0.0	0.0	0.0	0.0	0.0	0.0	0.0	0.0	0.0	0.0
LDHD	197257	symbol	H. sapiens	197257	H. sapiens	LDHD	lactate dehydrogenase D	LDHD is a gene that encodes a protein belonging to the D-isomer specific 2-hydroxyacid dehydrogenase family. The protein has both D-lactate and D-glycerate dehydrogenase activities, similar to the protein found in yeast. Alternative splicing occurs at this gene, resulting in two transcript variants that encode distinct isoforms.	There is limited information available on the disease implications of LDHD. However, recent studies have suggested that mutations in this gene may be associated with an increased risk of developing certain types of cancer, including breast and ovarian cancer. Targeted drug discovery efforts for LDHD are also limited, as the function of this gene is not well understood. However, some studies have …	GO:1903457 lactate catabolic process;GO:0006089 lactate metabolic process;GO:1901616 organic hydroxy compound catabolic process		Predicted intracellular proteins; ENZYME proteins:Oxidoreductases; Human disease related genes:Musculoskeletal diseases:Other musculoskeletal diseases; Potential drug targets; Disease related genes; Enzymes	Cytosol (Approved)				0.0	0.0	0.0	0.0	0.0	0.0	0.0	0.0	0.0	0.0	0.0	0.0	0.0	0.0	1.0	0.0	0.0	0.0	0.0	0.0
A_24_P833211						None	None	None	None	None	None	None	None	None	None	None	nan	nan	nan	nan	nan	nan	nan	nan	nan	nan	nan	nan	nan	nan	nan	nan	nan	nan	nan	nan
MORN5	254956	symbol	H. sapiens	254956	H. sapiens	MORN5	MORN repeat containing 5	MORN5 (MORN repeat containing 5) is a gene that encodes a protein containing multiple MORN (membrane occupation and recognition nexus) repeats. MORN5 is expressed in various tissues, including the brain, heart, and liver. The function of MORN5 is not well understood, but it has been suggested to play a role in cell division and cytokinesis. Mutations in MORN5 have been associated with intellectua…	There is limited information available on the disease implications and targeted drug discovery efforts for MORN5. However, mutations in MORN5 have been associated with intellectual disability and developmental delay, suggesting that targeting this gene may have therapeutic potential for these conditions. Currently, there are no drugs on the market that specifically target MORN5. However, there ar…			Predicted intracellular proteins					0.0	0.0	0.0	0.0	0.0	0.0	0.0	0.0	0.0	0.0	0.0	0.0	0.0	0.0	0.0	0.0	0.0	0.0	0.0	0.0
FAP	2191	symbol	H. sapiens	2191	H. sapiens	FAP	fibroblast activation protein alpha	FAP, or fibroblast activation protein alpha, is a protein that belongs to the serine protease family and is found in reactive stromal fibroblasts of epithelial cancers, granulation tissue of healing wounds, and malignant cells of bone and soft tissue sarcomas. It is believed to play a role in controlling fibroblast growth and epithelial-mesenchymal interactions during tissue repair, development, …	FAP has been identified as a potential therapeutic target for cancer treatment due to its overexpression in tumor-associated fibroblasts. Several studies have shown that inhibition of FAP can lead to reduced tumor growth and metastasis in preclinical models. As a result, there has been significant interest in developing FAP-targeted drugs for cancer therapy. One such drug is Talabostat, which is …	GO:1902362 melanocyte apoptotic process;GO:0010710 regulation of collagen catabolic process;GO:0060244 negative regulation of cell proliferation involved in contact inhibition		Predicted intracellular proteins; Predicted secreted proteins; Peptidases:Serine-type peptidases; ENZYME proteins:Hydrolases; Enzymes; Cancer-related genes:Candidate cancer biomarkers		Sibrotuzumab		(M5930)HALLMARK EPITHELIAL MESENCHYMAL TRANSITION	0.0	0.0	0.0	0.0	0.0	0.0	0.0	0.0	0.0	0.0	0.0	0.0	0.0	0.0	0.0	0.0	0.0	0.0	1.0	0.0
PLD3	23646	symbol	H. sapiens	23646	H. sapiens	PLD3	phospholipase D family member 3	PLD3 is a gene that encodes an enzyme belonging to the phospholipase D family. This enzyme is responsible for breaking down membrane phospholipids. The protein encoded by PLD3 is a type II membrane protein that contains two PLD phosphodiesterase domains. It plays a role in the processing of amyloid-beta precursor protein and mutations in this gene have been linked to an increased risk of Alzheime…	PLD3 has been identified as a potential therapeutic target for Alzheimer's disease due to its involvement in the processing of amyloid-beta precursor protein. Several studies have shown that PLD3 expression is increased in the brains of Alzheimer's patients, and that genetic variants in the PLD3 gene are associated with an increased risk of developing the disease. Targeted drug discovery efforts …	GO:0014902 myotube differentiation;GO:1900015 regulation of cytokine production involved in inflammatory response;GO:0051146 striated muscle cell differentiation		Predicted intracellular proteins; Human disease related genes:Nervous system diseases:Neurodegenerative diseases; Potential drug targets; Disease related genes; ENZYME proteins:Hydrolases; Enzymes	Cytosol;Endoplasmic reticulum (Approved); Additional: Nucleoplasm				0.0	0.0	0.0	0.0	0.0	0.0	0.0	0.0	0.0	0.0	0.0	0.0	0.0	0.0	0.0	1.0	0.0	0.0	0.0	0.0
PIGK	10026	symbol	H. sapiens	10026	H. sapiens	PIGK	phosphatidylinositol glycan anchor biosynthesis class K	The human gene PIGK is involved in the biosynthesis of glycosylphosphatidylinositol (GPI)-anchor, a glycolipid found on many blood cells that anchors proteins to the cell surface. PIGK is a member of the cysteine protease family C13 and is thought to be the enzymatic component of the multisubunit enzyme GPI transamidase. GPI transamidase mediates GPI anchoring in the endoplasmic reticulum by tran…	Mutations in the PIGK gene have been associated with a rare genetic disorder called hyperphosphatasia with mental retardation syndrome (HPMRS), which is characterized by elevated levels of alkaline phosphatase in the blood and developmental delay. Targeted drug discovery efforts for HPMRS have been limited due to the rarity of the disease. However, research on GPI-anchor biosynthesis and the role…	GO:0016255 attachment of GPI anchor to protein;GO:0006505 GPI anchor metabolic process;GO:0006506 GPI anchor biosynthetic process		Human disease related genes:Congenital disorders of metabolism:Congenital disorders of lipid/glycolipid metabolism; Predicted intracellular proteins; Peptidases:Cysteine-type peptidases; Potential drug targets; Disease related genes; Enzymes					0.0	0.0	0.0	0.0	0.0	0.0	0.0	0.0	0.0	0.0	0.0	0.0	0.0	0.0	0.0	0.0	0.0	0.0	0.0	0.0
ZNF507	22847	symbol	H. sapiens	22847	H. sapiens	ZNF507	zinc finger protein 507	ZNF507 is a human gene that encodes for a protein called zinc finger protein 507. This protein is predicted to have the ability to bind to DNA and metal ions, and is involved in the positive regulation of transcription by RNA polymerase II. It is also predicted to be active in the nucleus. Zinc finger proteins are known to play important roles in gene regulation and are involved in a variety of c…	There is currently limited information available on the disease implications of ZNF507. However, some studies have suggested that mutations in this gene may be associated with certain types of cancer, including breast cancer and hepatocellular carcinoma. Targeted drug discovery efforts for ZNF507 are also limited, as the function of this gene is not yet fully understood. There are currently no dr…	GO:0045944 positive regulation of transcription by RNA polymerase II;GO:0045893 positive regulation of DNA-templated transcription;GO:1902680 positive regulation of RNA biosynthetic process		Transcription factors:Zinc-coordinating DNA-binding domains; Predicted intracellular proteins	Nucleoli (Approved); Additional: Cytosol				0.0	0.0	0.0	0.0	0.0	0.0	0.0	0.0	0.0	0.0	0.0	0.0	0.0	0.0	0.0	0.0	0.0	0.0	0.0	0.0
MALSU1	115416	symbol	H. sapiens	115416	H. sapiens	MALSU1	mitochondrial assembly of ribosomal large subunit 1	MALSU1 is a human gene that is predicted to have ribosomal large subunit binding activity. It is involved in negative regulation of mitochondrial translation and ribosomal large subunit biogenesis. MALSU1 is located in both the cytosol and mitochondrion and colocalizes with the mitochondrial large ribosomal subunit.	There is limited information available on the disease implications of MALSU1. However, recent studies have suggested that mutations in MALSU1 may be associated with mitochondrial disorders, such as Leigh syndrome and mitochondrial encephalomyopathy. Targeted drug discovery efforts for MALSU1 are currently underway, with a focus on identifying small molecules that can modulate its activity and pot…	GO:0070130 negative regulation of mitochondrial translation;GO:0090071 negative regulation of ribosome biogenesis;GO:0090069 regulation of ribosome biogenesis		Predicted intracellular proteins	Mitochondria (Enhanced)				0.0	0.0	0.0	0.0	0.0	0.0	0.0	0.0	0.0	0.0	0.0	0.0	0.0	0.0	0.0	0.0	0.0	0.0	0.0	0.0
BRF2	55290	symbol	H. sapiens	55290	H. sapiens	BRF2	BRF2 general transcription factor IIIB subunit	BRF2 is a gene that encodes a subunit of the RNA polymerase III transcription factor complex. This complex is necessary for the transcription of genes that have promoter elements upstream of the initiation site. The product of this gene is a TFIIB-like factor that is recruited to the TATA-box of polymerase III small nuclear RNA gene promoters through its interaction with the TATA-binding protein.…	There is limited information available on the disease implications of BRF2 mutations. However, recent studies have suggested that BRF2 may play a role in cancer development and progression. Specifically, BRF2 has been found to be overexpressed in several types of cancer, including breast, lung, and liver cancer. Targeted drug discovery efforts for BRF2 are still in the early stages, but there is …	GO:0006359 regulation of transcription by RNA polymerase III;GO:0070897 transcription preinitiation complex assembly;GO:0006352 DNA-templated transcription initiation		Predicted intracellular proteins	Nucleoli (Supported)			(M5898)HALLMARK DNA REPAIR	0.0	0.0	0.0	0.0	0.0	0.0	0.0	0.0	0.0	0.0	0.0	0.0	0.0	0.0	0.0	0.0	0.0	0.0	0.0	0.0
RNF14	9604	symbol	H. sapiens	9604	H. sapiens	RNF14	ring finger protein 14	RNF14, or ring finger protein 14, is a gene that encodes a protein containing a RING zinc finger, which is involved in protein-protein interactions. The protein interacts with androgen receptor (AR) and may act as a coactivator that induces AR target gene expression in the prostate. A dominant negative mutant of this gene has been shown to inhibit the AR-mediated growth of prostate cancer. The pr…	Research on RNF14 has primarily focused on its role in prostate cancer. Studies have shown that RNF14 is overexpressed in prostate cancer cells and plays a critical role in the growth and survival of these cells. Targeting RNF14 has emerged as a potential therapeutic strategy for prostate cancer. However, there are currently no drugs on the market that specifically target RNF14. Several studies h…	GO:0160127 protein-RNA covalent cross-linking repair;GO:0085020 protein K6-linked ubiquitination;GO:0030521 androgen receptor signaling pathway		Enzymes; Predicted intracellular proteins; ENZYME proteins:Transferases	Nucleoplasm (Supported); Additional: Cytosol				0.0	0.0	0.0	0.0	0.0	0.0	0.0	1.0	0.0	0.0	0.0	0.0	0.0	0.0	0.0	0.0	0.0	0.0	0.0	0.0
NIF3L1	60491	symbol	H. sapiens	60491	H. sapiens	NIF3L1	NGG1 interacting factor 3 like 1	NIF3L1, also known as NGG1 interacting factor 3 like 1, is a human gene that encodes a protein involved in positive regulation of transcription, DNA-templated. It enables identical protein binding activity and is located in the cytoplasm. The gene's function and location suggest that it may play a role in regulating gene expression. This information is provided by the Alliance of Genome Resources…	There is limited information available on the disease implications of NIF3L1. However, some studies have suggested that it may be involved in the development and progression of certain cancers, including breast cancer and hepatocellular carcinoma. Targeted drug discovery efforts for NIF3L1 are also limited, as the gene's function and role in disease are not well understood. Currently, there are n…	GO:0000122 negative regulation of transcription by RNA polymerase II;GO:0030182 neuron differentiation;GO:0048699 generation of neurons		Predicted intracellular proteins	Vesicles (Approved)				0.0	0.0	0.0	0.0	0.0	0.0	0.0	0.0	0.0	0.0	0.0	0.0	0.0	0.0	0.0	0.0	0.0	0.0	0.0	0.0
NPEPPS	9520	symbol	H. sapiens	9520	H. sapiens	NPEPPS	aminopeptidase puromycin sensitive	NPEPPS is a gene that encodes for the puromycin-sensitive aminopeptidase, a type of zinc metallopeptidase that breaks down amino acids from the N-terminus of its substrate. This enzyme is found in both the cytoplasm and cellular membranes and is responsible for degrading enkaphalins in the brain. Studies in mice suggest that NPEPPS is involved in proteolytic events that regulate the cell cycle.	There is limited information on the disease implications of NPEPPS mutations. However, studies have shown that altered expression of NPEPPS may be associated with certain types of cancer, including breast and lung cancer. Targeted drug discovery efforts for NPEPPS have been limited, but some studies have explored the potential of NPEPPS inhibitors as a therapeutic strategy for cancer treatment. O…	GO:0043171 peptide catabolic process;GO:1903955 positive regulation of protein targeting to mitochondrion;GO:1903749 positive regulation of establishment of protein localization to mitochondrion		Peptidases:Metallopeptidases; ENZYME proteins:Hydrolases; Enzymes; Predicted intracellular proteins	Cytosol (Supported)	Artenimol; Tosedostat			0.0	0.0	0.0	0.0	0.0	0.0	1.0	0.0	0.0	0.0	0.0	0.0	0.0	0.0	0.0	0.0	0.0	0.0	0.0	0.0
PPP2R2A	5520	symbol	H. sapiens	5520	H. sapiens	PPP2R2A	protein phosphatase 2 regulatory subunit Balpha	PPP2R2A is a gene that encodes for the alpha isoform of the regulatory subunit B55 subfamily of protein phosphatase 2 (PP2A). PP2A is a major Ser/Thr phosphatase that is involved in the negative control of cell growth and division. The enzyme consists of a heteromeric core composed of a catalytic subunit and a constant regulatory subunit, which associates with various regulatory subunits. The B r…	PPP2R2A has been implicated in various diseases, including cancer, neurodegenerative disorders, and cardiovascular diseases. In cancer, PPP2R2A has been shown to act as a tumor suppressor by regulating cell cycle progression and apoptosis. Loss of PPP2R2A expression or function has been observed in several types of cancer, including breast, prostate, and liver cancer. Therefore, PPP2R2A is a pote…	GO:0043278 response to morphine;GO:0014072 response to isoquinoline alkaloid;GO:0006470 protein dephosphorylation		Predicted intracellular proteins	Cytosol (Approved)	2,6,8-Trimethyl-3-Amino-9-Benzyl-9-Methoxynonanoic Acid	(M286)PID TGFBR PATHWAY; (M164)PID ERBB1 DOWNSTREAM PATHWAY		0.0	0.0	0.0	0.0	0.0	0.0	0.0	1.0	0.0	0.0	0.0	0.0	1.0	0.0	0.0	0.0	0.0	0.0	0.0	0.0
KLHDC2	23588	symbol	H. sapiens	23588	H. sapiens	KLHDC2	kelch domain containing 2	KLHDC2 is a human gene that encodes for a protein called kelch domain containing 2. This protein is involved in the process of breaking down proteins through the C-end degron rule pathway, which is a type of ubiquitin-dependent protein catabolic process. KLHDC2 is located in the nuclear body and nuclear membrane and is active in the Cul2-RING ubiquitin ligase complex and nucleus. It enables ubiqu…	There is limited information available on the disease implications of KLHDC2. However, some studies have suggested that mutations in this gene may be associated with certain types of cancer, including breast cancer and lung cancer. Targeted drug discovery efforts for KLHDC2 are also limited, as the function of this gene is not well understood. However, some researchers are exploring the potential…	GO:0140627 ubiquitin-dependent protein catabolic process via the C-end degron rule pathway;GO:0043161 proteasome-mediated ubiquitin-dependent protein catabolic process;GO:0010498 proteasomal protein catabolic process		Predicted intracellular proteins	Nuclear membrane;Nucleoplasm (Supported); Additional: Nuclear bodies				0.0	0.0	0.0	0.0	0.0	0.0	0.0	0.0	0.0	0.0	0.0	0.0	0.0	0.0	0.0	0.0	0.0	0.0	0.0	0.0
CSE1L	1434	symbol	H. sapiens	1434	H. sapiens	CSE1L	chromosome segregation 1 like	CSE1L is a human gene that encodes a protein involved in the transport of other proteins into the nucleus. Specifically, it binds to importin-alpha, a protein that carries a nuclear localization signal (NLS), and helps transport it through the nuclear pore complex. Once inside the nucleus, the NLS protein is released and the CSE1L protein must be returned to the cytoplasm. CSE1L may also play a r…	Mutations in the CSE1L gene have been associated with several types of cancer, including breast, lung, and ovarian cancer. In addition, overexpression of CSE1L has been observed in various cancers and is associated with poor prognosis. Therefore, CSE1L has been identified as a potential therapeutic target for cancer treatment. Several studies have investigated the use of small molecule inhibitors…	GO:0006611 protein export from nucleus;GO:0006606 protein import into nucleus;GO:0051170 import into nucleus		Transporters:Transporter channels and pores; Predicted intracellular proteins; Cancer-related genes:Candidate cancer biomarkers	Nucleoplasm (Enhanced); Additional: Cytosol		(M261)PID P53 REGULATION PATHWAY; (M145)PID P53 DOWNSTREAM PATHWAY	(M5925)HALLMARK E2F TARGETS	0.0	0.0	0.0	0.0	0.0	0.0	0.0	0.0	0.0	0.0	0.0	0.0	0.0	0.0	0.0	0.0	0.0	0.0	0.0	0.0
ELAVL4	1996	symbol	H. sapiens	1996	H. sapiens	ELAVL4	ELAV like RNA binding protein 4	ELAVL4, also known as ELAV like RNA binding protein 4, is a human gene that encodes a protein involved in RNA processing and stabilization. The protein has the ability to bind to the AU-rich region of mRNA 3'-UTR, as well as to poly(A) and pre-mRNA intronic pyrimidine-rich regions. ELAVL4 is predicted to be located in the axon, cytoplasm, and dendrite, and to be part of the polysomal ribosome. It…	ELAVL4 has been implicated in several diseases, including neurodegenerative disorders such as Alzheimer's disease and amyotrophic lateral sclerosis (ALS). In Alzheimer's disease, ELAVL4 has been shown to be involved in the regulation of amyloid precursor protein (APP) mRNA stability, which is a key factor in the formation of amyloid plaques in the brain. In ALS, ELAVL4 has been found to be upregu…	GO:0140245 regulation of translation at postsynapse;GO:1905870 positive regulation of 3'-UTR-mediated mRNA stabilization;GO:1905868 regulation of 3'-UTR-mediated mRNA stabilization		Predicted intracellular proteins	Nucleoplasm;Vesicles (Approved)				0.0	1.0	1.0	0.0	0.0	0.0	0.0	0.0	0.0	0.0	0.0	0.0	0.0	1.0	0.0	0.0	0.0	0.0	0.0	0.0
C6orf108	10591	gene_synonym	H. sapiens	10591	H. sapiens	DNPH1	2'-deoxynucleoside 5'-phosphate N-hydrolase 1	DNPH1 is a gene that was discovered due to its activation by the c-Myc protein, which is involved in regulating cell growth, differentiation, and death. While the exact function of DNPH1 is not yet fully understood, studies in rats suggest that it plays a role in cellular proliferation and transformation mediated by c-Myc. Two different versions of the protein encoded by DNPH1 have been identifie…	There is limited information available on the disease implications of DNPH1. However, recent studies have suggested that the gene may be involved in the development and progression of certain types of cancer, including breast cancer and hepatocellular carcinoma. As a result, there is growing interest in developing targeted drug therapies that can inhibit the activity of DNPH1 and prevent the grow…	GO:0043174 nucleoside salvage;GO:0009159 deoxyribonucleoside monophosphate catabolic process;GO:0009125 nucleoside monophosphate catabolic process		Predicted intracellular proteins	Nucleoplasm (Approved); Additional: Cytosol				0.0	0.0	0.0	0.0	0.0	0.0	0.0	0.0	0.0	0.0	0.0	0.0	0.0	0.0	1.0	0.0	0.0	0.0	0.0	0.0
COL12A1	1303	symbol	H. sapiens	1303	H. sapiens	COL12A1	collagen type XII alpha 1 chain	COL12A1 is a gene that encodes the alpha chain of type XII collagen, which is a member of the FACIT collagen family. Type XII collagen is found in association with type I collagen and is thought to modify the interactions between collagen I fibrils and the surrounding matrix. The gene has multiple alternatively spliced transcript variants that encode different isoforms.	Mutations in the COL12A1 gene have been associated with several diseases, including Ehlers-Danlos syndrome (EDS) and myopathy. EDS is a group of inherited connective tissue disorders characterized by hypermobility of joints, skin hyperextensibility, and tissue fragility. Myopathy is a muscle disorder that can cause weakness, stiffness, and cramping. Targeted drug discovery efforts for COL12A1-rel…	GO:0035987 endodermal cell differentiation;GO:0001706 endoderm formation;GO:0030199 collagen fibril organization		Human disease related genes:Musculoskeletal diseases:Muscular diseases; Predicted intracellular proteins; Predicted secreted proteins; Human disease related genes:Congenital malformations:Congenital malformations of skin; Disease related genes	Vesicles (Approved); Additional: Cytosol		(M3005)NABA COLLAGENS; (M198)PID SYNDECAN 1 PATHWAY; (M160)PID AVB3 INTEGRIN PATHWAY	(M5930)HALLMARK EPITHELIAL MESENCHYMAL TRANSITION	0.0	0.0	0.0	0.0	0.0	0.0	0.0	0.0	0.0	0.0	0.0	0.0	0.0	0.0	0.0	0.0	0.0	1.0	0.0	0.0
A_23_P144145						None	None	None	None	None	None	None	None	None	None	None	nan	nan	nan	nan	nan	nan	nan	nan	nan	nan	nan	nan	nan	nan	nan	nan	nan	nan	nan	nan
CNTN5	53942	symbol	H. sapiens	53942	H. sapiens	CNTN5	contactin 5	CNTN5, also known as contactin 5, is a gene that encodes a protein belonging to the immunoglobulin superfamily and contactin family. This protein is a neuronal membrane protein that is anchored by glycosylphosphatidylinositol (GPI) and functions as a cell adhesion molecule. It is involved in mediating cell surface interactions during nervous system development and may play a role in the formation…	Research on CNTN5 has suggested its involvement in various neurological disorders, including autism spectrum disorder (ASD), schizophrenia, and bipolar disorder. Studies have shown that CNTN5 expression is altered in the brains of individuals with ASD and schizophrenia, and genetic variations in the CNTN5 gene have been associated with an increased risk of developing these disorders. Targeted dru…	GO:0099054 presynapse assembly;GO:0099172 presynapse organization;GO:0007416 synapse assembly		Predicted intracellular proteins					1.0	1.0	1.0	0.0	0.0	0.0	0.0	0.0	0.0	0.0	0.0	0.0	0.0	0.0	0.0	0.0	0.0	0.0	0.0	1.0
C11orf74	119710	gene_synonym	H. sapiens	119710	H. sapiens	IFTAP	intraflagellar transport associated protein	The IFTAP gene encodes a protein that interacts with non-structural protein 10 of the SARS-CoV. It may function as a negative regulator of transcription. There is a pseudogene for this gene on chromosome 1, and alternative splicing results in multiple transcript variants.	There is limited information available on the disease implications of the IFTAP gene. However, some studies have suggested that it may play a role in the pathogenesis of SARS-CoV and other viral infections. Targeted drug discovery efforts for this gene are also limited, as its function and role in disease are not well understood. Currently, there are no drugs on the market that specifically targe…	GO:0007340 acrosome reaction;GO:0007338 single fertilization;GO:0009566 fertilization		Predicted intracellular proteins	Cytosol (Approved); Additional: Aggresome				0.0	0.0	0.0	0.0	0.0	0.0	0.0	0.0	0.0	0.0	0.0	0.0	0.0	0.0	0.0	0.0	0.0	0.0	0.0	0.0
UTP11L	51118	gene_synonym	H. sapiens	51118	H. sapiens	UTP11	UTP11 small subunit processome component	UTP11 is a human gene that encodes for a small subunit processome component. It plays a role in RNA binding activity and is involved in nervous system development and the positive regulation of apoptotic process. UTP11 is located in the cytoplasm, extracellular space, and nucleolus. This information is provided by the Alliance of Genome Resources as of April 2022.	There is limited information available on the disease implications of UTP11. However, some studies have suggested that mutations in UTP11 may be associated with developmental disorders such as intellectual disability and autism spectrum disorder. Targeted drug discovery efforts for UTP11 are also limited, as the function of this gene is not well understood. However, some studies have suggested th…	GO:0042274 ribosomal small subunit biogenesis;GO:0006364 rRNA processing;GO:0016072 rRNA metabolic process		Predicted intracellular proteins	Nucleoli (Supported); Additional: Cytosol;Nucleoplasm				0.0	0.0	0.0	0.0	0.0	0.0	0.0	0.0	0.0	0.0	0.0	0.0	0.0	0.0	0.0	0.0	0.0	0.0	0.0	0.0
RABEP1	9135	symbol	H. sapiens	9135	H. sapiens	RABEP1	rabaptin, RAB GTPase binding effector protein 1	RABEP1, also known as rabaptin, RAB GTPase binding effector protein 1, is a human gene that plays a role in vesicle-mediated transport. It enables protein domain specific binding activity and protein homodimerization activity, and is located in endocytic vesicles and endosomes. RABEP1 is part of a protein-containing complex and is involved in the regulation of intracellular trafficking. This gene…	There is limited information available on the disease implications of RABEP1. However, studies have shown that mutations in this gene may be associated with certain types of cancer, including breast cancer and lung adenocarcinoma. Targeted drug discovery efforts for RABEP1 are also limited, but some studies have suggested that targeting RABEP1 may be a potential therapeutic strategy for cancer tr…	GO:1903441 protein localization to ciliary membrane;GO:0099149 regulation of postsynaptic neurotransmitter receptor internalization;GO:0006893 Golgi to plasma membrane transport		Cancer-related genes; Predicted intracellular proteins	Cytosol;Vesicles (Supported)			(M5907)HALLMARK ESTROGEN RESPONSE LATE	0.0	0.0	0.0	0.0	0.0	1.0	0.0	0.0	0.0	1.0	0.0	0.0	0.0	0.0	0.0	0.0	0.0	0.0	0.0	0.0
RIT2	6014	symbol	H. sapiens	6014	H. sapiens	RIT2	Ras like without CAAX 2	RIT2 is a human gene that belongs to the RAS superfamily of small GTPases. It is also known as Ras like without CAAX 2. The RAS superfamily of small GTPases plays a crucial role in regulating cellular processes such as cell growth, differentiation, and survival. RIT2 has been implicated in various neurological disorders, including Parkinson's disease and attention deficit hyperactivity disorder (…	Research on RIT2 has suggested its involvement in various neurological disorders, including Parkinson's disease and attention deficit hyperactivity disorder (ADHD). In Parkinson's disease, RIT2 has been found to be associated with the loss of dopaminergic neurons in the substantia nigra, a region of the brain that is critical for motor control. In ADHD, RIT2 has been linked to the regulation of d…	GO:0032489 regulation of Cdc42 protein signal transduction;GO:0032507 maintenance of protein location in cell;GO:0007265 Ras protein signal transduction		ENZYME proteins:Hydrolases; Enzymes; Predicted intracellular proteins	Nucleoplasm (Supported); Additional: Cytosol;Golgi apparatus		(M270)PID MAPK TRK PATHWAY; (M187)PID TRKR PATHWAY		0.0	0.0	1.0	1.0	0.0	0.0	0.0	1.0	0.0	0.0	0.0	0.0	0.0	0.0	0.0	0.0	0.0	0.0	0.0	1.0
PTEN	5728	symbol	H. sapiens	5728	H. sapiens	PTEN	phosphatase and tensin homolog	PTEN (phosphatase and tensin homolog) is a tumor suppressor gene that is frequently mutated in various cancers. The protein encoded by this gene is a phosphatidylinositol-3,4,5-trisphosphate 3-phosphatase, which contains a tensin-like domain and a catalytic domain similar to that of dual specificity protein tyrosine phosphatases. Unlike most protein tyrosine phosphatases, PTEN preferentially deph…	PTEN mutations have been implicated in a variety of cancers, including prostate, breast, endometrial, and glioblastoma. Loss of PTEN function leads to increased activation of the PI3K/AKT pathway, which promotes cell survival, proliferation, and migration. Therefore, PTEN is an attractive target for cancer therapy. Several drugs targeting the PI3K/AKT pathway have been developed, including PI3K i…	GO:2000808 negative regulation of synaptic vesicle clustering;GO:0051548 negative regulation of keratinocyte migration;GO:0060024 rhythmic synaptic transmission		Human disease related genes:Cancers:Cancers of haematopoietic and lymphoid tissues; Predicted intracellular proteins; Human disease related genes:Cancers:Skin cancers; Human disease related genes:Cancers:Cancers of the breast and female genital organs; Human disease related genes:Cancers:Cancers of male genital organs; Human disease related genes:Cancers:Cancers of the digestive system; Human dis…	Cytosol (Supported); Additional: Mid piece;Nucleoplasm;Principal piece	Phosphatidylethanolamine	(M12771)SA PTEN PATHWAY; (M1315)SIG PIP3 SIGNALING IN B LYMPHOCYTES; (M12)PID RHOA PATHWAY	(M5923)HALLMARK PI3K AKT MTOR SIGNALING; (M5942)HALLMARK UV RESPONSE DN; (M5915)HALLMARK APICAL JUNCTION	1.0	1.0	1.0	1.0	0.0	0.0	0.0	1.0	0.0	0.0	1.0	1.0	0.0	1.0	1.0	0.0	1.0	0.0	0.0	1.0
GSTT2	2953	symbol	H. sapiens	2953	H. sapiens	GSTT2	glutathione S-transferase theta 2 (gene/pseudogene)	The human gene GSTT2 encodes for the glutathione S-transferase (GST) theta 2 protein, which belongs to a family of proteins that help in the conjugation of reduced glutathione to various electrophilic and hydrophobic compounds. GSTs are classified into five main classes, including alpha, mu, pi, theta, and zeta, with GSTT2 belonging to the theta class. GSTT2 and GSTT2B are almost identical and sh…	There is limited information available on the disease implications of the GSTT2 gene. However, studies have suggested that genetic variations in GSTT2 may be associated with an increased risk of developing certain types of cancer, including lung, bladder, and prostate cancer. Targeted drug discovery efforts for GSTT2 have been limited, but some studies have explored the potential of using GST inh…	GO:0006749 glutathione metabolic process;GO:0006575 modified amino acid metabolic process;GO:0006790 sulfur compound metabolic process		Predicted intracellular proteins	Cytosol (Approved); Additional: Nucleoplasm	S-Hexylglutathione		(M5934)HALLMARK XENOBIOTIC METABOLISM	0.0	0.0	0.0	0.0	0.0	0.0	0.0	1.0	0.0	0.0	0.0	0.0	0.0	0.0	0.0	0.0	0.0	0.0	0.0	0.0
A_32_P109835						None	None	None	None	None	None	None	None	None	None	None	nan	nan	nan	nan	nan	nan	nan	nan	nan	nan	nan	nan	nan	nan	nan	nan	nan	nan	nan	nan
A_32_P235540						None	None	None	None	None	None	None	None	None	None	None	nan	nan	nan	nan	nan	nan	nan	nan	nan	nan	nan	nan	nan	nan	nan	nan	nan	nan	nan	nan
PARP2	10038	symbol	H. sapiens	10038	H. sapiens	PARP2	poly(ADP-ribose) polymerase 2	PARP2 is a gene that encodes for the poly(ADP-ribosyl)transferase-like 2 protein, which has a catalytic domain capable of catalyzing a poly(ADP-ribosyl)ation reaction. This protein is similar to poly(ADP-ribosyl) transferase but lacks an N-terminal DNA binding domain. The N-terminal region of the protein may have potential DNA-binding properties and may be involved in the nuclear and/or nucleolar…	PARP2 has been implicated in various diseases, including cancer, neurodegenerative disorders, and cardiovascular diseases. In cancer, PARP2 has been shown to play a role in DNA repair and maintenance of genomic stability, making it a potential target for cancer therapy. Several PARP inhibitors, such as olaparib, rucaparib, and niraparib, have been approved for the treatment of ovarian and breast …	GO:0030592 DNA ADP-ribosylation;GO:0110088 hippocampal neuron apoptotic process;GO:0070212 protein poly-ADP-ribosylation		Enzymes; FDA approved drug targets:Small molecule drugs; Predicted intracellular proteins; ENZYME proteins:Transferases	Nucleoplasm (Supported); Additional: Nucleoli	Veliparib; Olaparib; Talazoparib; Niraparib; Rucaparib	(M105)PID TELOMERASE PATHWAY	(M5951)HALLMARK SPERMATOGENESIS; (M5941)HALLMARK UV RESPONSE UP	0.0	0.0	0.0	0.0	0.0	0.0	0.0	1.0	0.0	0.0	0.0	0.0	0.0	0.0	0.0	0.0	0.0	0.0	0.0	0.0
A_24_P145124						None	None	None	None	None	None	None	None	None	None	None	nan	nan	nan	nan	nan	nan	nan	nan	nan	nan	nan	nan	nan	nan	nan	nan	nan	nan	nan	nan
RNF38	152006	symbol	H. sapiens	152006	H. sapiens	RNF38	ring finger protein 38	RNF38 is a human gene that encodes a protein with a coiled-coil motif and a RING-H2 motif at its carboxy-terminus. The RING motif is a zinc-binding domain found in many proteins involved in various cellular processes, including oncogenesis, development, signal transduction, and apoptosis. This gene has multiple transcript variants that encode different isoforms.	There is limited information available on the disease implications of RNF38. However, recent studies have suggested that RNF38 may play a role in cancer development and progression. Specifically, RNF38 has been shown to interact with and regulate the activity of several key proteins involved in cancer, including p53, c-Myc, and NF-κB. Targeted drug discovery efforts for RNF38 are currently underw…	GO:0008584 male gonad development;GO:0046546 development of primary male sexual characteristics;GO:0046661 male sex differentiation		Enzymes; Predicted intracellular proteins; ENZYME proteins:Transferases	Nucleoplasm (Supported)				0.0	0.0	0.0	0.0	0.0	0.0	0.0	0.0	0.0	0.0	0.0	0.0	0.0	0.0	0.0	0.0	0.0	0.0	0.0	0.0
GOLPH3L	55204	symbol	H. sapiens	55204	H. sapiens	GOLPH3L	golgi phosphoprotein 3 like	GOLPH3L is a human gene that encodes a protein localized at the Golgi stack, which plays a crucial role in sorting and modifying proteins exported from the endoplasmic reticulum. The protein may have a regulatory function in Golgi trafficking.	Research has shown that GOLPH3L is involved in various diseases, including cancer, neurodegenerative disorders, and viral infections. In cancer, GOLPH3L has been found to be overexpressed in several types of tumors, including breast, lung, and liver cancer, and is associated with tumor progression and poor prognosis. Targeted drug discovery efforts have focused on developing inhibitors of GOLPH3L…	GO:0140450 protein targeting to Golgi apparatus;GO:0048194 Golgi vesicle budding;GO:0043001 Golgi to plasma membrane protein transport		Predicted intracellular proteins	Golgi apparatus (Supported); Additional: Cytosol				0.0	0.0	0.0	0.0	0.0	1.0	1.0	0.0	0.0	0.0	0.0	0.0	0.0	0.0	0.0	0.0	0.0	0.0	0.0	0.0
CRYM	1428	symbol	H. sapiens	1428	H. sapiens	CRYM	crystallin mu	The CRYM gene encodes a taxon-specific crystallin protein that binds NADPH and has sequence similarity to bacterial ornithine cyclodeaminases. Unlike ubiquitous crystallins, this protein does not perform a structural role in lens tissue. Instead, it binds thyroid hormone for possible regulatory or developmental roles. Mutations in this gene have been associated with autosomal dominant non-syndrom…	Mutations in the CRYM gene have been associated with autosomal dominant non-syndromic deafness, which is characterized by progressive hearing loss that typically begins in early adulthood. While there are currently no targeted drug discovery efforts specifically for CRYM-related deafness, there are several drugs on the market that can help manage hearing loss, such as hearing aids and cochlear im…	GO:0006554 lysine catabolic process;GO:0006553 lysine metabolic process;GO:0070327 thyroid hormone transport		Predicted intracellular proteins; Human disease related genes:Nervous system diseases:Ear disease; ENZYME proteins:Oxidoreductases; Potential drug targets; Disease related genes; Enzymes	Cytosol (Supported)	NRP409			0.0	0.0	0.0	0.0	0.0	0.0	0.0	0.0	0.0	0.0	0.0	0.0	0.0	0.0	0.0	0.0	0.0	0.0	0.0	0.0
MRPL40	64976	symbol	H. sapiens	64976	H. sapiens	MRPL40	mitochondrial ribosomal protein L40	The human gene MRPL40 encodes a protein called mitochondrial ribosomal protein L40, which is a component of the large 39S subunit of mitochondrial ribosomes. Mitochondrial ribosomes are responsible for protein synthesis within the mitochondria, and are composed of both protein and RNA molecules. Unlike prokaryotic ribosomes, which have a higher ratio of RNA to protein, mammalian mitochondrial rib…	Deletions in the MRPL40 gene have been linked to the development of velo-cardio-facial syndrome and DiGeorge syndrome, both of which are genetic disorders that affect multiple organ systems. While there are currently no targeted drug discovery efforts specifically for MRPL40, there are drugs on the market that target mitochondrial function and may be beneficial for individuals with these disorder…	GO:0032543 mitochondrial translation;GO:0140053 mitochondrial gene expression;GO:0006412 translation		Ribosomal proteins; Predicted intracellular proteins	Mitochondria (Supported); Additional: Nucleoli			(M5898)HALLMARK DNA REPAIR	0.0	0.0	0.0	0.0	0.0	0.0	0.0	0.0	0.0	0.0	0.0	0.0	0.0	0.0	0.0	0.0	0.0	0.0	0.0	0.0
NUDT11	55190	symbol	H. sapiens	55190	H. sapiens	NUDT11	nudix hydrolase 11	NUDT11 is a human gene that belongs to a group of enzymes called nudix hydrolases. This gene is involved in the breakdown of diphosphoinositol polyphosphates, which are important signaling molecules in cells. NUDT11 is part of a subgroup of phosphohydrolases that specifically target these molecules. The function of NUDT11 is not fully understood, but it is thought to play a role in regulating cel…	There is limited information available on the disease implications of NUDT11 mutations. However, studies have shown that alterations in the expression of this gene may be associated with certain types of cancer, including breast and ovarian cancer. Targeted drug discovery efforts for NUDT11 are currently underway, with the aim of developing drugs that can modulate the activity of this enzyme. One…	GO:0071543 diphosphoinositol polyphosphate metabolic process;GO:1901906 diadenosine pentaphosphate metabolic process;GO:1901907 diadenosine pentaphosphate catabolic process		ENZYME proteins:Hydrolases; Enzymes; Predicted intracellular proteins	Cytosol (Supported)			(M5956)HALLMARK KRAS SIGNALING DN	0.0	0.0	0.0	0.0	0.0	0.0	0.0	0.0	0.0	0.0	0.0	0.0	0.0	0.0	1.0	0.0	0.0	0.0	0.0	0.0
SRI	6717	symbol	H. sapiens	6717	H. sapiens	SRI	sorcin	The SRI gene encodes a calcium-binding protein called sorcin, which has multiple E-F hand domains. When calcium levels increase, sorcin relocates from the cytoplasm to the sarcoplasmic reticulum. Sorcin plays a role in regulating intracellular calcium levels and modulating excitation-contraction coupling in the heart. Alternative splicing of the gene results in multiple transcript variants that e…	Research has shown that the SRI gene and its protein product, sorcin, are involved in various diseases, including cancer, heart disease, and neurological disorders. In cancer, sorcin has been found to be overexpressed in several types of tumors, including breast, ovarian, and lung cancer, and is associated with drug resistance and poor prognosis. In heart disease, sorcin has been implicated in th…	GO:0006880 intracellular sequestering of iron ion;GO:0097577 sequestering of iron ion;GO:0055118 negative regulation of cardiac muscle contraction		Predicted intracellular proteins	Cytosol;Nucleoplasm (Approved)	Calcium citrate; Calcium Phosphate; Calcium phosphate dihydrate		(M5942)HALLMARK UV RESPONSE DN; (M5913)HALLMARK INTERFERON GAMMA RESPONSE; (M5932)HALLMARK INFLAMMATORY RESPONSE	0.0	0.0	0.0	0.0	0.0	0.0	1.0	0.0	0.0	0.0	0.0	1.0	0.0	0.0	0.0	0.0	0.0	0.0	0.0	0.0
PPM1A	5494	symbol	H. sapiens	5494	H. sapiens	PPM1A	protein phosphatase, Mg2+/Mn2+ dependent 1A	PPM1A is a gene that encodes a protein phosphatase belonging to the PP2C family. This phosphatase is involved in regulating cell stress response pathways by dephosphorylating and negatively regulating the activities of MAP kinases and MAP kinase kinases. It can also inhibit the activation of p38 and JNK kinase cascades induced by environmental stresses and dephosphorylate cyclin-dependent kinases…	Research has shown that PPM1A may play a role in several diseases, including cancer, neurodegenerative disorders, and cardiovascular disease. In cancer, PPM1A has been found to act as a tumor suppressor, and its downregulation has been associated with poor prognosis in several types of cancer. Targeted drug discovery efforts have focused on identifying small molecule inhibitors of PPM1A, which co…	GO:0006499 N-terminal protein myristoylation;GO:0018377 protein myristoylation;GO:0006498 N-terminal protein lipidation		ENZYME proteins:Hydrolases; Enzymes; Predicted intracellular proteins	Cytosol (Supported); Additional: Plasma membrane		(M228)PID SMAD2 3PATHWAY; (M181)PID BMP PATHWAY	(M5896)HALLMARK TGF BETA SIGNALING	0.0	0.0	0.0	0.0	0.0	0.0	1.0	1.0	0.0	0.0	0.0	0.0	0.0	0.0	0.0	0.0	0.0	0.0	0.0	0.0
OSTN	344901	symbol	H. sapiens	344901	H. sapiens	OSTN	osteocrin	OSTN is a human gene that is predicted to have signaling receptor binding activity and is involved in negative regulation of dendrite extension. It is also predicted to be active in the extracellular space. This information is provided by the Alliance of Genome Resources as of April 2022.	There is limited information available on the disease implications of OSTN. However, some studies have suggested that it may play a role in bone metabolism and osteoporosis. Targeted drug discovery efforts for OSTN are also limited, but some research has focused on developing drugs that can modulate its activity in bone cells. One example is sclerostin, a protein that is encoded by the SOST gene …	GO:1903860 negative regulation of dendrite extension;GO:0046325 negative regulation of D-glucose import;GO:0010829 negative regulation of D-glucose transmembrane transport		Predicted secreted proteins					0.0	0.0	0.0	0.0	0.0	0.0	0.0	1.0	0.0	0.0	0.0	1.0	0.0	0.0	0.0	0.0	0.0	0.0	0.0	0.0
SH2D3C	10044	symbol	H. sapiens	10044	H. sapiens	SH2D3C	SH2 domain containing 3C	SH2D3C is a gene that encodes an adaptor protein involved in cell migration. The protein contains a putative Src homology 2 (SH2) domain and guanine nucleotide exchange factor-like domain, allowing it to form a complex with the scaffolding protein Crk-associated substrate. Multiple transcript variants encoding different isoforms have been identified.	There is limited information available on the disease implications of SH2D3C. However, some studies have suggested that mutations in this gene may be associated with certain types of cancer, including breast cancer and hepatocellular carcinoma. Targeted drug discovery efforts for SH2D3C are also limited, as the function of the protein is not well understood. However, some studies have suggested t…	GO:0007254 JNK cascade;GO:0000165 MAPK cascade;GO:0007264 small GTPase-mediated signal transduction		Predicted intracellular proteins	Cytosol (Supported)				0.0	0.0	0.0	0.0	0.0	0.0	0.0	0.0	0.0	0.0	0.0	0.0	0.0	0.0	0.0	0.0	0.0	0.0	0.0	0.0
CCDC51	79714	symbol	H. sapiens	79714	H. sapiens	CCDC51	coiled-coil domain containing 51	CCDC51 is a human gene that encodes a protein called coiled-coil domain containing 51. This protein is involved in the activity of the mitochondrial ATP-gated potassium channel, which is responsible for transporting potassium ions across the mitochondrial inner membrane. CCDC51 is an integral component of this channel complex and plays a crucial role in its function. The gene's function is import…	There is limited information available on the disease implications of CCDC51. However, recent studies have suggested that mutations in this gene may be associated with mitochondrial dysfunction and neurodegenerative disorders such as Parkinson's disease. Targeted drug discovery efforts for CCDC51 are currently underway, with a focus on identifying small molecules that can modulate the activity of…	GO:0140141 mitochondrial potassium ion transmembrane transport;GO:0006884 cell volume homeostasis;GO:1990542 mitochondrial transmembrane transport		FDA approved drug targets:Small molecule drugs; Predicted intracellular proteins	Mitochondria;Nucleoplasm (Supported); Additional: Centrosome	Sevoflurane			0.0	0.0	0.0	0.0	0.0	0.0	0.0	0.0	0.0	0.0	0.0	0.0	0.0	0.0	0.0	0.0	0.0	0.0	0.0	0.0
HMGB3	3149	symbol	H. sapiens	3149	H. sapiens	HMGB3	high mobility group box 3	HMGB3 is a gene that encodes a protein containing high mobility group DNA-binding motifs. This protein is involved in maintaining stem cell populations and may be expressed abnormally in tumor cells. A mutation in this gene has been linked to microphthalmia, syndromic 13. There are multiple pseudogenes of this gene on various chromosomes, and alternative splicing results in multiple transcript va…	There is limited information available on the disease implications of HMGB3. However, a mutation in this gene has been linked to microphthalmia, syndromic 13, which is a rare genetic disorder characterized by small eyes, coloboma, and other developmental abnormalities. As of now, there are no targeted drug discovery efforts specifically for HMGB3. However, there are ongoing efforts to develop dru…	GO:0045578 negative regulation of B cell differentiation;GO:0050869 negative regulation of B cell activation;GO:0045577 regulation of B cell differentiation		Disease related genes; Human disease related genes:Congenital malformations:Congenital malformations of eye; Predicted intracellular proteins	Nucleoplasm (Supported); Additional: Nucleoli			(M5901)HALLMARK G2M CHECKPOINT; (M5925)HALLMARK E2F TARGETS	0.0	0.0	0.0	0.0	0.0	0.0	0.0	0.0	0.0	0.0	0.0	0.0	0.0	0.0	0.0	0.0	0.0	0.0	0.0	0.0
PLS1	5357	symbol	H. sapiens	5357	H. sapiens	PLS1	plastin 1	PLS1, also known as plastin 1, is a gene that encodes for a specific isoform of the plastin family of actin-binding proteins. While two other ubiquitous isoforms have been identified in humans, PLS1 is specifically expressed at high levels in the small intestine. Alternative spliced transcript variants have been found for this gene, but they all encode the same protein. A pseudogene of PLS1 is al…	There is limited information available on the disease implications of PLS1. However, studies have shown that PLS1 expression is upregulated in certain types of cancer, including colorectal cancer and breast cancer. This suggests that PLS1 may play a role in cancer progression and metastasis. Targeted drug discovery efforts for PLS1 are also limited, as there are currently no drugs on the market t…	GO:0060116 vestibular receptor cell morphogenesis;GO:0060121 vestibular receptor cell stereocilium organization;GO:0060114 vestibular receptor cell differentiation		Disease related genes; Predicted intracellular proteins; Human disease related genes:Nervous system diseases:Ear disease	Plasma membrane (Approved)				0.0	0.0	1.0	0.0	0.0	0.0	1.0	0.0	0.0	0.0	0.0	0.0	0.0	0.0	0.0	1.0	0.0	1.0	0.0	0.0
SLC22A9	114571	symbol	H. sapiens	114571	H. sapiens	SLC22A9	solute carrier family 22 member 9	SLC22A9 is a human gene that encodes a protein belonging to the solute carrier family 22 member 9. This protein is involved in transporting anions, short-chain fatty acids, and organic anions across the cell membrane. It plays a role in hormone transport, short-chain fatty acid import, and sodium-independent organic anion transport. The protein is located in the basolateral plasma membrane.	There is limited information available on the disease implications of SLC22A9. However, studies have suggested that genetic variations in this gene may be associated with an increased risk of gout, a type of arthritis caused by the buildup of uric acid crystals in the joints. Targeted drug discovery efforts for SLC22A9 have focused on developing drugs that can modulate its activity to treat gout …	GO:0015913 short-chain fatty acid transmembrane transport;GO:0015912 short-chain fatty acid transport;GO:1902001 fatty acid transmembrane transport		Transporters:Electrochemical Potential-driven transporters					0.0	0.0	0.0	0.0	0.0	0.0	0.0	0.0	0.0	0.0	0.0	0.0	0.0	0.0	0.0	0.0	0.0	0.0	0.0	0.0
B3GALT2	8707	symbol	H. sapiens	8707	H. sapiens	B3GALT2	beta-1,3-galactosyltransferase 2	B3GALT2 is a gene that belongs to the beta-1,3-galactosyltransferase (beta3GalT) family. This family encodes glycoproteins that have different enzymatic functions using different donor substrates and acceptor sugars. The beta3GalT genes are distantly related to the Drosophila Brainiac gene and have the protein coding sequence contained in a single exon. The carbohydrate chains synthesized by thes…	Mutations in the B3GALT2 gene have been associated with a rare genetic disorder called Ehlers-Danlos syndrome (EDS), specifically the EDS progeroid type. This syndrome is characterized by premature aging, joint hypermobility, skin hyperextensibility, and a predisposition to fractures. There are currently no targeted drug discovery efforts for B3GALT2, as the underlying cause of EDS progeroid type…	GO:0006682 galactosylceramide biosynthetic process;GO:0019375 galactolipid biosynthetic process;GO:0046476 glycosylceramide biosynthetic process		Enzymes; ENZYME proteins:Transferases	Plasma membrane (Approved)				0.0	0.0	0.0	0.0	0.0	0.0	0.0	0.0	0.0	0.0	0.0	0.0	0.0	0.0	1.0	0.0	0.0	0.0	0.0	0.0
A_32_P113173						None	None	None	None	None	None	None	None	None	None	None	nan	nan	nan	nan	nan	nan	nan	nan	nan	nan	nan	nan	nan	nan	nan	nan	nan	nan	nan	nan
PRPH2	5961	symbol	H. sapiens	5961	H. sapiens	PRPH2	peripherin 2	PRPH2, also known as peripherin 2, is a cell surface glycoprotein found in the outer segment of both rod and cone photoreceptor cells. It belongs to the transmembrane 4 superfamily, which mediates signal transduction events that play a role in the regulation of cell development, activation, growth, and motility. PRPH2 may function as an adhesion molecule involved in stabilization and compaction o…	Mutations in the PRPH2 gene have been associated with various forms of inherited retinal degenerations, including autosomal dominant retinitis pigmentosa (adRP), macular dystrophy, and cone-rod dystrophy. These diseases are characterized by progressive loss of vision due to the degeneration of photoreceptor cells in the retina. There are currently no approved drugs that target PRPH2 specifically,…	GO:0009645 response to low light intensity stimulus;GO:0035845 photoreceptor cell outer segment organization;GO:0009642 response to light intensity		Disease related genes; Transporters:Accessory Factors Involved in Transport; Human disease related genes:Nervous system diseases:Eye disease; Potential drug targets					0.0	0.0	0.0	0.0	0.0	1.0	0.0	0.0	0.0	0.0	0.0	0.0	0.0	0.0	0.0	0.0	0.0	0.0	0.0	0.0
FAM71E1	112703	gene_synonym	H. sapiens	112703	H. sapiens	GARIN5A	golgi associated RAB2 interactor 5A	GARIN5A is a human gene that encodes for a protein called Golgi-associated RAB2 interactor 5A. This protein is involved in the regulation of protein trafficking and secretion within cells. It interacts with the small GTPase RAB2, which is important for the transport of proteins from the endoplasmic reticulum to the Golgi apparatus. GARIN5A has also been implicated in the regulation of autophagy, …	There is limited information available on the disease implications of GARIN5A, but mutations in this gene have been associated with various conditions. For example, a study found that GARIN5A expression was significantly decreased in patients with colorectal cancer, suggesting that it may play a role in the development and progression of this disease. Additionally, mutations in GARIN5A have been …	GO:0032481 positive regulation of type I interferon production;GO:0032479 regulation of type I interferon production;GO:0051607 defense response to virus		Predicted intracellular proteins	Nucleoli fibrillar center (Approved)				0.0	0.0	0.0	0.0	0.0	0.0	0.0	0.0	0.0	0.0	0.0	0.0	0.0	0.0	0.0	0.0	0.0	0.0	0.0	0.0
A_32_P346000						None	None	None	None	None	None	None	None	None	None	None	nan	nan	nan	nan	nan	nan	nan	nan	nan	nan	nan	nan	nan	nan	nan	nan	nan	nan	nan	nan
A_24_P213034						None	None	None	None	None	None	None	None	None	None	None	nan	nan	nan	nan	nan	nan	nan	nan	nan	nan	nan	nan	nan	nan	nan	nan	nan	nan	nan	nan
CHCHD10	400916	symbol	H. sapiens	400916	H. sapiens	CHCHD10	coiled-coil-helix-coiled-coil-helix domain containing 10	CHCHD10 is a gene that encodes a mitochondrial protein that is primarily found at cristae junctions in the intermembrane space. The protein may be involved in maintaining cristae morphology or oxidative phosphorylation. Mutations in CHCHD10 have been linked to frontotemporal dementia and/or amyotrophic lateral sclerosis-2. The gene undergoes alternative splicing, resulting in multiple transcript …	Mutations in CHCHD10 have been linked to frontotemporal dementia and/or amyotrophic lateral sclerosis-2 (FTD/ALS-2), which are neurodegenerative disorders characterized by the progressive loss of neurons in the brain and spinal cord. There are currently no targeted drug therapies available for FTD/ALS-2, and treatment is mainly supportive. However, there are ongoing efforts to develop drugs that …	GO:0090143 nucleoid organization;GO:0090144 mitochondrial nucleoid organization;GO:0031930 mitochondria-nucleus signaling pathway		Disease related genes; Human disease related genes:Nervous system diseases:Neurodegenerative diseases; Predicted intracellular proteins	Mitochondria (Supported)			(M5905)HALLMARK ADIPOGENESIS	1.0	0.0	0.0	0.0	0.0	0.0	0.0	0.0	0.0	0.0	0.0	1.0	0.0	0.0	0.0	0.0	0.0	0.0	0.0	0.0
AC112641.2						None	None	None	None	None	None	None	None	None	None	None	nan	nan	nan	nan	nan	nan	nan	nan	nan	nan	nan	nan	nan	nan	nan	nan	nan	nan	nan	nan
SPANXN4	441525	symbol	H. sapiens	441525	H. sapiens	SPANXN4	SPANX family member N4	SPANXN4 is a gene located on the X chromosome that encodes a protein involved in spermiogenesis. It is a member of the SPANX family, which is a group of duplicated genes that encode cancer/testis-associated antigens. These proteins may be useful as candidates for tumor vaccines. SPANXN4 belongs to a subgroup of related genes that are present in all primates and rats and mice, making it one of the…	Unfortunately, there is currently limited information available on the disease implications and targeted drug discovery efforts for SPANXN4. As a member of the SPANX family, it has been suggested that this gene may have potential as a target for cancer immunotherapy. However, further research is needed to determine its specific role in cancer development and progression. Currently, there are no d…			Predicted intracellular proteins	Plasma membrane;Vesicles (Uncertain); Additional: Nuclear membrane				0.0	0.0	0.0	0.0	0.0	0.0	0.0	0.0	0.0	0.0	0.0	0.0	0.0	0.0	0.0	0.0	0.0	0.0	0.0	0.0
USP8	9101	symbol	H. sapiens	9101	H. sapiens	USP8	ubiquitin specific peptidase 8	USP8 is a gene that encodes a protein belonging to the ubiquitin-specific processing protease family. This protein is involved in regulating the morphology of the endosome by ubiquitination of proteins on this organelle, and it plays a role in cargo sorting and membrane trafficking at the early endosome stage. Additionally, USP8 is required for the cell to enter the S phase of the cell cycle and …	USP8 has been implicated in several diseases, including cancer and neurodegenerative disorders. In particular, mutations in USP8 have been found in pituitary adenomas, a type of brain tumor that arises from the pituitary gland. These mutations result in increased activity of USP8, leading to the stabilization of growth factor receptors and increased cell proliferation. Therefore, USP8 has been id…	GO:0099576 regulation of protein catabolic process at postsynapse, modulating synaptic transmission;GO:1904351 negative regulation of protein catabolic process in the vacuole;GO:1905166 negative regulation of lysosomal protein catabolic process		Predicted intracellular proteins; Human disease related genes:Endocrine and metabolic diseases:Hypothalamus and pituitary gland diseases; Cancer-related genes; Peptidases:Cysteine-type peptidases; Human disease related genes:Endocrine and metabolic diseases:Adrenal gland diseases; Potential drug targets; Disease related genes; ENZYME proteins:Hydrolases; Enzymes	Golgi apparatus (Approved); Additional: Cytosol		(M214)PID ERBB1 INTERNALIZATION PATHWAY; (M175)PID ERBB2 ERBB3 PATHWAY	(M5921)HALLMARK COMPLEMENT	0.0	0.0	0.0	1.0	0.0	0.0	0.0	1.0	0.0	1.0	0.0	0.0	0.0	0.0	0.0	0.0	1.0	0.0	0.0	0.0
GRINA	2907	symbol	H. sapiens	2907	H. sapiens	GRINA	glutamate ionotropic receptor NMDA type subunit associated protein 1	GRINA is a human gene that is predicted to have transmembrane transporter binding activity. It is also predicted to play a role in endoplasmic reticulum calcium ion homeostasis and negative regulation of endoplasmic reticulum stress-induced intrinsic apoptotic signaling pathway. The gene is predicted to be located in the Golgi apparatus and endoplasmic reticulum and is an integral component of th…	Unfortunately, there is currently limited information available on the disease implications and targeted drug discovery efforts for GRINA. However, some studies have suggested that dysregulation of endoplasmic reticulum calcium ion homeostasis and the intrinsic apoptotic signaling pathway, which are predicted to be influenced by GRINA, may be involved in the pathogenesis of various diseases, incl…	GO:1902236 negative regulation of endoplasmic reticulum stress-induced intrinsic apoptotic signaling pathway;GO:0032469 endoplasmic reticulum calcium ion homeostasis;GO:1902042 negative regulation of extrinsic apoptotic signaling pathway via death domain receptors		Transporters:Transporter channels and pores; Predicted intracellular proteins	Nucleoli fibrillar center (Approved); Additional: Cytosol			(M5941)HALLMARK UV RESPONSE UP	0.0	0.0	0.0	0.0	1.0	0.0	0.0	0.0	0.0	0.0	0.0	0.0	0.0	0.0	0.0	0.0	0.0	0.0	0.0	0.0
KDM4D	55693	symbol	H. sapiens	55693	H. sapiens	KDM4D	lysine demethylase 4D	KDM4D is a human gene that encodes for lysine demethylase 4D, an enzyme that is involved in histone H3-K9 demethylation. It enables histone H3-methyl-lysine-9 demethylase activity and is located in the site of double-strand break. KDM4D is involved in several processes, including cellular response to ionizing radiation, positive regulation of chromatin binding activity, and positive regulation of…	There is limited information available on the disease implications of KDM4D. However, it has been identified as a potential biomarker for nephroblastoma, a type of kidney cancer that primarily affects children. Targeted drug discovery efforts for KDM4D are also limited, but there have been some studies exploring the potential of KDM4D inhibitors as a therapeutic strategy for cancer treatment. One…	GO:0035563 positive regulation of chromatin binding;GO:0035561 regulation of chromatin binding;GO:2001034 positive regulation of double-strand break repair via nonhomologous end joining		Enzymes; ENZYME proteins:Oxidoreductases; Predicted intracellular proteins	Nucleoplasm (Approved)				0.0	0.0	0.0	0.0	1.0	0.0	0.0	0.0	0.0	0.0	0.0	0.0	0.0	0.0	0.0	0.0	0.0	0.0	0.0	0.0
PPME1	51400	symbol	H. sapiens	51400	H. sapiens	PPME1	protein phosphatase methylesterase 1	PPME1 is a gene that encodes a protein phosphatase methylesterase that is found in the nucleus. This protein is responsible for dephosphorylating regulatory proteins in the ERK pathway by acting on the protein phosphatase-2A catalytic subunit. PPME1 plays a role in the progression of malignant glioma. Alternative splicing of the gene results in multiple transcript variants.	PPME1 has been implicated in various diseases, including cancer and neurodegenerative disorders. In particular, PPME1 has been shown to play a role in the progression of malignant glioma, a type of brain cancer. Targeting PPME1 has been proposed as a potential therapeutic strategy for glioma treatment. However, there are currently no drugs on the market that specifically target PPME1. There have …	GO:0006482 protein demethylation;GO:0008214 protein dealkylation;GO:0070988 demethylation		ENZYME proteins:Hydrolases; Enzymes; Predicted intracellular proteins	Nucleoplasm (Supported); Additional: Nuclear bodies				0.0	0.0	0.0	0.0	0.0	0.0	0.0	0.0	0.0	0.0	0.0	0.0	0.0	0.0	0.0	0.0	0.0	0.0	0.0	0.0
CUL4B	8450	symbol	H. sapiens	8450	H. sapiens	CUL4B	cullin 4B	CUL4B is a gene that belongs to the cullin family and encodes a protein that acts as an E3 ubiquitin ligase. This protein forms a complex that catalyzes the polyubiquitination of specific protein substrates in the cell. It interacts with a ring finger protein and is necessary for the proteolysis of several regulators of DNA replication, including chromatin licensing and DNA replication factor 1 a…	Mutations in the CUL4B gene have been associated with X-linked intellectual disability (XLID), a condition characterized by impaired cognitive function and intellectual disability. Additionally, CUL4B has been implicated in the development of several types of cancer, including breast, lung, and liver cancer. As a result, there has been interest in developing drugs that target CUL4B as a potential…	GO:0070914 UV-damage excision repair;GO:1900087 positive regulation of G1/S transition of mitotic cell cycle;GO:0048708 astrocyte differentiation		Disease related genes; Human disease related genes:Other diseases:Mental and behavioural disorders; Cancer-related genes:Mutated cancer genes; Predicted intracellular proteins	Nucleoplasm (Enhanced)				0.0	0.0	1.0	0.0	0.0	0.0	0.0	0.0	0.0	0.0	0.0	0.0	0.0	0.0	0.0	0.0	0.0	0.0	0.0	0.0
MACROD2	140733	symbol	H. sapiens	140733	H. sapiens	MACROD2	mono-ADP ribosylhydrolase 2	MACROD2 is a human gene that encodes a deacetylase enzyme responsible for removing ADP-ribose from mono-ADP-ribosylated proteins. This gene has been shown to translocate from the nucleus to the cytoplasm in response to DNA damage.	Research on MACROD2 has revealed its potential involvement in various diseases, including cancer, neurodegenerative disorders, and autoimmune diseases. Studies have shown that MACROD2 is downregulated in certain types of cancer, such as breast and ovarian cancer, and its overexpression can inhibit cancer cell growth. Additionally, mutations in MACROD2 have been linked to neurodegenerative disorde…	GO:0140291 peptidyl-glutamate ADP-deribosylation;GO:0051725 protein de-ADP-ribosylation;GO:0042278 purine nucleoside metabolic process		Predicted intracellular proteins	Nucleoli;Nucleoplasm (Supported)				0.0	1.0	0.0	0.0	0.0	0.0	0.0	0.0	0.0	0.0	0.0	0.0	0.0	0.0	1.0	0.0	0.0	0.0	0.0	0.0
PRODH2	58510	symbol	H. sapiens	58510	H. sapiens	PRODH2	proline dehydrogenase 2	PRODH2 is a gene that encodes a protein responsible for the initial step in breaking down trans-4-hydroxy-L-proline, an amino acid derivative found in food and collagen. The catabolism of this compound produces glyoxylate, which can lead to an increase in oxalate levels and the formation of calcium-oxalate kidney stones in individuals with glyoxalate metabolism disorders. Therefore, PRODH2 may be…	There is currently limited information available on targeted drug discovery efforts for PRODH2. However, given its potential role in primary hyperoxalurias, there is interest in developing drugs that can modulate its activity to reduce oxalate production and prevent the formation of kidney stones. One potential approach is to develop small molecule inhibitors that can selectively target PRODH2 an…	GO:0010133 proline catabolic process to glutamate;GO:0006562 proline catabolic process;GO:0006560 proline metabolic process		Enzymes; ENZYME proteins:Oxidoreductases; Predicted intracellular proteins	Nucleoplasm (Approved); Additional: Cytosol				0.0	0.0	0.0	0.0	0.0	0.0	0.0	0.0	0.0	0.0	0.0	0.0	0.0	0.0	0.0	0.0	0.0	0.0	0.0	0.0
ADCY2	108	symbol	H. sapiens	108	H. sapiens	ADCY2	adenylate cyclase 2	ADCY2 is a gene that encodes for an enzyme called adenylate cyclase 2. This enzyme is responsible for catalyzing the formation of cyclic adenosine monophosphate (cAMP), which is a secondary messenger molecule involved in various cellular processes. Unlike other adenylate cyclases, ADCY2 is not sensitive to calcium/calmodulin and is instead stimulated by the G protein beta and gamma subunit comple…	Mutations in the ADCY2 gene have been associated with various diseases, including obesity and type 2 diabetes. Targeted drug discovery efforts have focused on developing drugs that can modulate the activity of ADCY2 and improve insulin secretion and glucose metabolism. One example of a successful drug on the market is exenatide, a glucagon-like peptide-1 (GLP-1) receptor agonist that stimulates i…	GO:0006171 cAMP biosynthetic process;GO:1904321 response to forskolin;GO:1904322 cellular response to forskolin		ENZYME proteins:Lyases; Enzymes; Predicted intracellular proteins	Golgi apparatus;Vesicles (Approved); Additional: Primary cilium	Colforsin; 2',5'-DIDEOXY-ADENOSINE 3'-MONOPHOSPHATE; Aurothioglucose	(M56)PID LPA4 PATHWAY; (M8)PID ENDOTHELIN PATHWAY; (M15)PID LYSOPHOSPHOLIPID PATHWAY	(M5923)HALLMARK PI3K AKT MTOR SIGNALING	0.0	0.0	0.0	0.0	0.0	0.0	0.0	1.0	0.0	0.0	1.0	0.0	1.0	0.0	1.0	0.0	0.0	0.0	0.0	0.0
GABRB1	2560	symbol	H. sapiens	2560	H. sapiens	GABRB1	gamma-aminobutyric acid type A receptor subunit beta1	GABRB1 is a gene that encodes the beta 1 subunit of the gamma-aminobutyric acid (GABA) A receptor, which is a chloride channel that plays a crucial role in inhibitory synaptic transmission in the central nervous system. The gene is located on chromosome 4p12 and is part of a cluster of genes that encode other subunits of the GABA A receptor. Alterations in the GABRB1 gene have been linked to the …	Alterations in the GABRB1 gene have been linked to the development of schizophrenia, a severe mental disorder characterized by delusions, hallucinations, disorganized thinking, and abnormal behavior. Targeted drug discovery efforts have focused on developing drugs that modulate the activity of the GABA A receptor, including benzodiazepines, barbiturates, and non-benzodiazepine hypnotics. These dr…	GO:0071420 cellular response to histamine;GO:0034776 response to histamine;GO:0007214 gamma-aminobutyric acid signaling pathway		Disease related genes; Human disease related genes:Nervous system diseases:Epilepsy; FDA approved drug targets:Small molecule drugs; Predicted intracellular proteins		Lindane; Ethanol; gamma-Hydroxybutyric acid; Fludiazepam			0.0	0.0	0.0	0.0	0.0	0.0	0.0	1.0	0.0	0.0	1.0	1.0	0.0	0.0	0.0	0.0	0.0	0.0	0.0	1.0
PI4KA	5297	symbol	H. sapiens	5297	H. sapiens	PI4KA	phosphatidylinositol 4-kinase alpha	PI4KA is a gene that encodes a type III phosphatidylinositol (PI) 4-kinase, which is an enzyme that catalyzes the first step in the biosynthesis of phosphatidylinositol 4,5-bisphosphate. This gene is not inhibited by adenosine and has multiple transcript variants that encode distinct isoforms due to alternative splicing. The mammalian PI 4-kinases are classified into two types, II and III, based …	Mutations in the PI4KA gene have been associated with various diseases, including cancer and neurological disorders. In cancer, PI4KA has been shown to be overexpressed in several types of tumors, including breast, lung, and pancreatic cancer, and is associated with tumor growth and metastasis. Therefore, PI4KA has been identified as a potential therapeutic target for cancer treatment. Several sm…	GO:0140754 reorganization of cellular membranes to establish viral sites of replication;GO:0048015 phosphatidylinositol-mediated signaling;GO:0044788 modulation by host of viral process	yes	Human disease related genes:Nervous system diseases:Other nervous and sensory system diseases; Predicted intracellular proteins; Human disease related genes:Congenital malformations:Congenital malformations of the nervous system; ENZYME proteins:Transferases; Potential drug targets; Disease related genes; Enzymes	Nucleoplasm (Approved); Additional: Plasma membrane		(M160)PID AVB3 INTEGRIN PATHWAY		0.0	0.0	0.0	0.0	0.0	0.0	0.0	0.0	0.0	0.0	0.0	0.0	0.0	0.0	0.0	0.0	0.0	0.0	0.0	0.0
LDHA	3939	symbol	H. sapiens	3939	H. sapiens	LDHA	lactate dehydrogenase A	LDHA is a gene that encodes for the protein lactate dehydrogenase A, which is responsible for converting L-lactate and NAD to pyruvate and NADH in the final step of anaerobic glycolysis. This protein is primarily found in muscle tissue and belongs to the lactate dehydrogenase family. Mutations in this gene have been linked to exertional myoglobinuria, a condition characterized by muscle pain and …	LDHA has been implicated in various diseases, including cancer, metabolic disorders, and neurodegenerative diseases. In cancer, LDHA is upregulated and plays a critical role in promoting tumor growth and survival by facilitating the conversion of glucose to lactate, which helps cancer cells to adapt to hypoxic conditions. Therefore, LDHA has emerged as a potential therapeutic target for cancer tr…	GO:0006089 lactate metabolic process;GO:0021762 substantia nigra development;GO:0006096 glycolytic process		Predicted intracellular proteins; ENZYME proteins:Oxidoreductases; FDA approved drug targets:Small molecule drugs; Human disease related genes:Congenital disorders of metabolism:Congenital disorders of carbohydrate metabolism; Disease related genes; Enzymes; Cancer-related genes:Candidate cancer biomarkers	Cytosol (Supported)	NADH; Etheno-NAD; Nicotinamide; Oxamic Acid; Stiripentol; Copper; Artenimol	(M255)PID HIF1 TFPATHWAY; (M66)PID MYC ACTIV PATHWAY	(M5935)HALLMARK FATTY ACID METABOLISM; (M5891)HALLMARK HYPOXIA; (M5924)HALLMARK MTORC1 SIGNALING	0.0	1.0	0.0	0.0	0.0	0.0	0.0	1.0	0.0	0.0	0.0	0.0	1.0	0.0	1.0	0.0	0.0	0.0	0.0	0.0
RXFP1	59350	symbol	H. sapiens	59350	H. sapiens	RXFP1	relaxin family peptide receptor 1	The RXFP1 gene is a member of the G protein-coupled 7-transmembrane receptor superfamily and encodes a protein that acts as a receptor for the hormone relaxin. This protein plays a crucial role in sperm motility, pregnancy, and parturition. Reduced expression of this gene may be involved in endometriosis. Multiple isoforms of the protein are produced due to alternative splicing of the transcript …	The RXFP1 gene has been implicated in several diseases, including endometriosis, fibrosis, and cancer. In endometriosis, reduced expression of RXFP1 has been observed, suggesting a potential role in the pathogenesis of the disease. Targeted drug discovery efforts have focused on developing agonists and antagonists of the RXFP1 receptor for the treatment of various diseases. Several drugs targetin…	GO:0060618 nipple development;GO:0060658 nipple morphogenesis;GO:0060427 lung connective tissue development		G-protein coupled receptors:GPCRs excl olfactory receptors; Transporters					0.0	0.0	0.0	0.0	0.0	0.0	0.0	1.0	0.0	0.0	1.0	0.0	1.0	0.0	0.0	0.0	0.0	0.0	0.0	0.0
LIN52	91750	symbol	H. sapiens	91750	H. sapiens	LIN52	lin-52 DREAM MuvB core complex component	LIN52 is a human gene that is predicted to be involved in transcription, specifically DNA-templated transcription. It is also predicted to be located in the nucleoplasm and to be a part of the DREAM MuvB core complex. This complex is involved in regulating the cell cycle and is important for proper cell division. LIN52's role in this complex suggests that it may play a critical role in regulating…	There is limited information available on the disease implications of LIN52. However, some studies have suggested that alterations in the DREAM MuvB complex, of which LIN52 is a part, may be associated with cancer development and progression. Targeted drug discovery efforts for LIN52 are also limited, as its function and role in disease are not yet fully understood. Currently, there are no drugs …	GO:0006355 regulation of DNA-templated transcription;GO:2001141 regulation of RNA biosynthetic process;GO:0051252 regulation of RNA metabolic process		Predicted intracellular proteins	Nuclear speckles (Approved)				0.0	0.0	0.0	0.0	0.0	0.0	0.0	0.0	0.0	0.0	0.0	0.0	0.0	0.0	0.0	0.0	0.0	0.0	0.0	0.0
CMC1	152100	symbol	H. sapiens	152100	H. sapiens	CMC1	C-X9-C motif containing 1	The human gene CMC1, also known as C-X9-C motif containing 1, is predicted to have metal ion binding activity. It is located in the mitochondrion, which is the organelle responsible for producing energy in cells. The function of CMC1 is not yet fully understood, but it may play a role in mitochondrial function and energy production. Further research is needed to fully understand the role of CMC1 …	There is limited information available on the disease implications of CMC1. However, mutations in this gene have been associated with mitochondrial disorders, which are a group of genetic disorders that affect the function of the mitochondria. These disorders can cause a wide range of symptoms, including muscle weakness, neurological problems, and developmental delays. As for targeted drug discov…			Predicted intracellular proteins					0.0	0.0	0.0	0.0	0.0	0.0	0.0	0.0	0.0	0.0	0.0	0.0	0.0	0.0	0.0	0.0	0.0	0.0	0.0	0.0
SULF1	23213	symbol	H. sapiens	23213	H. sapiens	SULF1	sulfatase 1	SULF1 is a gene that encodes an enzyme called extracellular heparan sulfate endosulfatase. This enzyme is responsible for removing 6-O-sulfate groups from heparan sulfate proteoglycans (HSPGs) in the extracellular matrix. The enzyme is secreted through the Golgi and is subsequently localized to the cell surface. The expression of SULF1 may be down-regulated in several types of cancer, including h…	SULF1 has been implicated in several diseases, including cancer, inflammation, and cardiovascular disease. In cancer, SULF1 has been shown to act as a tumor suppressor by inhibiting tumor growth and metastasis. Targeted drug discovery efforts have focused on developing small molecule inhibitors of SULF1 as potential cancer therapeutics. One example is the drug SUL-121, which has been shown to inh…	GO:0014846 esophagus smooth muscle contraction;GO:0060686 negative regulation of prostatic bud formation;GO:0060685 regulation of prostatic bud formation		Predicted secreted proteins; Predicted intracellular proteins			(M3468)NABA ECM REGULATORS; (M5885)NABA MATRISOME ASSOCIATED; (M5889)NABA MATRISOME		0.0	0.0	0.0	0.0	0.0	0.0	0.0	1.0	0.0	0.0	0.0	0.0	0.0	0.0	0.0	0.0	0.0	0.0	0.0	0.0
TMEM132D	121256	symbol	H. sapiens	121256	H. sapiens	TMEM132D	transmembrane protein 132D	TMEM132D is a gene that encodes for a transmembrane protein called transmembrane protein 132D. This protein is found in the cell membrane and is involved in various cellular processes, including signal transduction and cell adhesion. Mutations in this gene have been associated with several neurological disorders, including anxiety and depression. Studies have also shown that TMEM132D may play a r…	TMEM132D has been associated with several neurological disorders, including anxiety and depression. Studies have shown that mutations in this gene may contribute to the development of these disorders by altering the function of the protein and disrupting normal cellular processes. As a result, TMEM132D has become a target for drug discovery efforts aimed at developing new treatments for anxiety a…								0.0	0.0	0.0	0.0	0.0	0.0	0.0	0.0	0.0	0.0	0.0	0.0	0.0	0.0	0.0	0.0	0.0	0.0	0.0	0.0
ILVBL	10994	symbol	H. sapiens	10994	H. sapiens	ILVBL	ilvB acetolactate synthase like	ILVBL is a human gene that encodes a protein with similarities to thiamine pyrophosphate-binding proteins found in bacteria, yeast, and plants. The protein has the highest degree of similarity with bacterial acetolactate synthases (AHAS), which are enzymes that catalyze the first step in branched-chain amino acid biosynthesis. The function of ILVBL in humans is not fully understood, but it is bel…	Mutations in the ILVBL gene have been associated with a rare genetic disorder called Maple Syrup Urine Disease (MSUD). MSUD is a metabolic disorder that affects the breakdown of branched-chain amino acids, leading to a buildup of toxic byproducts in the body. There are currently no targeted drug discovery efforts specifically for ILVBL, but there are treatments available for MSUD, including dieta…	GO:0009097 isoleucine biosynthetic process;GO:0009082 branched-chain amino acid biosynthetic process;GO:0009079 pyruvate family amino acid biosynthetic process		Predicted intracellular proteins	Golgi apparatus;Vesicles (Approved)			(M5891)HALLMARK HYPOXIA	0.0	0.0	0.0	0.0	0.0	0.0	0.0	0.0	0.0	0.0	0.0	0.0	0.0	0.0	0.0	0.0	0.0	0.0	0.0	0.0
C6orf59	79992	gene_synonym	H. sapiens	79992	H. sapiens	AGPAT4-IT1	AGPAT4 intronic transcript 1										0.0	0.0	0.0	0.0	0.0	0.0	0.0	0.0	0.0	0.0	0.0	0.0	0.0	0.0	0.0	0.0	0.0	0.0	0.0	0.0
LNX1	84708	symbol	H. sapiens	84708	H. sapiens	LNX1	ligand of numb-protein X 1	LNX1 is a gene that encodes a membrane-bound protein involved in signal transduction and protein interactions. The protein is an E3 ubiquitin-protein ligase, which mediates ubiquitination and subsequent proteasomal degradation of proteins containing phosphotyrosine binding (PTB) domains. LNX1 may play a role in tumorogenesis. The gene has alternatively spliced transcript variants encoding distinc…	There is limited information available on the disease implications of LNX1. However, some studies have suggested that LNX1 may play a role in tumorogenesis, particularly in breast cancer. Targeted drug discovery efforts for LNX1 are also limited, as the function of the protein is not well understood. Currently, there are no drugs on the market that specifically target LNX1. However, there are dru…	GO:0060074 synapse maturation;GO:0021700 developmental maturation;GO:0050808 synapse organization		Enzymes; Predicted intracellular proteins; ENZYME proteins:Transferases	Cell Junctions (Supported); Additional: Cytosol		(M17)PID NOTCH PATHWAY		1.0	0.0	0.0	0.0	0.0	0.0	0.0	0.0	0.0	0.0	0.0	0.0	0.0	0.0	0.0	0.0	0.0	0.0	0.0	0.0
BRP44	25874	gene_synonym	H. sapiens	25874	H. sapiens	MPC2	mitochondrial pyruvate carrier 2	MPC2 is a human gene that encodes for mitochondrial pyruvate carrier 2, which is involved in the transport of pyruvate across the mitochondrial membrane. It is predicted to play a role in the biosynthesis of acetyl-CoA from pyruvate and in the regulation of insulin secretion in response to glucose stimulus. The gene is located in the mitochondrion and has been shown to have identical protein bind…	Research on MPC2 has shown its potential implications in various diseases, including cancer, diabetes, and neurodegenerative disorders. In cancer, MPC2 has been found to play a role in regulating the metabolism of cancer cells, making it a potential target for cancer therapy. In diabetes, MPC2 has been linked to insulin secretion and glucose metabolism, making it a potential target for the develo…	GO:0006850 mitochondrial pyruvate transmembrane transport;GO:0006086 acetyl-CoA biosynthetic process from pyruvate;GO:1901475 pyruvate transmembrane transport		Transporters:Electrochemical Potential-driven transporters; Predicted intracellular proteins				(M5898)HALLMARK DNA REPAIR	0.0	0.0	0.0	0.0	0.0	0.0	1.0	0.0	0.0	0.0	0.0	0.0	0.0	0.0	1.0	0.0	0.0	0.0	0.0	0.0
CXCL14	9547	symbol	H. sapiens	9547	H. sapiens	CXCL14	C-X-C motif chemokine ligand 14	CXCL14 is a gene that belongs to the cytokine gene family and encodes a protein involved in immunoregulatory and inflammatory processes. It is structurally related to the CXC subfamily of cytokines and displays chemotactic activity for monocytes. However, it does not display chemotactic activity for lymphocytes, dendritic cells, neutrophils, or macrophages. CXCL14 has been implicated in the homeo…	CXCL14 has been implicated in various diseases, including cancer, obesity, and diabetes. In cancer, CXCL14 has been shown to have both tumor-suppressive and tumor-promoting effects, depending on the type of cancer and the stage of the disease. In obesity and diabetes, CXCL14 has been linked to insulin resistance and inflammation. Targeted drug discovery efforts for CXCL14 have focused on developi…	GO:0031640 killing of cells of another organism;GO:0141061 disruption of cell in another organism;GO:0141060 disruption of anatomical structure in another organism		Predicted secreted proteins			(M5883)NABA SECRETED FACTORS; (M5885)NABA MATRISOME ASSOCIATED; (M5889)NABA MATRISOME	(M5907)HALLMARK ESTROGEN RESPONSE LATE	0.0	0.0	0.0	0.0	0.0	0.0	0.0	1.0	0.0	0.0	0.0	0.0	0.0	0.0	0.0	0.0	0.0	0.0	0.0	0.0
COPS7A	50813	symbol	H. sapiens	50813	H. sapiens	COPS7A	COP9 signalosome subunit 7A	COPS7A is a gene that encodes a protein that is a part of the COP9 signalosome, which is a multi-subunit protease that regulates the activity of the ubiquitin conjugation pathway. This pathway is responsible for the degradation of proteins in cells. The protein encoded by COPS7A is involved in the regulation of this pathway and is essential for the proper functioning of cells. There are different…	There is limited information available on the disease implications of COPS7A. However, some studies have suggested that mutations in this gene may be associated with certain types of cancer, including breast cancer and hepatocellular carcinoma. Targeted drug discovery efforts for COPS7A are also limited, as the protein is part of a complex and its specific role in disease is not well understood. …	GO:0010387 COP9 signalosome assembly;GO:0000338 protein deneddylation;GO:2000434 regulation of protein neddylation		Predicted intracellular proteins	Nucleoplasm (Supported); Additional: Cytosol				0.0	0.0	0.0	0.0	0.0	0.0	0.0	0.0	0.0	0.0	0.0	0.0	0.0	0.0	0.0	0.0	0.0	0.0	0.0	0.0
ZNF622	90441	symbol	H. sapiens	90441	H. sapiens	ZNF622	zinc finger protein 622	ZNF622 is a human gene that encodes for a zinc finger protein 622. This protein is involved in various biological processes, including the intrinsic apoptotic signaling pathway in response to oxidative stress, positive regulation of JNK cascade, and positive regulation of kinase activity. It enables RNA binding activity and is located in the Golgi apparatus, cytosol, and nuclear lumen. The inform…	There is limited information available on the disease implications of ZNF622. However, some studies have suggested that mutations in this gene may be associated with certain types of cancer, including breast cancer and hepatocellular carcinoma. Additionally, ZNF622 has been identified as a potential therapeutic target for the treatment of neurodegenerative diseases such as Alzheimer's disease. As…	GO:0008631 intrinsic apoptotic signaling pathway in response to oxidative stress;GO:0042273 ribosomal large subunit biogenesis;GO:0046330 positive regulation of JNK cascade		Predicted intracellular proteins	Cytosol (Supported); Additional: Golgi apparatus;Nucleoli;Nucleoplasm				0.0	0.0	0.0	0.0	0.0	0.0	0.0	0.0	0.0	0.0	0.0	0.0	0.0	0.0	0.0	0.0	0.0	0.0	0.0	0.0
NTNG1	22854	symbol	H. sapiens	22854	H. sapiens	NTNG1	netrin G1	NTNG1, also known as netrin G1, is a gene that encodes a preproprotein that is processed into a secreted protein containing eukaryotic growth factor (EGF)-like domains. This protein plays a role in guiding axon growth during neuronal development. The gene has multiple transcript variants that encode distinct isoforms due to alternative splicing. Polymorphisms in this gene have been associated wit…	Polymorphisms in the NTNG1 gene have been associated with schizophrenia, a severe mental disorder characterized by delusions, hallucinations, and disordered thinking. Targeted drug discovery efforts for schizophrenia have focused on modulating neurotransmitter systems, such as dopamine and glutamate, which are known to be dysregulated in the disorder. However, there are currently no drugs on the …	GO:0150011 regulation of neuron projection arborization;GO:0099560 synaptic membrane adhesion;GO:2001222 regulation of neuron migration		Predicted intracellular proteins	Plasma membrane (Supported)		(M5887)NABA BASEMENT MEMBRANES; (M3008)NABA ECM GLYCOPROTEINS; (M5884)NABA CORE MATRISOME	(M5916)HALLMARK APICAL SURFACE	1.0	0.0	1.0	1.0	0.0	0.0	0.0	0.0	0.0	0.0	0.0	0.0	1.0	0.0	0.0	0.0	0.0	0.0	1.0	0.0
NDUFS3	4722	symbol	H. sapiens	4722	H. sapiens	NDUFS3	NADH:ubiquinone oxidoreductase core subunit S3	The NDUFS3 gene encodes a protein that is a component of the mitochondrial NADH:ubiquinone oxidoreductase complex I. This protein is involved in the transfer of electrons during cellular respiration. Mutations in this gene have been linked to Leigh syndrome, a rare genetic disorder that affects the central nervous system and is caused by a deficiency in mitochondrial complex I. Symptoms of Leigh …	There are currently no targeted drug discovery efforts specifically for the NDUFS3 gene. However, research into mitochondrial complex I and its role in various diseases, including Leigh syndrome, is ongoing. Some potential therapeutic approaches being explored include gene therapy, stem cell therapy, and the use of small molecules to target mitochondrial dysfunction. There are currently no drugs …	GO:0006120 mitochondrial electron transport, NADH to ubiquinone;GO:0021762 substantia nigra development;GO:0010257 NADH dehydrogenase complex assembly		Predicted intracellular proteins; Human disease related genes:Congenital disorders of metabolism:Mitochondrial diseases; Potential drug targets; Enzymes; Disease related genes; ENZYME proteins	Mitochondria (Supported); Additional: Nuclear bodies;Principal piece	NADH		(M5905)HALLMARK ADIPOGENESIS; (M5936)HALLMARK OXIDATIVE PHOSPHORYLATION	0.0	1.0	0.0	0.0	0.0	0.0	0.0	1.0	1.0	0.0	1.0	0.0	0.0	0.0	1.0	0.0	0.0	0.0	0.0	0.0
MRPL15	29088	symbol	H. sapiens	29088	H. sapiens	MRPL15	mitochondrial ribosomal protein L15	The MRPL15 gene encodes a protein that is a component of the large 39S subunit of the mitochondrial ribosome. Mitochondrial ribosomes are responsible for protein synthesis within the mitochondrion, and are composed of a small 28S subunit and a large 39S subunit. Mammalian mitochondrial ribosomal proteins are encoded by nuclear genes and have a different protein to rRNA composition compared to pro…	There is limited information available on the disease implications of MRPL15 mutations. However, mutations in other mitochondrial ribosomal protein genes have been associated with a range of mitochondrial disorders, including Leigh syndrome, mitochondrial encephalomyopathy, and mitochondrial myopathy. Targeted drug discovery efforts for mitochondrial disorders have focused on improving mitochondr…	GO:1990830 cellular response to leukemia inhibitory factor;GO:1990823 response to leukemia inhibitory factor;GO:0032543 mitochondrial translation		Ribosomal proteins; Predicted intracellular proteins	Mitochondria (Supported)			(M5905)HALLMARK ADIPOGENESIS; (M5936)HALLMARK OXIDATIVE PHOSPHORYLATION	0.0	0.0	0.0	0.0	0.0	0.0	0.0	0.0	0.0	0.0	0.0	0.0	0.0	0.0	0.0	0.0	0.0	0.0	0.0	0.0
FAM73A	374986	gene_synonym	H. sapiens	374986	H. sapiens	MIGA1	mitoguardin 1	MIGA1, also known as mitoguardin 1, is a human gene that plays a role in mitochondrial fusion. It enables protein heterodimerization and homodimerization activities and is located in the mitochondrion as well as being an integral component of the plasma membrane. This information is provided by the Alliance of Genome Resources as of April 2022.	There is limited information available on the disease implications of MIGA1. However, recent studies have suggested that mutations in MIGA1 may be associated with mitochondrial dysfunction and neurodegenerative diseases such as Parkinson's disease. Targeted drug discovery efforts for MIGA1 are still in the early stages, but there is potential for the development of drugs that can modulate mitocho…	GO:0008053 mitochondrial fusion;GO:0048284 organelle fusion;GO:0007005 mitochondrion organization		Transporters:Accessory Factors Involved in Transport	Mitochondria (Supported)				0.0	0.0	0.0	0.0	0.0	0.0	0.0	0.0	0.0	0.0	0.0	0.0	0.0	0.0	0.0	0.0	0.0	0.0	0.0	0.0
C16orf42	115939	gene_synonym	H. sapiens	115939	H. sapiens	TSR3	TSR3 ribosome maturation factor	TSR3 is a human gene that encodes for a ribosome maturation factor. It plays a role in enzyme-directed rRNA pseudouridine synthesis and enables transferase activity. The gene is predicted to be located in the cytosol.	There is limited information available on the disease implications of TSR3. However, recent studies have suggested that mutations in TSR3 may be associated with developmental disorders such as intellectual disability and autism spectrum disorders. Targeted drug discovery efforts for TSR3 are still in the early stages, and there are currently no drugs on the market that specifically target this ge…	GO:0000455 enzyme-directed rRNA pseudouridine synthesis;GO:0031118 rRNA pseudouridine synthesis;GO:0001522 pseudouridine synthesis		Predicted intracellular proteins	Cytosol (Approved); Additional: Golgi apparatus				0.0	0.0	0.0	0.0	0.0	0.0	0.0	0.0	0.0	0.0	0.0	0.0	0.0	0.0	0.0	0.0	0.0	0.0	0.0	0.0
A_24_P33055						None	None	None	None	None	None	None	None	None	None	None	nan	nan	nan	nan	nan	nan	nan	nan	nan	nan	nan	nan	nan	nan	nan	nan	nan	nan	nan	nan
[truncated: 121 more rows]

## Sheet: Enrichment
GroupID	Category	Term	Description	LogP	Log(q-value)	Genes	Symbols	InTerm_InList
[truncated: 283 more rows]
